# Supplementary material for: Controlled release testing of the static chamber methodology for direct measurements of methane emissions
Source: Copernicus journal article supplement (doi:10.5194/amt-2023-27), 2023-03-13
Supplement: Supplementary file 2 [file 20230209_IPCC_EmissionFactors_AFOLU_AMT.xlsx]

## Sheet: Methane_Flowrates_AFOLU
EF ID	IPCC 1996 Source/Sink Category	IPCC 2006 Source/Sink Category	Gas	Type of parameter	Description	Technologies / Practices	Parameters / Conditions	Region / Regional Conditions	Abatement / Control Technologies	Other properties	Value	Unit	Equation	IPCC Worksheet	Technical Reference	Source of data	Data provider	Value_2	EF_g_hour	Scale	Source
43088	4A2 - Buffalo	3.A.1.b - Buffalo	METHANE	1996 IPCC default	Enteric Fermentation Emission Factor			Country: Developed Countries			55	kg/head/yr	Equation 4.12 on Page 4.25 of the IPCC Good Practice Guidance and Uncertainty Management in National Greenhouse Gas Inventories	Worksheet 4-1, Sheet 1 of 2	Gibbs, M.J. and D.E. Johnson (1993), "Livestock Emissions." In: International Methane Emissions, US Environmental Protection Agency, Climate Change Division, Washington, D.C., U.S.A.	Revised 1996 IPCC Guidelines for National Greenhouse Gas Inventories (Table 4-3 on Page 4.10 of the Reference Manual)	IPCC	55	6.27854	Component	AFOLU	1	head of cattle = 1 component
43089	4A2 - Buffalo	3.A.1.b - Buffalo	METHANE	1996 IPCC default	Enteric Fermentation Emission Factor			Country: Developing Countries			55	kg/head/yr	Equation 4.12 on Page 4.25 of the IPCC Good Practice Guidance and Uncertainty Management in National Greenhouse Gas Inventories	Worksheet 4-1, Sheet 1 of 2	Gibbs, M.J. and D.E. Johnson (1993), "Livestock Emissions." In: International Methane Emissions, US Environmental Protection Agency, Climate Change Division, Washington, D.C., U.S.A.	Revised 1996 IPCC Guidelines for National Greenhouse Gas Inventories (Table 4-3 on Page 4.10 of the Reference Manual)	IPCC	55	6.27854	Component	AFOLU	16.04	grams per mol of CH4
43090	4A3 - Sheep	3.A.1.c - Sheep	METHANE	1996 IPCC default	Enteric Fermentation Emission Factor			Country: Developed Countries			8	kg/head/yr	Equation 4.12 on Page 4.25 of the IPCC Good Practice Guidance and Uncertainty Management in National Greenhouse Gas Inventories	Worksheet 4-1, Sheet 1 of 2	Crutzen, P.J., I. Aselmann and W. Seiler (1986), "Methane Production by Domestic Animals, Wild Ruminants, Other Herbivorous Fauna, and Humans," Tellus 38B:271-284	Revised 1996 IPCC Guidelines for National Greenhouse Gas Inventories (Table 4-3 on Page 4.10 of the Reference Manual)	IPCC	8	0.913242	Component	AFOLU
43091	4A3 - Sheep	3.A.1.c - Sheep	METHANE	1996 IPCC default	Enteric Fermentation Emission Factor			Country: Developing Countries			5	kg/head/yr	Equation 4.12 on Page 4.25 of the IPCC Good Practice Guidance and Uncertainty Management in National Greenhouse Gas Inventories	Worksheet 4-1, Sheet 1 of 2	Crutzen, P.J., I. Aselmann and W. Seiler (1986), "Methane Production by Domestic Animals, Wild Ruminants, Other Herbivorous Fauna, and Humans," Tellus 38B:271-284	Revised 1996 IPCC Guidelines for National Greenhouse Gas Inventories (Table 4-3 on Page 4.10 of the Reference Manual)	IPCC	5	0.570776	Component	AFOLU
43092	4A4 - Goats	3.A.1.d - Goats	METHANE	1996 IPCC default	Enteric Fermentation Emission Factor			Country: Developed Countries			5	kg/head/yr	Equation 4.12 on Page 4.25 of the IPCC Good Practice Guidance and Uncertainty Management in National Greenhouse Gas Inventories	Worksheet 4-1, Sheet 1 of 2	Crutzen, P.J., I. Aselmann and W. Seiler (1986), "Methane Production by Domestic Animals, Wild Ruminants, Other Herbivorous Fauna, and Humans," Tellus 38B:271-284	Revised 1996 IPCC Guidelines for National Greenhouse Gas Inventories (Table 4-3 on Page 4.10 of the Reference Manual)	IPCC	5	0.570776	Component	AFOLU
43094	4A5 - Camels and Llamas	3.A.1.e - Camels	METHANE	1996 IPCC default	Enteric Fermentation Emission Factor			Country: Developed Countries			46	kg/head/yr	Equation 4.12 on Page 4.25 of the IPCC Good Practice Guidance and Uncertainty Management in National Greenhouse Gas Inventories	Worksheet 4-1, Sheet 1 of 2	Gibbs, M.J. and D.E. Johnson (1993), "Livestock Emissions." In: International Methane Emissions, US Environmental Protection Agency, Climate Change Division, Washington, D.C., U.S.A.	Revised 1996 IPCC Guidelines for National Greenhouse Gas Inventories (Table 4-3 on Page 4.10 of the Reference Manual)	IPCC	46	5.25114	Component	AFOLU
43095	4A5 - Camels and Llamas	3.A.1.e - Camels	METHANE	1996 IPCC default	Enteric Fermentation Emission Factor			Country: Developing Countries			46	kg/head/yr	Equation 4.12 on Page 4.25 of the IPCC Good Practice Guidance and Uncertainty Management in National Greenhouse Gas Inventories	Worksheet 4-1, Sheet 1 of 2	Gibbs, M.J. and D.E. Johnson (1993), "Livestock Emissions." In: International Methane Emissions, US Environmental Protection Agency, Climate Change Division, Washington, D.C., U.S.A.	Revised 1996 IPCC Guidelines for National Greenhouse Gas Inventories (Table 4-3 on Page 4.10 of the Reference Manual)	IPCC	46	5.25114	Component	AFOLU
43096	4A6 - Horses	3.A.1.f - Horses	METHANE	1996 IPCC default	Enteric Fermentation Emission Factor			Country: Developed Countries			18	kg/head/yr	Equation 4.12 on Page 4.25 of the IPCC Good Practice Guidance and Uncertainty Management in National Greenhouse Gas Inventories	Worksheet 4-1, Sheet 1 of 2	Crutzen, P.J., I. Aselmann and W. Seiler (1986), "Methane Production by Domestic Animals, Wild Ruminants, Other Herbivorous Fauna, and Humans," Tellus 38B:271-284	Revised 1996 IPCC Guidelines for National Greenhouse Gas Inventories (Table 4-3 on Page 4.10 of the Reference Manual)	IPCC	18	2.05479	Component	AFOLU
43097	4A6 - Horses	3.A.1.f - Horses	METHANE	1996 IPCC default	Enteric Fermentation Emission Factor			Country: Developing Countries			18	kg/head/yr	Equation 4.12 on Page 4.25 of the IPCC Good Practice Guidance and Uncertainty Management in National Greenhouse Gas Inventories	Worksheet 4-1, Sheet 1 of 2	Crutzen, P.J., I. Aselmann and W. Seiler (1986), "Methane Production by Domestic Animals, Wild Ruminants, Other Herbivorous Fauna, and Humans," Tellus 38B:271-284	Revised 1996 IPCC Guidelines for National Greenhouse Gas Inventories (Table 4-3 on Page 4.10 of the Reference Manual)	IPCC	18	2.05479	Component	AFOLU
43098	4A7 - Mules and Asses	3.A.1.g - Mules and Asses	METHANE	1996 IPCC default	Enteric Fermentation Emission Factor			Country: Developed Countries			10	kg/head/yr	Equation 4.12 on Page 4.25 of the IPCC Good Practice Guidance and Uncertainty Management in National Greenhouse Gas Inventories	Worksheet 4-1, Sheet 1 of 2	Crutzen, P.J., I. Aselmann and W. Seiler (1986), "Methane Production by Domestic Animals, Wild Ruminants, Other Herbivorous Fauna, and Humans," Tellus 38B:271-284	Revised 1996 IPCC Guidelines for National Greenhouse Gas Inventories (Table 4-3 on Page 4.10 of the Reference Manual)	IPCC	10	1.14155	Component	AFOLU
43099	4A7 - Mules and Asses	3.A.1.g - Mules and Asses	METHANE	1996 IPCC default	Enteric Fermentation Emission Factor			Country: Developing Countries			10	kg/head/yr	Equation 4.12 on Page 4.25 of the IPCC Good Practice Guidance and Uncertainty Management in National Greenhouse Gas Inventories	Worksheet 4-1, Sheet 1 of 2	Crutzen, P.J., I. Aselmann and W. Seiler (1986), "Methane Production by Domestic Animals, Wild Ruminants, Other Herbivorous Fauna, and Humans," Tellus 38B:271-284	Revised 1996 IPCC Guidelines for National Greenhouse Gas Inventories (Table 4-3 on Page 4.10 of the Reference Manual)	IPCC	10	1.14155	Component	AFOLU
43100	4A8 - Swine	3.A.1.h - Swine	METHANE	1996 IPCC default	Enteric Fermentation Emission Factor			Country: Developed Countries			1.5	kg/head/yr	Equation 4.12 on Page 4.25 of the IPCC Good Practice Guidance and Uncertainty Management in National Greenhouse Gas Inventories	Worksheet 4-1, Sheet 1 of 2	Crutzen, P.J., I. Aselmann and W. Seiler (1986), "Methane Production by Domestic Animals, Wild Ruminants, Other Herbivorous Fauna, and Humans," Tellus 38B:271-284	Revised 1996 IPCC Guidelines for National Greenhouse Gas Inventories (Table 4-3 on Page 4.10 of the Reference Manual)	IPCC	1.5	0.171233	Component	AFOLU
43101	4A8 - Swine	3.A.1.h - Swine	METHANE	1996 IPCC default	Enteric Fermentation Emission Factor			Country: Developing Countries			1.0	kg/head/yr	Equation 4.12 on Page 4.25 of the IPCC Good Practice Guidance and Uncertainty Management in National Greenhouse Gas Inventories	Worksheet 4-1, Sheet 1 of 2	Crutzen, P.J., I. Aselmann and W. Seiler (1986), "Methane Production by Domestic Animals, Wild Ruminants, Other Herbivorous Fauna, and Humans," Tellus 38B:271-284	Revised 1996 IPCC Guidelines for National Greenhouse Gas Inventories (Table 4-3 on Page 4.10 of the Reference Manual)	IPCC	1	0.114155	Component	AFOLU
43104	4A1a - Dairy	3.A.1.a.i - Dairy Cows	METHANE	1996 IPCC default	Enteric Fermentation Emission Factors for Cattle	Highly productive commercialised dairy sector feeding high quality forage and grain.	Average milk production of 6,700 kg/head/yr	Region: North America			118	kg/head/yr	Equation 4.12 on Page 4.25 of the IPCC Good Practice Guidance and Uncertainty Management in National Greenhouse Gas Inventories	Worksheet 4-1, Sheet 1 of 2	Gibbs, M.J. and D.E. Johnson (1993), "Livestock Emissions." In: International Methane Emissions, US Environmental Protection Agency, Climate Change Division, Washington, D.C., U.S.A.	Revised 1996 IPCC Guidelines for National Greenhouse Gas Inventories (Table 4-4 on Page 4.11 of the Reference Manual)	IPCC	118	13.4703	Component	AFOLU
43105	4A1b - Non-Dairy	3.A.1.a.ii - Other Cattle	METHANE	1996 IPCC default	Enteric Fermentation Emission Factors for Cattle	Separate beef cow herd, primarily grazing with feed supplements seasonally. Fast-growing beef steers/heifers finished in feedlots on grain.	Includes beef cows, bulls, calves, growing steers/heifers, and feedlot cattle	Region: North America			47	kg/head/yr	Equation 4.12 on Page 4.25 of the IPCC Good Practice Guidance and Uncertainty Management in National Greenhouse Gas Inventories	Worksheet 4-1, Sheet 1 of 2	Gibbs, M.J. and D.E. Johnson (1993), "Livestock Emissions." In: International Methane Emissions, US Environmental Protection Agency, Climate Change Division, Washington, D.C., U.S.A.	Revised 1996 IPCC Guidelines for National Greenhouse Gas Inventories (Table 4-4 on Page 4.11 of the Reference Manual)	IPCC	47	5.3653	Component	AFOLU
43106	4A1a - Dairy	3.A.1.a.i - Dairy Cows	METHANE	1996 IPCC default	Enteric Fermentation Emission Factors for Cattle	Highly productive commercialised dairy sector feeding high quality forage and grain. Dairy cows also used for beef calf production.	Average milk production of 4,200 kg/head/yr	Region: Western Europe			100	kg/head/yr	Equation 4.12 on Page 4.25 of the IPCC Good Practice Guidance and Uncertainty Management in National Greenhouse Gas Inventories	Worksheet 4-1, Sheet 1 of 2	Gibbs, M.J. and D.E. Johnson (1993), "Livestock Emissions." In: International Methane Emissions, US Environmental Protection Agency, Climate Change Division, Washington, D.C., U.S.A.	Revised 1996 IPCC Guidelines for National Greenhouse Gas Inventories (Table 4-4 on Page 4.11 of the Reference Manual)	IPCC	100	11.4155	Component	AFOLU
43107	4A1b - Non-Dairy	3.A.1.a.ii - Other Cattle	METHANE	1996 IPCC default	Enteric Fermentation Emission Factors for Cattle	Very small dedicated beef cow herd. Minor amount of feedlot feeding with grains.	Includes bulls, calves, and growing steers/heifers	Region: Western Europe			48	kg/head/yr	Equation 4.12 on Page 4.25 of the IPCC Good Practice Guidance and Uncertainty Management in National Greenhouse Gas Inventories	Worksheet 4-1, Sheet 1 of 2	Gibbs, M.J. and D.E. Johnson (1993), "Livestock Emissions." In: International Methane Emissions, US Environmental Protection Agency, Climate Change Division, Washington, D.C., U.S.A.	Revised 1996 IPCC Guidelines for National Greenhouse Gas Inventories (Table 4-4 on Page 4.11 of the Reference Manual)	IPCC	48	5.47945	Component	AFOLU
43108	4A1a - Dairy	3.A.1.a.i - Dairy Cows	METHANE	1996 IPCC default	Enteric Fermentation Emission Factors for Cattle	Commercialised dairy sector feeding mostly forages.	Average milk production of 2,550 kg/head/yr	Region: Eastern Europe			81	kg/head/yr	Equation 4.12 on Page 4.25 of the IPCC Good Practice Guidance and Uncertainty Management in National Greenhouse Gas Inventories	Worksheet 4-1, Sheet 1 of 2	Gibbs, M.J. and D.E. Johnson (1993), "Livestock Emissions." In: International Methane Emissions, US Environmental Protection Agency, Climate Change Division, Washington, D.C., U.S.A.	Revised 1996 IPCC Guidelines for National Greenhouse Gas Inventories (Table 4-4 on Page 4.11 of the Reference Manual)	IPCC	81	9.24658	Component	AFOLU
43109	4A1b - Non-Dairy	3.A.1.a.ii - Other Cattle	METHANE	1996 IPCC default	Enteric Fermentation Emission Factors for Cattle	Separate beef cow herd, primarily grazing. Minor amount of feedlot feeding with grains.	Includes beef cows, bulls, and young	Region: Eastern Europe			56	kg/head/yr	Equation 4.12 on Page 4.25 of the IPCC Good Practice Guidance and Uncertainty Management in National Greenhouse Gas Inventories	Worksheet 4-1, Sheet 1 of 2	Gibbs, M.J. and D.E. Johnson (1993), "Livestock Emissions." In: International Methane Emissions, US Environmental Protection Agency, Climate Change Division, Washington, D.C., U.S.A.	Revised 1996 IPCC Guidelines for National Greenhouse Gas Inventories (Table 4-4 on Page 4.11 of the Reference Manual)	IPCC	56	6.39269	Component	AFOLU
43110	4A1a - Dairy	3.A.1.a.i - Dairy Cows	METHANE	1996 IPCC default	Enteric Fermentation Emission Factors for Cattle	Commercialised dairy sector based on grazing.	Average milk production of 1,700 kg/head/yr	Region: Oceania			68	kg/head/yr	Equation 4.12 on Page 4.25 of the IPCC Good Practice Guidance and Uncertainty Management in National Greenhouse Gas Inventories	Worksheet 4-1, Sheet 1 of 2	Gibbs, M.J. and D.E. Johnson (1993), "Livestock Emissions." In: International Methane Emissions, US Environmental Protection Agency, Climate Change Division, Washington, D.C., U.S.A.	Revised 1996 IPCC Guidelines for National Greenhouse Gas Inventories (Table 4-4 on Page 4.11 of the Reference Manual)	IPCC	68	7.76256	Component	AFOLU
43111	4A1b - Non-Dairy	3.A.1.a.ii - Other Cattle	METHANE	1996 IPCC default	Enteric Fermentation Emission Factors for Cattle	Separate beef cow, primarily grazing rangelands of widely varying quality. Growing amount of feedlot feeding with grains.	Includes beef cows, bulls, and young	Region: Oceania			53	kg/head/yr	Equation 4.12 on Page 4.25 of the IPCC Good Practice Guidance and Uncertainty Management in National Greenhouse Gas Inventories	Worksheet 4-1, Sheet 1 of 2	Gibbs, M.J. and D.E. Johnson (1993), "Livestock Emissions." In: International Methane Emissions, US Environmental Protection Agency, Climate Change Division, Washington, D.C., U.S.A.	Revised 1996 IPCC Guidelines for National Greenhouse Gas Inventories (Table 4-4 on Page 4.11 of the Reference Manual)	IPCC	53	6.05023	Component	AFOLU
43112	4A1a - Dairy	3.A.1.a.i - Dairy Cows	METHANE	1996 IPCC default	Enteric Fermentation Emission Factors for Cattle	Commercialised dairy sector based on grazing.	Average milk production of 800 kg/head/yr	Region: Latin America			57	kg/head/yr	Equation 4.12 on Page 4.25 of the IPCC Good Practice Guidance and Uncertainty Management in National Greenhouse Gas Inventories	Worksheet 4-1, Sheet 1 of 2	Gibbs, M.J. and D.E. Johnson (1993), "Livestock Emissions." In: International Methane Emissions, US Environmental Protection Agency, Climate Change Division, Washington, D.C., U.S.A.	Revised 1996 IPCC Guidelines for National Greenhouse Gas Inventories (Table 4-4 on Page 4.11 of the Reference Manual)	IPCC	57	6.50685	Component	AFOLU
43113	4A1b - Non-Dairy	3.A.1.a.ii - Other Cattle	METHANE	1996 IPCC default	Enteric Fermentation Emission Factors for Cattle	Separate beef cow herd grazing pastures and rangelands. Minor amount of feedlot feeding with grains.	Includes beef cows, bulls, and young	Region: Latin America			49	kg/head/yr	Equation 4.12 on Page 4.25 of the IPCC Good Practice Guidance and Uncertainty Management in National Greenhouse Gas Inventories	Worksheet 4-1, Sheet 1 of 2	Gibbs, M.J. and D.E. Johnson (1993), "Livestock Emissions." In: International Methane Emissions, US Environmental Protection Agency, Climate Change Division, Washington, D.C., U.S.A.	Revised 1996 IPCC Guidelines for National Greenhouse Gas Inventories (Table 4-4 on Page 4.11 of the Reference Manual)	IPCC	49	5.59361	Component	AFOLU
43114	4A1a - Dairy	3.A.1.a.i - Dairy Cows	METHANE	1996 IPCC default	Enteric Fermentation Emission Factors for Cattle	Small commercialised dairy sector.	Average milk production of 1,650 kg/head/yr	Region: Asia			56	kg/head/yr	Equation 4.12 on Page 4.25 of the IPCC Good Practice Guidance and Uncertainty Management in National Greenhouse Gas Inventories	Worksheet 4-1, Sheet 1 of 2	Gibbs, M.J. and D.E. Johnson (1993), "Livestock Emissions." In: International Methane Emissions, US Environmental Protection Agency, Climate Change Division, Washington, D.C., U.S.A.	Revised 1996 IPCC Guidelines for National Greenhouse Gas Inventories (Table 4-4 on Page 4.11 of the Reference Manual)	IPCC	56	6.39269	Component	AFOLU
43115	4A1b - Non-Dairy	3.A.1.a.ii - Other Cattle	METHANE	1996 IPCC default	Enteric Fermentation Emission Factors for Cattle	Most cattle are multi-purpose, providing power and some milk within farming regions. Small grazing population. Cattle of all types are smaller than those found in most other regions.	Includes multi-purpose cows, bulls, and young	Region: Asia			44	kg/head/yr	Equation 4.12 on Page 4.25 of the IPCC Good Practice Guidance and Uncertainty Management in National Greenhouse Gas Inventories	Worksheet 4-1, Sheet 1 of 2	Gibbs, M.J. and D.E. Johnson (1993), "Livestock Emissions." In: International Methane Emissions, US Environmental Protection Agency, Climate Change Division, Washington, D.C., U.S.A.	Revised 1996 IPCC Guidelines for National Greenhouse Gas Inventories (Table 4-4 on Page 4.11 of the Reference Manual)	IPCC	44	5.02283	Component	AFOLU
43116	4A1a - Dairy	3.A.1.a.i - Dairy Cows	METHANE	1996 IPCC default	Enteric Fermentation Emission Factors for Cattle	Commercialised dairy sector based on grazing with low production per cow.	Average milk production of 475 kg/head/yr	Region: Africa and Middle East			36	kg/head/yr	Equation 4.12 on Page 4.25 of the IPCC Good Practice Guidance and Uncertainty Management in National Greenhouse Gas Inventories	Worksheet 4-1, Sheet 1 of 2	Gibbs, M.J. and D.E. Johnson (1993), "Livestock Emissions." In: International Methane Emissions, US Environmental Protection Agency, Climate Change Division, Washington, D.C., U.S.A.	Revised 1996 IPCC Guidelines for National Greenhouse Gas Inventories (Table 4-4 on Page 4.11 of the Reference Manual)	IPCC	36	4.10959	Component	AFOLU
43117	4A1b - Non-Dairy	3.A.1.a.ii - Other Cattle	METHANE	1996 IPCC default	Enteric Fermentation Emission Factors for Cattle	Most cattle are multi-purpose, providing draft power and some milk within farming regions. Some cattle graze over very large areas. Cattle of all types are smaller than those found in most other regions.	Includes multi-purpose cows, bulls, and young	Region: Africa and Middle East			32	kg/head/yr	Equation 4.12 on Page 4.25 of the IPCC Good Practice Guidance and Uncertainty Management in National Greenhouse Gas Inventories	Worksheet 4-1, Sheet 1 of 2	Gibbs, M.J. and D.E. Johnson (1993), "Livestock Emissions." In: International Methane Emissions, US Environmental Protection Agency, Climate Change Division, Washington, D.C., U.S.A.	Revised 1996 IPCC Guidelines for National Greenhouse Gas Inventories (Table 4-4 on Page 4.11 of the Reference Manual)	IPCC	32	3.65297	Component	AFOLU
43118	4A1a - Dairy	3.A.1.a.i - Dairy Cows	METHANE	1996 IPCC default	Enteric Fermentation Emission Factors for Cattle	Commercialised dairy sector based on crop by-product feeding with low production per cow.	Average milk production of 900 kg/head/yr	Region: Indian Subcontinent	-	Average milk production of 900 kg/head/yr.	46	kg/head/yr	Equation 4.12 on Page 4.25 of the IPCC Good Practice Guidance and Uncertainty Management in National Greenhouse Gas Inventories	Worksheet 4-1, Sheet 1 of 2	Gibbs, M.J. and D.E. Johnson (1993), "Livestock Emissions." In: International Methane Emissions, US Environmental Protection Agency, Climate Change Division, Washington, D.C., U.S.A.	Revised 1996 IPCC Guidelines for National Greenhouse Gas Inventories (Table 4-4 on Page 4.11 of the Reference Manual)	IPCC	46	5.25114	Component	AFOLU
43119	4A1b - Non-Dairy	3.A.1.a.ii - Other Cattle	METHANE	1996 IPCC default	Enteric Fermentation Emission Factors for Cattle	Most bullocks provide draft power and cows provide some milk in farming regions. Small grazing population. Cattle in this region are the smallest compared to cattle	Includes cows, bulls, and young. Young comprise a large portion of the population	Region: Indian Subcontinent			25	kg/head/yr	Equation 4.12 on Page 4.25 of the IPCC Good Practice Guidance and Uncertainty Management in National Greenhouse Gas Inventories	Worksheet 4-1, Sheet 1 of 2	Gibbs, M.J. and D.E. Johnson (1993), "Livestock Emissions." In: International Methane Emissions, US Environmental Protection Agency, Climate Change Division, Washington, D.C., U.S.A.	Revised 1996 IPCC Guidelines for National Greenhouse Gas Inventories (Table 4-4 on Page 4.11 of the Reference Manual)	IPCC	25	2.85388	Component	AFOLU
43120	4B3 - Sheep	3.A.2.c - Sheep	METHANE	1996 IPCC default	Manure Management Emission Factor	All manure is assumed to be managed in dry manure management systems, including pastures and ranges, drylots, and daily spreading on fields.	Annual Average temperature is less than 15 C; MCF value used in the estimation is 1%	Climate: Cool; Country: Developed Countries			0.19	kg/head/yr	Equation 4.15 on Page 4.30 of the IPCC Good Practice Guidance and Uncertainty Management in National Greenhouse Gas Inventories	Worksheet 4-1, Sheet 1 of 2	Woodbury, J.W. and A. Hashimoto (1993), "Methane Emissions from Livestock Manure." In International Methane Emissions, US Environmental Protection Agency, Climate Change Division, Washington, D.C., U.S.A.	Revised 1996 IPCC Guidelines for National Greenhouse Gas Inventories (Table 4-5 on Page 4.12 of the Reference Manual)	IPCC	0.19	0.0216895	Component	AFOLU
43121	4B3 - Sheep	3.A.2.c - Sheep	METHANE	1996 IPCC default	Manure Management Emission Factor	All manure is assumed to be managed in dry manure management systems, including pastures and ranges, drylots, and daily spreading on fields.	Annual Average temperature is between 15 C and 25 C; MCF value used in the estimation is 1.5 %	Climate: Temp; Country: Developed Countries			0.28	kg/head/yr	Equation 4.15 on Page 4.30 of the IPCC Good Practice Guidance and Uncertainty Management in National Greenhouse Gas Inventories	Worksheet 4-1, Sheet 1 of 2	Woodbury, J.W. and A. Hashimoto (1993), "Methane Emissions from Livestock Manure." In International Methane Emissions, US Environmental Protection Agency, Climate Change Division, Washington, D.C., U.S.A.	Revised 1996 IPCC Guidelines for National Greenhouse Gas Inventories (Table 4-5 on Page 4.12 of the Reference Manual)	IPCC	0.28	0.0319635	Component	AFOLU
43122	4B3 - Sheep	3.A.2.c - Sheep	METHANE	1996 IPCC default	Manure Management Emission Factor	All manure is assumed to be managed in dry manure management systems, including pastures and ranges, drylots, and daily spreading on fields.	Annual Average temperature is greater than 25 C; MCF value used in the estimation is 2%	Climate: Warm; Country: Developed Countries			0.37	kg/head/yr	Equation 4.15 on Page 4.30 of the IPCC Good Practice Guidance and Uncertainty Management in National Greenhouse Gas Inventories	Worksheet 4-1, Sheet 1 of 2	Woodbury, J.W. and A. Hashimoto (1993), "Methane Emissions from Livestock Manure." In International Methane Emissions, US Environmental Protection Agency, Climate Change Division, Washington, D.C., U.S.A.	Revised 1996 IPCC Guidelines for National Greenhouse Gas Inventories (Table 4-5 on Page 4.12 of the Reference Manual)	IPCC	0.37	0.0422374	Component	AFOLU
43123	4B3 - Sheep	3.A.2.c - Sheep	METHANE	1996 IPCC default	Manure Management Emission Factor	All manure is assumed to be managed in dry manure management systems, including pastures and ranges, drylots, and daily spreading on fields.	Annual Average temperature is less than 15 C; MCF value used in the estimation is 1%	Climate: Cool; Country: Developing Countries			0.10	kg/head/yr	Equation 4.15 on Page 4.30 of the IPCC Good Practice Guidance and Uncertainty Management in National Greenhouse Gas Inventories	Worksheet 4-1, Sheet 1 of 2	Woodbury, J.W. and A. Hashimoto (1993), "Methane Emissions from Livestock Manure." In International Methane Emissions, US Environmental Protection Agency, Climate Change Division, Washington, D.C., U.S.A.	Revised 1996 IPCC Guidelines for National Greenhouse Gas Inventories (Table 4-5 on Page 4.12 of the Reference Manual)	IPCC	0.1	0.0114155	Component	AFOLU
43124	4B3 - Sheep	3.A.2.c - Sheep	METHANE	1996 IPCC default	Manure Management Emission Factor	All manure is assumed to be managed in dry manure management systems, including pastures and ranges, drylots, and daily spreading on fields.	Annual Average temperature is between 15 C and 25 C; MCF value used in the estimation is 1.5 %	Climate: Temp; Country: Developing Countries			0.16	kg/head/yr	Equation 4.15 on Page 4.30 of the IPCC Good Practice Guidance and Uncertainty Management in National Greenhouse Gas Inventories	Worksheet 4-1, Sheet 1 of 2	Woodbury, J.W. and A. Hashimoto (1993), "Methane Emissions from Livestock Manure." In International Methane Emissions, US Environmental Protection Agency, Climate Change Division, Washington, D.C., U.S.A.	Revised 1996 IPCC Guidelines for National Greenhouse Gas Inventories (Table 4-5 on Page 4.12 of the Reference Manual)	IPCC	0.16	0.0182648	Component	AFOLU
43125	4B3 - Sheep	3.A.2.c - Sheep	METHANE	1996 IPCC default	Manure Management Emission Factor	All manure is assumed to be managed in dry manure management systems, including pastures and ranges, drylots, and daily spreading on fields.	Annual Average temperature is greater than 25 C; MCF value used in the estimation is 2%	Climate: Warm; Country: Developing Countries			0.21	kg/head/yr	Equation 4.15 on Page 4.30 of the IPCC Good Practice Guidance and Uncertainty Management in National Greenhouse Gas Inventories	Worksheet 4-1, Sheet 1 of 2	Woodbury, J.W. and A. Hashimoto (1993), "Methane Emissions from Livestock Manure." In International Methane Emissions, US Environmental Protection Agency, Climate Change Division, Washington, D.C., U.S.A.	Revised 1996 IPCC Guidelines for National Greenhouse Gas Inventories (Table 4-5 on Page 4.12 of the Reference Manual)	IPCC	0.21	0.0239726	Component	AFOLU
43126	4B4 - Goats	3.A.2.d - Goats	METHANE	1996 IPCC default	Manure Management Emission Factor	All manure is assumed to be managed in dry manure management systems, including pastures and ranges, drylots, and daily spreading on fields.	Annual Average temperature is less than 15 C; MCF value used in the estimation is 1%	Climate: Cool; Country: Developed Countries			0.12	kg/head/yr	Equation 4.15 on Page 4.30 of the IPCC Good Practice Guidance and Uncertainty Management in National Greenhouse Gas Inventories	Worksheet 4-1, Sheet 1 of 2	Woodbury, J.W. and A. Hashimoto (1993), "Methane Emissions from Livestock Manure." In International Methane Emissions, US Environmental Protection Agency, Climate Change Division, Washington, D.C., U.S.A.	Revised 1996 IPCC Guidelines for National Greenhouse Gas Inventories (Table 4-5 on Page 4.12 of the Reference Manual)	IPCC	0.12	0.0136986	Component	AFOLU
43127	4B4 - Goats	3.A.2.d - Goats	METHANE	1996 IPCC default	Manure Management Emission Factor	All manure is assumed to be managed in dry manure management systems, including pastures and ranges, drylots, and daily spreading on fields.	Annual Average temperature is between 15 C and 25 C; MCF value used in the estimation is 1.5 %	Climate: Temp; Country: Developed Countries			0.18	kg/head/yr	Equation 4.15 on Page 4.30 of the IPCC Good Practice Guidance and Uncertainty Management in National Greenhouse Gas Inventories	Worksheet 4-1, Sheet 1 of 2	Woodbury, J.W. and A. Hashimoto (1993), "Methane Emissions from Livestock Manure." In International Methane Emissions, US Environmental Protection Agency, Climate Change Division, Washington, D.C., U.S.A.	Revised 1996 IPCC Guidelines for National Greenhouse Gas Inventories (Table 4-5 on Page 4.12 of the Reference Manual)	IPCC	0.18	0.0205479	Component	AFOLU
43128	4B4 - Goats	3.A.2.d - Goats	METHANE	1996 IPCC default	Manure Management Emission Factor	All manure is assumed to be managed in dry manure management systems, including pastures and ranges, drylots, and daily spreading on fields.	Annual Average temperature is greater than 25 C; MCF value used in the estimation is 2%	Climate: Warm; Country: Developed Countries			0.23	kg/head/yr	Equation 4.15 on Page 4.30 of the IPCC Good Practice Guidance and Uncertainty Management in National Greenhouse Gas Inventories	Worksheet 4-1, Sheet 1 of 2	Woodbury, J.W. and A. Hashimoto (1993), "Methane Emissions from Livestock Manure." In International Methane Emissions, US Environmental Protection Agency, Climate Change Division, Washington, D.C., U.S.A.	Revised 1996 IPCC Guidelines for National Greenhouse Gas Inventories (Table 4-5 on Page 4.12 of the Reference Manual)	IPCC	0.23	0.0262557	Component	AFOLU
43129	4B4 - Goats	3.A.2.d - Goats	METHANE	1996 IPCC default	Manure Management Emission Factor	All manure is assumed to be managed in dry manure management systems, including pastures and ranges, drylots, and daily spreading on fields.	Annual Average temperature is less than 15 C; MCF value used in the estimation is 1%	Climate: Cool; Country: Developing Countries			0.11	kg/head/yr	Equation 4.15 on Page 4.30 of the IPCC Good Practice Guidance and Uncertainty Management in National Greenhouse Gas Inventories	Worksheet 4-1, Sheet 1 of 2	Woodbury, J.W. and A. Hashimoto (1993), "Methane Emissions from Livestock Manure." In International Methane Emissions, US Environmental Protection Agency, Climate Change Division, Washington, D.C., U.S.A.	Revised 1996 IPCC Guidelines for National Greenhouse Gas Inventories (Table 4-5 on Page 4.12 of the Reference Manual)	IPCC	0.11	0.0125571	Component	AFOLU
43130	4B4 - Goats	3.A.2.d - Goats	METHANE	1996 IPCC default	Manure Management Emission Factor	All manure is assumed to be managed in dry manure management systems, including pastures and ranges, drylots, and daily spreading on fields.	Annual Average temperature is between 15 C and 25 C; MCF value used in the estimation is 1.5 %	Climate: Temp; Country: Developing Countries			0.17	kg/head/yr	Equation 4.15 on Page 4.30 of the IPCC Good Practice Guidance and Uncertainty Management in National Greenhouse Gas Inventories	Worksheet 4-1, Sheet 1 of 2	Woodbury, J.W. and A. Hashimoto (1993), "Methane Emissions from Livestock Manure." In International Methane Emissions, US Environmental Protection Agency, Climate Change Division, Washington, D.C., U.S.A.	Revised 1996 IPCC Guidelines for National Greenhouse Gas Inventories (Table 4-5 on Page 4.12 of the Reference Manual)	IPCC	0.17	0.0194064	Component	AFOLU
43131	4B4 - Goats	3.A.2.d - Goats	METHANE	1996 IPCC default	Manure Management Emission Factor	All manure is assumed to be managed in dry manure management systems, including pastures and ranges, drylots, and daily spreading on fields.	Annual Average temperature is greater than 25 C; MCF value used in the estimation is 2%	Climate: Warm; Country: Developing Countries			0.22	kg/head/yr	Equation 4.15 on Page 4.30 of the IPCC Good Practice Guidance and Uncertainty Management in National Greenhouse Gas Inventories	Worksheet 4-1, Sheet 1 of 2	Woodbury, J.W. and A. Hashimoto (1993), "Methane Emissions from Livestock Manure." In International Methane Emissions, US Environmental Protection Agency, Climate Change Division, Washington, D.C., U.S.A.	Revised 1996 IPCC Guidelines for National Greenhouse Gas Inventories (Table 4-5 on Page 4.12 of the Reference Manual)	IPCC	0.22	0.0251142	Component	AFOLU
43132	4B5 - Camels and Llamas	3.A.2.e - Camels	METHANE	1996 IPCC default	Manure Management Emission Factor	All manure is assumed to be managed in dry manure management systems, including pastures and ranges, drylots, and daily spreading on fields.	Annual Average temperature is less than 15 C; MCF value used in the estimation is 1%	Climate: Cool; Country: Developed Countries			1.6	kg/head/yr	Equation 4.15 on Page 4.30 of the IPCC Good Practice Guidance and Uncertainty Management in National Greenhouse Gas Inventories	Worksheet 4-1, Sheet 1 of 2	Woodbury, J.W. and A. Hashimoto (1993), "Methane Emissions from Livestock Manure." In International Methane Emissions, US Environmental Protection Agency, Climate Change Division, Washington, D.C., U.S.A.	Revised 1996 IPCC Guidelines for National Greenhouse Gas Inventories (Table 4-5 on Page 4.12 of the Reference Manual)	IPCC	1.6	0.182648	Component	AFOLU
43133	4B5 - Camels and Llamas	3.A.2.e - Camels	METHANE	1996 IPCC default	Manure Management Emission Factor	All manure is assumed to be managed in dry manure management systems, including pastures and ranges, drylots, and daily spreading on fields.	Annual Average temperature is between 15 C and 25 C; MCF value used in the estimation is 1.5 %	Climate: Temp; Country: Developed Countries			2.4	kg/head/yr	Equation 4.15 on Page 4.30 of the IPCC Good Practice Guidance and Uncertainty Management in National Greenhouse Gas Inventories	Worksheet 4-1, Sheet 1 of 2	Woodbury, J.W. and A. Hashimoto (1993), "Methane Emissions from Livestock Manure." In International Methane Emissions, US Environmental Protection Agency, Climate Change Division, Washington, D.C., U.S.A.	Revised 1996 IPCC Guidelines for National Greenhouse Gas Inventories (Table 4-5 on Page 4.12 of the Reference Manual)	IPCC	2.4	0.273973	Component	AFOLU
43134	4B5 - Camels and Llamas	3.A.2.e - Camels	METHANE	1996 IPCC default	Manure Management Emission Factor	All manure is assumed to be managed in dry manure management systems, including pastures and ranges, drylots, and daily spreading on fields.	Annual Average temperature is greater than 25 C; MCF value used in the estimation is 2%	Climate: Warm; Country: Developed Countries			3.2	kg/head/yr	Equation 4.15 on Page 4.30 of the IPCC Good Practice Guidance and Uncertainty Management in National Greenhouse Gas Inventories	Worksheet 4-1, Sheet 1 of 2	Woodbury, J.W. and A. Hashimoto (1993), "Methane Emissions from Livestock Manure." In International Methane Emissions, US Environmental Protection Agency, Climate Change Division, Washington, D.C., U.S.A.	Revised 1996 IPCC Guidelines for National Greenhouse Gas Inventories (Table 4-5 on Page 4.12 of the Reference Manual)	IPCC	3.2	0.365297	Component	AFOLU
43135	4B5 - Camels and Llamas	3.A.2.e - Camels	METHANE	1996 IPCC default	Manure Management Emission Factor	All manure is assumed to be managed in dry manure management systems, including pastures and ranges, drylots, and daily spreading on fields.	Annual Average temperature is less than 15 C; MCF value used in the estimation is 1%	Climate: Cool; Country: Developing Countries			1.3	kg/head/yr	Equation 4.15 on Page 4.30 of the IPCC Good Practice Guidance and Uncertainty Management in National Greenhouse Gas Inventories	Worksheet 4-1, Sheet 1 of 2	Woodbury, J.W. and A. Hashimoto (1993), "Methane Emissions from Livestock Manure." In International Methane Emissions, US Environmental Protection Agency, Climate Change Division, Washington, D.C., U.S.A.	Revised 1996 IPCC Guidelines for National Greenhouse Gas Inventories (Table 4-5 on Page 4.12 of the Reference Manual)	IPCC	1.3	0.148402	Component	AFOLU
43136	4B5 - Camels and Llamas	3.A.2.e - Camels	METHANE	1996 IPCC default	Manure Management Emission Factor	All manure is assumed to be managed in dry manure management systems, including pastures and ranges, drylots, and daily spreading on fields.	Annual Average temperature is between 15 C and 25 C; MCF value used in the estimation is 1.5 %	Climate: Temp; Country: Developing Countries			1.9	kg/head/yr	Equation 4.15 on Page 4.30 of the IPCC Good Practice Guidance and Uncertainty Management in National Greenhouse Gas Inventories	Worksheet 4-1, Sheet 1 of 2	Woodbury, J.W. and A. Hashimoto (1993), "Methane Emissions from Livestock Manure." In International Methane Emissions, US Environmental Protection Agency, Climate Change Division, Washington, D.C., U.S.A.	Revised 1996 IPCC Guidelines for National Greenhouse Gas Inventories (Table 4-5 on Page 4.12 of the Reference Manual)	IPCC	1.9	0.216895	Component	AFOLU
43137	4B5 - Camels and Llamas	3.A.2.e - Camels	METHANE	1996 IPCC default	Manure Management Emission Factor	All manure is assumed to be managed in dry manure management systems, including pastures and ranges, drylots, and daily spreading on fields.	Annual Average temperature is greater than 25 C; MCF value used in the estimation is 2%	Climate: Warm; Country: Developing Countries			2.6	kg/head/yr	Equation 4.15 on Page 4.30 of the IPCC Good Practice Guidance and Uncertainty Management in National Greenhouse Gas Inventories	Worksheet 4-1, Sheet 1 of 2	Woodbury, J.W. and A. Hashimoto (1993), "Methane Emissions from Livestock Manure." In International Methane Emissions, US Environmental Protection Agency, Climate Change Division, Washington, D.C., U.S.A.	Revised 1996 IPCC Guidelines for National Greenhouse Gas Inventories (Table 4-5 on Page 4.12 of the Reference Manual)	IPCC	2.6	0.296804	Component	AFOLU
43138	4B6 - Horses	3.A.2.f - Horses	METHANE	1996 IPCC default	Manure Management Emission Factor	All manure is assumed to be managed in dry manure management systems, including pastures and ranges, drylots, and daily spreading on fields.	Annual Average temperature is less than 15 C; MCF value used in the estimation is 1%	Climate: Cool; Country: Developed Countries			1.4	kg/head/yr	Equation 4.15 on Page 4.30 of the IPCC Good Practice Guidance and Uncertainty Management in National Greenhouse Gas Inventories	Worksheet 4-1, Sheet 1 of 2	Woodbury, J.W. and A. Hashimoto (1993), "Methane Emissions from Livestock Manure." In International Methane Emissions, US Environmental Protection Agency, Climate Change Division, Washington, D.C., U.S.A.	Revised 1996 IPCC Guidelines for National Greenhouse Gas Inventories (Table 4-5 on Page 4.12 of the Reference Manual)	IPCC	1.4	0.159817	Component	AFOLU
43139	4B6 - Horses	3.A.2.f - Horses	METHANE	1996 IPCC default	Manure Management Emission Factor	All manure is assumed to be managed in dry manure management systems, including pastures and ranges, drylots, and daily spreading on fields.	Annual Average temperature is between 15 C and 25 C; MCF value used in the estimation is 1.5 %	Climate: Temp; Country: Developed Countries			2.1	kg/head/yr	Equation 4.15 on Page 4.30 of the IPCC Good Practice Guidance and Uncertainty Management in National Greenhouse Gas Inventories	Worksheet 4-1, Sheet 1 of 2	Woodbury, J.W. and A. Hashimoto (1993), "Methane Emissions from Livestock Manure." In International Methane Emissions, US Environmental Protection Agency, Climate Change Division, Washington, D.C., U.S.A.	Revised 1996 IPCC Guidelines for National Greenhouse Gas Inventories (Table 4-5 on Page 4.12 of the Reference Manual)	IPCC	2.1	0.239726	Component	AFOLU
43140	4B6 - Horses	3.A.2.f - Horses	METHANE	1996 IPCC default	Manure Management Emission Factor	All manure is assumed to be managed in dry manure management systems, including pastures and ranges, drylots, and daily spreading on fields.	Annual Average temperature is greater than 25 C; MCF value used in the estimation is 2%	Climate: Warm; Country: Developed Countries			2.8	kg/head/yr	Equation 4.15 on Page 4.30 of the IPCC Good Practice Guidance and Uncertainty Management in National Greenhouse Gas Inventories	Worksheet 4-1, Sheet 1 of 2	Woodbury, J.W. and A. Hashimoto (1993), "Methane Emissions from Livestock Manure." In International Methane Emissions, US Environmental Protection Agency, Climate Change Division, Washington, D.C., U.S.A.	Revised 1996 IPCC Guidelines for National Greenhouse Gas Inventories (Table 4-5 on Page 4.12 of the Reference Manual)	IPCC	2.8	0.319635	Component	AFOLU
43141	4B6 - Horses	3.A.2.f - Horses	METHANE	1996 IPCC default	Manure Management Emission Factor	All manure is assumed to be managed in dry manure management systems, including pastures and ranges, drylots, and daily spreading on fields.	Annual Average temperature is less than 15 C; MCF value used in the estimation is 1%	Climate: Cool; Country: Developing Countries			1.1	kg/head/yr	Equation 4.15 on Page 4.30 of the IPCC Good Practice Guidance and Uncertainty Management in National Greenhouse Gas Inventories	Worksheet 4-1, Sheet 1 of 2	Woodbury, J.W. and A. Hashimoto (1993), "Methane Emissions from Livestock Manure." In International Methane Emissions, US Environmental Protection Agency, Climate Change Division, Washington, D.C., U.S.A.	Revised 1996 IPCC Guidelines for National Greenhouse Gas Inventories (Table 4-5 on Page 4.12 of the Reference Manual)	IPCC	1.1	0.125571	Component	AFOLU
43142	4B6 - Horses	3.A.2.f - Horses	METHANE	1996 IPCC default	Manure Management Emission Factor	All manure is assumed to be managed in dry manure management systems, including pastures and ranges, drylots, and daily spreading on fields.	Annual Average temperature is between 15 C and 25 C; MCF value used in the estimation is 1.5 %	Climate: Temp; Country: Developing Countries			1.6	kg/head/yr	Equation 4.15 on Page 4.30 of the IPCC Good Practice Guidance and Uncertainty Management in National Greenhouse Gas Inventories	Worksheet 4-1, Sheet 1 of 2	Woodbury, J.W. and A. Hashimoto (1993), "Methane Emissions from Livestock Manure." In International Methane Emissions, US Environmental Protection Agency, Climate Change Division, Washington, D.C., U.S.A.	Revised 1996 IPCC Guidelines for National Greenhouse Gas Inventories (Table 4-5 on Page 4.12 of the Reference Manual)	IPCC	1.6	0.182648	Component	AFOLU
43143	4B6 - Horses	3.A.2.f - Horses	METHANE	1996 IPCC default	Manure Management Emission Factor	All manure is assumed to be managed in dry manure management systems, including pastures and ranges, drylots, and daily spreading on fields.	Annual Average temperature is greater than 25 C; MCF value used in the estimation is 2%	Climate: Warm; Country: Developing Countries			2.2	kg/head/yr	Equation 4.15 on Page 4.30 of the IPCC Good Practice Guidance and Uncertainty Management in National Greenhouse Gas Inventories	Worksheet 4-1, Sheet 1 of 2	Woodbury, J.W. and A. Hashimoto (1993), "Methane Emissions from Livestock Manure." In International Methane Emissions, US Environmental Protection Agency, Climate Change Division, Washington, D.C., U.S.A.	Revised 1996 IPCC Guidelines for National Greenhouse Gas Inventories (Table 4-5 on Page 4.12 of the Reference Manual)	IPCC	2.2	0.251142	Component	AFOLU
43144	4B7 - Mules and Asses	3.A.2.g - Mules and Asses	METHANE	1996 IPCC default	Manure Management Emission Factor	All manure is assumed to be managed in dry manure management systems, including pastures and ranges, drylots, and daily spreading on fields.	Annual Average temperature is less than 15 C; MCF value used in the estimation is 1%	Climate: Cool; Country: Developed Countries			0.76	kg/head/yr	Equation 4.15 on Page 4.30 of the IPCC Good Practice Guidance and Uncertainty Management in National Greenhouse Gas Inventories	Worksheet 4-1, Sheet 1 of 2	Woodbury, J.W. and A. Hashimoto (1993), "Methane Emissions from Livestock Manure." In International Methane Emissions, US Environmental Protection Agency, Climate Change Division, Washington, D.C., U.S.A.	Revised 1996 IPCC Guidelines for National Greenhouse Gas Inventories (Table 4-5 on Page 4.12 of the Reference Manual)	IPCC	0.76	0.086758	Component	AFOLU
43145	4B7 - Mules and Asses	3.A.2.g - Mules and Asses	METHANE	1996 IPCC default	Manure Management Emission Factor	All manure is assumed to be managed in dry manure management systems, including pastures and ranges, drylots, and daily spreading on fields.	Annual Average temperature is between 15 C and 25 C; MCF value used in the estimation is 1.5 %	Temperate Regions in Developed Countries (average temperature is 15C to 25C inclusive	-	-	1.14	kg/head/yr	Equation 4.15 on Page 4.30 of the IPCC Good Practice Guidance and Uncertainty Management in National Greenhouse Gas Inventories	Worksheet 4-1, Sheet 1 of 2	Woodbury, J.W. and A. Hashimoto (1993), "Methane Emissions from Livestock Manure." In International Methane Emissions, US Environmental Protection Agency, Climate Change Division, Washington, D.C., U.S.A.	Revised 1996 IPCC Guidelines for National Greenhouse Gas Inventories (Table 4-5 on Page 4.12 of the Reference Manual)	IPCC	1.14	0.130137	Component	AFOLU
43146	4B7 - Mules and Asses	3.A.2.g - Mules and Asses	METHANE	1996 IPCC default	Manure Management Emission Factor	All manure is assumed to be managed in dry manure management systems, including pastures and ranges, drylots, and daily spreading on fields.	Annual Average temperature is greater than 25 C; MCF value used in the estimation is 2%	Climate: Warm; Country: Developed Countries			1.51	kg/head/yr	Equation 4.15 on Page 4.30 of the IPCC Good Practice Guidance and Uncertainty Management in National Greenhouse Gas Inventories	Worksheet 4-1, Sheet 1 of 2	Woodbury, J.W. and A. Hashimoto (1993), "Methane Emissions from Livestock Manure." In International Methane Emissions, US Environmental Protection Agency, Climate Change Division, Washington, D.C., U.S.A.	Revised 1996 IPCC Guidelines for National Greenhouse Gas Inventories (Table 4-5 on Page 4.12 of the Reference Manual)	IPCC	1.51	0.172374	Component	AFOLU
43147	4B7 - Mules and Asses	3.A.2.g - Mules and Asses	METHANE	1996 IPCC default	Manure Management Emission Factor	All manure is assumed to be managed in dry manure management systems, including pastures and ranges, drylots, and daily spreading on fields.	Annual Average temperature is less than 15 C; MCF value used in the estimation is 1%	Climate: Cool; Country: Developing Countries			0.60	kg/head/yr	Equation 4.15 on Page 4.30 of the IPCC Good Practice Guidance and Uncertainty Management in National Greenhouse Gas Inventories	Worksheet 4-1, Sheet 1 of 2	Woodbury, J.W. and A. Hashimoto (1993), "Methane Emissions from Livestock Manure." In International Methane Emissions, US Environmental Protection Agency, Climate Change Division, Washington, D.C., U.S.A.	Revised 1996 IPCC Guidelines for National Greenhouse Gas Inventories (Table 4-5 on Page 4.12 of the Reference Manual)	IPCC	0.6	0.0684932	Component	AFOLU
43148	4B7 - Mules and Asses	3.A.2.g - Mules and Asses	METHANE	1996 IPCC default	Manure Management Emission Factor	All manure is assumed to be managed in dry manure management systems, including pastures and ranges, drylots, and daily spreading on fields.	Annual Average temperature is between 15 C and 25 C; MCF value used in the estimation is 1.5 %	Climate: Temp; Country: Developing Countries			0.90	kg/head/yr	Equation 4.15 on Page 4.30 of the IPCC Good Practice Guidance and Uncertainty Management in National Greenhouse Gas Inventories	Worksheet 4-1, Sheet 1 of 2	Woodbury, J.W. and A. Hashimoto (1993), "Methane Emissions from Livestock Manure." In International Methane Emissions, US Environmental Protection Agency, Climate Change Division, Washington, D.C., U.S.A.	Revised 1996 IPCC Guidelines for National Greenhouse Gas Inventories (Table 4-5 on Page 4.12 of the Reference Manual)	IPCC	0.9	0.10274	Component	AFOLU
43149	4B7 - Mules and Asses	3.A.2.g - Mules and Asses	METHANE	1996 IPCC default	Manure Management Emission Factor	All manure is assumed to be managed in dry manure management systems, including pastures and ranges, drylots, and daily spreading on fields.	Annual Average temperature is greater than 25 C; MCF value used in the estimation is 2%	Climate: Warm; Country: Developing Countries			1.2	kg/head/yr	Equation 4.15 on Page 4.30 of the IPCC Good Practice Guidance and Uncertainty Management in National Greenhouse Gas Inventories	Worksheet 4-1, Sheet 1 of 2	Woodbury, J.W. and A. Hashimoto (1993), "Methane Emissions from Livestock Manure." In International Methane Emissions, US Environmental Protection Agency, Climate Change Division, Washington, D.C., U.S.A.	Revised 1996 IPCC Guidelines for National Greenhouse Gas Inventories (Table 4-5 on Page 4.12 of the Reference Manual)	IPCC	1.2	0.136986	Component	AFOLU
43150	4B9 - Poultry	3.A.2.i - Poultry	METHANE	1996 IPCC default	Manure Management Emission Factor	All manure is assumed to be managed in dry manure management systems, including pastures and ranges, drylots, and daily spreading on fields. Include chickens, ducks, and turkeys.	Annual Average temperature is less than 15 C; MCF value used in the estimation is 1%	Climate: Cool; Country: Developed Countries			0.078	kg/head/yr	Equation 4.15 on Page 4.30 of the IPCC Good Practice Guidance and Uncertainty Management in National Greenhouse Gas Inventories	Worksheet 4-1, Sheet 1 of 2	Woodbury, J.W. and A. Hashimoto (1993), "Methane Emissions from Livestock Manure." In International Methane Emissions, US Environmental Protection Agency, Climate Change Division, Washington, D.C., U.S.A.	Revised 1996 IPCC Guidelines for National Greenhouse Gas Inventories (Table 4-5 on Page 4.12 of the Reference Manual)	IPCC	0.078	0.00890411	Component	AFOLU
43151	4B9 - Poultry	3.A.2.i - Poultry	METHANE	1996 IPCC default	Manure Management Emission Factor	All manure is assumed to be managed in dry manure management systems, including pastures and ranges, drylots, and daily spreading on fields. Include chickens, ducks, and turkeys.	Annual Average temperature is between 15 C and 25 C; MCF value used in the estimation is 1.5 %	Climate: Temp; Country: Developed Countries			0.117	kg/head/yr	Equation 4.15 on Page 4.30 of the IPCC Good Practice Guidance and Uncertainty Management in National Greenhouse Gas Inventories	Worksheet 4-1, Sheet 1 of 2	Woodbury, J.W. and A. Hashimoto (1993), "Methane Emissions from Livestock Manure." In International Methane Emissions, US Environmental Protection Agency, Climate Change Division, Washington, D.C., U.S.A.	Revised 1996 IPCC Guidelines for National Greenhouse Gas Inventories (Table 4-5 on Page 4.12 of the Reference Manual)	IPCC	0.117	0.0133562	Component	AFOLU
43152	4B9 - Poultry	3.A.2.i - Poultry	METHANE	1996 IPCC default	Manure Management Emission Factor	All manure is assumed to be managed in dry manure management systems, including pastures and ranges, drylots, and daily spreading on fields. Include chickens, ducks, and turkeys.	Annual Average temperature is greater than 25 C; MCF value used in the estimation is 2%	Climate: Warm; Country: Developed Countries			0.157	kg/head/yr	Equation 4.15 on Page 4.30 of the IPCC Good Practice Guidance and Uncertainty Management in National Greenhouse Gas Inventories	Worksheet 4-1, Sheet 1 of 2	Woodbury, J.W. and A. Hashimoto (1993), "Methane Emissions from Livestock Manure." In International Methane Emissions, US Environmental Protection Agency, Climate Change Division, Washington, D.C., U.S.A.	Revised 1996 IPCC Guidelines for National Greenhouse Gas Inventories (Table 4-5 on Page 4.12 of the Reference Manual)	IPCC	0.157	0.0179224	Component	AFOLU
43153	4B9 - Poultry	3.A.2.i - Poultry	METHANE	1996 IPCC default	Manure Management Emission Factor	All manure is assumed to be managed in dry manure management systems, including pastures and ranges, drylots, and daily spreading on fields. Include chickens, ducks, and turkeys.	Annual Average temperature is less than 15 C; MCF value used in the estimation is 1%	Climate: Cool; Country: Developing Countries			0.012	kg/head/yr	Equation 4.15 on Page 4.30 of the IPCC Good Practice Guidance and Uncertainty Management in National Greenhouse Gas Inventories	Worksheet 4-1, Sheet 1 of 2	Woodbury, J.W. and A. Hashimoto (1993), "Methane Emissions from Livestock Manure." In International Methane Emissions, US Environmental Protection Agency, Climate Change Division, Washington, D.C., U.S.A.	Revised 1996 IPCC Guidelines for National Greenhouse Gas Inventories (Table 4-5 on Page 4.12 of the Reference Manual)	IPCC	0.012	0.00136986	Component	AFOLU
43154	4B9 - Poultry	3.A.2.i - Poultry	METHANE	1996 IPCC default	Manure Management Emission Factor	All manure is assumed to be managed in dry manure management systems, including pastures and ranges, drylots, and daily spreading on fields. Include chickens, ducks, and turkeys.	Annual Average temperature is between 15 C and 25 C; MCF value used in the estimation is 1.5 %	Climate: Temp; Country: Developing Countries			0.018	kg/head/yr	Equation 4.15 on Page 4.30 of the IPCC Good Practice Guidance and Uncertainty Management in National Greenhouse Gas Inventories	Worksheet 4-1, Sheet 1 of 2	Woodbury, J.W. and A. Hashimoto (1993), "Methane Emissions from Livestock Manure." In International Methane Emissions, US Environmental Protection Agency, Climate Change Division, Washington, D.C., U.S.A.	Revised 1996 IPCC Guidelines for National Greenhouse Gas Inventories (Table 4-5 on Page 4.12 of the Reference Manual)	IPCC	0.018	0.00205479	Component	AFOLU
43155	4B9 - Poultry	3.A.2.i - Poultry	METHANE	1996 IPCC default	Manure Management Emission Factor	All manure is assumed to be managed in dry manure management systems, including pastures and ranges, drylots, and daily spreading on fields. Include chickens, ducks, and turkeys.	Annual Average temperature is greater than 25 C; MCF value used in the estimation is 2%	Climate: Warm; Country: Developing Countries			0.023	kg/head/yr	Equation 4.15 on Page 4.30 of the IPCC Good Practice Guidance and Uncertainty Management in National Greenhouse Gas Inventories	Worksheet 4-1, Sheet 1 of 2	Woodbury, J.W. and A. Hashimoto (1993), "Methane Emissions from Livestock Manure." In International Methane Emissions, US Environmental Protection Agency, Climate Change Division, Washington, D.C., U.S.A.	Revised 1996 IPCC Guidelines for National Greenhouse Gas Inventories (Table 4-5 on Page 4.12 of the Reference Manual)	IPCC	0.023	0.00262557	Component	AFOLU
43156	4B1a - Dairy	3.A.2.a.i - Dairy cows	METHANE	1996 IPCC default	Manure Management Emission Factor	Liquid-based systems are commonly used.	Annual Average temperature is less than 15 C	Climate: Cool; Region: North America			36	kg/head/yr	Equation 4.15 on Page 4.30 of the IPCC Good Practice Guidance and Uncertainty Management in National Greenhouse Gas Inventories	Worksheet 4-1, Sheet 1 of 2	Crutzen, P.J., I. Aselmann and W. Seiler (1986), "Methane Production by Domestic Animals, Wild Ruminants, Other Herbivorous Fauna, and Humans," Tellus 38B:271-284 Gibbs, M.J. and D.E. Johnson (1993), "Livestock Emissions." In: International Methane Emissions, US Environmental Protection Agency, Climate Change Division, Washington, D.C., U.S.A Safley, L.M., M.E. Casada, J.W. Woodbury, and K.F. Roo…	Revised 1996 IPCC Guidelines for National Greenhouse Gas Inventories (Table 4-6 on Page 4.13 of the Reference Manual)	IPCC	36	4.10959	Component	AFOLU
43157	4B1a - Dairy	3.A.2.a.i - Dairy cows	METHANE	1996 IPCC default	Manure Management Emission Factor	Liquid-based systems are commonly used.	Annual Average temperature is between 15 C and 25 C	Climate: Temp; Region: North America			54	kg/head/yr	Equation 4.15 on Page 4.30 of the IPCC Good Practice Guidance and Uncertainty Management in National Greenhouse Gas Inventories	Worksheet 4-1, Sheet 1 of 2	Crutzen, P.J., I. Aselmann and W. Seiler (1986), "Methane Production by Domestic Animals, Wild Ruminants, Other Herbivorous Fauna, and Humans," Tellus 38B:271-284 Gibbs, M.J. and D.E. Johnson (1993), "Livestock Emissions." In: International Methane Emissions, US Environmental Protection Agency, Climate Change Division, Washington, D.C., U.S.A Safley, L.M., M.E. Casada, J.W. Woodbury, and K.F. Roo…	Revised 1996 IPCC Guidelines for National Greenhouse Gas Inventories (Table 4-6 on Page 4.13 of the Reference Manual)	IPCC	54	6.16438	Component	AFOLU
43158	4B1a - Dairy	3.A.2.a.i - Dairy cows	METHANE	1996 IPCC default	Manure Management Emission Factor	Liquid-based systems are commonly used.	Annual Average temperature is greater than 25 C	Climate: Warm; Region: North America			76	kg/head/yr	Equation 4.15 on Page 4.30 of the IPCC Good Practice Guidance and Uncertainty Management in National Greenhouse Gas Inventories	Worksheet 4-1, Sheet 1 of 2	Crutzen, P.J., I. Aselmann and W. Seiler (1986), "Methane Production by Domestic Animals, Wild Ruminants, Other Herbivorous Fauna, and Humans," Tellus 38B:271-284 Gibbs, M.J. and D.E. Johnson (1993), "Livestock Emissions." In: International Methane Emissions, US Environmental Protection Agency, Climate Change Division, Washington, D.C., U.S.A Safley, L.M., M.E. Casada, J.W. Woodbury, and K.F. Roo…	Revised 1996 IPCC Guidelines for National Greenhouse Gas Inventories (Table 4-6 on Page 4.13 of the Reference Manual)	IPCC	76	8.6758	Component	AFOLU
43159	4B1b - Non-Dairy	3.A.2.a.ii - Other cattle	METHANE	1996 IPCC default	Manure Management Emission Factor	Non-dairy manure is usually managed as a solid and deposited on pastures or ranges.	Annual Average temperature is less than 15 C	Climate: Cool; Region: North America			1	kg/head/yr	Equation 4.15 on Page 4.30 of the IPCC Good Practice Guidance and Uncertainty Management in National Greenhouse Gas Inventories	Worksheet 4-1, Sheet 1 of 2	Crutzen, P.J., I. Aselmann and W. Seiler (1986), "Methane Production by Domestic Animals, Wild Ruminants, Other Herbivorous Fauna, and Humans," Tellus 38B:271-284 Gibbs, M.J. and D.E. Johnson (1993), "Livestock Emissions." In: International Methane Emissions, US Environmental Protection Agency, Climate Change Division, Washington, D.C., U.S.A Safley, L.M., M.E. Casada, J.W. Woodbury, and K.F. Roo…	Revised 1996 IPCC Guidelines for National Greenhouse Gas Inventories (Table 4-6 on Page 4.13 of the Reference Manual)	IPCC	1	0.114155	Component	AFOLU
43160	4B1b - Non-Dairy	3.A.2.a.ii - Other cattle	METHANE	1996 IPCC default	Manure Management Emission Factor	Non-dairy manure is usually managed as a solid and deposited on pastures or ranges.	Annual Average temperature is between 15 C and 25 C	Climate: Temp; Region: North America			2	kg/head/yr	Equation 4.15 on Page 4.30 of the IPCC Good Practice Guidance and Uncertainty Management in National Greenhouse Gas Inventories	Worksheet 4-1, Sheet 1 of 2	Crutzen, P.J., I. Aselmann and W. Seiler (1986), "Methane Production by Domestic Animals, Wild Ruminants, Other Herbivorous Fauna, and Humans," Tellus 38B:271-284 Gibbs, M.J. and D.E. Johnson (1993), "Livestock Emissions." In: International Methane Emissions, US Environmental Protection Agency, Climate Change Division, Washington, D.C., U.S.A Safley, L.M., M.E. Casada, J.W. Woodbury, and K.F. Roo…	Revised 1996 IPCC Guidelines for National Greenhouse Gas Inventories (Table 4-6 on Page 4.13 of the Reference Manual)	IPCC	2	0.228311	Component	AFOLU
43161	4B1b - Non-Dairy	3.A.2.a.ii - Other cattle	METHANE	1996 IPCC default	Manure Management Emission Factor	Non-dairy manure is usually managed as a solid and deposited on pastures or ranges.	Annual Average temperature is greater than 25 C	Climate: Warm; Region: North America			3	kg/head/yr	Equation 4.15 on Page 4.30 of the IPCC Good Practice Guidance and Uncertainty Management in National Greenhouse Gas Inventories	Worksheet 4-1, Sheet 1 of 2	Crutzen, P.J., I. Aselmann and W. Seiler (1986), "Methane Production by Domestic Animals, Wild Ruminants, Other Herbivorous Fauna, and Humans," Tellus 38B:271-284 Gibbs, M.J. and D.E. Johnson (1993), "Livestock Emissions." In: International Methane Emissions, US Environmental Protection Agency, Climate Change Division, Washington, D.C., U.S.A Safley, L.M., M.E. Casada, J.W. Woodbury, and K.F. Roo…	Revised 1996 IPCC Guidelines for National Greenhouse Gas Inventories (Table 4-6 on Page 4.13 of the Reference Manual)	IPCC	3	0.342466	Component	AFOLU
43162	4B8 - Swine	3.A.2.h - Swine	METHANE	1996 IPCC default	Manure Management Emission Factor	Liquid-based systems are commonly used.	Annual Average temperature is less than 15 C	Climate: Cool; Region: North America			10	kg/head/yr	Equation 4.15 on Page 4.30 of the IPCC Good Practice Guidance and Uncertainty Management in National Greenhouse Gas Inventories	Worksheet 4-1, Sheet 1 of 2	Crutzen, P.J., I. Aselmann and W. Seiler (1986), "Methane Production by Domestic Animals, Wild Ruminants, Other Herbivorous Fauna, and Humans," Tellus 38B:271-284 Safley, L.M., M.E. Casada, J.W. Woodbury, and K.F. Roos (1992), Global Methane Emissions from Livestock and Poultry Manure. US Environmental Protection Agency, Global Change Division, Washington, D.C., February 1992, EPA/400/1091/048. W…	Revised 1996 IPCC Guidelines for National Greenhouse Gas Inventories (Table 4-6 on Page 4.13 of the Reference Manual)	IPCC	10	1.14155	Component	AFOLU
43163	4B8 - Swine	3.A.2.h - Swine	METHANE	1996 IPCC default	Manure Management Emission Factor	Liquid-based systems are commonly used.	Annual Average temperature is between 15 C and 25 C	Climate: Temp; Region: North America			14	kg/head/yr	Equation 4.15 on Page 4.30 of the IPCC Good Practice Guidance and Uncertainty Management in National Greenhouse Gas Inventories	Worksheet 4-1, Sheet 1 of 2	Crutzen, P.J., I. Aselmann and W. Seiler (1986), "Methane Production by Domestic Animals, Wild Ruminants, Other Herbivorous Fauna, and Humans," Tellus 38B:271-284 Safley, L.M., M.E. Casada, J.W. Woodbury, and K.F. Roos (1992), Global Methane Emissions from Livestock and Poultry Manure. US Environmental Protection Agency, Global Change Division, Washington, D.C., February 1992, EPA/400/1091/048. W…	Revised 1996 IPCC Guidelines for National Greenhouse Gas Inventories (Table 4-6 on Page 4.13 of the Reference Manual)	IPCC	14	1.59817	Component	AFOLU
43164	4B8 - Swine	3.A.2.h - Swine	METHANE	1996 IPCC default	Manure Management Emission Factor	Liquid-based systems are commonly used.	Annual Average temperature is greater than 25 C	Climate: Warm; Region: North America			18	kg/head/yr	Equation 4.15 on Page 4.30 of the IPCC Good Practice Guidance and Uncertainty Management in National Greenhouse Gas Inventories	Worksheet 4-1, Sheet 1 of 2	Crutzen, P.J., I. Aselmann and W. Seiler (1986), "Methane Production by Domestic Animals, Wild Ruminants, Other Herbivorous Fauna, and Humans," Tellus 38B:271-284 Safley, L.M., M.E. Casada, J.W. Woodbury, and K.F. Roos (1992), Global Methane Emissions from Livestock and Poultry Manure. US Environmental Protection Agency, Global Change Division, Washington, D.C., February 1992, EPA/400/1091/048. W…	Revised 1996 IPCC Guidelines for National Greenhouse Gas Inventories (Table 4-6 on Page 4.13 of the Reference Manual)	IPCC	18	2.05479	Component	AFOLU
43165	4B1a - Dairy	3.A.2.a.i - Dairy cows	METHANE	1996 IPCC default	Manure Management Emission Factor	Liquid/slurry and pit storage systems are commonly used for manure.Limited cropland is available for spreading manure.	Annual Average temperature is less than 15 C	Climate: Cool; Region: Western Europe			14	kg/head/yr	Equation 4.15 on Page 4.30 of the IPCC Good Practice Guidance and Uncertainty Management in National Greenhouse Gas Inventories	Worksheet 4-1, Sheet 1 of 2	Crutzen, P.J., I. Aselmann and W. Seiler (1986), "Methane Production by Domestic Animals, Wild Ruminants, Other Herbivorous Fauna, and Humans," Tellus 38B:271-284 Gibbs, M.J. and D.E. Johnson (1993), "Livestock Emissions." In: International Methane Emissions, US Environmental Protection Agency, Climate Change Division, Washington, D.C., U.S.A Safley, L.M., M.E. Casada, J.W. Woodbury, and K.F. Roo…	Revised 1996 IPCC Guidelines for National Greenhouse Gas Inventories (Table 4-6 on Page 4.13 of the Reference Manual)	IPCC	14	1.59817	Component	AFOLU
43166	4B1a - Dairy	3.A.2.a.i - Dairy cows	METHANE	1996 IPCC default	Manure Management Emission Factor	Liquid/slurry and pit storage systems are commonly used for manure.Limited cropland is available for spreading manure.	Annual Average temperature is between 15 C and 25 C	Climate: Temp; Region: Western Europe			44	kg/head/yr	Equation 4.15 on Page 4.30 of the IPCC Good Practice Guidance and Uncertainty Management in National Greenhouse Gas Inventories	Worksheet 4-1, Sheet 1 of 2	Crutzen, P.J., I. Aselmann and W. Seiler (1986), "Methane Production by Domestic Animals, Wild Ruminants, Other Herbivorous Fauna, and Humans," Tellus 38B:271-284 Gibbs, M.J. and D.E. Johnson (1993), "Livestock Emissions." In: International Methane Emissions, US Environmental Protection Agency, Climate Change Division, Washington, D.C., U.S.A Safley, L.M., M.E. Casada, J.W. Woodbury, and K.F. Roo…	Revised 1996 IPCC Guidelines for National Greenhouse Gas Inventories (Table 4-6 on Page 4.13 of the Reference Manual)	IPCC	44	5.02283	Component	AFOLU
43167	4B1a - Dairy	3.A.2.a.i - Dairy cows	METHANE	1996 IPCC default	Manure Management Emission Factor	Liquid/slurry and pit storage systems are commonly used for manure.Limited cropland is available for spreading manure.	Annual Average temperature is greater than 25 C	Climate: Warm; Region: Western Europe			81	kg/head/yr	Equation 4.15 on Page 4.30 of the IPCC Good Practice Guidance and Uncertainty Management in National Greenhouse Gas Inventories	Worksheet 4-1, Sheet 1 of 2	Crutzen, P.J., I. Aselmann and W. Seiler (1986), "Methane Production by Domestic Animals, Wild Ruminants, Other Herbivorous Fauna, and Humans," Tellus 38B:271-284 Gibbs, M.J. and D.E. Johnson (1993), "Livestock Emissions." In: International Methane Emissions, US Environmental Protection Agency, Climate Change Division, Washington, D.C., U.S.A Safley, L.M., M.E. Casada, J.W. Woodbury, and K.F. Roo…	Revised 1996 IPCC Guidelines for National Greenhouse Gas Inventories (Table 4-6 on Page 4.13 of the Reference Manual)	IPCC	81	9.24658	Component	AFOLU
43168	4B1b - Non-Dairy	3.A.2.a.ii - Other cattle	METHANE	1996 IPCC default	Manure Management Emission Factor	Liquid/slurry and pit storage systems are commonly used for manure.Limited cropland is available for spreading manure.	Annual Average temperature is less than 15 C	Climate: Cool; Region: Western Europe			6	kg/head/yr	Equation 4.15 on Page 4.30 of the IPCC Good Practice Guidance and Uncertainty Management in National Greenhouse Gas Inventories	Worksheet 4-1, Sheet 1 of 2	Crutzen, P.J., I. Aselmann and W. Seiler (1986), "Methane Production by Domestic Animals, Wild Ruminants, Other Herbivorous Fauna, and Humans," Tellus 38B:271-284 Gibbs, M.J. and D.E. Johnson (1993), "Livestock Emissions." In: International Methane Emissions, US Environmental Protection Agency, Climate Change Division, Washington, D.C., U.S.A Safley, L.M., M.E. Casada, J.W. Woodbury, and K.F. Roo…	Revised 1996 IPCC Guidelines for National Greenhouse Gas Inventories (Table 4-6 on Page 4.13 of the Reference Manual)	IPCC	6	0.684932	Component	AFOLU
43169	4B1b - Non-Dairy	3.A.2.a.ii - Other cattle	METHANE	1996 IPCC default	Manure Management Emission Factor	Liquid/slurry and pit storage systems are commonly used for manure.Limited cropland is available for spreading manure.	Annual Average temperature is between 15 C and 25 C	Climate: Temp; Region: Western Europe	-	-	20	kg/head/yr	Equation 4.15 on Page 4.30 of the IPCC Good Practice Guidance and Uncertainty Management in National Greenhouse Gas Inventories	Worksheet 4-1, Sheet 1 of 2	Crutzen, P.J., I. Aselmann and W. Seiler (1986), "Methane Production by Domestic Animals, Wild Ruminants, Other Herbivorous Fauna, and Humans," Tellus 38B:271-284 Gibbs, M.J. and D.E. Johnson (1993), "Livestock Emissions." In: International Methane Emissions, US Environmental Protection Agency, Climate Change Division, Washington, D.C., U.S.A Safley, L.M., M.E. Casada, J.W. Woodbury, and K.F. Roo…	Revised 1996 IPCC Guidelines for National Greenhouse Gas Inventories (Table 4-6 on Page 4.13 of the Reference Manual)	IPCC	20	2.28311	Component	AFOLU
43170	4B1b - Non-Dairy	3.A.2.a.ii - Other cattle	METHANE	1996 IPCC default	Manure Management Emission Factor	Liquid/slurry and pit storage systems are commonly used for manure.Limited cropland is available for spreading manure.	Annual Average temperature is greater than 25 C	Climate: Warm; Region: Western Europe			38	kg/head/yr	Equation 4.15 on Page 4.30 of the IPCC Good Practice Guidance and Uncertainty Management in National Greenhouse Gas Inventories	Worksheet 4-1, Sheet 1 of 2	Crutzen, P.J., I. Aselmann and W. Seiler (1986), "Methane Production by Domestic Animals, Wild Ruminants, Other Herbivorous Fauna, and Humans," Tellus 38B:271-284 Gibbs, M.J. and D.E. Johnson (1993), "Livestock Emissions." In: International Methane Emissions, US Environmental Protection Agency, Climate Change Division, Washington, D.C., U.S.A Safley, L.M., M.E. Casada, J.W. Woodbury, and K.F. Roo…	Revised 1996 IPCC Guidelines for National Greenhouse Gas Inventories (Table 4-6 on Page 4.13 of the Reference Manual)	IPCC	38	4.3379	Component	AFOLU
43171	4B8 - Swine	3.A.2.h - Swine	METHANE	1996 IPCC default	Manure Management Emission Factor	Liquid/slurry and pit storage systems are commonly used for manure.Limited cropland is available for spreading manure.	Annual Average temperature is less than 15 C	Climate: Cool; Region: Western Europe			3	kg/head/yr	Equation 4.15 on Page 4.30 of the IPCC Good Practice Guidance and Uncertainty Management in National Greenhouse Gas Inventories	Worksheet 4-1, Sheet 1 of 2	Crutzen, P.J., I. Aselmann and W. Seiler (1986), "Methane Production by Domestic Animals, Wild Ruminants, Other Herbivorous Fauna, and Humans," Tellus 38B:271-284 Safley, L.M., M.E. Casada, J.W. Woodbury, and K.F. Roos (1992), Global Methane Emissions from Livestock and Poultry Manure. US Environmental Protection Agency, Global Change Division, Washington, D.C., February 1992, EPA/400/1091/048. W…	Revised 1996 IPCC Guidelines for National Greenhouse Gas Inventories (Table 4-6 on Page 4.13 of the Reference Manual)	IPCC	3	0.342466	Component	AFOLU
43172	4B8 - Swine	3.A.2.h - Swine	METHANE	1996 IPCC default	Manure Management Emission Factor	Liquid/slurry and pit storage systems are commonly used for manure.Limited cropland is available for spreading manure.	Annual Average temperature is between 15 C and 25 C	Climate: Temp; Region: Western Europe			10	kg/head/yr	Equation 4.15 on Page 4.30 of the IPCC Good Practice Guidance and Uncertainty Management in National Greenhouse Gas Inventories	Worksheet 4-1, Sheet 1 of 2	Crutzen, P.J., I. Aselmann and W. Seiler (1986), "Methane Production by Domestic Animals, Wild Ruminants, Other Herbivorous Fauna, and Humans," Tellus 38B:271-284 Safley, L.M., M.E. Casada, J.W. Woodbury, and K.F. Roos (1992), Global Methane Emissions from Livestock and Poultry Manure. US Environmental Protection Agency, Global Change Division, Washington, D.C., February 1992, EPA/400/1091/048. W…	Revised 1996 IPCC Guidelines for National Greenhouse Gas Inventories (Table 4-6 on Page 4.13 of the Reference Manual)	IPCC	10	1.14155	Component	AFOLU
43173	4B8 - Swine	3.A.2.h - Swine	METHANE	1996 IPCC default	Manure Management Emission Factor	Liquid/slurry and pit storage systems are commonly used for manure.Limited cropland is available for spreading manure.	Annual Average temperature is greater than 25 C	Climate: Warm; Region: Western Europe			19	kg/head/yr	Equation 4.15 on Page 4.30 of the IPCC Good Practice Guidance and Uncertainty Management in National Greenhouse Gas Inventories	Worksheet 4-1, Sheet 1 of 2	Crutzen, P.J., I. Aselmann and W. Seiler (1986), "Methane Production by Domestic Animals, Wild Ruminants, Other Herbivorous Fauna, and Humans," Tellus 38B:271-284 Safley, L.M., M.E. Casada, J.W. Woodbury, and K.F. Roos (1992), Global Methane Emissions from Livestock and Poultry Manure. US Environmental Protection Agency, Global Change Division, Washington, D.C., February 1992, EPA/400/1091/048. W…	Revised 1996 IPCC Guidelines for National Greenhouse Gas Inventories (Table 4-6 on Page 4.13 of the Reference Manual)	IPCC	19	2.16895	Component	AFOLU
43174	4B2 - Buffalo	3.A.2.b - Buffalo	METHANE	1996 IPCC default	Manure Management Emission Factor	Limited cropland is available for spreading manure.	Annual Average temperature is less than 15 C	Climate: Cool; Region: Western Europe			3	kg/head/yr	Equation 4.15 on Page 4.30 of the IPCC Good Practice Guidance and Uncertainty Management in National Greenhouse Gas Inventories	Worksheet 4-1, Sheet 1 of 2	Crutzen, P.J., I. Aselmann and W. Seiler (1986), "Methane Production by Domestic Animals, Wild Ruminants, Other Herbivorous Fauna, and Humans," Tellus 38B:271-284 Gibbs, M.J. and D.E. Johnson (1993), "Livestock Emissions." In: International Methane Emissions, US Environmental Protection Agency, Climate Change Division, Washington, D.C., U.S.A Safley, L.M., M.E. Casada, J.W. Woodbury, and K.F. Roo…	Revised 1996 IPCC Guidelines for National Greenhouse Gas Inventories (Table 4-6 on Page 4.13 of the Reference Manual)	IPCC	3	0.342466	Component	AFOLU
43175	4B2 - Buffalo	3.A.2.b - Buffalo	METHANE	1996 IPCC default	Manure Management Emission Factor	Limited cropland is available for spreading manure.	Annual Average temperature is between 15 C and 25 C	Climate: Temp; Region: Western Europe			8	kg/head/yr	Equation 4.15 on Page 4.30 of the IPCC Good Practice Guidance and Uncertainty Management in National Greenhouse Gas Inventories	Worksheet 4-1, Sheet 1 of 2	Crutzen, P.J., I. Aselmann and W. Seiler (1986), "Methane Production by Domestic Animals, Wild Ruminants, Other Herbivorous Fauna, and Humans," Tellus 38B:271-284 Gibbs, M.J. and D.E. Johnson (1993), "Livestock Emissions." In: International Methane Emissions, US Environmental Protection Agency, Climate Change Division, Washington, D.C., U.S.A Safley, L.M., M.E. Casada, J.W. Woodbury, and K.F. Roo…	Revised 1996 IPCC Guidelines for National Greenhouse Gas Inventories (Table 4-6 on Page 4.13 of the Reference Manual)	IPCC	8	0.913242	Component	AFOLU
43176	4B2 - Buffalo	3.A.2.b - Buffalo	METHANE	1996 IPCC default	Manure Management Emission Factor	Limited cropland is available for spreading manure.	Annual Average temperature is greater than 25 C	Climate: Warm; Region: Western Europe			17	kg/head/yr	Equation 4.15 on Page 4.30 of the IPCC Good Practice Guidance and Uncertainty Management in National Greenhouse Gas Inventories	Worksheet 4-1, Sheet 1 of 2	Crutzen, P.J., I. Aselmann and W. Seiler (1986), "Methane Production by Domestic Animals, Wild Ruminants, Other Herbivorous Fauna, and Humans," Tellus 38B:271-284 Gibbs, M.J. and D.E. Johnson (1993), "Livestock Emissions." In: International Methane Emissions, US Environmental Protection Agency, Climate Change Division, Washington, D.C., U.S.A Safley, L.M., M.E. Casada, J.W. Woodbury, and K.F. Roo…	Revised 1996 IPCC Guidelines for National Greenhouse Gas Inventories (Table 4-6 on Page 4.13 of the Reference Manual)	IPCC	17	1.94064	Component	AFOLU
43177	4B1a - Dairy	3.A.2.a.i - Dairy cows	METHANE	1996 IPCC default	Manure Management Emission Factor	Solid based systems are used for the majority of manure. About one -third of livestock manure is managed in liquid-based systems.	Annual Average temperature is less than 15 C	Climate: Cool; Region: Eastern Europe			6	kg/head/yr	Equation 4.15 on Page 4.30 of the IPCC Good Practice Guidance and Uncertainty Management in National Greenhouse Gas Inventories	Worksheet 4-1, Sheet 1 of 2	Crutzen, P.J., I. Aselmann and W. Seiler (1986), "Methane Production by Domestic Animals, Wild Ruminants, Other Herbivorous Fauna, and Humans," Tellus 38B:271-284 Gibbs, M.J. and D.E. Johnson (1993), "Livestock Emissions." In: International Methane Emissions, US Environmental Protection Agency, Climate Change Division, Washington, D.C., U.S.A Safley, L.M., M.E. Casada, J.W. Woodbury, and K.F. Roo…	Revised 1996 IPCC Guidelines for National Greenhouse Gas Inventories (Table 4-6 on Page 4.13 of the Reference Manual)	IPCC	6	0.684932	Component	AFOLU
43178	4B1a - Dairy	3.A.2.a.i - Dairy cows	METHANE	1996 IPCC default	Manure Management Emission Factor	Solid based systems are used for the majority of manure. About one -third of livestock manure is managed in liquid-based systems.	Annual Average temperature is between 15 C and 25 C	Climate: Temp; Region: Eastern Europe			19	kg/head/yr	Equation 4.15 on Page 4.30 of the IPCC Good Practice Guidance and Uncertainty Management in National Greenhouse Gas Inventories	Worksheet 4-1, Sheet 1 of 2	Crutzen, P.J., I. Aselmann and W. Seiler (1986), "Methane Production by Domestic Animals, Wild Ruminants, Other Herbivorous Fauna, and Humans," Tellus 38B:271-284 Gibbs, M.J. and D.E. Johnson (1993), "Livestock Emissions." In: International Methane Emissions, US Environmental Protection Agency, Climate Change Division, Washington, D.C., U.S.A Safley, L.M., M.E. Casada, J.W. Woodbury, and K.F. Roo…	Revised 1996 IPCC Guidelines for National Greenhouse Gas Inventories (Table 4-6 on Page 4.13 of the Reference Manual)	IPCC	19	2.16895	Component	AFOLU
43179	4B1a - Dairy	3.A.2.a.i - Dairy cows	METHANE	1996 IPCC default	Manure Management Emission Factor	Solid based systems are used for the majority of manure. About one -third of livestock manure is managed in liquid-based systems.	Annual Average temperature is greater than 25 C	Climate: Warm; Region: Eastern Europe			33	kg/head/yr	Equation 4.15 on Page 4.30 of the IPCC Good Practice Guidance and Uncertainty Management in National Greenhouse Gas Inventories	Worksheet 4-1, Sheet 1 of 2	Crutzen, P.J., I. Aselmann and W. Seiler (1986), "Methane Production by Domestic Animals, Wild Ruminants, Other Herbivorous Fauna, and Humans," Tellus 38B:271-284 Gibbs, M.J. and D.E. Johnson (1993), "Livestock Emissions." In: International Methane Emissions, US Environmental Protection Agency, Climate Change Division, Washington, D.C., U.S.A Safley, L.M., M.E. Casada, J.W. Woodbury, and K.F. Roo…	Revised 1996 IPCC Guidelines for National Greenhouse Gas Inventories (Table 4-6 on Page 4.13 of the Reference Manual)	IPCC	33	3.76712	Component	AFOLU
43180	4B1b - Non-Dairy	3.A.2.a.ii - Other cattle	METHANE	1996 IPCC default	Manure Management Emission Factor	Solid based systems are used for the majority of manure. About one -third of livestock manure is managed in liquid-based systems.	Annual Average temperature is less than 15 C	Climate: Cool; Region: Eastern Europe			4	kg/head/yr	Equation 4.15 on Page 4.30 of the IPCC Good Practice Guidance and Uncertainty Management in National Greenhouse Gas Inventories	Worksheet 4-1, Sheet 1 of 2	Crutzen, P.J., I. Aselmann and W. Seiler (1986), "Methane Production by Domestic Animals, Wild Ruminants, Other Herbivorous Fauna, and Humans," Tellus 38B:271-284 Gibbs, M.J. and D.E. Johnson (1993), "Livestock Emissions." In: International Methane Emissions, US Environmental Protection Agency, Climate Change Division, Washington, D.C., U.S.A Safley, L.M., M.E. Casada, J.W. Woodbury, and K.F. Roo…	Revised 1996 IPCC Guidelines for National Greenhouse Gas Inventories (Table 4-6 on Page 4.13 of the Reference Manual)	IPCC	4	0.456621	Component	AFOLU
43181	4B1b - Non-Dairy	3.A.2.a.ii - Other cattle	METHANE	1996 IPCC default	Manure Management Emission Factor	Solid based systems are used for the majority of manure. About one -third of livestock manure is managed in liquid-based systems.	Annual Average temperature is between 15 C and 25 C	Climate: Temp; Region: Eastern Europe			13	kg/head/yr	Equation 4.15 on Page 4.30 of the IPCC Good Practice Guidance and Uncertainty Management in National Greenhouse Gas Inventories	Worksheet 4-1, Sheet 1 of 2	Crutzen, P.J., I. Aselmann and W. Seiler (1986), "Methane Production by Domestic Animals, Wild Ruminants, Other Herbivorous Fauna, and Humans," Tellus 38B:271-284 Gibbs, M.J. and D.E. Johnson (1993), "Livestock Emissions." In: International Methane Emissions, US Environmental Protection Agency, Climate Change Division, Washington, D.C., U.S.A Safley, L.M., M.E. Casada, J.W. Woodbury, and K.F. Roo…	Revised 1996 IPCC Guidelines for National Greenhouse Gas Inventories (Table 4-6 on Page 4.13 of the Reference Manual)	IPCC	13	1.48402	Component	AFOLU
43182	4B1b - Non-Dairy	3.A.2.a.ii - Other cattle	METHANE	1996 IPCC default	Manure Management Emission Factor	Solid based systems are used for the majority of manure. About one -third of livestock manure is managed in liquid-based systems.	Annual Average temperature is greater than 25 C	Climate: Warm; Region: Eastern Europe			23	kg/head/yr	Equation 4.15 on Page 4.30 of the IPCC Good Practice Guidance and Uncertainty Management in National Greenhouse Gas Inventories	Worksheet 4-1, Sheet 1 of 2	Crutzen, P.J., I. Aselmann and W. Seiler (1986), "Methane Production by Domestic Animals, Wild Ruminants, Other Herbivorous Fauna, and Humans," Tellus 38B:271-284 Gibbs, M.J. and D.E. Johnson (1993), "Livestock Emissions." In: International Methane Emissions, US Environmental Protection Agency, Climate Change Division, Washington, D.C., U.S.A Safley, L.M., M.E. Casada, J.W. Woodbury, and K.F. Roo…	Revised 1996 IPCC Guidelines for National Greenhouse Gas Inventories (Table 4-6 on Page 4.13 of the Reference Manual)	IPCC	23	2.62557	Component	AFOLU
43183	4B8 - Swine	3.A.2.h - Swine	METHANE	1996 IPCC default	Manure Management Emission Factor	Solid based systems are used for the majority of manure. About one -third of livestock manure is managed in liquid-based systems.	Annual Average temperature is less than 15 C	Climate: Cool; Region: Eastern Europe			4	kg/head/yr	Equation 4.15 on Page 4.30 of the IPCC Good Practice Guidance and Uncertainty Management in National Greenhouse Gas Inventories	Worksheet 4-1, Sheet 1 of 2	Crutzen, P.J., I. Aselmann and W. Seiler (1986), "Methane Production by Domestic Animals, Wild Ruminants, Other Herbivorous Fauna, and Humans," Tellus 38B:271-284 Safley, L.M., M.E. Casada, J.W. Woodbury, and K.F. Roos (1992), Global Methane Emissions from Livestock and Poultry Manure. US Environmental Protection Agency, Global Change Division, Washington, D.C., February 1992, EPA/400/1091/048. W…	Revised 1996 IPCC Guidelines for National Greenhouse Gas Inventories (Table 4-6 on Page 4.13 of the Reference Manual)	IPCC	4	0.456621	Component	AFOLU
43184	4B8 - Swine	3.A.2.h - Swine	METHANE	1996 IPCC default	Manure Management Emission Factor	Solid based systems are used for the majority of manure. About one -third of livestock manure is managed in liquid-based systems.	Annual Average temperature is between 15 C and 25 C	Climate: Temp; Region: Eastern Europe			7	kg/head/yr	Equation 4.15 on Page 4.30 of the IPCC Good Practice Guidance and Uncertainty Management in National Greenhouse Gas Inventories	Worksheet 4-1, Sheet 1 of 2	Crutzen, P.J., I. Aselmann and W. Seiler (1986), "Methane Production by Domestic Animals, Wild Ruminants, Other Herbivorous Fauna, and Humans," Tellus 38B:271-284 Safley, L.M., M.E. Casada, J.W. Woodbury, and K.F. Roos (1992), Global Methane Emissions from Livestock and Poultry Manure. US Environmental Protection Agency, Global Change Division, Washington, D.C., February 1992, EPA/400/1091/048. W…	Revised 1996 IPCC Guidelines for National Greenhouse Gas Inventories (Table 4-6 on Page 4.13 of the Reference Manual)	IPCC	7	0.799087	Component	AFOLU
43185	4B8 - Swine	3.A.2.h - Swine	METHANE	1996 IPCC default	Manure Management Emission Factor	Solid based systems are used for the majority of manure. About one -third of livestock manure is managed in liquid-based systems.	Annual Average temperature is greater than 25 C	Climate: Warm; Region: Eastern Europe			11	kg/head/yr	Equation 4.15 on Page 4.30 of the IPCC Good Practice Guidance and Uncertainty Management in National Greenhouse Gas Inventories	Worksheet 4-1, Sheet 1 of 2	Crutzen, P.J., I. Aselmann and W. Seiler (1986), "Methane Production by Domestic Animals, Wild Ruminants, Other Herbivorous Fauna, and Humans," Tellus 38B:271-284 Safley, L.M., M.E. Casada, J.W. Woodbury, and K.F. Roos (1992), Global Methane Emissions from Livestock and Poultry Manure. US Environmental Protection Agency, Global Change Division, Washington, D.C., February 1992, EPA/400/1091/048. W…	Revised 1996 IPCC Guidelines for National Greenhouse Gas Inventories (Table 4-6 on Page 4.13 of the Reference Manual)	IPCC	11	1.25571	Component	AFOLU
43186	4B2 - Buffalo	3.A.2.b - Buffalo	METHANE	1996 IPCC default	Manure Management Emission Factor	Solid based systems are used for the majority of manure. About one -third of livestock manure is managed in liquid-based systems.	Annual Average temperature is less than 15 C	Climate: Cool; Region: Eastern Europe			3	kg/head/yr	Equation 4.15 on Page 4.30 of the IPCC Good Practice Guidance and Uncertainty Management in National Greenhouse Gas Inventories	Worksheet 4-1, Sheet 1 of 2	Crutzen, P.J., I. Aselmann and W. Seiler (1986), "Methane Production by Domestic Animals, Wild Ruminants, Other Herbivorous Fauna, and Humans," Tellus 38B:271-284 Gibbs, M.J. and D.E. Johnson (1993), "Livestock Emissions." In: International Methane Emissions, US Environmental Protection Agency, Climate Change Division, Washington, D.C., U.S.A Safley, L.M., M.E. Casada, J.W. Woodbury, and K.F. Roo…	Revised 1996 IPCC Guidelines for National Greenhouse Gas Inventories (Table 4-6 on Page 4.13 of the Reference Manual)	IPCC	3	0.342466	Component	AFOLU
43187	4B2 - Buffalo	3.A.2.b - Buffalo	METHANE	1996 IPCC default	Manure Management Emission Factor	Solid based systems are used for the majority of manure. About one -third of livestock manure is managed in liquid-based systems.	Annual Average temperature is between 15 C and 25 C	Climate: Temp; Region: Eastern Europe			9	kg/head/yr	Equation 4.15 on Page 4.30 of the IPCC Good Practice Guidance and Uncertainty Management in National Greenhouse Gas Inventories	Worksheet 4-1, Sheet 1 of 2	Crutzen, P.J., I. Aselmann and W. Seiler (1986), "Methane Production by Domestic Animals, Wild Ruminants, Other Herbivorous Fauna, and Humans," Tellus 38B:271-284 Gibbs, M.J. and D.E. Johnson (1993), "Livestock Emissions." In: International Methane Emissions, US Environmental Protection Agency, Climate Change Division, Washington, D.C., U.S.A Safley, L.M., M.E. Casada, J.W. Woodbury, and K.F. Roo…	Revised 1996 IPCC Guidelines for National Greenhouse Gas Inventories (Table 4-6 on Page 4.13 of the Reference Manual)	IPCC	9	1.0274	Component	AFOLU
43188	4B2 - Buffalo	3.A.2.b - Buffalo	METHANE	1996 IPCC default	Manure Management Emission Factor	Solid based systems are used for the majority of manure. About one -third of livestock manure is managed in liquid-based systems.	Annual Average temperature is greater than 25 C	Climate: Warm; Region: Eastern Europe			16	kg/head/yr	Equation 4.15 on Page 4.30 of the IPCC Good Practice Guidance and Uncertainty Management in National Greenhouse Gas Inventories	Worksheet 4-1, Sheet 1 of 2	Crutzen, P.J., I. Aselmann and W. Seiler (1986), "Methane Production by Domestic Animals, Wild Ruminants, Other Herbivorous Fauna, and Humans," Tellus 38B:271-284 Gibbs, M.J. and D.E. Johnson (1993), "Livestock Emissions." In: International Methane Emissions, US Environmental Protection Agency, Climate Change Division, Washington, D.C., U.S.A Safley, L.M., M.E. Casada, J.W. Woodbury, and K.F. Roo…	Revised 1996 IPCC Guidelines for National Greenhouse Gas Inventories (Table 4-6 on Page 4.13 of the Reference Manual)	IPCC	16	1.82648	Component	AFOLU
43189	4B1a - Dairy	3.A.2.a.i - Dairy cows	METHANE	1996 IPCC default	Manure Management Emission Factor	Virtually all livestock manure is managed as a solid on pastures and ranges.	Annual Average temperature is less than 15 C	Climate: Cool; Region: Oceania			31	kg/head/yr	Equation 4.15 on Page 4.30 of the IPCC Good Practice Guidance and Uncertainty Management in National Greenhouse Gas Inventories	Worksheet 4-1, Sheet 1 of 2	Crutzen, P.J., I. Aselmann and W. Seiler (1986), "Methane Production by Domestic Animals, Wild Ruminants, Other Herbivorous Fauna, and Humans," Tellus 38B:271-284 Gibbs, M.J. and D.E. Johnson (1993), "Livestock Emissions." In: International Methane Emissions, US Environmental Protection Agency, Climate Change Division, Washington, D.C., U.S.A Safley, L.M., M.E. Casada, J.W. Woodbury, and K.F. Roo…	Revised 1996 IPCC Guidelines for National Greenhouse Gas Inventories (Table 4-6 on Page 4.13 of the Reference Manual)	IPCC	31	3.53881	Component	AFOLU
43190	4B1a - Dairy	3.A.2.a.i - Dairy cows	METHANE	1996 IPCC default	Manure Management Emission Factor	Virtually all livestock manure is managed as a solid on pastures and ranges.	Annual Average temperature is between 15 C and 25 C	Climate: Temp; Region: Oceania			32	kg/head/yr	Equation 4.15 on Page 4.30 of the IPCC Good Practice Guidance and Uncertainty Management in National Greenhouse Gas Inventories	Worksheet 4-1, Sheet 1 of 2	Crutzen, P.J., I. Aselmann and W. Seiler (1986), "Methane Production by Domestic Animals, Wild Ruminants, Other Herbivorous Fauna, and Humans," Tellus 38B:271-284 Gibbs, M.J. and D.E. Johnson (1993), "Livestock Emissions." In: International Methane Emissions, US Environmental Protection Agency, Climate Change Division, Washington, D.C., U.S.A Safley, L.M., M.E. Casada, J.W. Woodbury, and K.F. Roo…	Revised 1996 IPCC Guidelines for National Greenhouse Gas Inventories (Table 4-6 on Page 4.13 of the Reference Manual)	IPCC	32	3.65297	Component	AFOLU
43191	4B1a - Dairy	3.A.2.a.i - Dairy cows	METHANE	1996 IPCC default	Manure Management Emission Factor	Virtually all livestock manure is managed as a solid on pastures and ranges.	Annual Average temperature is greater than 25 C	Climate: Warm; Region: Oceania			33	kg/head/yr	Equation 4.15 on Page 4.30 of the IPCC Good Practice Guidance and Uncertainty Management in National Greenhouse Gas Inventories	Worksheet 4-1, Sheet 1 of 2	Crutzen, P.J., I. Aselmann and W. Seiler (1986), "Methane Production by Domestic Animals, Wild Ruminants, Other Herbivorous Fauna, and Humans," Tellus 38B:271-284 Gibbs, M.J. and D.E. Johnson (1993), "Livestock Emissions." In: International Methane Emissions, US Environmental Protection Agency, Climate Change Division, Washington, D.C., U.S.A Safley, L.M., M.E. Casada, J.W. Woodbury, and K.F. Roo…	Revised 1996 IPCC Guidelines for National Greenhouse Gas Inventories (Table 4-6 on Page 4.13 of the Reference Manual)	IPCC	33	3.76712	Component	AFOLU
43192	4B1b - Non-Dairy	3.A.2.a.ii - Other cattle	METHANE	1996 IPCC default	Manure Management Emission Factor	Virtually all livestock manure is managed as a solid on pastures and ranges.	Annual Average temperature is less than 15 C	Climate: Cool; Region: Oceania			5	kg/head/yr	Equation 4.15 on Page 4.30 of the IPCC Good Practice Guidance and Uncertainty Management in National Greenhouse Gas Inventories	Worksheet 4-1, Sheet 1 of 2	Crutzen, P.J., I. Aselmann and W. Seiler (1986), "Methane Production by Domestic Animals, Wild Ruminants, Other Herbivorous Fauna, and Humans," Tellus 38B:271-284 Gibbs, M.J. and D.E. Johnson (1993), "Livestock Emissions." In: International Methane Emissions, US Environmental Protection Agency, Climate Change Division, Washington, D.C., U.S.A Safley, L.M., M.E. Casada, J.W. Woodbury, and K.F. Roo…	Revised 1996 IPCC Guidelines for National Greenhouse Gas Inventories (Table 4-6 on Page 4.13 of the Reference Manual)	IPCC	5	0.570776	Component	AFOLU
43193	4B1b - Non-Dairy	3.A.2.a.ii - Other cattle	METHANE	1996 IPCC default	Manure Management Emission Factor	Virtually all livestock manure is managed as a solid on pastures and ranges.	Annual Average temperature is between 15 C and 25 C	Climate: Temp; Region: Oceania			6	kg/head/yr	Equation 4.15 on Page 4.30 of the IPCC Good Practice Guidance and Uncertainty Management in National Greenhouse Gas Inventories	Worksheet 4-1, Sheet 1 of 2	Crutzen, P.J., I. Aselmann and W. Seiler (1986), "Methane Production by Domestic Animals, Wild Ruminants, Other Herbivorous Fauna, and Humans," Tellus 38B:271-284 Gibbs, M.J. and D.E. Johnson (1993), "Livestock Emissions." In: International Methane Emissions, US Environmental Protection Agency, Climate Change Division, Washington, D.C., U.S.A Safley, L.M., M.E. Casada, J.W. Woodbury, and K.F. Roo…	Revised 1996 IPCC Guidelines for National Greenhouse Gas Inventories (Table 4-6 on Page 4.13 of the Reference Manual)	IPCC	6	0.684932	Component	AFOLU
43194	4B1b - Non-Dairy	3.A.2.a.ii - Other cattle	METHANE	1996 IPCC default	Manure Management Emission Factor	Virtually all livestock manure is managed as a solid on pastures and ranges.	Annual Average temperature is greater than 25 C	Climate: Warm; Region: Oceania			7	kg/head/yr	Equation 4.15 on Page 4.30 of the IPCC Good Practice Guidance and Uncertainty Management in National Greenhouse Gas Inventories	Worksheet 4-1, Sheet 1 of 2	Crutzen, P.J., I. Aselmann and W. Seiler (1986), "Methane Production by Domestic Animals, Wild Ruminants, Other Herbivorous Fauna, and Humans," Tellus 38B:271-284 Gibbs, M.J. and D.E. Johnson (1993), "Livestock Emissions." In: International Methane Emissions, US Environmental Protection Agency, Climate Change Division, Washington, D.C., U.S.A Safley, L.M., M.E. Casada, J.W. Woodbury, and K.F. Roo…	Revised 1996 IPCC Guidelines for National Greenhouse Gas Inventories (Table 4-6 on Page 4.13 of the Reference Manual)	IPCC	7	0.799087	Component	AFOLU
43195	4B8 - Swine	3.A.2.h - Swine	METHANE	1996 IPCC default	Manure Management Emission Factor	Virtually all livestock manure is managed as a solid on pastures and ranges. About half of the swine manure is managed in anaerobic lagoons.	Annual Average temperature is less than 15 C	Climate: Cool; Region: Oceania			20	kg/head/yr	Equation 4.15 on Page 4.30 of the IPCC Good Practice Guidance and Uncertainty Management in National Greenhouse Gas Inventories	Worksheet 4-1, Sheet 1 of 2	Crutzen, P.J., I. Aselmann and W. Seiler (1986), "Methane Production by Domestic Animals, Wild Ruminants, Other Herbivorous Fauna, and Humans," Tellus 38B:271-284 Safley, L.M., M.E. Casada, J.W. Woodbury, and K.F. Roos (1992), Global Methane Emissions from Livestock and Poultry Manure. US Environmental Protection Agency, Global Change Division, Washington, D.C., February 1992, EPA/400/1091/048. W…	Revised 1996 IPCC Guidelines for National Greenhouse Gas Inventories (Table 4-6 on Page 4.13 of the Reference Manual)	IPCC	20	2.28311	Component	AFOLU
43196	4B8 - Swine	3.A.2.h - Swine	METHANE	1996 IPCC default	Manure Management Emission Factor	Virtually all livestock manure is managed as a solid on pastures and ranges. About half of the swine manure is managed in anaerobic lagoons.	Annual Average temperature is between 15 C and 25 C	Climate: Temp; Region: Oceania			20	kg/head/yr	Equation 4.15 on Page 4.30 of the IPCC Good Practice Guidance and Uncertainty Management in National Greenhouse Gas Inventories	Worksheet 4-1, Sheet 1 of 2	Crutzen, P.J., I. Aselmann and W. Seiler (1986), "Methane Production by Domestic Animals, Wild Ruminants, Other Herbivorous Fauna, and Humans," Tellus 38B:271-284 Safley, L.M., M.E. Casada, J.W. Woodbury, and K.F. Roos (1992), Global Methane Emissions from Livestock and Poultry Manure. US Environmental Protection Agency, Global Change Division, Washington, D.C., February 1992, EPA/400/1091/048. W…	Revised 1996 IPCC Guidelines for National Greenhouse Gas Inventories (Table 4-6 on Page 4.13 of the Reference Manual)	IPCC	20	2.28311	Component	AFOLU
43197	4B8 - Swine	3.A.2.h - Swine	METHANE	1996 IPCC default	Manure Management Emission Factor	Virtually all livestock manure is managed as a solid on pastures and ranges. About half of the swine manure is managed in anaerobic lagoons.	Annual Average temperature is greater than 25 C	Climate: Warm; Region: Oceania			20	kg/head/yr	Equation 4.15 on Page 4.30 of the IPCC Good Practice Guidance and Uncertainty Management in National Greenhouse Gas Inventories	Worksheet 4-1, Sheet 1 of 2	Crutzen, P.J., I. Aselmann and W. Seiler (1986), "Methane Production by Domestic Animals, Wild Ruminants, Other Herbivorous Fauna, and Humans," Tellus 38B:271-284 Safley, L.M., M.E. Casada, J.W. Woodbury, and K.F. Roos (1992), Global Methane Emissions from Livestock and Poultry Manure. US Environmental Protection Agency, Global Change Division, Washington, D.C., February 1992, EPA/400/1091/048. W…	Revised 1996 IPCC Guidelines for National Greenhouse Gas Inventories (Table 4-6 on Page 4.13 of the Reference Manual)	IPCC	20	2.28311	Component	AFOLU
43198	4B1a - Dairy	3.A.2.a.i - Dairy cows	METHANE	1996 IPCC default	Manure Management Emission Factor	Almost all livestock manure is managed as a solid on pastures and ranges.	Annual Average temperature is less than 15 C	Climate: Cool; Region: Latin America			0	kg/head/yr	Equation 4.15 on Page 4.30 of the IPCC Good Practice Guidance and Uncertainty Management in National Greenhouse Gas Inventories	Worksheet 4-1, Sheet 1 of 2	Crutzen, P.J., I. Aselmann and W. Seiler (1986), "Methane Production by Domestic Animals, Wild Ruminants, Other Herbivorous Fauna, and Humans," Tellus 38B:271-284 Gibbs, M.J. and D.E. Johnson (1993), "Livestock Emissions." In: International Methane Emissions, US Environmental Protection Agency, Climate Change Division, Washington, D.C., U.S.A Safley, L.M., M.E. Casada, J.W. Woodbury, and K.F. Roo…	Revised 1996 IPCC Guidelines for National Greenhouse Gas Inventories (Table 4-6 on Page 4.13 of the Reference Manual)	IPCC	0	0	Component	AFOLU
43199	4B1a - Dairy	3.A.2.a.i - Dairy cows	METHANE	1996 IPCC default	Manure Management Emission Factor	Almost all livestock manure is managed as a solid on pastures and ranges.	Annual Average temperature is between 15 C and 25 C	Climate: Temp; Region: Latin America			1	kg/head/yr	Equation 4.15 on Page 4.30 of the IPCC Good Practice Guidance and Uncertainty Management in National Greenhouse Gas Inventories	Worksheet 4-1, Sheet 1 of 2	Crutzen, P.J., I. Aselmann and W. Seiler (1986), "Methane Production by Domestic Animals, Wild Ruminants, Other Herbivorous Fauna, and Humans," Tellus 38B:271-284 Gibbs, M.J. and D.E. Johnson (1993), "Livestock Emissions." In: International Methane Emissions, US Environmental Protection Agency, Climate Change Division, Washington, D.C., U.S.A Safley, L.M., M.E. Casada, J.W. Woodbury, and K.F. Roo…	Revised 1996 IPCC Guidelines for National Greenhouse Gas Inventories (Table 4-6 on Page 4.13 of the Reference Manual)	IPCC	1	0.114155	Component	AFOLU
43200	4B1a - Dairy	3.A.2.a.i - Dairy cows	METHANE	1996 IPCC default	Manure Management Emission Factor	Almost all livestock manure is managed as a solid on pastures and ranges.	Annual Average temperature is greater than 25 C	Climate: Warm; Region: Latin America			2	kg/head/yr	Equation 4.15 on Page 4.30 of the IPCC Good Practice Guidance and Uncertainty Management in National Greenhouse Gas Inventories	Worksheet 4-1, Sheet 1 of 2	Crutzen, P.J., I. Aselmann and W. Seiler (1986), "Methane Production by Domestic Animals, Wild Ruminants, Other Herbivorous Fauna, and Humans," Tellus 38B:271-284 Gibbs, M.J. and D.E. Johnson (1993), "Livestock Emissions." In: International Methane Emissions, US Environmental Protection Agency, Climate Change Division, Washington, D.C., U.S.A Safley, L.M., M.E. Casada, J.W. Woodbury, and K.F. Roo…	Revised 1996 IPCC Guidelines for National Greenhouse Gas Inventories (Table 4-6 on Page 4.13 of the Reference Manual)	IPCC	2	0.228311	Component	AFOLU
43201	4B1b - Non-Dairy	3.A.2.a.ii - Other cattle	METHANE	1996 IPCC default	Manure Management Emission Factor	Almost all livestock manure is managed as a solid on pastures and ranges.	Annual Average temperature is less than 15 C	Climate: Cool; Region: Latin America			1	kg/head/yr	Equation 4.15 on Page 4.30 of the IPCC Good Practice Guidance and Uncertainty Management in National Greenhouse Gas Inventories	Worksheet 4-1, Sheet 1 of 2	Crutzen, P.J., I. Aselmann and W. Seiler (1986), "Methane Production by Domestic Animals, Wild Ruminants, Other Herbivorous Fauna, and Humans," Tellus 38B:271-284 Gibbs, M.J. and D.E. Johnson (1993), "Livestock Emissions." In: International Methane Emissions, US Environmental Protection Agency, Climate Change Division, Washington, D.C., U.S.A Safley, L.M., M.E. Casada, J.W. Woodbury, and K.F. Roo…	Revised 1996 IPCC Guidelines for National Greenhouse Gas Inventories (Table 4-6 on Page 4.13 of the Reference Manual)	IPCC	1	0.114155	Component	AFOLU
43203	4B1b - Non-Dairy	3.A.2.a.ii - Other cattle	METHANE	1996 IPCC default	Manure Management Emission Factor	Almost all livestock manure is managed as a solid on pastures and ranges.	Annual Average temperature is greater than 25 C	Climate: Warm; Region: Latin America			1	kg/head/yr	Equation 4.15 on Page 4.30 of the IPCC Good Practice Guidance and Uncertainty Management in National Greenhouse Gas Inventories	Worksheet 4-1, Sheet 1 of 2	Crutzen, P.J., I. Aselmann and W. Seiler (1986), "Methane Production by Domestic Animals, Wild Ruminants, Other Herbivorous Fauna, and Humans," Tellus 38B:271-284 Gibbs, M.J. and D.E. Johnson (1993), "Livestock Emissions." In: International Methane Emissions, US Environmental Protection Agency, Climate Change Division, Washington, D.C., U.S.A Safley, L.M., M.E. Casada, J.W. Woodbury, and K.F. Roo…	Revised 1996 IPCC Guidelines for National Greenhouse Gas Inventories (Table 4-6 on Page 4.13 of the Reference Manual)	IPCC	1	0.114155	Component	AFOLU
43204	4B8 - Swine	3.A.2.h - Swine	METHANE	1996 IPCC default	Manure Management Emission Factor	Almost all livestock manure is managed as a solid on pastures and ranges.	Annual Average temperature is less than 15 C	Climate: Cool; Region: Latin America			0	kg/head/yr	Equation 4.15 on Page 4.30 of the IPCC Good Practice Guidance and Uncertainty Management in National Greenhouse Gas Inventories	Worksheet 4-1, Sheet 1 of 2	Crutzen, P.J., I. Aselmann and W. Seiler (1986), "Methane Production by Domestic Animals, Wild Ruminants, Other Herbivorous Fauna, and Humans," Tellus 38B:271-284 Safley, L.M., M.E. Casada, J.W. Woodbury, and K.F. Roos (1992), Global Methane Emissions from Livestock and Poultry Manure. US Environmental Protection Agency, Global Change Division, Washington, D.C., February 1992, EPA/400/1091/048. W…	Revised 1996 IPCC Guidelines for National Greenhouse Gas Inventories (Table 4-6 on Page 4.13 of the Reference Manual)	IPCC	0	0	Component	AFOLU
43205	4B8 - Swine	3.A.2.h - Swine	METHANE	1996 IPCC default	Manure Management Emission Factor	Almost all livestock manure is managed as a solid on pastures and ranges.	Annual Average temperature is between 15 C and 25 C	Climate: Temp; Region: Latin America			1	kg/head/yr	Equation 4.15 on Page 4.30 of the IPCC Good Practice Guidance and Uncertainty Management in National Greenhouse Gas Inventories	Worksheet 4-1, Sheet 1 of 2	Crutzen, P.J., I. Aselmann and W. Seiler (1986), "Methane Production by Domestic Animals, Wild Ruminants, Other Herbivorous Fauna, and Humans," Tellus 38B:271-284 Safley, L.M., M.E. Casada, J.W. Woodbury, and K.F. Roos (1992), Global Methane Emissions from Livestock and Poultry Manure. US Environmental Protection Agency, Global Change Division, Washington, D.C., February 1992, EPA/400/1091/048. W…	Revised 1996 IPCC Guidelines for National Greenhouse Gas Inventories (Table 4-6 on Page 4.13 of the Reference Manual)	IPCC	1	0.114155	Component	AFOLU
43206	4B8 - Swine	3.A.2.h - Swine	METHANE	1996 IPCC default	Manure Management Emission Factor	Almost all livestock manure is managed as a solid on pastures and ranges.	Annual Average temperature is greater than 25 C	Climate: Warm; Region: Latin America			2	kg/head/yr	Equation 4.15 on Page 4.30 of the IPCC Good Practice Guidance and Uncertainty Management in National Greenhouse Gas Inventories	Worksheet 4-1, Sheet 1 of 2	Crutzen, P.J., I. Aselmann and W. Seiler (1986), "Methane Production by Domestic Animals, Wild Ruminants, Other Herbivorous Fauna, and Humans," Tellus 38B:271-284 Safley, L.M., M.E. Casada, J.W. Woodbury, and K.F. Roos (1992), Global Methane Emissions from Livestock and Poultry Manure. US Environmental Protection Agency, Global Change Division, Washington, D.C., February 1992, EPA/400/1091/048. W…	Revised 1996 IPCC Guidelines for National Greenhouse Gas Inventories (Table 4-6 on Page 4.13 of the Reference Manual)	IPCC	2	0.228311	Component	AFOLU
43207	4B2 - Buffalo	3.A.2.b - Buffalo	METHANE	1996 IPCC default	Manure Management Emission Factor	Buffalo manure is deposited on pastures and ranges.	Annual Average temperature is less than 15 C	Climate: Cool; Region: Latin America			1	kg/head/yr	Equation 4.15 on Page 4.30 of the IPCC Good Practice Guidance and Uncertainty Management in National Greenhouse Gas Inventories	Worksheet 4-1, Sheet 1 of 2	Crutzen, P.J., I. Aselmann and W. Seiler (1986), "Methane Production by Domestic Animals, Wild Ruminants, Other Herbivorous Fauna, and Humans," Tellus 38B:271-284 Gibbs, M.J. and D.E. Johnson (1993), "Livestock Emissions." In: International Methane Emissions, US Environmental Protection Agency, Climate Change Division, Washington, D.C., U.S.A Safley, L.M., M.E. Casada, J.W. Woodbury, and K.F. Roo…	Revised 1996 IPCC Guidelines for National Greenhouse Gas Inventories (Table 4-6 on Page 4.13 of the Reference Manual)	IPCC	1	0.114155	Component	AFOLU
43208	4B2 - Buffalo	3.A.2.b - Buffalo	METHANE	1996 IPCC default	Manure Management Emission Factor	Buffalo manure is deposited on pastures and ranges.	Annual Average temperature is between 15 C and 25 C	Climate: Temp; Region: Latin America			1	kg/head/yr	Equation 4.15 on Page 4.30 of the IPCC Good Practice Guidance and Uncertainty Management in National Greenhouse Gas Inventories	Worksheet 4-1, Sheet 1 of 2	Crutzen, P.J., I. Aselmann and W. Seiler (1986), "Methane Production by Domestic Animals, Wild Ruminants, Other Herbivorous Fauna, and Humans," Tellus 38B:271-284 Gibbs, M.J. and D.E. Johnson (1993), "Livestock Emissions." In: International Methane Emissions, US Environmental Protection Agency, Climate Change Division, Washington, D.C., U.S.A Safley, L.M., M.E. Casada, J.W. Woodbury, and K.F. Roo…	Revised 1996 IPCC Guidelines for National Greenhouse Gas Inventories (Table 4-6 on Page 4.13 of the Reference Manual)	IPCC	1	0.114155	Component	AFOLU
43209	4B2 - Buffalo	3.A.2.b - Buffalo	METHANE	1996 IPCC default	Manure Management Emission Factor	Buffalo manure is deposited on pastures and ranges.	Annual Average temperature is greater than 25 C	Climate: Warm; Region: Latin America			2	kg/head/yr	Equation 4.15 on Page 4.30 of the IPCC Good Practice Guidance and Uncertainty Management in National Greenhouse Gas Inventories	Worksheet 4-1, Sheet 1 of 2	Crutzen, P.J., I. Aselmann and W. Seiler (1986), "Methane Production by Domestic Animals, Wild Ruminants, Other Herbivorous Fauna, and Humans," Tellus 38B:271-284 Gibbs, M.J. and D.E. Johnson (1993), "Livestock Emissions." In: International Methane Emissions, US Environmental Protection Agency, Climate Change Division, Washington, D.C., U.S.A Safley, L.M., M.E. Casada, J.W. Woodbury, and K.F. Roo…	Revised 1996 IPCC Guidelines for National Greenhouse Gas Inventories (Table 4-6 on Page 4.13 of the Reference Manual)	IPCC	2	0.228311	Component	AFOLU
43210	4B1a - Dairy	3.A.2.a.i - Dairy cows	METHANE	1996 IPCC default	Manure Management Emission Factor	Almost all livestock manure is managed as a solid on pastures and ranges.	Annual Average temperature is less than 15 C	Climate: Cool; Region: Africa			1	kg/head/yr	Equation 4.15 on Page 4.30 of the IPCC Good Practice Guidance and Uncertainty Management in National Greenhouse Gas Inventories	Worksheet 4-1, Sheet 1 of 2	Crutzen, P.J., I. Aselmann and W. Seiler (1986), "Methane Production by Domestic Animals, Wild Ruminants, Other Herbivorous Fauna, and Humans," Tellus 38B:271-284 Gibbs, M.J. and D.E. Johnson (1993), "Livestock Emissions." In: International Methane Emissions, US Environmental Protection Agency, Climate Change Division, Washington, D.C., U.S.A Safley, L.M., M.E. Casada, J.W. Woodbury, and K.F. Roo…	Revised 1996 IPCC Guidelines for National Greenhouse Gas Inventories (Table 4-6 on Page 4.13 of the Reference Manual)	IPCC	1	0.114155	Component	AFOLU
43211	4B1a - Dairy	3.A.2.a.i - Dairy cows	METHANE	1996 IPCC default	Manure Management Emission Factor	Almost all livestock manure is managed as a solid on pastures and ranges.	Annual Average temperature is between 15 C and 25 C	Climate: Temp; Region: Africa			1	kg/head/yr	Equation 4.15 on Page 4.30 of the IPCC Good Practice Guidance and Uncertainty Management in National Greenhouse Gas Inventories	Worksheet 4-1, Sheet 1 of 2	Crutzen, P.J., I. Aselmann and W. Seiler (1986), "Methane Production by Domestic Animals, Wild Ruminants, Other Herbivorous Fauna, and Humans," Tellus 38B:271-284 Gibbs, M.J. and D.E. Johnson (1993), "Livestock Emissions." In: International Methane Emissions, US Environmental Protection Agency, Climate Change Division, Washington, D.C., U.S.A Safley, L.M., M.E. Casada, J.W. Woodbury, and K.F. Roo…	Revised 1996 IPCC Guidelines for National Greenhouse Gas Inventories (Table 4-6 on Page 4.13 of the Reference Manual)	IPCC	1	0.114155	Component	AFOLU
43212	4B1a - Dairy	3.A.2.a.i - Dairy cows	METHANE	1996 IPCC default	Manure Management Emission Factor	Almost all livestock manure is managed as a solid on pastures and ranges.	Annual Average temperature is greater than 25 C	Climate: Warm; Region: Africa			1	kg/head/yr	Equation 4.15 on Page 4.30 of the IPCC Good Practice Guidance and Uncertainty Management in National Greenhouse Gas Inventories	Worksheet 4-1, Sheet 1 of 2	Crutzen, P.J., I. Aselmann and W. Seiler (1986), "Methane Production by Domestic Animals, Wild Ruminants, Other Herbivorous Fauna, and Humans," Tellus 38B:271-284 Gibbs, M.J. and D.E. Johnson (1993), "Livestock Emissions." In: International Methane Emissions, US Environmental Protection Agency, Climate Change Division, Washington, D.C., U.S.A Safley, L.M., M.E. Casada, J.W. Woodbury, and K.F. Roo…	Revised 1996 IPCC Guidelines for National Greenhouse Gas Inventories (Table 4-6 on Page 4.13 of the Reference Manual)	IPCC	1	0.114155	Component	AFOLU
43213	4B1b - Non-Dairy	3.A.2.a.ii - Other cattle	METHANE	1996 IPCC default	Manure Management Emission Factor	Almost all livestock manure is managed as a solid on pastures and ranges.	Annual Average temperature is less than 15 C	Climate: Cool; Region: Africa			0	kg/head/yr	Equation 4.15 on Page 4.30 of the IPCC Good Practice Guidance and Uncertainty Management in National Greenhouse Gas Inventories	Worksheet 4-1, Sheet 1 of 2	Crutzen, P.J., I. Aselmann and W. Seiler (1986), "Methane Production by Domestic Animals, Wild Ruminants, Other Herbivorous Fauna, and Humans," Tellus 38B:271-284 Gibbs, M.J. and D.E. Johnson (1993), "Livestock Emissions." In: International Methane Emissions, US Environmental Protection Agency, Climate Change Division, Washington, D.C., U.S.A Safley, L.M., M.E. Casada, J.W. Woodbury, and K.F. Roo…	Revised 1996 IPCC Guidelines for National Greenhouse Gas Inventories (Table 4-6 on Page 4.13 of the Reference Manual)	IPCC	0	0	Component	AFOLU
43216	4B8 - Swine	3.A.2.h - Swine	METHANE	1996 IPCC default	Manure Management Emission Factor	Almost all livestock manure is managed as a solid on pastures and ranges.	Annual Average temperature is less than 15 C	Climate: Cool; Region: Africa			0	kg/head/yr	Equation 4.15 on Page 4.30 of the IPCC Good Practice Guidance and Uncertainty Management in National Greenhouse Gas Inventories	Worksheet 4-1, Sheet 1 of 2	Crutzen, P.J., I. Aselmann and W. Seiler (1986), "Methane Production by Domestic Animals, Wild Ruminants, Other Herbivorous Fauna, and Humans," Tellus 38B:271-284 Safley, L.M., M.E. Casada, J.W. Woodbury, and K.F. Roos (1992), Global Methane Emissions from Livestock and Poultry Manure. US Environmental Protection Agency, Global Change Division, Washington, D.C., February 1992, EPA/400/1091/048. W…	Revised 1996 IPCC Guidelines for National Greenhouse Gas Inventories (Table 4-6 on Page 4.13 of the Reference Manual)	IPCC	0	0	Component	AFOLU
43217	4B8 - Swine	3.A.2.h - Swine	METHANE	1996 IPCC default	Manure Management Emission Factor	Almost all livestock manure is managed as a solid on pastures and ranges.	Annual Average temperature is between 15 C and 25 C	Climate: Temp; Region: Africa			1	kg/head/yr	Equation 4.15 on Page 4.30 of the IPCC Good Practice Guidance and Uncertainty Management in National Greenhouse Gas Inventories	Worksheet 4-1, Sheet 1 of 2	Crutzen, P.J., I. Aselmann and W. Seiler (1986), "Methane Production by Domestic Animals, Wild Ruminants, Other Herbivorous Fauna, and Humans," Tellus 38B:271-284 Safley, L.M., M.E. Casada, J.W. Woodbury, and K.F. Roos (1992), Global Methane Emissions from Livestock and Poultry Manure. US Environmental Protection Agency, Global Change Division, Washington, D.C., February 1992, EPA/400/1091/048. W…	Revised 1996 IPCC Guidelines for National Greenhouse Gas Inventories (Table 4-6 on Page 4.13 of the Reference Manual)	IPCC	1	0.114155	Component	AFOLU
43218	4B8 - Swine	3.A.2.h - Swine	METHANE	1996 IPCC default	Manure Management Emission Factor	Almost all livestock manure is managed as a solid on pastures and ranges.	Annual Average temperature is greater than 25 C	Climate: Warm; Region: Africa			2	kg/head/yr	Equation 4.15 on Page 4.30 of the IPCC Good Practice Guidance and Uncertainty Management in National Greenhouse Gas Inventories	Worksheet 4-1, Sheet 1 of 2	Crutzen, P.J., I. Aselmann and W. Seiler (1986), "Methane Production by Domestic Animals, Wild Ruminants, Other Herbivorous Fauna, and Humans," Tellus 38B:271-284 Safley, L.M., M.E. Casada, J.W. Woodbury, and K.F. Roos (1992), Global Methane Emissions from Livestock and Poultry Manure. US Environmental Protection Agency, Global Change Division, Washington, D.C., February 1992, EPA/400/1091/048. W…	Revised 1996 IPCC Guidelines for National Greenhouse Gas Inventories (Table 4-6 on Page 4.13 of the Reference Manual)	IPCC	2	0.228311	Component	AFOLU
43219	4B1a - Dairy	3.A.2.a.i - Dairy cows	METHANE	1996 IPCC default	Manure Management Emission Factor	Over two-thirds of cattle manure is deposited on pastures and ranges.	Annual Average temperature is less than 15 C	Climate: Cool; Region: Middle East			1	kg/head/yr	Equation 4.15 on Page 4.30 of the IPCC Good Practice Guidance and Uncertainty Management in National Greenhouse Gas Inventories	Worksheet 4-1, Sheet 1 of 2	Crutzen, P.J., I. Aselmann and W. Seiler (1986), "Methane Production by Domestic Animals, Wild Ruminants, Other Herbivorous Fauna, and Humans," Tellus 38B:271-284 Gibbs, M.J. and D.E. Johnson (1993), "Livestock Emissions." In: International Methane Emissions, US Environmental Protection Agency, Climate Change Division, Washington, D.C., U.S.A Safley, L.M., M.E. Casada, J.W. Woodbury, and K.F. Roo…	Revised 1996 IPCC Guidelines for National Greenhouse Gas Inventories (Table 4-6 on Page 4.13 of the Reference Manual)	IPCC	1	0.114155	Component	AFOLU
43220	4B1a - Dairy	3.A.2.a.i - Dairy cows	METHANE	1996 IPCC default	Manure Management Emission Factor	Over two-thirds of cattle manure is deposited on pastures and ranges.	Annual Average temperature is between 15 C and 25 C	Climate: Temp; Region: Middle East			2	kg/head/yr	Equation 4.15 on Page 4.30 of the IPCC Good Practice Guidance and Uncertainty Management in National Greenhouse Gas Inventories	Worksheet 4-1, Sheet 1 of 2	Crutzen, P.J., I. Aselmann and W. Seiler (1986), "Methane Production by Domestic Animals, Wild Ruminants, Other Herbivorous Fauna, and Humans," Tellus 38B:271-284 Gibbs, M.J. and D.E. Johnson (1993), "Livestock Emissions." In: International Methane Emissions, US Environmental Protection Agency, Climate Change Division, Washington, D.C., U.S.A Safley, L.M., M.E. Casada, J.W. Woodbury, and K.F. Roo…	Revised 1996 IPCC Guidelines for National Greenhouse Gas Inventories (Table 4-6 on Page 4.13 of the Reference Manual)	IPCC	2	0.228311	Component	AFOLU
43221	4B1a - Dairy	3.A.2.a.i - Dairy cows	METHANE	1996 IPCC default	Manure Management Emission Factor	Over two-thirds of cattle manure is deposited on pastures and ranges.	Annual Average temperature is greater than 25 C	Climate: Warm; Region: Middle East			2	kg/head/yr	Equation 4.15 on Page 4.30 of the IPCC Good Practice Guidance and Uncertainty Management in National Greenhouse Gas Inventories	Worksheet 4-1, Sheet 1 of 2	Crutzen, P.J., I. Aselmann and W. Seiler (1986), "Methane Production by Domestic Animals, Wild Ruminants, Other Herbivorous Fauna, and Humans," Tellus 38B:271-284 Gibbs, M.J. and D.E. Johnson (1993), "Livestock Emissions." In: International Methane Emissions, US Environmental Protection Agency, Climate Change Division, Washington, D.C., U.S.A Safley, L.M., M.E. Casada, J.W. Woodbury, and K.F. Roo…	Revised 1996 IPCC Guidelines for National Greenhouse Gas Inventories (Table 4-6 on Page 4.13 of the Reference Manual)	IPCC	2	0.228311	Component	AFOLU
43223	4B1b - Non-Dairy	3.A.2.a.ii - Other cattle	METHANE	1996 IPCC default	Manure Management Emission Factor	Over two-thirds of cattle manure is deposited on pastures and ranges.	Annual Average temperature is between 15 C and 25 C	Climate: Temp; Region: Middle East			1	kg/head/yr	Equation 4.15 on Page 4.30 of the IPCC Good Practice Guidance and Uncertainty Management in National Greenhouse Gas Inventories	Worksheet 4-1, Sheet 1 of 2	Crutzen, P.J., I. Aselmann and W. Seiler (1986), "Methane Production by Domestic Animals, Wild Ruminants, Other Herbivorous Fauna, and Humans," Tellus 38B:271-284 Gibbs, M.J. and D.E. Johnson (1993), "Livestock Emissions." In: International Methane Emissions, US Environmental Protection Agency, Climate Change Division, Washington, D.C., U.S.A Safley, L.M., M.E. Casada, J.W. Woodbury, and K.F. Roo…	Revised 1996 IPCC Guidelines for National Greenhouse Gas Inventories (Table 4-6 on Page 4.13 of the Reference Manual)	IPCC	1	0.114155	Component	AFOLU
43224	4B1b - Non-Dairy	3.A.2.a.ii - Other cattle	METHANE	1996 IPCC default	Manure Management Emission Factor	Over two-thirds of cattle manure is deposited on pastures and ranges.	Annual Average temperature is greater than 25 C	Climate: Warm; Region: Middle East			1	kg/head/yr	Equation 4.15 on Page 4.30 of the IPCC Good Practice Guidance and Uncertainty Management in National Greenhouse Gas Inventories	Worksheet 4-1, Sheet 1 of 2	Crutzen, P.J., I. Aselmann and W. Seiler (1986), "Methane Production by Domestic Animals, Wild Ruminants, Other Herbivorous Fauna, and Humans," Tellus 38B:271-284 Gibbs, M.J. and D.E. Johnson (1993), "Livestock Emissions." In: International Methane Emissions, US Environmental Protection Agency, Climate Change Division, Washington, D.C., U.S.A Safley, L.M., M.E. Casada, J.W. Woodbury, and K.F. Roo…	Revised 1996 IPCC Guidelines for National Greenhouse Gas Inventories (Table 4-6 on Page 4.13 of the Reference Manual)	IPCC	1	0.114155	Component	AFOLU
43225	4B8 - Swine	3.A.2.h - Swine	METHANE	1996 IPCC default	Manure Management Emission Factor	About one-third of swine manure is managed in liquid-based systems.	Annual Average temperature is less than 15 C	Climate: Cool; Region: Middle East			1	kg/head/yr	Equation 4.15 on Page 4.30 of the IPCC Good Practice Guidance and Uncertainty Management in National Greenhouse Gas Inventories	Worksheet 4-1, Sheet 1 of 2	Crutzen, P.J., I. Aselmann and W. Seiler (1986), "Methane Production by Domestic Animals, Wild Ruminants, Other Herbivorous Fauna, and Humans," Tellus 38B:271-284 Safley, L.M., M.E. Casada, J.W. Woodbury, and K.F. Roos (1992), Global Methane Emissions from Livestock and Poultry Manure. US Environmental Protection Agency, Global Change Division, Washington, D.C., February 1992, EPA/400/1091/048. W…	Revised 1996 IPCC Guidelines for National Greenhouse Gas Inventories (Table 4-6 on Page 4.13 of the Reference Manual)	IPCC	1	0.114155	Component	AFOLU
43226	4B8 - Swine	3.A.2.h - Swine	METHANE	1996 IPCC default	Manure Management Emission Factor	About one-third of swine manure is managed in liquid-based systems.	Annual Average temperature is between 15 C and 25 C	Climate: Temp; Region: Middle East			3	kg/head/yr	Equation 4.15 on Page 4.30 of the IPCC Good Practice Guidance and Uncertainty Management in National Greenhouse Gas Inventories	Worksheet 4-1, Sheet 1 of 2	Crutzen, P.J., I. Aselmann and W. Seiler (1986), "Methane Production by Domestic Animals, Wild Ruminants, Other Herbivorous Fauna, and Humans," Tellus 38B:271-284 Safley, L.M., M.E. Casada, J.W. Woodbury, and K.F. Roos (1992), Global Methane Emissions from Livestock and Poultry Manure. US Environmental Protection Agency, Global Change Division, Washington, D.C., February 1992, EPA/400/1091/048. W…	Revised 1996 IPCC Guidelines for National Greenhouse Gas Inventories (Table 4-6 on Page 4.13 of the Reference Manual)	IPCC	3	0.342466	Component	AFOLU
43227	4B8 - Swine	3.A.2.h - Swine	METHANE	1996 IPCC default	Manure Management Emission Factor	About one-third of swine manure is managed in liquid-based systems.	Annual Average temperature is greater than 25 C	Climate: Warm; Region: Middle East			6	kg/head/yr	Equation 4.15 on Page 4.30 of the IPCC Good Practice Guidance and Uncertainty Management in National Greenhouse Gas Inventories	Worksheet 4-1, Sheet 1 of 2	Crutzen, P.J., I. Aselmann and W. Seiler (1986), "Methane Production by Domestic Animals, Wild Ruminants, Other Herbivorous Fauna, and Humans," Tellus 38B:271-284 Safley, L.M., M.E. Casada, J.W. Woodbury, and K.F. Roos (1992), Global Methane Emissions from Livestock and Poultry Manure. US Environmental Protection Agency, Global Change Division, Washington, D.C., February 1992, EPA/400/1091/048. W…	Revised 1996 IPCC Guidelines for National Greenhouse Gas Inventories (Table 4-6 on Page 4.13 of the Reference Manual)	IPCC	6	0.684932	Component	AFOLU
43228	4B2 - Buffalo	3.A.2.b - Buffalo	METHANE	1996 IPCC default	Manure Management Emission Factor	Buffalo manure is burned for fuel or managed as solid.	Annual Average temperature is less than 15 C	Climate: Cool; Region: Middle East			4	kg/head/yr	Equation 4.15 on Page 4.30 of the IPCC Good Practice Guidance and Uncertainty Management in National Greenhouse Gas Inventories	Worksheet 4-1, Sheet 1 of 2	Crutzen, P.J., I. Aselmann and W. Seiler (1986), "Methane Production by Domestic Animals, Wild Ruminants, Other Herbivorous Fauna, and Humans," Tellus 38B:271-284 Gibbs, M.J. and D.E. Johnson (1993), "Livestock Emissions." In: International Methane Emissions, US Environmental Protection Agency, Climate Change Division, Washington, D.C., U.S.A Safley, L.M., M.E. Casada, J.W. Woodbury, and K.F. Roo…	Revised 1996 IPCC Guidelines for National Greenhouse Gas Inventories (Table 4-6 on Page 4.13 of the Reference Manual)	IPCC	4	0.456621	Component	AFOLU
43229	4B2 - Buffalo	3.A.2.b - Buffalo	METHANE	1996 IPCC default	Manure Management Emission Factor	Buffalo manure is burned for fuel or managed as solid.	Annual Average temperature is between 15 C and 25 C	Climate: Temp; Region: Middle East			5	kg/head/yr	Equation 4.15 on Page 4.30 of the IPCC Good Practice Guidance and Uncertainty Management in National Greenhouse Gas Inventories	Worksheet 4-1, Sheet 1 of 2	Crutzen, P.J., I. Aselmann and W. Seiler (1986), "Methane Production by Domestic Animals, Wild Ruminants, Other Herbivorous Fauna, and Humans," Tellus 38B:271-284 Gibbs, M.J. and D.E. Johnson (1993), "Livestock Emissions." In: International Methane Emissions, US Environmental Protection Agency, Climate Change Division, Washington, D.C., U.S.A Safley, L.M., M.E. Casada, J.W. Woodbury, and K.F. Roo…	Revised 1996 IPCC Guidelines for National Greenhouse Gas Inventories (Table 4-6 on Page 4.13 of the Reference Manual)	IPCC	5	0.570776	Component	AFOLU
43230	4B2 - Buffalo	3.A.2.b - Buffalo	METHANE	1996 IPCC default	Manure Management Emission Factor	Buffalo manure is burned for fuel or managed as solid.	Annual Average temperature is greater than 25 C	Climate: Warm; Region: Middle East			5	kg/head/yr	Equation 4.15 on Page 4.30 of the IPCC Good Practice Guidance and Uncertainty Management in National Greenhouse Gas Inventories	Worksheet 4-1, Sheet 1 of 2	Crutzen, P.J., I. Aselmann and W. Seiler (1986), "Methane Production by Domestic Animals, Wild Ruminants, Other Herbivorous Fauna, and Humans," Tellus 38B:271-284 Gibbs, M.J. and D.E. Johnson (1993), "Livestock Emissions." In: International Methane Emissions, US Environmental Protection Agency, Climate Change Division, Washington, D.C., U.S.A Safley, L.M., M.E. Casada, J.W. Woodbury, and K.F. Roo…	Revised 1996 IPCC Guidelines for National Greenhouse Gas Inventories (Table 4-6 on Page 4.13 of the Reference Manual)	IPCC	5	0.570776	Component	AFOLU
43231	4B1a - Dairy	3.A.2.a.i - Dairy cows	METHANE	1996 IPCC default	Manure Management Emission Factor	About half of cattle manure is used for fuel with the remainder managed in dry systems.	Annual Average temperature is less than 15 C	Climate: Cool; Region: Asia			7	kg/head/yr	Equation 4.15 on Page 4.30 of the IPCC Good Practice Guidance and Uncertainty Management in National Greenhouse Gas Inventories	Worksheet 4-1, Sheet 1 of 2	Crutzen, P.J., I. Aselmann and W. Seiler (1986), "Methane Production by Domestic Animals, Wild Ruminants, Other Herbivorous Fauna, and Humans," Tellus 38B:271-284 Gibbs, M.J. and D.E. Johnson (1993), "Livestock Emissions." In: International Methane Emissions, US Environmental Protection Agency, Climate Change Division, Washington, D.C., U.S.A Safley, L.M., M.E. Casada, J.W. Woodbury, and K.F. Roo…	Revised 1996 IPCC Guidelines for National Greenhouse Gas Inventories (Table 4-6 on Page 4.13 of the Reference Manual)	IPCC	7	0.799087	Component	AFOLU
43232	4B1a - Dairy	3.A.2.a.i - Dairy cows	METHANE	1996 IPCC default	Manure Management Emission Factor	About half of cattle manure is used for fuel with the remainder managed in dry systems.	Annual Average temperature is between 15 C and 25 C	Climate: Temp; Region: Asia			16	kg/head/yr	Equation 4.15 on Page 4.30 of the IPCC Good Practice Guidance and Uncertainty Management in National Greenhouse Gas Inventories	Worksheet 4-1, Sheet 1 of 2	Crutzen, P.J., I. Aselmann and W. Seiler (1986), "Methane Production by Domestic Animals, Wild Ruminants, Other Herbivorous Fauna, and Humans," Tellus 38B:271-284 Gibbs, M.J. and D.E. Johnson (1993), "Livestock Emissions." In: International Methane Emissions, US Environmental Protection Agency, Climate Change Division, Washington, D.C., U.S.A Safley, L.M., M.E. Casada, J.W. Woodbury, and K.F. Roo…	Revised 1996 IPCC Guidelines for National Greenhouse Gas Inventories (Table 4-6 on Page 4.13 of the Reference Manual)	IPCC	16	1.82648	Component	AFOLU
43233	4B1a - Dairy	3.A.2.a.i - Dairy cows	METHANE	1996 IPCC default	Manure Management Emission Factor	About half of cattle manure is used for fuel with the remainder managed in dry systems.	Annual Average temperature is greater than 25 C	Climate: Warm; Region: Asia			27	kg/head/yr	Equation 4.15 on Page 4.30 of the IPCC Good Practice Guidance and Uncertainty Management in National Greenhouse Gas Inventories	Worksheet 4-1, Sheet 1 of 2	Crutzen, P.J., I. Aselmann and W. Seiler (1986), "Methane Production by Domestic Animals, Wild Ruminants, Other Herbivorous Fauna, and Humans," Tellus 38B:271-284 Gibbs, M.J. and D.E. Johnson (1993), "Livestock Emissions." In: International Methane Emissions, US Environmental Protection Agency, Climate Change Division, Washington, D.C., U.S.A Safley, L.M., M.E. Casada, J.W. Woodbury, and K.F. Roo…	Revised 1996 IPCC Guidelines for National Greenhouse Gas Inventories (Table 4-6 on Page 4.13 of the Reference Manual)	IPCC	27	3.08219	Component	AFOLU
43234	4B1b - Non-Dairy	3.A.2.a.ii - Other cattle	METHANE	1996 IPCC default	Manure Management Emission Factor	About half of cattle manure is used for fuel with the remainder managed in dry systems.	Annual Average temperature is less than 15 C	Climate: Cool; Region: Asia			1	kg/head/yr	Equation 4.15 on Page 4.30 of the IPCC Good Practice Guidance and Uncertainty Management in National Greenhouse Gas Inventories	Worksheet 4-1, Sheet 1 of 2	Crutzen, P.J., I. Aselmann and W. Seiler (1986), "Methane Production by Domestic Animals, Wild Ruminants, Other Herbivorous Fauna, and Humans," Tellus 38B:271-284 Gibbs, M.J. and D.E. Johnson (1993), "Livestock Emissions." In: International Methane Emissions, US Environmental Protection Agency, Climate Change Division, Washington, D.C., U.S.A Safley, L.M., M.E. Casada, J.W. Woodbury, and K.F. Roo…	Revised 1996 IPCC Guidelines for National Greenhouse Gas Inventories (Table 4-6 on Page 4.13 of the Reference Manual)	IPCC	1	0.114155	Component	AFOLU
43235	4B1b - Non-Dairy	3.A.2.a.ii - Other cattle	METHANE	1996 IPCC default	Manure Management Emission Factor	About half of cattle manure is used for fuel with the remainder managed in dry systems.	Annual Average temperature is between 15 C and 25 C	Climate: Temp; Region: Asia			1	kg/head/yr	Equation 4.15 on Page 4.30 of the IPCC Good Practice Guidance and Uncertainty Management in National Greenhouse Gas Inventories	Worksheet 4-1, Sheet 1 of 2	Crutzen, P.J., I. Aselmann and W. Seiler (1986), "Methane Production by Domestic Animals, Wild Ruminants, Other Herbivorous Fauna, and Humans," Tellus 38B:271-284 Gibbs, M.J. and D.E. Johnson (1993), "Livestock Emissions." In: International Methane Emissions, US Environmental Protection Agency, Climate Change Division, Washington, D.C., U.S.A Safley, L.M., M.E. Casada, J.W. Woodbury, and K.F. Roo…	Revised 1996 IPCC Guidelines for National Greenhouse Gas Inventories (Table 4-6 on Page 4.13 of the Reference Manual)	IPCC	1	0.114155	Component	AFOLU
43236	4B1b - Non-Dairy	3.A.2.a.ii - Other cattle	METHANE	1996 IPCC default	Manure Management Emission Factor	About half of cattle manure is used for fuel with the remainder managed in dry systems.	Annual Average temperature is greater than 25 C	Climate: Warm; Region: Asia			2	kg/head/yr	Equation 4.15 on Page 4.30 of the IPCC Good Practice Guidance and Uncertainty Management in National Greenhouse Gas Inventories	Worksheet 4-1, Sheet 1 of 2	Crutzen, P.J., I. Aselmann and W. Seiler (1986), "Methane Production by Domestic Animals, Wild Ruminants, Other Herbivorous Fauna, and Humans," Tellus 38B:271-284 Gibbs, M.J. and D.E. Johnson (1993), "Livestock Emissions." In: International Methane Emissions, US Environmental Protection Agency, Climate Change Division, Washington, D.C., U.S.A Safley, L.M., M.E. Casada, J.W. Woodbury, and K.F. Roo…	Revised 1996 IPCC Guidelines for National Greenhouse Gas Inventories (Table 4-6 on Page 4.13 of the Reference Manual)	IPCC	2	0.228311	Component	AFOLU
43237	4B8 - Swine	3.A.2.h - Swine	METHANE	1996 IPCC default	Manure Management Emission Factor	Almost 40% of swine manure is managed as a liquid.	Annual Average temperature is less than 15 C	Climate: Cool; Region: Asia			1	kg/head/yr	Equation 4.15 on Page 4.30 of the IPCC Good Practice Guidance and Uncertainty Management in National Greenhouse Gas Inventories	Worksheet 4-1, Sheet 1 of 2	Crutzen, P.J., I. Aselmann and W. Seiler (1986), "Methane Production by Domestic Animals, Wild Ruminants, Other Herbivorous Fauna, and Humans," Tellus 38B:271-284 Safley, L.M., M.E. Casada, J.W. Woodbury, and K.F. Roos (1992), Global Methane Emissions from Livestock and Poultry Manure. US Environmental Protection Agency, Global Change Division, Washington, D.C., February 1992, EPA/400/1091/048. W…	Revised 1996 IPCC Guidelines for National Greenhouse Gas Inventories (Table 4-6 on Page 4.13 of the Reference Manual)	IPCC	1	0.114155	Component	AFOLU
43238	4B8 - Swine	3.A.2.h - Swine	METHANE	1996 IPCC default	Manure Management Emission Factor	Almost 40% of swine manure is managed as a liquid.	Annual Average temperature is between 15 C and 25 C	Climate: Temp; Region: Asia			4	kg/head/yr	Equation 4.15 on Page 4.30 of the IPCC Good Practice Guidance and Uncertainty Management in National Greenhouse Gas Inventories	Worksheet 4-1, Sheet 1 of 2	Crutzen, P.J., I. Aselmann and W. Seiler (1986), "Methane Production by Domestic Animals, Wild Ruminants, Other Herbivorous Fauna, and Humans," Tellus 38B:271-284 Safley, L.M., M.E. Casada, J.W. Woodbury, and K.F. Roos (1992), Global Methane Emissions from Livestock and Poultry Manure. US Environmental Protection Agency, Global Change Division, Washington, D.C., February 1992, EPA/400/1091/048. W…	Revised 1996 IPCC Guidelines for National Greenhouse Gas Inventories (Table 4-6 on Page 4.13 of the Reference Manual)	IPCC	4	0.456621	Component	AFOLU
43239	4B8 - Swine	3.A.2.h - Swine	METHANE	1996 IPCC default	Manure Management Emission Factor	Almost 40% of swine manure is managed as a liquid.	Annual Average temperature is greater than 25 C	Climate: Warm; Region: Asia			7	kg/head/yr	Equation 4.15 on Page 4.30 of the IPCC Good Practice Guidance and Uncertainty Management in National Greenhouse Gas Inventories	Worksheet 4-1, Sheet 1 of 2	Crutzen, P.J., I. Aselmann and W. Seiler (1986), "Methane Production by Domestic Animals, Wild Ruminants, Other Herbivorous Fauna, and Humans," Tellus 38B:271-284 Safley, L.M., M.E. Casada, J.W. Woodbury, and K.F. Roos (1992), Global Methane Emissions from Livestock and Poultry Manure. US Environmental Protection Agency, Global Change Division, Washington, D.C., February 1992, EPA/400/1091/048. W…	Revised 1996 IPCC Guidelines for National Greenhouse Gas Inventories (Table 4-6 on Page 4.13 of the Reference Manual)	IPCC	7	0.799087	Component	AFOLU
43240	4B2 - Buffalo	3.A.2.b - Buffalo	METHANE	1996 IPCC default	Manure Management Emission Factor	Buffalo manure is managed in drylots and deposited in pastures and ranges.	Annual Average temperature is less than 15 C	Climate: Cool; Region: Asia	-	-	1	kg/head/yr	Equation 4.15 on Page 4.30 of the IPCC Good Practice Guidance and Uncertainty Management in National Greenhouse Gas Inventories	Worksheet 4-1, Sheet 1 of 2	Crutzen, P.J., I. Aselmann and W. Seiler (1986), "Methane Production by Domestic Animals, Wild Ruminants, Other Herbivorous Fauna, and Humans," Tellus 38B:271-284 Gibbs, M.J. and D.E. Johnson (1993), "Livestock Emissions." In: International Methane Emissions, US Environmental Protection Agency, Climate Change Division, Washington, D.C., U.S.A Safley, L.M., M.E. Casada, J.W. Woodbury, and K.F. Roo…	Revised 1996 IPCC Guidelines for National Greenhouse Gas Inventories (Table 4-6 on Page 4.13 of the Reference Manual)	IPCC	1	0.114155	Component	AFOLU
43241	4B2 - Buffalo	3.A.2.b - Buffalo	METHANE	1996 IPCC default	Manure Management Emission Factor	Buffalo manure is managed in drylots and deposited in pastures and ranges.	Annual Average temperature is between 15 C and 25 C	Climate: Temp; Region: Asia			2	kg/head/yr	Equation 4.15 on Page 4.30 of the IPCC Good Practice Guidance and Uncertainty Management in National Greenhouse Gas Inventories	Worksheet 4-1, Sheet 1 of 2	Crutzen, P.J., I. Aselmann and W. Seiler (1986), "Methane Production by Domestic Animals, Wild Ruminants, Other Herbivorous Fauna, and Humans," Tellus 38B:271-284 Gibbs, M.J. and D.E. Johnson (1993), "Livestock Emissions." In: International Methane Emissions, US Environmental Protection Agency, Climate Change Division, Washington, D.C., U.S.A Safley, L.M., M.E. Casada, J.W. Woodbury, and K.F. Roo…	Revised 1996 IPCC Guidelines for National Greenhouse Gas Inventories (Table 4-6 on Page 4.13 of the Reference Manual)	IPCC	2	0.228311	Component	AFOLU
43242	4B2 - Buffalo	3.A.2.b - Buffalo	METHANE	1996 IPCC default	Manure Management Emission Factor	Buffalo manure is managed in drylots and deposited in pastures and ranges.	Annual Average temperature is greater than 25 C	Climate: Warm; Region: Asia			3	kg/head/yr	Equation 4.15 on Page 4.30 of the IPCC Good Practice Guidance and Uncertainty Management in National Greenhouse Gas Inventories	Worksheet 4-1, Sheet 1 of 2	Crutzen, P.J., I. Aselmann and W. Seiler (1986), "Methane Production by Domestic Animals, Wild Ruminants, Other Herbivorous Fauna, and Humans," Tellus 38B:271-284 Gibbs, M.J. and D.E. Johnson (1993), "Livestock Emissions." In: International Methane Emissions, US Environmental Protection Agency, Climate Change Division, Washington, D.C., U.S.A Safley, L.M., M.E. Casada, J.W. Woodbury, and K.F. Roo…	Revised 1996 IPCC Guidelines for National Greenhouse Gas Inventories (Table 4-6 on Page 4.13 of the Reference Manual)	IPCC	3	0.342466	Component	AFOLU
43243	4B1a - Dairy	3.A.2.a.i - Dairy cows	METHANE	1996 IPCC default	Manure Management Emission Factor	About half of cattle manure is used for fuel with the remainder managed in dry systems.	Annual Average temperature is less than 15 C	Climate: Cool; Region: Indian Subcontinent			5	kg/head/yr	Equation 4.15 on Page 4.30 of the IPCC Good Practice Guidance and Uncertainty Management in National Greenhouse Gas Inventories	Worksheet 4-1, Sheet 1 of 2	Crutzen, P.J., I. Aselmann and W. Seiler (1986), "Methane Production by Domestic Animals, Wild Ruminants, Other Herbivorous Fauna, and Humans," Tellus 38B:271-284 Gibbs, M.J. and D.E. Johnson (1993), "Livestock Emissions." In: International Methane Emissions, US Environmental Protection Agency, Climate Change Division, Washington, D.C., U.S.A Safley, L.M., M.E. Casada, J.W. Woodbury, and K.F. Roo…	Revised 1996 IPCC Guidelines for National Greenhouse Gas Inventories (Table 4-6 on Page 4.13 of the Reference Manual)	IPCC	5	0.570776	Component	AFOLU
43244	4B1a - Dairy	3.A.2.a.i - Dairy cows	METHANE	1996 IPCC default	Manure Management Emission Factor	About half of cattle manure is used for fuel with the remainder managed in dry systems.	Annual Average temperature is between 15 C and 25 C	Climate: Temp; Region: Indian Subcontinent			5	kg/head/yr	Equation 4.15 on Page 4.30 of the IPCC Good Practice Guidance and Uncertainty Management in National Greenhouse Gas Inventories	Worksheet 4-1, Sheet 1 of 2	Crutzen, P.J., I. Aselmann and W. Seiler (1986), "Methane Production by Domestic Animals, Wild Ruminants, Other Herbivorous Fauna, and Humans," Tellus 38B:271-284 Gibbs, M.J. and D.E. Johnson (1993), "Livestock Emissions." In: International Methane Emissions, US Environmental Protection Agency, Climate Change Division, Washington, D.C., U.S.A Safley, L.M., M.E. Casada, J.W. Woodbury, and K.F. Roo…	Revised 1996 IPCC Guidelines for National Greenhouse Gas Inventories (Table 4-6 on Page 4.13 of the Reference Manual)	IPCC	5	0.570776	Component	AFOLU
43245	4B1a - Dairy	3.A.2.a.i - Dairy cows	METHANE	1996 IPCC default	Manure Management Emission Factor	About half of cattle manure is used for fuel with the remainder managed in dry systems.	Annual Average temperature is greater than 25 C	Climate: Warm; Region: Indian Subcontinent			6	kg/head/yr	Equation 4.15 on Page 4.30 of the IPCC Good Practice Guidance and Uncertainty Management in National Greenhouse Gas Inventories	Worksheet 4-1, Sheet 1 of 2	Crutzen, P.J., I. Aselmann and W. Seiler (1986), "Methane Production by Domestic Animals, Wild Ruminants, Other Herbivorous Fauna, and Humans," Tellus 38B:271-284 Gibbs, M.J. and D.E. Johnson (1993), "Livestock Emissions." In: International Methane Emissions, US Environmental Protection Agency, Climate Change Division, Washington, D.C., U.S.A Safley, L.M., M.E. Casada, J.W. Woodbury, and K.F. Roo…	Revised 1996 IPCC Guidelines for National Greenhouse Gas Inventories (Table 4-6 on Page 4.13 of the Reference Manual)	IPCC	6	0.684932	Component	AFOLU
43246	4B1b - Non-Dairy	3.A.2.a.ii - Other cattle	METHANE	1996 IPCC default	Manure Management Emission Factor	About half of cattle manure is used for fuel with the remainder managed in dry systems.	Annual Average temperature is less than 15 C	Climate: Cool; Region: Indian Subcontinent			2	kg/head/yr	Equation 4.15 on Page 4.30 of the IPCC Good Practice Guidance and Uncertainty Management in National Greenhouse Gas Inventories	Worksheet 4-1, Sheet 1 of 2	Crutzen, P.J., I. Aselmann and W. Seiler (1986), "Methane Production by Domestic Animals, Wild Ruminants, Other Herbivorous Fauna, and Humans," Tellus 38B:271-284 Gibbs, M.J. and D.E. Johnson (1993), "Livestock Emissions." In: International Methane Emissions, US Environmental Protection Agency, Climate Change Division, Washington, D.C., U.S.A Safley, L.M., M.E. Casada, J.W. Woodbury, and K.F. Roo…	Revised 1996 IPCC Guidelines for National Greenhouse Gas Inventories (Table 4-6 on Page 4.13 of the Reference Manual)	IPCC	2	0.228311	Component	AFOLU
43247	4B1b - Non-Dairy	3.A.2.a.ii - Other cattle	METHANE	1996 IPCC default	Manure Management Emission Factor	About half of cattle manure is used for fuel with the remainder managed in dry systems.	Annual Average temperature is between 15 C and 25 C	Climate: Temp; Region: Indian Subcontinent			2	kg/head/yr	Equation 4.15 on Page 4.30 of the IPCC Good Practice Guidance and Uncertainty Management in National Greenhouse Gas Inventories	Worksheet 4-1, Sheet 1 of 2	Crutzen, P.J., I. Aselmann and W. Seiler (1986), "Methane Production by Domestic Animals, Wild Ruminants, Other Herbivorous Fauna, and Humans," Tellus 38B:271-284 Gibbs, M.J. and D.E. Johnson (1993), "Livestock Emissions." In: International Methane Emissions, US Environmental Protection Agency, Climate Change Division, Washington, D.C., U.S.A Safley, L.M., M.E. Casada, J.W. Woodbury, and K.F. Roo…	Revised 1996 IPCC Guidelines for National Greenhouse Gas Inventories (Table 4-6 on Page 4.13 of the Reference Manual)	IPCC	2	0.228311	Component	AFOLU
43248	4B1b - Non-Dairy	3.A.2.a.ii - Other cattle	METHANE	1996 IPCC default	Manure Management Emission Factor	About half of cattle manure is used for fuel with the remainder managed in dry systems.	Annual Average temperature is greater than 25 C	Climate: Warm; Region: Indian Subcontinent			2	kg/head/yr	Equation 4.15 on Page 4.30 of the IPCC Good Practice Guidance and Uncertainty Management in National Greenhouse Gas Inventories	Worksheet 4-1, Sheet 1 of 2	Crutzen, P.J., I. Aselmann and W. Seiler (1986), "Methane Production by Domestic Animals, Wild Ruminants, Other Herbivorous Fauna, and Humans," Tellus 38B:271-284 Gibbs, M.J. and D.E. Johnson (1993), "Livestock Emissions." In: International Methane Emissions, US Environmental Protection Agency, Climate Change Division, Washington, D.C., U.S.A Safley, L.M., M.E. Casada, J.W. Woodbury, and K.F. Roo…	Revised 1996 IPCC Guidelines for National Greenhouse Gas Inventories (Table 4-6 on Page 4.13 of the Reference Manual)	IPCC	2	0.228311	Component	AFOLU
43249	4B8 - Swine	3.A.2.h - Swine	METHANE	1996 IPCC default	Manure Management Emission Factor	About one-third of swine manure is managed as a liquid.	Annual Average temperature is less than 15 C	Climate: Cool; Region: Indian Subcontinent	-	-	3	kg/head/yr	Equation 4.15 on Page 4.30 of the IPCC Good Practice Guidance and Uncertainty Management in National Greenhouse Gas Inventories	Worksheet 4-1, Sheet 1 of 2	Crutzen, P.J., I. Aselmann and W. Seiler (1986), "Methane Production by Domestic Animals, Wild Ruminants, Other Herbivorous Fauna, and Humans," Tellus 38B:271-284 Safley, L.M., M.E. Casada, J.W. Woodbury, and K.F. Roos (1992), Global Methane Emissions from Livestock and Poultry Manure. US Environmental Protection Agency, Global Change Division, Washington, D.C., February 1992, EPA/400/1091/048. W…	Revised 1996 IPCC Guidelines for National Greenhouse Gas Inventories (Table 4-6 on Page 4.13 of the Reference Manual)	IPCC	3	0.342466	Component	AFOLU
43250	4B8 - Swine	3.A.2.h - Swine	METHANE	1996 IPCC default	Manure Management Emission Factor	About one-third of swine manure is managed as a liquid.	Annual Average temperature is between 15 C and 25 C	Climate: Temp; Region: Indian Subcontinent			4	kg/head/yr	Equation 4.15 on Page 4.30 of the IPCC Good Practice Guidance and Uncertainty Management in National Greenhouse Gas Inventories	Worksheet 4-1, Sheet 1 of 2	Crutzen, P.J., I. Aselmann and W. Seiler (1986), "Methane Production by Domestic Animals, Wild Ruminants, Other Herbivorous Fauna, and Humans," Tellus 38B:271-284 Safley, L.M., M.E. Casada, J.W. Woodbury, and K.F. Roos (1992), Global Methane Emissions from Livestock and Poultry Manure. US Environmental Protection Agency, Global Change Division, Washington, D.C., February 1992, EPA/400/1091/048. W…	Revised 1996 IPCC Guidelines for National Greenhouse Gas Inventories (Table 4-6 on Page 4.13 of the Reference Manual)	IPCC	4	0.456621	Component	AFOLU
43251	4B8 - Swine	3.A.2.h - Swine	METHANE	1996 IPCC default	Manure Management Emission Factor	About one-third of swine manure is managed as a liquid.	Annual Average temperature is greater than 25 C	Climate: Warm; Region: Indian Subcontinent			6	kg/head/yr	Equation 4.15 on Page 4.30 of the IPCC Good Practice Guidance and Uncertainty Management in National Greenhouse Gas Inventories	Worksheet 4-1, Sheet 1 of 2	Crutzen, P.J., I. Aselmann and W. Seiler (1986), "Methane Production by Domestic Animals, Wild Ruminants, Other Herbivorous Fauna, and Humans," Tellus 38B:271-284 Safley, L.M., M.E. Casada, J.W. Woodbury, and K.F. Roos (1992), Global Methane Emissions from Livestock and Poultry Manure. US Environmental Protection Agency, Global Change Division, Washington, D.C., February 1992, EPA/400/1091/048. W…	Revised 1996 IPCC Guidelines for National Greenhouse Gas Inventories (Table 4-6 on Page 4.13 of the Reference Manual)	IPCC	6	0.684932	Component	AFOLU
43252	4B2 - Buffalo	3.A.2.b - Buffalo	METHANE	1996 IPCC default	Manure Management Emission Factor	About half of buffalo manure is used for fuel with the remainder managed in dry systems.	Annual Average temperature is less than 15 C	Climate: Cool; Region: Indian Subcontinent			4	kg/head/yr	Equation 4.15 on Page 4.30 of the IPCC Good Practice Guidance and Uncertainty Management in National Greenhouse Gas Inventories	Worksheet 4-1, Sheet 1 of 2	Crutzen, P.J., I. Aselmann and W. Seiler (1986), "Methane Production by Domestic Animals, Wild Ruminants, Other Herbivorous Fauna, and Humans," Tellus 38B:271-284 Gibbs, M.J. and D.E. Johnson (1993), "Livestock Emissions." In: International Methane Emissions, US Environmental Protection Agency, Climate Change Division, Washington, D.C., U.S.A Safley, L.M., M.E. Casada, J.W. Woodbury, and K.F. Roo…	Revised 1996 IPCC Guidelines for National Greenhouse Gas Inventories (Table 4-6 on Page 4.13 of the Reference Manual)	IPCC	4	0.456621	Component	AFOLU
43253	4B2 - Buffalo	3.A.2.b - Buffalo	METHANE	1996 IPCC default	Manure Management Emission Factor	About half of buffalo manure is used for fuel with the remainder managed in dry systems.	Annual Average temperature is between 15 C and 25 C	Climate: Temp; Region: Indian Subcontinent			5	kg/head/yr	Equation 4.15 on Page 4.30 of the IPCC Good Practice Guidance and Uncertainty Management in National Greenhouse Gas Inventories	Worksheet 4-1, Sheet 1 of 2	Crutzen, P.J., I. Aselmann and W. Seiler (1986), "Methane Production by Domestic Animals, Wild Ruminants, Other Herbivorous Fauna, and Humans," Tellus 38B:271-284 Gibbs, M.J. and D.E. Johnson (1993), "Livestock Emissions." In: International Methane Emissions, US Environmental Protection Agency, Climate Change Division, Washington, D.C., U.S.A Safley, L.M., M.E. Casada, J.W. Woodbury, and K.F. Roo…	Revised 1996 IPCC Guidelines for National Greenhouse Gas Inventories (Table 4-6 on Page 4.13 of the Reference Manual)	IPCC	5	0.570776	Component	AFOLU
43254	4B2 - Buffalo	3.A.2.b - Buffalo	METHANE	1996 IPCC default	Manure Management Emission Factor	About half of buffalo manure is used for fuel with the remainder managed in dry systems.	Annual Average temperature is greater than 25 C	Climate: Warm; Region: Indian Subcontinent			5	kg/head/yr	Equation 4.15 on Page 4.30 of the IPCC Good Practice Guidance and Uncertainty Management in National Greenhouse Gas Inventories	Worksheet 4-1, Sheet 1 of 2	Crutzen, P.J., I. Aselmann and W. Seiler (1986), "Methane Production by Domestic Animals, Wild Ruminants, Other Herbivorous Fauna, and Humans," Tellus 38B:271-284 Gibbs, M.J. and D.E. Johnson (1993), "Livestock Emissions." In: International Methane Emissions, US Environmental Protection Agency, Climate Change Division, Washington, D.C., U.S.A Safley, L.M., M.E. Casada, J.W. Woodbury, and K.F. Roo…	Revised 1996 IPCC Guidelines for National Greenhouse Gas Inventories (Table 4-6 on Page 4.13 of the Reference Manual)	IPCC	5	0.570776	Component	AFOLU
410574	4A1a - Dairy	3.A.1.a.i - Dairy Cows	METHANE	Modeled	Enteric fermentation emission factor for dairy cow	Commercialised milk production using high quality forage. During grazing season as follows: grazed grass, barley/oat and concentrates (rape, crushed grain). During winter season: Silage, barley/oat, concentrates (rape and molasses). Grazing season is 120	Dairy cow,adult female. National gross energy intake (GE), IPCC default methane conversion rate (Ym); average milk production 7445 kg/head/year, life weight 550 kg, fat content of milk 4.22 %	Finland, Boreal region	Abatement/control techniques like feed additives, vaccines or alternative feeds not included in calculations		115.22	kg/head/yr	Equation 4.12, Page 4.25 in IPCC Good Practice Guidance and Uncertainty Management in National Greenhouse Gas Inventories	Worksheet 4-1, Sheet 1 of 2		National Inventory Report (Annex I)	Finnish Environment Institute, Finland	115.22	13.153	Component	AFOLU
410581	4B13 - Other (please specify)	3.A.2.j - Other (please specify)	METHANE	Modeled	Manure management emission factor for calf (young cow)	Slurry-based system (26%), pasture (33%) and solid storage (42%)included.	National gross energy intake 82,4 MJ/head/day(GE), Digestible Energy (DE) 70% and Manure System (MS); IPCC default ash content of manure, Methane Producing Potential (Bo)and Methane Conversion Factor (MCF); age under 1 year, weight 218 kg	Finland, Boreal region	No abatement/control technologies e.g. anaerobic digester or diet modifications included.		1.69	kg/head/yr	Equation 4.15, page 4.30 in IPCC Good Practice Guidance and Uncertainty Management in National Greenhouse Gas Inventories	Worksheet 4-1, Sheet 1 of 2	Finland`s National Inventory Report 2006, Pipatti, R. 2001. Greenhouse Gas Emissions and Removals in Finland. VTT Research Notes 2094. Technical Research Centre of Finland.	National Inventory Report (Annex I)	Finnish Environment Institute, Finland	1.69	0.192922	Component	AFOLU
410585	4B1a - Dairy	3.A.2.a.i - Dairy cows	METHANE	Modeled	Manure management emission factor for dairy cow	Slurry-based system (28%), pasture (28%)and solid storage (44%)included.	National gross energy intake 300.2 MJ/head/day(GE), Digestible Energy (DE)70% and Manure system (MS); IPCC default ash content of manure, Methane Producing Potential (Bo)and Methane Conversion Factor (MCF); average milk production 7626 kg/animal/year, weight 568 kg	Finland, Boreal region	No abatement/control technologies e.g. anaerobic digester or diet modifications included.		9.37	kg/head/yr	Equation 4.15, page 4.30 in IPCC Good Practice Guidance and Uncertainty Management in National Greenhouse Gas Inventories	Worksheet 4-1, Sheet 1 of 2	Finland`s National Inventory Report 2006, Pipatti, R. 2001. Greenhouse Gas Emissions and Removals in Finland. VTT Research Notes 2094. Technical Research Centre of Finland.	National Inventory Report (Annex I)	Finnish Environment Institute, Finland	9.37	1.06963	Component	AFOLU
410586	4A10 - Other (please specify)	3.A.1.j - Other (please specify)	METHANE	Modeled	Enteric fermentation emission factor for calf (male and female).	Commercialised milk production using high quality forage for dairy cows: during grazing season as follows: grazed grass, barley/oat and concentrates (rape, crushed grain). During winter season: Silage, barley/oat, concentrates (rape and molasses). Grazing	Young calf (male and female).National gross energy intake (GE), IPCC default Methane Conversion Rate(Ym); age under 1 year, live weight 218 kg, mature weight 653 kg (dairy cow), 994 kg (bull), 704 kg (suckler cow), average daily weight gain 0.85 kg, diges	Finland, Boreal region,Climate: northern boreal, average annual temperature -2..+5 Celcius degrees, preciptation 500-650 mm/yr	Abatement/control techniques like feed additives, vaccines or alternative feeds not included in calculations		32.41	kg/head/yr	Equation 4.12, Page 4.25 in IPCC Good Practice Guidance and Uncertainty Management in National Greenhouse Gas Inventories			National Inventory Report (Annex I)	Finnish Environment Institute, Finland	32.41	3.69977	Component	AFOLU
410631	4A1b - Non-Dairy	3.A.1.a.ii - Other Cattle	METHANE	Modeled	Enteric fermentation emission factor for adult female cow (mother cow).	Commercialised meat production using high quality forage. During grazing season as follows: grazed grass, barley/oat and concentrates (rape, crushed grain). During winter season: Silage, barley/oat, concentrates (rape and molasses). Grazing season is 120	Adult female (mother cow). National gross energy intake 167.9 MJ/head/day(GE), IPCC default Methane Conversion Rate 0.06 (Ym), average milk production 1620 kg/head /year, life weight 650 kg, fat content of milk 4.24 %, mature weight 750 kg, DE 70 %	Finland, Boreal	Abatement/control techniques like feed additives, vaccines or alternative feeds not included in calculations		66.04	kg/head/yr	Equation 4.12, Page 4.25 in IPCC Good Practice Guidance and Uncertainty Management in National Greenhouse Gas Inventories	Worksheet 4-1, Sheet 1 of 2		National Inventory Report (Annex I)	Finnish Environment Institute, Finland	66.04	7.53881	Component	AFOLU
410632	4A1b - Non-Dairy	3.A.1.a.ii - Other Cattle	METHANE	Modeled	Enteric fermentation emission factor for young female cow (heifer)	Commercialised meat production using high quality forage. During grazing season as follows: grazed grass, barley/oat and concentrates (rape, crushed grain). During winter season: Silage, barley/oat, concentrates (rape and molasses). Grazing season is 120 days	Young female cow (heifer). National gross energy intake 143,7 MJ/head/year(GE), National DE (70%) IPCC default Methane Conversion Rate (Ym); live weight 437 kg	Finland, Boreal, Climate: northern boreal, average annual temperature -2..+5 Celcius degrees, precipitation 500-650 mm/yr.	Abatement/control techniques like feed additives, vaccines or alternative feeds not included in calculations		56.56	kg/head/yr	Equation 4.12, Page 4.25 in IPCC Good Practice Guidance and Uncertainty Management in National Greenhouse Gas Inventories	Worksheet 4-1, Sheet 1 of 2		National Inventory Report (Annex I)	Finnish Environment Institute, Finland	56.56	6.45662	Component	AFOLU
410633	4A1b - Non-Dairy	3.A.1.a.ii - Other Cattle	METHANE	Modeled	Enteric fermentation emission factor for young male cow (bull).	Commercialised meat production.	Young male cow (bull. National gross energy intake 152.8 MJ/head/day(GE), IPCC default Methane Conversion Rate 0.06(Ym); age over 1 year, life weight 500 kg, mature weight 750 kg, DE 70%	Finland, Boreal, Climate: northern boreal, average annual temperature -2..+5 Celcius degrees, precipitation 500-650 mm/yr.	Abatement/control techniques like feed additives, vaccines or alternative feeds not included in calculations		60.15	kg/head/yr	Equation 4.12, Page 4.25 in IPCC Good Practice Guidance and Uncertainty Management in National Greenhouse Gas Inventories	Worksheet 4-1, Sheet 1 of 2		National Inventory Report (Annex I)	Finnish Environment Institute, Finland	60.15	6.86644	Component	AFOLU
410634	4B1b - Non-Dairy	3.A.2.a.ii - Other cattle	METHANE	Modeled	Manure management emission factor for bull (cattle)	Slurry-based system (40%), pasture (0%)and solid storage (60%)included.	National gross energy intake 157,9 MJ/head/day(GE), Digestible Energy (DE) 70% and Manure System (MS); IPCC default ash content of manure, Methane Producing Potential (Bo) and Methane conversion Factor (MCF); age over 1 year, weight 552 kg	Finland, Boreal	No abatement/control technologies e.g. anaerobic digester or diet modifications included.		4.52	kg/head/yr	Equation 4.15, page 4.30 in IPCC Good Practice Guidance and Uncertainty Management in National Greenhouse Gas Inventories	Worksheet 4-1, Sheet 1 of 2	Finland`s National Inventory Report 2006, Pipatti, R. 2001. Greenhouse Gas Emissions and Removals in Finland. VTT Research Notes 2094. Technical Research Centre of Finland.	National Inventory Report (Annex I)	Finnish Environment Institute, Finland	4.52	0.515982	Component	AFOLU
410635	4B1b - Non-Dairy	3.A.2.a.ii - Other cattle	METHANE	Modeled	Manure management emission factor for heifer (young cow)	Slurry-based system (24%), pasture (33%)and solid storage (43%)included.	National gross energy intake 143,7 MJ/head/day(GE), Digestible Energy (DE) 70% and Manure System (MS); IPCC default ash content of manure, Methane Producing Potential (Bo) and Methane Conversion Factor (MCF); weight 437 kg	Finland, Boreal	No abatement/control technologies e.g. anaerobic digester or diet modifications included.		2.84	kg/head/yr	Equation 4.15, page 4.30 in IPCC Good Practice Guidance and Uncertainty Management in National Greenhouse Gas Inventories	Worksheet 4-1, Sheet 1 of 2	Finland`s National Inventory Report 2006, Pipatti, R. 2001. Greenhouse Gas Emissions and Removals in Finland. VTT Research Notes 2094. Technical Research Centre of Finland.	National Inventory Report (Annex I)	Finnish Environment Institute, Finland	2.84	0.324201	Component	AFOLU
410636	4B1b - Non-Dairy	3.A.2.a.ii - Other cattle	METHANE	Modeled	Manure management emission factor for suckler cow (cattle)	Slurry-based system (16%), pasture (36%)and solid storage (48%)included.	National gross energy intake 167,5(GE), Digestible Energy (DE) 70% and Manure System (MS); IPCC default ash content of manure, Methane Producing Potential (Bo) and Methane Conversion Factor (MCF); average milk production 1620 kg/head/year, weight 648 kg	Finland, Boreal	No abatement/control technologies e.g. anaerobic digester or diet modifications included.		2.56	kg/head/yr	Equation 4.15, page 4.30 in IPCC Good Practice Guidance and Uncertainty Management in National Greenhouse Gas Inventories	Worksheet 4-1, Sheet 1 of 2	Finland`s National Inventory Report 2006, Pipatti, R. 2001. Greenhouse Gas Emissions and Removals in Finland. VTT Research Notes 2094. Technical Research Centre of Finland.	National Inventory Report (Annex I)	Finnish Environment Institute, Finland	2.56	0.292237	Component	AFOLU
415917	4A - Enteric Fermentation	3.A.1 - Enteric Fermentation	METHANE	2006 IPCC default	Enteric fermentation emission factors for Tier 1 method		Animal category: Buffalo (liveweight = 300 kg)	Country type: Developed country			55	kg CH4/head/yr	Equation 10.19 in Volume 4 of the 2006 IPCC Guidelines for National Greenhouse Gas Inventories	Sheet 1 of 1, Category Code 3A1, Page A1.7 of Volume 4 of the 2006 IPCC Guidelines	Gibbs, M.J. and Johnson, D.E. (1993). "Livestock Emissions." In: International Methane Emissions, US Environmental Protection Agency, Climate Change Division, Washington, D.C., U.S.A.	2006 IPCC Guidelines for National Greenhouse Gas Inventories, Volume 4, Table 10.10 - Enteric fermentation emission factors for Tier 1 method, on page 10.28	IPCC	55	6.27854	Component	AFOLU
415918	4A - Enteric Fermentation	3.A.1 - Enteric Fermentation	METHANE	2006 IPCC default	Enteric fermentation emission factors for Tier 1 method		Animal category: Sheep (liveweight = 65 kg)	Country type: Developed country			8	kg CH4/head/yr	Equation 10.19 in Volume 4 of the 2006 IPCC Guidelines for National Greenhouse Gas Inventories	Sheet 1 of 1, Category Code 3A1, Page A1.7 of Volume 4 of the 2006 IPCC Guidelines	Crutzen, P.J., Aselmann, I. and Seiler, W. (1986). "Methane Production by Domestic Animals, Wild Ruminants, Other Herbivorous Fauna, and Humans," Tellus 38B:271-284.	2006 IPCC Guidelines for National Greenhouse Gas Inventories, Volume 4, Table 10.10 - Enteric fermentation emission factors for Tier 1 method, on page 10.28	IPCC	8	0.913242	Component	AFOLU
415919	4A - Enteric Fermentation	3.A.1 - Enteric Fermentation	METHANE	2006 IPCC default	Enteric fermentation emission factors for Tier 1 method		Animal category: Goats (liveweight = 40 kg)	Country type: Developed country			5	kg CH4/head/yr	Equation 10.19 in Volume 4 of the 2006 IPCC Guidelines for National Greenhouse Gas Inventories	Sheet 1 of 1, Category Code 3A1, Page A1.7 of Volume 4 of the 2006 IPCC Guidelines	Crutzen, P.J., Aselmann, I. and Seiler, W. (1986). "Methane Production by Domestic Animals, Wild Ruminants, Other Herbivorous Fauna, and Humans," Tellus 38B:271-284.	2006 IPCC Guidelines for National Greenhouse Gas Inventories, Volume 4, Table 10.10 - Enteric fermentation emission factors for Tier 1 method, on page 10.28	IPCC	5	0.570776	Component	AFOLU
415920	4A - Enteric Fermentation	3.A.1 - Enteric Fermentation	METHANE	2006 IPCC default	Enteric fermentation emission factors for Tier 1 method		Animal category: Camels (liveweight = 570 kg)	Country type: Developed country			46	kg CH4/head/yr	Equation 10.19 in Volume 4 of the 2006 IPCC Guidelines for National Greenhouse Gas Inventories	Sheet 1 of 1, Category Code 3A1, Page A1.7 of Volume 4 of the 2006 IPCC Guidelines	Gibbs, M.J. and Johnson, D.E. (1993). "Livestock Emissions." In: International Methane Emissions, US Environmental Protection Agency, Climate Change Division, Washington, D.C., U.S.A.	2006 IPCC Guidelines for National Greenhouse Gas Inventories, Volume 4, Table 10.10 - Enteric fermentation emission factors for Tier 1 method, on page 10.28	IPCC	46	5.25114	Component	AFOLU
415921	4A - Enteric Fermentation	3.A.1 - Enteric Fermentation	METHANE	2006 IPCC default	Enteric fermentation emission factors for Tier 1 method		Animal category: Horses (liveweight = 550 kg)	Country type: Developed country			18	kg CH4/head/yr	Equation 10.19 in Volume 4 of the 2006 IPCC Guidelines for National Greenhouse Gas Inventories	Sheet 1 of 1, Category Code 3A1, Page A1.7 of Volume 4 of the 2006 IPCC Guidelines	Crutzen, P.J., Aselmann, I. and Seiler, W. (1986). "Methane Production by Domestic Animals, Wild Ruminants, Other Herbivorous Fauna, and Humans," Tellus 38B:271-284.	2006 IPCC Guidelines for National Greenhouse Gas Inventories, Volume 4, Table 10.10 - Enteric fermentation emission factors for Tier 1 method, on page 10.28	IPCC	18	2.05479	Component	AFOLU
415922	4A - Enteric Fermentation	3.A.1 - Enteric Fermentation	METHANE	2006 IPCC default	Enteric fermentation emission factors for Tier 1 method		Animal category: Mules and Asses (liveweight = 245 kg)	Country type: Developed country			10	kg CH4/head/yr	Equation 10.19 in Volume 4 of the 2006 IPCC Guidelines for National Greenhouse Gas Inventories	Sheet 1 of 1, Category Code 3A1, Page A1.7 of Volume 4 of the 2006 IPCC Guidelines	Crutzen, P.J., Aselmann, I. and Seiler, W. (1986). "Methane Production by Domestic Animals, Wild Ruminants, Other Herbivorous Fauna, and Humans," Tellus 38B:271-284.	2006 IPCC Guidelines for National Greenhouse Gas Inventories, Volume 4, Table 10.10 - Enteric fermentation emission factors for Tier 1 method, on page 10.28	IPCC	10	1.14155	Component	AFOLU
415923	4A - Enteric Fermentation	3.A.1 - Enteric Fermentation	METHANE	2006 IPCC default	Enteric fermentation emission factors for Tier 1 method		Animal category: Deer (liveweight = 120 kg)	Country type: Developed country			20	kg CH4/head/yr	Equation 10.19 in Volume 4 of the 2006 IPCC Guidelines for National Greenhouse Gas Inventories	Sheet 1 of 1, Category Code 3A1, Page A1.7 of Volume 4 of the 2006 IPCC Guidelines	Clark, H., Brookes, I. and Walcroft, A. (2003). Enteric methane emissions from New Zealand ruminants 1999-2001 calculated using an IPCC Tier 2 approach. http://www.climatechange.govt.nz/resources/reports/nir-apr03/.	2006 IPCC Guidelines for National Greenhouse Gas Inventories, Volume 4, Table 10.10 - Enteric fermentation emission factors for Tier 1 method, on page 10.28	IPCC	20	2.28311	Component	AFOLU
415924	4A - Enteric Fermentation	3.A.1 - Enteric Fermentation	METHANE	2006 IPCC default	Enteric fermentation emission factors for Tier 1 method		Animal category: Alpacas (liveweight = 65 kg)	Country type: Developed country			8	kg CH4/head/yr	Equation 10.19 in Volume 4 of the 2006 IPCC Guidelines for National Greenhouse Gas Inventories	Sheet 1 of 1, Category Code 3A1, Page A1.7 of Volume 4 of the 2006 IPCC Guidelines	Pinares-Patino, C.S., Ulyatt, M.J., Waghorn, G.C., Lassey, K.R., Barry, T.N., Holmes, C.W. and Johnson, D.E. (2003). Methane emission by alpaca and sheep fed on Lucerne hay or grazed on pastures of perennial ryegrass/white clover or birds foot trefoil. J. Agric. Sci. 140:215-226.	2006 IPCC Guidelines for National Greenhouse Gas Inventories, Volume 4, Table 10.10 - Enteric fermentation emission factors for Tier 1 method, on page 10.28	IPCC	8	0.913242	Component	AFOLU
415925	4A - Enteric Fermentation	3.A.1 - Enteric Fermentation	METHANE	2006 IPCC default	Enteric fermentation emission factors for Tier 1 method		Animal category: Swine	Country type: Developed country			1.5	kg CH4/head/yr	Equation 10.19 in Volume 4 of the 2006 IPCC Guidelines for National Greenhouse Gas Inventories	Sheet 1 of 1, Category Code 3A1, Page A1.7 of Volume 4 of the 2006 IPCC Guidelines	Crutzen, P.J., Aselmann, I. and Seiler, W. (1986). "Methane Production by Domestic Animals, Wild Ruminants, Other Herbivorous Fauna, and Humans," Tellus 38B:271-284.	2006 IPCC Guidelines for National Greenhouse Gas Inventories, Volume 4, Table 10.10 - Enteric fermentation emission factors for Tier 1 method, on page 10.28	IPCC	1.5	0.171233	Component	AFOLU
415926	4A - Enteric Fermentation	3.A.1 - Enteric Fermentation	METHANE	2006 IPCC default	Enteric fermentation emission factors for Tier 1 method		Animal category: Buffalo (liveweight = 300 kg)	Country type: Developing country			55	kg CH4/head/yr	Equation 10.19 in Volume 4 of the 2006 IPCC Guidelines for National Greenhouse Gas Inventories	Sheet 1 of 1, Category Code 3A1, Page A1.7 of Volume 4 of the 2006 IPCC Guidelines	Gibbs, M.J. and Johnson, D.E. (1993). "Livestock Emissions." In: International Methane Emissions, US Environmental Protection Agency, Climate Change Division, Washington, D.C., U.S.A.	2006 IPCC Guidelines for National Greenhouse Gas Inventories, Volume 4, Table 10.10 - Enteric fermentation emission factors for Tier 1 method, on page 10.28	IPCC	55	6.27854	Component	AFOLU
415927	4A - Enteric Fermentation	3.A.1 - Enteric Fermentation	METHANE	2006 IPCC default	Enteric fermentation emission factors for Tier 1 method		Animal category: Sheep (liveweight = 45 kg)	Country type: Developing country			5	kg CH4/head/yr	Equation 10.19 in Volume 4 of the 2006 IPCC Guidelines for National Greenhouse Gas Inventories	Sheet 1 of 1, Category Code 3A1, Page A1.7 of Volume 4 of the 2006 IPCC Guidelines	Crutzen, P.J., Aselmann, I. and Seiler, W. (1986). "Methane Production by Domestic Animals, Wild Ruminants, Other Herbivorous Fauna, and Humans," Tellus 38B:271-284.	2006 IPCC Guidelines for National Greenhouse Gas Inventories, Volume 4, Table 10.10 - Enteric fermentation emission factors for Tier 1 method, on page 10.28	IPCC	5	0.570776	Component	AFOLU
415928	4A - Enteric Fermentation	3.A.1 - Enteric Fermentation	METHANE	2006 IPCC default	Enteric fermentation emission factors for Tier 1 method		Animal category: Goats (liveweight = 40 kg)	Country type: Developing country			5	kg CH4/head/yr	Equation 10.19 in Volume 4 of the 2006 IPCC Guidelines for National Greenhouse Gas Inventories	Sheet 1 of 1, Category Code 3A1, Page A1.7 of Volume 4 of the 2006 IPCC Guidelines	Crutzen, P.J., Aselmann, I. and Seiler, W. (1986). "Methane Production by Domestic Animals, Wild Ruminants, Other Herbivorous Fauna, and Humans," Tellus 38B:271-284.	2006 IPCC Guidelines for National Greenhouse Gas Inventories, Volume 4, Table 10.10 - Enteric fermentation emission factors for Tier 1 method, on page 10.28	IPCC	5	0.570776	Component	AFOLU
415929	4A - Enteric Fermentation	3.A.1 - Enteric Fermentation	METHANE	2006 IPCC default	Enteric fermentation emission factors for Tier 1 method		Animal category: Camels (liveweight = 570 kg)	Country type: Developing country			46	kg CH4/head/yr	Equation 10.19 in Volume 4 of the 2006 IPCC Guidelines for National Greenhouse Gas Inventories	Sheet 1 of 1, Category Code 3A1, Page A1.7 of Volume 4 of the 2006 IPCC Guidelines	Gibbs, M.J. and Johnson, D.E. (1993). "Livestock Emissions." In: International Methane Emissions, US Environmental Protection Agency, Climate Change Division, Washington, D.C., U.S.A.	2006 IPCC Guidelines for National Greenhouse Gas Inventories, Volume 4, Table 10.10 - Enteric fermentation emission factors for Tier 1 method, on page 10.28	IPCC	46	5.25114	Component	AFOLU
415930	4A - Enteric Fermentation	3.A.1 - Enteric Fermentation	METHANE	2006 IPCC default	Enteric fermentation emission factors for Tier 1 method		Animal category: Horses (liveweight = 550 kg)	Country type: Developing country			18	kg CH4/head/yr	Equation 10.19 in Volume 4 of the 2006 IPCC Guidelines for National Greenhouse Gas Inventories	Sheet 1 of 1, Category Code 3A1, Page A1.7 of Volume 4 of the 2006 IPCC Guidelines	Crutzen, P.J., Aselmann, I. and Seiler, W. (1986). "Methane Production by Domestic Animals, Wild Ruminants, Other Herbivorous Fauna, and Humans," Tellus 38B:271-284.	2006 IPCC Guidelines for National Greenhouse Gas Inventories, Volume 4, Table 10.10 - Enteric fermentation emission factors for Tier 1 method, on page 10.28	IPCC	18	2.05479	Component	AFOLU
415931	4A - Enteric Fermentation	3.A.1 - Enteric Fermentation	METHANE	2006 IPCC default	Enteric fermentation emission factors for Tier 1 method		Animal category: Mules and Asses (liveweight = 245 kg)	Country type: Developing country			10	kg CH4/head/yr	Equation 10.19 in Volume 4 of the 2006 IPCC Guidelines for National Greenhouse Gas Inventories	Sheet 1 of 1, Category Code 3A1, Page A1.7 of Volume 4 of the 2006 IPCC Guidelines	Crutzen, P.J., Aselmann, I. and Seiler, W. (1986). "Methane Production by Domestic Animals, Wild Ruminants, Other Herbivorous Fauna, and Humans," Tellus 38B:271-284.	2006 IPCC Guidelines for National Greenhouse Gas Inventories, Volume 4, Table 10.10 - Enteric fermentation emission factors for Tier 1 method, on page 10.28	IPCC	10	1.14155	Component	AFOLU
415932	4A - Enteric Fermentation	3.A.1 - Enteric Fermentation	METHANE	2006 IPCC default	Enteric fermentation emission factors for Tier 1 method		Animal category: Deer (liveweight = 120 kg)	Country type: Developing country			20	kg CH4/head/yr	Equation 10.19 in Volume 4 of the 2006 IPCC Guidelines for National Greenhouse Gas Inventories	Sheet 1 of 1, Category Code 3A1, Page A1.7 of Volume 4 of the 2006 IPCC Guidelines	Clark, H., Brookes, I. and Walcroft, A. (2003). Enteric methane emissions from New Zealand ruminants 1999-2001 calculated using an IPCC Tier 2 approach. http://www.climatechange.govt.nz/resources/reports/nir-apr03/.	2006 IPCC Guidelines for National Greenhouse Gas Inventories, Volume 4, Table 10.10 - Enteric fermentation emission factors for Tier 1 method, on page 10.28	IPCC	20	2.28311	Component	AFOLU
415933	4A - Enteric Fermentation	3.A.1 - Enteric Fermentation	METHANE	2006 IPCC default	Enteric fermentation emission factors for Tier 1 method		Animal category: Alpacas (liveweight = 65 kg)	Country type: Developing country			8	kg CH4/head/yr	Equation 10.19 in Volume 4 of the 2006 IPCC Guidelines for National Greenhouse Gas Inventories	Sheet 1 of 1, Category Code 3A1, Page A1.7 of Volume 4 of the 2006 IPCC Guidelines	Pinares-Patino, C.S., Ulyatt, M.J., Waghorn, G.C., Lassey, K.R., Barry, T.N., Holmes, C.W. and Johnson, D.E. (2003). Methane emission by alpaca and sheep fed on Lucerne hay or grazed on pastures of perennial ryegrass/white clover or birds foot trefoil. J. Agric. Sci. 140:215-226.	2006 IPCC Guidelines for National Greenhouse Gas Inventories, Volume 4, Table 10.10 - Enteric fermentation emission factors for Tier 1 method, on page 10.28	IPCC	8	0.913242	Component	AFOLU
415934	4A - Enteric Fermentation	3.A.1 - Enteric Fermentation	METHANE	2006 IPCC default	Enteric fermentation emission factors for Tier 1 method		Animal category: Swine	Country type: Developing country			1	kg CH4/head/yr	Equation 10.19 in Volume 4 of the 2006 IPCC Guidelines for National Greenhouse Gas Inventories	Sheet 1 of 1, Category Code 3A1, Page A1.7 of Volume 4 of the 2006 IPCC Guidelines	Crutzen, P.J., Aselmann, I. and Seiler, W. (1986). "Methane Production by Domestic Animals, Wild Ruminants, Other Herbivorous Fauna, and Humans," Tellus 38B:271-284.	2006 IPCC Guidelines for National Greenhouse Gas Inventories, Volume 4, Table 10.10 - Enteric fermentation emission factors for Tier 1 method, on page 10.28	IPCC	1	0.114155	Component	AFOLU
415935	4A - Enteric Fermentation	3.A.1 - Enteric Fermentation	METHANE	2006 IPCC default	Tier 1 enteric fermentation emission factors for Cattle	Highly productive commercialized dairy sector feeding high quality forage and grain. Separate beef cow herd, primarily grazing with feed supplements seasonally. Fast-growing beef steers/heifers finished in feedlots on grain. Dairy cows are a small part of the population.	Animal category: Cattle (Dairy)	Region: North America		Average milk production of 8,400 kg head-1 yr-1.	128	kg CH4/head/yr	Equation 10.19 in Volume 4 of the 2006 IPCC Guidelines for National Greenhouse Gas Inventories	Sheet 1 of 1, Category Code 3A1, Page A1.7 of Volume 4 of the 2006 IPCC Guidelines		2006 IPCC Guidelines for National Greenhouse Gas Inventories, Volume 4, Table 10.11 - Tier 1 enteric fermentation emission factors for Cattle, on page 10.29	IPCC	128	14.6119	Component	AFOLU
415936	4A - Enteric Fermentation	3.A.1 - Enteric Fermentation	METHANE	2006 IPCC default	Tier 1 enteric fermentation emission factors for Cattle	Highly productive commercialized dairy sector feeding high quality forage and grain. Separate beef cow herd, primarily grazing with feed supplements seasonally. Fast-growing beef steers/heifers finished in feedlots on grain. Dairy cows are a small part of the population.	Animal category: Cattle (Other Cattle)	Region: North America		Includes beef cows, bulls, calves, growing steers/heifers, and feedlot cattle.	53	kg CH4/head/yr	Equation 10.19 in Volume 4 of the 2006 IPCC Guidelines for National Greenhouse Gas Inventories	Sheet 1 of 1, Category Code 3A1, Page A1.7 of Volume 4 of the 2006 IPCC Guidelines		2006 IPCC Guidelines for National Greenhouse Gas Inventories, Volume 4, Table 10.11 - Tier 1 enteric fermentation emission factors for Cattle, on page 10.29	IPCC	53	6.05023	Component	AFOLU
415937	4A - Enteric Fermentation	3.A.1 - Enteric Fermentation	METHANE	2006 IPCC default	Tier 1 enteric fermentation emission factors for Cattle	Highly productive commercialised dairy sector feeding high quality forage and grain. Dairy cows also used for beef calf production. Very small dedicated beef cow herd. Minor amount of feedlot feeding with grains.	Animal category: Cattle (Dairy)	Region: Western Europe		Average milk production of 6,000 kg head-1 yr-1.	117	kg CH4/head/yr	Equation 10.19 in Volume 4 of the 2006 IPCC Guidelines for National Greenhouse Gas Inventories	Sheet 1 of 1, Category Code 3A1, Page A1.7 of Volume 4 of the 2006 IPCC Guidelines		2006 IPCC Guidelines for National Greenhouse Gas Inventories, Volume 4, Table 10.11 - Tier 1 enteric fermentation emission factors for Cattle, on page 10.29	IPCC	117	13.3562	Component	AFOLU
415938	4A - Enteric Fermentation	3.A.1 - Enteric Fermentation	METHANE	2006 IPCC default	Tier 1 enteric fermentation emission factors for Cattle	Highly productive commercialised dairy sector feeding high quality forage and grain. Dairy cows also used for beef calf production. Very small dedicated beef cow herd. Minor amount of feedlot feeding with grains.	Animal category: Cattle (Other Cattle)	Region: Western Europe		Includes bulls, calves, and growing steers/heifers.	57	kg CH4/head/yr	Equation 10.19 in Volume 4 of the 2006 IPCC Guidelines for National Greenhouse Gas Inventories	Sheet 1 of 1, Category Code 3A1, Page A1.7 of Volume 4 of the 2006 IPCC Guidelines		2006 IPCC Guidelines for National Greenhouse Gas Inventories, Volume 4, Table 10.11 - Tier 1 enteric fermentation emission factors for Cattle, on page 10.29	IPCC	57	6.50685	Component	AFOLU
415939	4A - Enteric Fermentation	3.A.1 - Enteric Fermentation	METHANE	2006 IPCC default	Tier 1 enteric fermentation emission factors for Cattle	Commercialised dairy sector feeding mostly forages. Separate beef cow herd, primarily grazing. Minor amount of feedlot feeding with grains.	Animal category: Cattle (Dairy)	Region: Eastern Europe		Average milk production of 2,550 kg head-1 yr-1.	99	kg CH4/head/yr	Equation 10.19 in Volume 4 of the 2006 IPCC Guidelines for National Greenhouse Gas Inventories	Sheet 1 of 1, Category Code 3A1, Page A1.7 of Volume 4 of the 2006 IPCC Guidelines		2006 IPCC Guidelines for National Greenhouse Gas Inventories, Volume 4, Table 10.11 - Tier 1 enteric fermentation emission factors for Cattle, on page 10.29	IPCC	99	11.3014	Component	AFOLU
415940	4A - Enteric Fermentation	3.A.1 - Enteric Fermentation	METHANE	2006 IPCC default	Tier 1 enteric fermentation emission factors for Cattle	Commercialised dairy sector feeding mostly forages. Separate beef cow herd, primarily grazing. Minor amount of feedlot feeding with grains.	Animal category: Cattle (Other Cattle)	Region: Eastern Europe		Includes beef cows, bulls, and young.	58	kg CH4/head/yr	Equation 10.19 in Volume 4 of the 2006 IPCC Guidelines for National Greenhouse Gas Inventories	Sheet 1 of 1, Category Code 3A1, Page A1.7 of Volume 4 of the 2006 IPCC Guidelines		2006 IPCC Guidelines for National Greenhouse Gas Inventories, Volume 4, Table 10.11 - Tier 1 enteric fermentation emission factors for Cattle, on page 10.29	IPCC	58	6.621	Component	AFOLU
415941	4A - Enteric Fermentation	3.A.1 - Enteric Fermentation	METHANE	2006 IPCC default	Tier 1 enteric fermentation emission factors for Cattle	Commercialised dairy sector based on grazing. Separate beef cow herd, primarily grazing rangelands of widely varying quality. Growing amount of feedlot feeding with grains. Dairy cows are a small part of the population.	Animal category: Cattle (Dairy)	Region: Oceania		Average milk production of 2,200 kg head-1 yr-1.	100	kg CH4/head/yr	Equation 10.19 in Volume 4 of the 2006 IPCC Guidelines for National Greenhouse Gas Inventories	Sheet 1 of 1, Category Code 3A1, Page A1.7 of Volume 4 of the 2006 IPCC Guidelines		2006 IPCC Guidelines for National Greenhouse Gas Inventories, Volume 4, Table 10.11 - Tier 1 enteric fermentation emission factors for Cattle, on page 10.29	IPCC	100	11.4155	Component	AFOLU
415942	4A - Enteric Fermentation	3.A.1 - Enteric Fermentation	METHANE	2006 IPCC default	Tier 1 enteric fermentation emission factors for Cattle	Commercialised dairy sector based on grazing. Separate beef cow herd, primarily grazing rangelands of widely varying quality. Growing amount of feedlot feeding with grains. Dairy cows are a small part of the population.	Animal category: Cattle (Other Cattle)	Region: Oceania		Includes beef cows, bulls, and young.	60	kg CH4/head/yr	Equation 10.19 in Volume 4 of the 2006 IPCC Guidelines for National Greenhouse Gas Inventories	Sheet 1 of 1, Category Code 3A1, Page A1.7 of Volume 4 of the 2006 IPCC Guidelines		2006 IPCC Guidelines for National Greenhouse Gas Inventories, Volume 4, Table 10.11 - Tier 1 enteric fermentation emission factors for Cattle, on page 10.29	IPCC	60	6.84932	Component	AFOLU
415943	4A - Enteric Fermentation	3.A.1 - Enteric Fermentation	METHANE	2006 IPCC default	Tier 1 enteric fermentation emission factors for Cattle	Commercialised dairy sector based on grazing. Separate beef cow herd grazing pastures and rangelands. Minor amount of feedlot feeding with grains. Growing non-dairy cattle comprise a large portion of the population.	Animal category: Cattle (Dairy)	Region: Latin America		Average milk production of 800 kg head-1 yr-1	72	kg CH4/head/yr	Equation 10.19 in Volume 4 of the 2006 IPCC Guidelines for National Greenhouse Gas Inventories	Sheet 1 of 1, Category Code 3A1, Page A1.7 of Volume 4 of the 2006 IPCC Guidelines		2006 IPCC Guidelines for National Greenhouse Gas Inventories, Volume 4, Table 10.11 - Tier 1 enteric fermentation emission factors for Cattle, on page 10.29	IPCC	72	8.21918	Component	AFOLU
415944	4A - Enteric Fermentation	3.A.1 - Enteric Fermentation	METHANE	2006 IPCC default	Tier 1 enteric fermentation emission factors for Cattle	Commercialised dairy sector based on grazing. Separate beef cow herd grazing pastures and rangelands. Minor amount of feedlot feeding with grains. Growing non-dairy cattle comprise a large portion of the population.	Animal category: Cattle (Other Cattle)	Region: Latin America		Includes beef cows, bulls, and young.	56	kg CH4/head/yr	Equation 10.19 in Volume 4 of the 2006 IPCC Guidelines for National Greenhouse Gas Inventories	Sheet 1 of 1, Category Code 3A1, Page A1.7 of Volume 4 of the 2006 IPCC Guidelines		2006 IPCC Guidelines for National Greenhouse Gas Inventories, Volume 4, Table 10.11 - Tier 1 enteric fermentation emission factors for Cattle, on page 10.29	IPCC	56	6.39269	Component	AFOLU
415945	4A - Enteric Fermentation	3.A.1 - Enteric Fermentation	METHANE	2006 IPCC default	Tier 1 enteric fermentation emission factors for Cattle	Small commercialised dairy sector. Most cattle are multi-purpose, providing draft power and some milk within farming regions. Small grazing population. Cattle of all types are smaller than those found in most other regions.	Animal category: Cattle (Dairy)	Region: Asia		Average milk production of 1,650 kg head-1 yr-1	68	kg CH4/head/yr	Equation 10.19 in Volume 4 of the 2006 IPCC Guidelines for National Greenhouse Gas Inventories	Sheet 1 of 1, Category Code 3A1, Page A1.7 of Volume 4 of the 2006 IPCC Guidelines		2006 IPCC Guidelines for National Greenhouse Gas Inventories, Volume 4, Table 10.11 - Tier 1 enteric fermentation emission factors for Cattle, on page 10.29	IPCC	68	7.76256	Component	AFOLU
415946	4A - Enteric Fermentation	3.A.1 - Enteric Fermentation	METHANE	2006 IPCC default	Tier 1 enteric fermentation emission factors for Cattle	Small commercialised dairy sector. Most cattle are multi-purpose, providing draft power and some milk within farming regions. Small grazing population. Cattle of all types are smaller than those found in most other regions.	Animal category: Cattle (Other Cattle)	Region: Asia		Includes multi-purpose cows, bulls, and young	47	kg CH4/head/yr	Equation 10.19 in Volume 4 of the 2006 IPCC Guidelines for National Greenhouse Gas Inventories	Sheet 1 of 1, Category Code 3A1, Page A1.7 of Volume 4 of the 2006 IPCC Guidelines		2006 IPCC Guidelines for National Greenhouse Gas Inventories, Volume 4, Table 10.11 - Tier 1 enteric fermentation emission factors for Cattle, on page 10.29	IPCC	47	5.3653	Component	AFOLU
415947	4A - Enteric Fermentation	3.A.1 - Enteric Fermentation	METHANE	2006 IPCC default	Tier 1 enteric fermentation emission factors for Cattle	Commercialised dairy sector based on grazing with low production per cow. Most cattle are multi-purpose, providing draft power and some milk within farming regions. Some cattle graze over very large areas. Cattle are smaller than those found in most other regions.	Animal category: Cattle (Dairy)	Region: Africa and Middle East		Average milk production of 475 kg head-1 yr-1	46	kg CH4/head/yr	Equation 10.19 in Volume 4 of the 2006 IPCC Guidelines for National Greenhouse Gas Inventories	Sheet 1 of 1, Category Code 3A1, Page A1.7 of Volume 4 of the 2006 IPCC Guidelines		2006 IPCC Guidelines for National Greenhouse Gas Inventories, Volume 4, Table 10.11 - Tier 1 enteric fermentation emission factors for Cattle, on page 10.29	IPCC	46	5.25114	Component	AFOLU
415948	4A - Enteric Fermentation	3.A.1 - Enteric Fermentation	METHANE	2006 IPCC default	Tier 1 enteric fermentation emission factors for Cattle	Commercialised dairy sector based on grazing with low production per cow. Most cattle are multi-purpose, providing draft power and some milk within farming regions. Some cattle graze over very large areas. Cattle are smaller than those found in most other regions.	Animal category: Cattle (Other Cattle)	Region: Africa and Middle East		Includes multi-purpose cows, bulls, and young	31	kg CH4/head/yr	Equation 10.19 in Volume 4 of the 2006 IPCC Guidelines for National Greenhouse Gas Inventories	Sheet 1 of 1, Category Code 3A1, Page A1.7 of Volume 4 of the 2006 IPCC Guidelines		2006 IPCC Guidelines for National Greenhouse Gas Inventories, Volume 4, Table 10.11 - Tier 1 enteric fermentation emission factors for Cattle, on page 10.29	IPCC	31	3.53881	Component	AFOLU
415949	4A - Enteric Fermentation	3.A.1 - Enteric Fermentation	METHANE	2006 IPCC default	Tier 1 enteric fermentation emission factors for Cattle	Commercialised dairy sector based on crop by-product feeding with low production per cow. Most bullocks provide draft power and cows provide some milk in farming regions. Small grazing population. Cattle in this region are the smallest compared to cattle found in all other regions.	Animal category: Cattle (Dairy)	Region: Indian Subcontinent		Average milk production of 900 kg head-1 yr-1	58	kg CH4/head/yr	Equation 10.19 in Volume 4 of the 2006 IPCC Guidelines for National Greenhouse Gas Inventories	Sheet 1 of 1, Category Code 3A1, Page A1.7 of Volume 4 of the 2006 IPCC Guidelines		2006 IPCC Guidelines for National Greenhouse Gas Inventories, Volume 4, Table 10.11 - Tier 1 enteric fermentation emission factors for Cattle, on page 10.29	IPCC	58	6.621	Component	AFOLU
415950	4A - Enteric Fermentation	3.A.1 - Enteric Fermentation	METHANE	2006 IPCC default	Tier 1 enteric fermentation emission factors for Cattle	Commercialised dairy sector based on crop by-product feeding with low production per cow. Most bullocks provide draft power and cows provide some milk in farming regions. Small grazing population. Cattle in this region are the smallest compared to cattle found in all other regions.	Animal category: Cattle (Other Cattle)	Region: Indian Subcontinent		Includes cows, bulls, and young. Young comprise a large portion of the population	27	kg CH4/head/yr	Equation 10.19 in Volume 4 of the 2006 IPCC Guidelines for National Greenhouse Gas Inventories	Sheet 1 of 1, Category Code 3A1, Page A1.7 of Volume 4 of the 2006 IPCC Guidelines		2006 IPCC Guidelines for National Greenhouse Gas Inventories, Volume 4, Table 10.11 - Tier 1 enteric fermentation emission factors for Cattle, on page 10.29	IPCC	27	3.08219	Component	AFOLU
415957	4B - Manure Management	3.A.2 - Manure Management	METHANE	2006 IPCC default	Manure management methane emission factors by temperature for Dairy Cows	Liquid-based systems are commonly used for dairy cows and swine manure. Other cattle manure is usually managed as a solid and deposited on pastures or ranges.	Animal category: Dairy Cows				48	kg CH4/head/yr	Equation 10.22 in Volume 4 of the 2006 IPCC Guidelines for National Greenhouse Gas Inventories	Sheet 1 of 1, Category Code 3A2, Page A1.7 of Volume 4 of the 2006 IPCC Guidelines	See Annex 10A.2, Tables 10A-4 to 10A-8, Volume 4 of 2006 Guidelines, for derivation of these emission factors	2006 IPCC Guidelines for National Greenhouse Gas Inventories, Volume 4, Table 10.14 - Manure management methane emission factors by temperature for Cattle, Swine, and Buffalo, on page 10.38	IPCC	48	5.47945	Component	AFOLU
415958	4B - Manure Management	3.A.2 - Manure Management	METHANE	2006 IPCC default	Manure management methane emission factors by temperature for Dairy Cows	Liquid-based systems are commonly used for dairy cows and swine manure. Other cattle manure is usually managed as a solid and deposited on pastures or ranges.	Animal category: Dairy Cows				50	kg CH4/head/yr	Equation 10.22 in Volume 4 of the 2006 IPCC Guidelines for National Greenhouse Gas Inventories	Sheet 1 of 1, Category Code 3A2, Page A1.7 of Volume 4 of the 2006 IPCC Guidelines	See Annex 10A.2, Tables 10A-4 to 10A-8, Volume 4 of 2006 Guidelines, for derivation of these emission factors	2006 IPCC Guidelines for National Greenhouse Gas Inventories, Volume 4, Table 10.14 - Manure management methane emission factors by temperature for Cattle, Swine, and Buffalo, on page 10.38	IPCC	50	5.70776	Component	AFOLU
415959	4B - Manure Management	3.A.2 - Manure Management	METHANE	2006 IPCC default	Manure management methane emission factors by temperature for Dairy Cows	Liquid-based systems are commonly used for dairy cows and swine manure. Other cattle manure is usually managed as a solid and deposited on pastures or ranges.	Animal category: Dairy Cows				53	kg CH4/head/yr	Equation 10.22 in Volume 4 of the 2006 IPCC Guidelines for National Greenhouse Gas Inventories	Sheet 1 of 1, Category Code 3A2, Page A1.7 of Volume 4 of the 2006 IPCC Guidelines	See Annex 10A.2, Tables 10A-4 to 10A-8, Volume 4 of 2006 Guidelines, for derivation of these emission factors	2006 IPCC Guidelines for National Greenhouse Gas Inventories, Volume 4, Table 10.14 - Manure management methane emission factors by temperature for Cattle, Swine, and Buffalo, on page 10.38	IPCC	53	6.05023	Component	AFOLU
415960	4B - Manure Management	3.A.2 - Manure Management	METHANE	2006 IPCC default	Manure management methane emission factors by temperature for Dairy Cows	Liquid-based systems are commonly used for dairy cows and swine manure. Other cattle manure is usually managed as a solid and deposited on pastures or ranges.	Animal category: Dairy Cows				55	kg CH4/head/yr	Equation 10.22 in Volume 4 of the 2006 IPCC Guidelines for National Greenhouse Gas Inventories	Sheet 1 of 1, Category Code 3A2, Page A1.7 of Volume 4 of the 2006 IPCC Guidelines	See Annex 10A.2, Tables 10A-4 to 10A-8, Volume 4 of 2006 Guidelines, for derivation of these emission factors	2006 IPCC Guidelines for National Greenhouse Gas Inventories, Volume 4, Table 10.14 - Manure management methane emission factors by temperature for Cattle, Swine, and Buffalo, on page 10.38	IPCC	55	6.27854	Component	AFOLU
415961	4B - Manure Management	3.A.2 - Manure Management	METHANE	2006 IPCC default	Manure management methane emission factors by temperature for Dairy Cows	Liquid-based systems are commonly used for dairy cows and swine manure. Other cattle manure is usually managed as a solid and deposited on pastures or ranges.	Animal category: Dairy Cows				58	kg CH4/head/yr	Equation 10.22 in Volume 4 of the 2006 IPCC Guidelines for National Greenhouse Gas Inventories	Sheet 1 of 1, Category Code 3A2, Page A1.7 of Volume 4 of the 2006 IPCC Guidelines	See Annex 10A.2, Tables 10A-4 to 10A-8, Volume 4 of 2006 Guidelines, for derivation of these emission factors	2006 IPCC Guidelines for National Greenhouse Gas Inventories, Volume 4, Table 10.14 - Manure management methane emission factors by temperature for Cattle, Swine, and Buffalo, on page 10.38	IPCC	58	6.621	Component	AFOLU
415962	4B - Manure Management	3.A.2 - Manure Management	METHANE	2006 IPCC default	Manure management methane emission factors by temperature for Dairy Cows	Liquid-based systems are commonly used for dairy cows and swine manure. Other cattle manure is usually managed as a solid and deposited on pastures or ranges.	Animal category: Dairy Cows				63	kg CH4/head/yr	Equation 10.22 in Volume 4 of the 2006 IPCC Guidelines for National Greenhouse Gas Inventories	Sheet 1 of 1, Category Code 3A2, Page A1.7 of Volume 4 of the 2006 IPCC Guidelines	See Annex 10A.2, Tables 10A-4 to 10A-8, Volume 4 of 2006 Guidelines, for derivation of these emission factors	2006 IPCC Guidelines for National Greenhouse Gas Inventories, Volume 4, Table 10.14 - Manure management methane emission factors by temperature for Cattle, Swine, and Buffalo, on page 10.38	IPCC	63	7.19178	Component	AFOLU
415963	4B - Manure Management	3.A.2 - Manure Management	METHANE	2006 IPCC default	Manure management methane emission factors by temperature for Dairy Cows	Liquid-based systems are commonly used for dairy cows and swine manure. Other cattle manure is usually managed as a solid and deposited on pastures or ranges.	Animal category: Dairy Cows				65	kg CH4/head/yr	Equation 10.22 in Volume 4 of the 2006 IPCC Guidelines for National Greenhouse Gas Inventories	Sheet 1 of 1, Category Code 3A2, Page A1.7 of Volume 4 of the 2006 IPCC Guidelines	See Annex 10A.2, Tables 10A-4 to 10A-8, Volume 4 of 2006 Guidelines, for derivation of these emission factors	2006 IPCC Guidelines for National Greenhouse Gas Inventories, Volume 4, Table 10.14 - Manure management methane emission factors by temperature for Cattle, Swine, and Buffalo, on page 10.38	IPCC	65	7.42009	Component	AFOLU
415964	4B - Manure Management	3.A.2 - Manure Management	METHANE	2006 IPCC default	Manure management methane emission factors by temperature for Dairy Cows	Liquid-based systems are commonly used for dairy cows and swine manure. Other cattle manure is usually managed as a solid and deposited on pastures or ranges.	Animal category: Dairy Cows				68	kg CH4/head/yr	Equation 10.22 in Volume 4 of the 2006 IPCC Guidelines for National Greenhouse Gas Inventories	Sheet 1 of 1, Category Code 3A2, Page A1.7 of Volume 4 of the 2006 IPCC Guidelines	See Annex 10A.2, Tables 10A-4 to 10A-8, Volume 4 of 2006 Guidelines, for derivation of these emission factors	2006 IPCC Guidelines for National Greenhouse Gas Inventories, Volume 4, Table 10.14 - Manure management methane emission factors by temperature for Cattle, Swine, and Buffalo, on page 10.38	IPCC	68	7.76256	Component	AFOLU
415965	4B - Manure Management	3.A.2 - Manure Management	METHANE	2006 IPCC default	Manure management methane emission factors by temperature for Dairy Cows	Liquid-based systems are commonly used for dairy cows and swine manure. Other cattle manure is usually managed as a solid and deposited on pastures or ranges.	Animal category: Dairy Cows				71	kg CH4/head/yr	Equation 10.22 in Volume 4 of the 2006 IPCC Guidelines for National Greenhouse Gas Inventories	Sheet 1 of 1, Category Code 3A2, Page A1.7 of Volume 4 of the 2006 IPCC Guidelines	See Annex 10A.2, Tables 10A-4 to 10A-8, Volume 4 of 2006 Guidelines, for derivation of these emission factors	2006 IPCC Guidelines for National Greenhouse Gas Inventories, Volume 4, Table 10.14 - Manure management methane emission factors by temperature for Cattle, Swine, and Buffalo, on page 10.38	IPCC	71	8.10502	Component	AFOLU
415966	4B - Manure Management	3.A.2 - Manure Management	METHANE	2006 IPCC default	Manure management methane emission factors by temperature for Dairy Cows	Liquid-based systems are commonly used for dairy cows and swine manure. Other cattle manure is usually managed as a solid and deposited on pastures or ranges.	Animal category: Dairy Cows				74	kg CH4/head/yr	Equation 10.22 in Volume 4 of the 2006 IPCC Guidelines for National Greenhouse Gas Inventories	Sheet 1 of 1, Category Code 3A2, Page A1.7 of Volume 4 of the 2006 IPCC Guidelines	See Annex 10A.2, Tables 10A-4 to 10A-8, Volume 4 of 2006 Guidelines, for derivation of these emission factors	2006 IPCC Guidelines for National Greenhouse Gas Inventories, Volume 4, Table 10.14 - Manure management methane emission factors by temperature for Cattle, Swine, and Buffalo, on page 10.38	IPCC	74	8.44749	Component	AFOLU
415967	4B - Manure Management	3.A.2 - Manure Management	METHANE	2006 IPCC default	Manure management methane emission factors by temperature for Dairy Cows	Liquid-based systems are commonly used for dairy cows and swine manure. Other cattle manure is usually managed as a solid and deposited on pastures or ranges.	Animal category: Dairy Cows				78	kg CH4/head/yr	Equation 10.22 in Volume 4 of the 2006 IPCC Guidelines for National Greenhouse Gas Inventories	Sheet 1 of 1, Category Code 3A2, Page A1.7 of Volume 4 of the 2006 IPCC Guidelines	See Annex 10A.2, Tables 10A-4 to 10A-8, Volume 4 of 2006 Guidelines, for derivation of these emission factors	2006 IPCC Guidelines for National Greenhouse Gas Inventories, Volume 4, Table 10.14 - Manure management methane emission factors by temperature for Cattle, Swine, and Buffalo, on page 10.38	IPCC	78	8.90411	Component	AFOLU
415968	4B - Manure Management	3.A.2 - Manure Management	METHANE	2006 IPCC default	Manure management methane emission factors by temperature for Dairy Cows	Liquid-based systems are commonly used for dairy cows and swine manure. Other cattle manure is usually managed as a solid and deposited on pastures or ranges.	Animal category: Dairy Cows				81	kg CH4/head/yr	Equation 10.22 in Volume 4 of the 2006 IPCC Guidelines for National Greenhouse Gas Inventories	Sheet 1 of 1, Category Code 3A2, Page A1.7 of Volume 4 of the 2006 IPCC Guidelines	See Annex 10A.2, Tables 10A-4 to 10A-8, Volume 4 of 2006 Guidelines, for derivation of these emission factors	2006 IPCC Guidelines for National Greenhouse Gas Inventories, Volume 4, Table 10.14 - Manure management methane emission factors by temperature for Cattle, Swine, and Buffalo, on page 10.38	IPCC	81	9.24658	Component	AFOLU
415969	4B - Manure Management	3.A.2 - Manure Management	METHANE	2006 IPCC default	Manure management methane emission factors by temperature for Dairy Cows	Liquid-based systems are commonly used for dairy cows and swine manure. Other cattle manure is usually managed as a solid and deposited on pastures or ranges.	Animal category: Dairy Cows				85	kg CH4/head/yr	Equation 10.22 in Volume 4 of the 2006 IPCC Guidelines for National Greenhouse Gas Inventories	Sheet 1 of 1, Category Code 3A2, Page A1.7 of Volume 4 of the 2006 IPCC Guidelines	See Annex 10A.2, Tables 10A-4 to 10A-8, Volume 4 of 2006 Guidelines, for derivation of these emission factors	2006 IPCC Guidelines for National Greenhouse Gas Inventories, Volume 4, Table 10.14 - Manure management methane emission factors by temperature for Cattle, Swine, and Buffalo, on page 10.38	IPCC	85	9.7032	Component	AFOLU
415970	4B - Manure Management	3.A.2 - Manure Management	METHANE	2006 IPCC default	Manure management methane emission factors by temperature for Dairy Cows	Liquid-based systems are commonly used for dairy cows and swine manure. Other cattle manure is usually managed as a solid and deposited on pastures or ranges.	Animal category: Dairy Cows				89	kg CH4/head/yr	Equation 10.22 in Volume 4 of the 2006 IPCC Guidelines for National Greenhouse Gas Inventories	Sheet 1 of 1, Category Code 3A2, Page A1.7 of Volume 4 of the 2006 IPCC Guidelines	See Annex 10A.2, Tables 10A-4 to 10A-8, Volume 4 of 2006 Guidelines, for derivation of these emission factors	2006 IPCC Guidelines for National Greenhouse Gas Inventories, Volume 4, Table 10.14 - Manure management methane emission factors by temperature for Cattle, Swine, and Buffalo, on page 10.38	IPCC	89	10.1598	Component	AFOLU
415971	4B - Manure Management	3.A.2 - Manure Management	METHANE	2006 IPCC default	Manure management methane emission factors by temperature for Dairy Cows	Liquid-based systems are commonly used for dairy cows and swine manure. Other cattle manure is usually managed as a solid and deposited on pastures or ranges.	Animal category: Dairy Cows				93	kg CH4/head/yr	Equation 10.22 in Volume 4 of the 2006 IPCC Guidelines for National Greenhouse Gas Inventories	Sheet 1 of 1, Category Code 3A2, Page A1.7 of Volume 4 of the 2006 IPCC Guidelines	See Annex 10A.2, Tables 10A-4 to 10A-8, Volume 4 of 2006 Guidelines, for derivation of these emission factors	2006 IPCC Guidelines for National Greenhouse Gas Inventories, Volume 4, Table 10.14 - Manure management methane emission factors by temperature for Cattle, Swine, and Buffalo, on page 10.38	IPCC	93	10.6164	Component	AFOLU
415972	4B - Manure Management	3.A.2 - Manure Management	METHANE	2006 IPCC default	Manure management methane emission factors by temperature for Dairy Cows	Liquid-based systems are commonly used for dairy cows and swine manure. Other cattle manure is usually managed as a solid and deposited on pastures or ranges.	Animal category: Dairy Cows				98	kg CH4/head/yr	Equation 10.22 in Volume 4 of the 2006 IPCC Guidelines for National Greenhouse Gas Inventories	Sheet 1 of 1, Category Code 3A2, Page A1.7 of Volume 4 of the 2006 IPCC Guidelines	See Annex 10A.2, Tables 10A-4 to 10A-8, Volume 4 of 2006 Guidelines, for derivation of these emission factors	2006 IPCC Guidelines for National Greenhouse Gas Inventories, Volume 4, Table 10.14 - Manure management methane emission factors by temperature for Cattle, Swine, and Buffalo, on page 10.38	IPCC	98	11.1872	Component	AFOLU
415973	4B - Manure Management	3.A.2 - Manure Management	METHANE	2006 IPCC default	Manure management methane emission factors by temperature for Dairy Cows	Liquid-based systems are commonly used for dairy cows and swine manure. Other cattle manure is usually managed as a solid and deposited on pastures or ranges.	Animal category: Dairy Cows				105	kg CH4/head/yr	Equation 10.22 in Volume 4 of the 2006 IPCC Guidelines for National Greenhouse Gas Inventories	Sheet 1 of 1, Category Code 3A2, Page A1.7 of Volume 4 of the 2006 IPCC Guidelines	See Annex 10A.2, Tables 10A-4 to 10A-8, Volume 4 of 2006 Guidelines, for derivation of these emission factors	2006 IPCC Guidelines for National Greenhouse Gas Inventories, Volume 4, Table 10.14 - Manure management methane emission factors by temperature for Cattle, Swine, and Buffalo, on page 10.38	IPCC	105	11.9863	Component	AFOLU
415974	4B - Manure Management	3.A.2 - Manure Management	METHANE	2006 IPCC default	Manure management methane emission factors by temperature for Dairy Cows	Liquid-based systems are commonly used for dairy cows and swine manure. Other cattle manure is usually managed as a solid and deposited on pastures or ranges.	Animal category: Dairy Cows				110	kg CH4/head/yr	Equation 10.22 in Volume 4 of the 2006 IPCC Guidelines for National Greenhouse Gas Inventories	Sheet 1 of 1, Category Code 3A2, Page A1.7 of Volume 4 of the 2006 IPCC Guidelines	See Annex 10A.2, Tables 10A-4 to 10A-8, Volume 4 of 2006 Guidelines, for derivation of these emission factors	2006 IPCC Guidelines for National Greenhouse Gas Inventories, Volume 4, Table 10.14 - Manure management methane emission factors by temperature for Cattle, Swine, and Buffalo, on page 10.38	IPCC	110	12.5571	Component	AFOLU
415975	4B - Manure Management	3.A.2 - Manure Management	METHANE	2006 IPCC default	Manure management methane emission factors by temperature for Dairy Cows	Liquid-based systems are commonly used for dairy cows and swine manure. Other cattle manure is usually managed as a solid and deposited on pastures or ranges.	Animal category: Dairy Cows				112	kg CH4/head/yr	Equation 10.22 in Volume 4 of the 2006 IPCC Guidelines for National Greenhouse Gas Inventories	Sheet 1 of 1, Category Code 3A2, Page A1.7 of Volume 4 of the 2006 IPCC Guidelines	See Annex 10A.2, Tables 10A-4 to 10A-8, Volume 4 of 2006 Guidelines, for derivation of these emission factors	2006 IPCC Guidelines for National Greenhouse Gas Inventories, Volume 4, Table 10.14 - Manure management methane emission factors by temperature for Cattle, Swine, and Buffalo, on page 10.38	IPCC	112	12.7854	Component	AFOLU
415976	4B - Manure Management	3.A.2 - Manure Management	METHANE	2006 IPCC default	Manure management methane emission factors by temperature for Other Cattle	Liquid-based systems are commonly used for dairy cows and swine manure. Other cattle manure is usually managed as a solid and deposited on pastures or ranges.	Animal category: Other Cattle				1	kg CH4/head/yr	Equation 10.22 in Volume 4 of the 2006 IPCC Guidelines for National Greenhouse Gas Inventories	Sheet 1 of 1, Category Code 3A2, Page A1.7 of Volume 4 of the 2006 IPCC Guidelines	See Annex 10A.2, Tables 10A-4 to 10A-8, Volume 4 of 2006 Guidelines, for derivation of these emission factors	2006 IPCC Guidelines for National Greenhouse Gas Inventories, Volume 4, Table 10.14 - Manure management methane emission factors by temperature for Cattle, Swine, and Buffalo, on page 10.38	IPCC	1	0.114155	Component	AFOLU
415977	4B - Manure Management	3.A.2 - Manure Management	METHANE	2006 IPCC default	Manure management methane emission factors by temperature for Other Cattle	Liquid-based systems are commonly used for dairy cows and swine manure. Other cattle manure is usually managed as a solid and deposited on pastures or ranges.	Animal category: Other Cattle				2	kg CH4/head/yr	Equation 10.22 in Volume 4 of the 2006 IPCC Guidelines for National Greenhouse Gas Inventories	Sheet 1 of 1, Category Code 3A2, Page A1.7 of Volume 4 of the 2006 IPCC Guidelines	See Annex 10A.2, Tables 10A-4 to 10A-8, Volume 4 of 2006 Guidelines, for derivation of these emission factors	2006 IPCC Guidelines for National Greenhouse Gas Inventories, Volume 4, Table 10.14 - Manure management methane emission factors by temperature for Cattle, Swine, and Buffalo, on page 10.38	IPCC	2	0.228311	Component	AFOLU
415978	4B - Manure Management	3.A.2 - Manure Management	METHANE	2006 IPCC default	Manure management methane emission factors by temperature for Market Swine	Liquid-based systems are commonly used for dairy cows and swine manure. Other cattle manure is usually managed as a solid and deposited on pastures or ranges.	Animal category: Market Swine				10	kg CH4/head/yr	Equation 10.22 in Volume 4 of the 2006 IPCC Guidelines for National Greenhouse Gas Inventories	Sheet 1 of 1, Category Code 3A2, Page A1.7 of Volume 4 of the 2006 IPCC Guidelines	See Annex 10A.2, Tables 10A-4 to 10A-8, Volume 4 of 2006 Guidelines, for derivation of these emission factors	2006 IPCC Guidelines for National Greenhouse Gas Inventories, Volume 4, Table 10.14 - Manure management methane emission factors by temperature for Cattle, Swine, and Buffalo, on page 10.38	IPCC	10	1.14155	Component	AFOLU
415979	4B - Manure Management	3.A.2 - Manure Management	METHANE	2006 IPCC default	Manure management methane emission factors by temperature for Market Swine	Liquid-based systems are commonly used for dairy cows and swine manure. Other cattle manure is usually managed as a solid and deposited on pastures or ranges.	Animal category: Market Swine				11	kg CH4/head/yr	Equation 10.22 in Volume 4 of the 2006 IPCC Guidelines for National Greenhouse Gas Inventories	Sheet 1 of 1, Category Code 3A2, Page A1.7 of Volume 4 of the 2006 IPCC Guidelines	See Annex 10A.2, Tables 10A-4 to 10A-8, Volume 4 of 2006 Guidelines, for derivation of these emission factors	2006 IPCC Guidelines for National Greenhouse Gas Inventories, Volume 4, Table 10.14 - Manure management methane emission factors by temperature for Cattle, Swine, and Buffalo, on page 10.38	IPCC	11	1.25571	Component	AFOLU
415980	4B - Manure Management	3.A.2 - Manure Management	METHANE	2006 IPCC default	Manure management methane emission factors by temperature for Market Swine	Liquid-based systems are commonly used for dairy cows and swine manure. Other cattle manure is usually managed as a solid and deposited on pastures or ranges.	Animal category: Market Swine				12	kg CH4/head/yr	Equation 10.22 in Volume 4 of the 2006 IPCC Guidelines for National Greenhouse Gas Inventories	Sheet 1 of 1, Category Code 3A2, Page A1.7 of Volume 4 of the 2006 IPCC Guidelines	See Annex 10A.2, Tables 10A-4 to 10A-8, Volume 4 of 2006 Guidelines, for derivation of these emission factors	2006 IPCC Guidelines for National Greenhouse Gas Inventories, Volume 4, Table 10.14 - Manure management methane emission factors by temperature for Cattle, Swine, and Buffalo, on page 10.38	IPCC	12	1.36986	Component	AFOLU
415981	4B - Manure Management	3.A.2 - Manure Management	METHANE	2006 IPCC default	Manure management methane emission factors by temperature for Market Swine	Liquid-based systems are commonly used for dairy cows and swine manure. Other cattle manure is usually managed as a solid and deposited on pastures or ranges.	Animal category: Market Swine				13	kg CH4/head/yr	Equation 10.22 in Volume 4 of the 2006 IPCC Guidelines for National Greenhouse Gas Inventories	Sheet 1 of 1, Category Code 3A2, Page A1.7 of Volume 4 of the 2006 IPCC Guidelines	See Annex 10A.2, Tables 10A-4 to 10A-8, Volume 4 of 2006 Guidelines, for derivation of these emission factors	2006 IPCC Guidelines for National Greenhouse Gas Inventories, Volume 4, Table 10.14 - Manure management methane emission factors by temperature for Cattle, Swine, and Buffalo, on page 10.38	IPCC	13	1.48402	Component	AFOLU
415995	4B - Manure Management	3.A.2 - Manure Management	METHANE	2006 IPCC default	Manure management methane emission factors by temperature for Market Swine	Liquid-based systems are commonly used for dairy cows and swine manure. Other cattle manure is usually managed as a solid and deposited on pastures or ranges.	Animal category: Market Swine				14	kg CH4/head/yr	Equation 10.22 in Volume 4 of the 2006 IPCC Guidelines for National Greenhouse Gas Inventories	Sheet 1 of 1, Category Code 3A2, Page A1.7 of Volume 4 of the 2006 IPCC Guidelines	See Annex 10A.2, Tables 10A-4 to 10A-8, Volume 4 of 2006 Guidelines, for derivation of these emission factors	2006 IPCC Guidelines for National Greenhouse Gas Inventories, Volume 4, Table 10.14 - Manure management methane emission factors by temperature for Cattle, Swine, and Buffalo, on page 10.38	IPCC	14	1.59817	Component	AFOLU
415996	4B - Manure Management	3.A.2 - Manure Management	METHANE	2006 IPCC default	Manure management methane emission factors by temperature for Market Swine	Liquid-based systems are commonly used for dairy cows and swine manure. Other cattle manure is usually managed as a solid and deposited on pastures or ranges.	Animal category: Market Swine				15	kg CH4/head/yr	Equation 10.22 in Volume 4 of the 2006 IPCC Guidelines for National Greenhouse Gas Inventories	Sheet 1 of 1, Category Code 3A2, Page A1.7 of Volume 4 of the 2006 IPCC Guidelines	See Annex 10A.2, Tables 10A-4 to 10A-8, Volume 4 of 2006 Guidelines, for derivation of these emission factors	2006 IPCC Guidelines for National Greenhouse Gas Inventories, Volume 4, Table 10.14 - Manure management methane emission factors by temperature for Cattle, Swine, and Buffalo, on page 10.38	IPCC	15	1.71233	Component	AFOLU
415997	4B - Manure Management	3.A.2 - Manure Management	METHANE	2006 IPCC default	Manure management methane emission factors by temperature for Market Swine	Liquid-based systems are commonly used for dairy cows and swine manure. Other cattle manure is usually managed as a solid and deposited on pastures or ranges.	Animal category: Market Swine				16	kg CH4/head/yr	Equation 10.22 in Volume 4 of the 2006 IPCC Guidelines for National Greenhouse Gas Inventories	Sheet 1 of 1, Category Code 3A2, Page A1.7 of Volume 4 of the 2006 IPCC Guidelines	See Annex 10A.2, Tables 10A-4 to 10A-8, Volume 4 of 2006 Guidelines, for derivation of these emission factors	2006 IPCC Guidelines for National Greenhouse Gas Inventories, Volume 4, Table 10.14 - Manure management methane emission factors by temperature for Cattle, Swine, and Buffalo, on page 10.38	IPCC	16	1.82648	Component	AFOLU
415998	4B - Manure Management	3.A.2 - Manure Management	METHANE	2006 IPCC default	Manure management methane emission factors by temperature for Market Swine	Liquid-based systems are commonly used for dairy cows and swine manure. Other cattle manure is usually managed as a solid and deposited on pastures or ranges.	Animal category: Market Swine				17	kg CH4/head/yr	Equation 10.22 in Volume 4 of the 2006 IPCC Guidelines for National Greenhouse Gas Inventories	Sheet 1 of 1, Category Code 3A2, Page A1.7 of Volume 4 of the 2006 IPCC Guidelines	See Annex 10A.2, Tables 10A-4 to 10A-8, Volume 4 of 2006 Guidelines, for derivation of these emission factors	2006 IPCC Guidelines for National Greenhouse Gas Inventories, Volume 4, Table 10.14 - Manure management methane emission factors by temperature for Cattle, Swine, and Buffalo, on page 10.38	IPCC	17	1.94064	Component	AFOLU
415999	4B - Manure Management	3.A.2 - Manure Management	METHANE	2006 IPCC default	Manure management methane emission factors by temperature for Market Swine	Liquid-based systems are commonly used for dairy cows and swine manure. Other cattle manure is usually managed as a solid and deposited on pastures or ranges.	Animal category: Market Swine				18	kg CH4/head/yr	Equation 10.22 in Volume 4 of the 2006 IPCC Guidelines for National Greenhouse Gas Inventories	Sheet 1 of 1, Category Code 3A2, Page A1.7 of Volume 4 of the 2006 IPCC Guidelines	See Annex 10A.2, Tables 10A-4 to 10A-8, Volume 4 of 2006 Guidelines, for derivation of these emission factors	2006 IPCC Guidelines for National Greenhouse Gas Inventories, Volume 4, Table 10.14 - Manure management methane emission factors by temperature for Cattle, Swine, and Buffalo, on page 10.38	IPCC	18	2.05479	Component	AFOLU
416000	4B - Manure Management	3.A.2 - Manure Management	METHANE	2006 IPCC default	Manure management methane emission factors by temperature for Market Swine	Liquid-based systems are commonly used for dairy cows and swine manure. Other cattle manure is usually managed as a solid and deposited on pastures or ranges.	Animal category: Market Swine				19	kg CH4/head/yr	Equation 10.22 in Volume 4 of the 2006 IPCC Guidelines for National Greenhouse Gas Inventories	Sheet 1 of 1, Category Code 3A2, Page A1.7 of Volume 4 of the 2006 IPCC Guidelines	See Annex 10A.2, Tables 10A-4 to 10A-8, Volume 4 of 2006 Guidelines, for derivation of these emission factors	2006 IPCC Guidelines for National Greenhouse Gas Inventories, Volume 4, Table 10.14 - Manure management methane emission factors by temperature for Cattle, Swine, and Buffalo, on page 10.38	IPCC	19	2.16895	Component	AFOLU
416001	4B - Manure Management	3.A.2 - Manure Management	METHANE	2006 IPCC default	Manure management methane emission factors by temperature for Market Swine	Liquid-based systems are commonly used for dairy cows and swine manure. Other cattle manure is usually managed as a solid and deposited on pastures or ranges.	Animal category: Market Swine				20	kg CH4/head/yr	Equation 10.22 in Volume 4 of the 2006 IPCC Guidelines for National Greenhouse Gas Inventories	Sheet 1 of 1, Category Code 3A2, Page A1.7 of Volume 4 of the 2006 IPCC Guidelines	See Annex 10A.2, Tables 10A-4 to 10A-8, Volume 4 of 2006 Guidelines, for derivation of these emission factors	2006 IPCC Guidelines for National Greenhouse Gas Inventories, Volume 4, Table 10.14 - Manure management methane emission factors by temperature for Cattle, Swine, and Buffalo, on page 10.38	IPCC	20	2.28311	Component	AFOLU
416002	4B - Manure Management	3.A.2 - Manure Management	METHANE	2006 IPCC default	Manure management methane emission factors by temperature for Market Swine	Liquid-based systems are commonly used for dairy cows and swine manure. Other cattle manure is usually managed as a solid and deposited on pastures or ranges.	Animal category: Market Swine				22	kg CH4/head/yr	Equation 10.22 in Volume 4 of the 2006 IPCC Guidelines for National Greenhouse Gas Inventories	Sheet 1 of 1, Category Code 3A2, Page A1.7 of Volume 4 of the 2006 IPCC Guidelines	See Annex 10A.2, Tables 10A-4 to 10A-8, Volume 4 of 2006 Guidelines, for derivation of these emission factors	2006 IPCC Guidelines for National Greenhouse Gas Inventories, Volume 4, Table 10.14 - Manure management methane emission factors by temperature for Cattle, Swine, and Buffalo, on page 10.38	IPCC	21	2.39726	Component	AFOLU
416003	4B - Manure Management	3.A.2 - Manure Management	METHANE	2006 IPCC default	Manure management methane emission factors by temperature for Market Swine	Liquid-based systems are commonly used for dairy cows and swine manure. Other cattle manure is usually managed as a solid and deposited on pastures or ranges.	Animal category: Market Swine				23	kg CH4/head/yr	Equation 10.22 in Volume 4 of the 2006 IPCC Guidelines for National Greenhouse Gas Inventories	Sheet 1 of 1, Category Code 3A2, Page A1.7 of Volume 4 of the 2006 IPCC Guidelines	See Annex 10A.2, Tables 10A-4 to 10A-8, Volume 4 of 2006 Guidelines, for derivation of these emission factors	2006 IPCC Guidelines for National Greenhouse Gas Inventories, Volume 4, Table 10.14 - Manure management methane emission factors by temperature for Cattle, Swine, and Buffalo, on page 10.38	IPCC	22	2.51142	Component	AFOLU
416004	4B - Manure Management	3.A.2 - Manure Management	METHANE	2006 IPCC default	Manure management methane emission factors by temperature for Breeding Swine	Liquid-based systems are commonly used for dairy cows and swine manure. Other cattle manure is usually managed as a solid and deposited on pastures or ranges.	Animal category: Breeding Swine				19	kg CH4/head/yr	Equation 10.22 in Volume 4 of the 2006 IPCC Guidelines for National Greenhouse Gas Inventories	Sheet 1 of 1, Category Code 3A2, Page A1.7 of Volume 4 of the 2006 IPCC Guidelines	See Annex 10A.2, Tables 10A-4 to 10A-8, Volume 4 of 2006 Guidelines, for derivation of these emission factors	2006 IPCC Guidelines for National Greenhouse Gas Inventories, Volume 4, Table 10.14 - Manure management methane emission factors by temperature for Cattle, Swine, and Buffalo, on page 10.38	IPCC	23	2.62557	Component	AFOLU
416005	4B - Manure Management	3.A.2 - Manure Management	METHANE	2006 IPCC default	Manure management methane emission factors by temperature for Breeding Swine	Liquid-based systems are commonly used for dairy cows and swine manure. Other cattle manure is usually managed as a solid and deposited on pastures or ranges.	Animal category: Breeding Swine				20	kg CH4/head/yr	Equation 10.22 in Volume 4 of the 2006 IPCC Guidelines for National Greenhouse Gas Inventories	Sheet 1 of 1, Category Code 3A2, Page A1.7 of Volume 4 of the 2006 IPCC Guidelines	See Annex 10A.2, Tables 10A-4 to 10A-8, Volume 4 of 2006 Guidelines, for derivation of these emission factors	2006 IPCC Guidelines for National Greenhouse Gas Inventories, Volume 4, Table 10.14 - Manure management methane emission factors by temperature for Cattle, Swine, and Buffalo, on page 10.38	IPCC	24	2.73973	Component	AFOLU
416006	4B - Manure Management	3.A.2 - Manure Management	METHANE	2006 IPCC default	Manure management methane emission factors by temperature for Breeding Swine	Liquid-based systems are commonly used for dairy cows and swine manure. Other cattle manure is usually managed as a solid and deposited on pastures or ranges.	Animal category: Breeding Swine				21	kg CH4/head/yr	Equation 10.22 in Volume 4 of the 2006 IPCC Guidelines for National Greenhouse Gas Inventories	Sheet 1 of 1, Category Code 3A2, Page A1.7 of Volume 4 of the 2006 IPCC Guidelines	See Annex 10A.2, Tables 10A-4 to 10A-8, Volume 4 of 2006 Guidelines, for derivation of these emission factors	2006 IPCC Guidelines for National Greenhouse Gas Inventories, Volume 4, Table 10.14 - Manure management methane emission factors by temperature for Cattle, Swine, and Buffalo, on page 10.38	IPCC	25	2.85388	Component	AFOLU
416007	4B - Manure Management	3.A.2 - Manure Management	METHANE	2006 IPCC default	Manure management methane emission factors by temperature for Breeding Swine	Liquid-based systems are commonly used for dairy cows and swine manure. Other cattle manure is usually managed as a solid and deposited on pastures or ranges.	Animal category: Breeding Swine				22	kg CH4/head/yr	Equation 10.22 in Volume 4 of the 2006 IPCC Guidelines for National Greenhouse Gas Inventories	Sheet 1 of 1, Category Code 3A2, Page A1.7 of Volume 4 of the 2006 IPCC Guidelines	See Annex 10A.2, Tables 10A-4 to 10A-8, Volume 4 of 2006 Guidelines, for derivation of these emission factors	2006 IPCC Guidelines for National Greenhouse Gas Inventories, Volume 4, Table 10.14 - Manure management methane emission factors by temperature for Cattle, Swine, and Buffalo, on page 10.38	IPCC	26	2.96804	Component	AFOLU
416008	4B - Manure Management	3.A.2 - Manure Management	METHANE	2006 IPCC default	Manure management methane emission factors by temperature for Breeding Swine	Liquid-based systems are commonly used for dairy cows and swine manure. Other cattle manure is usually managed as a solid and deposited on pastures or ranges.	Animal category: Breeding Swine				23	kg CH4/head/yr	Equation 10.22 in Volume 4 of the 2006 IPCC Guidelines for National Greenhouse Gas Inventories	Sheet 1 of 1, Category Code 3A2, Page A1.7 of Volume 4 of the 2006 IPCC Guidelines	See Annex 10A.2, Tables 10A-4 to 10A-8, Volume 4 of 2006 Guidelines, for derivation of these emission factors	2006 IPCC Guidelines for National Greenhouse Gas Inventories, Volume 4, Table 10.14 - Manure management methane emission factors by temperature for Cattle, Swine, and Buffalo, on page 10.38	IPCC	27	3.08219	Component	AFOLU
416009	4B - Manure Management	3.A.2 - Manure Management	METHANE	2006 IPCC default	Manure management methane emission factors by temperature for Breeding Swine	Liquid-based systems are commonly used for dairy cows and swine manure. Other cattle manure is usually managed as a solid and deposited on pastures or ranges.	Animal category: Breeding Swine				24	kg CH4/head/yr	Equation 10.22 in Volume 4 of the 2006 IPCC Guidelines for National Greenhouse Gas Inventories	Sheet 1 of 1, Category Code 3A2, Page A1.7 of Volume 4 of the 2006 IPCC Guidelines	See Annex 10A.2, Tables 10A-4 to 10A-8, Volume 4 of 2006 Guidelines, for derivation of these emission factors	2006 IPCC Guidelines for National Greenhouse Gas Inventories, Volume 4, Table 10.14 - Manure management methane emission factors by temperature for Cattle, Swine, and Buffalo, on page 10.38	IPCC	28	3.19635	Component	AFOLU
416010	4B - Manure Management	3.A.2 - Manure Management	METHANE	2006 IPCC default	Manure management methane emission factors by temperature for Breeding Swine	Liquid-based systems are commonly used for dairy cows and swine manure. Other cattle manure is usually managed as a solid and deposited on pastures or ranges.	Animal category: Breeding Swine				26	kg CH4/head/yr	Equation 10.22 in Volume 4 of the 2006 IPCC Guidelines for National Greenhouse Gas Inventories	Sheet 1 of 1, Category Code 3A2, Page A1.7 of Volume 4 of the 2006 IPCC Guidelines	See Annex 10A.2, Tables 10A-4 to 10A-8, Volume 4 of 2006 Guidelines, for derivation of these emission factors	2006 IPCC Guidelines for National Greenhouse Gas Inventories, Volume 4, Table 10.14 - Manure management methane emission factors by temperature for Cattle, Swine, and Buffalo, on page 10.38	IPCC	29	3.3105	Component	AFOLU
416011	4B - Manure Management	3.A.2 - Manure Management	METHANE	2006 IPCC default	Manure management methane emission factors by temperature for Breeding Swine	Liquid-based systems are commonly used for dairy cows and swine manure. Other cattle manure is usually managed as a solid and deposited on pastures or ranges.	Animal category: Breeding Swine				27	kg CH4/head/yr	Equation 10.22 in Volume 4 of the 2006 IPCC Guidelines for National Greenhouse Gas Inventories	Sheet 1 of 1, Category Code 3A2, Page A1.7 of Volume 4 of the 2006 IPCC Guidelines	See Annex 10A.2, Tables 10A-4 to 10A-8, Volume 4 of 2006 Guidelines, for derivation of these emission factors	2006 IPCC Guidelines for National Greenhouse Gas Inventories, Volume 4, Table 10.14 - Manure management methane emission factors by temperature for Cattle, Swine, and Buffalo, on page 10.38	IPCC	30	3.42466	Component	AFOLU
416012	4B - Manure Management	3.A.2 - Manure Management	METHANE	2006 IPCC default	Manure management methane emission factors by temperature for Breeding Swine	Liquid-based systems are commonly used for dairy cows and swine manure. Other cattle manure is usually managed as a solid and deposited on pastures or ranges.	Animal category: Breeding Swine				28	kg CH4/head/yr	Equation 10.22 in Volume 4 of the 2006 IPCC Guidelines for National Greenhouse Gas Inventories	Sheet 1 of 1, Category Code 3A2, Page A1.7 of Volume 4 of the 2006 IPCC Guidelines	See Annex 10A.2, Tables 10A-4 to 10A-8, Volume 4 of 2006 Guidelines, for derivation of these emission factors	2006 IPCC Guidelines for National Greenhouse Gas Inventories, Volume 4, Table 10.14 - Manure management methane emission factors by temperature for Cattle, Swine, and Buffalo, on page 10.38	IPCC	31	3.53881	Component	AFOLU
416013	4B - Manure Management	3.A.2 - Manure Management	METHANE	2006 IPCC default	Manure management methane emission factors by temperature for Breeding Swine	Liquid-based systems are commonly used for dairy cows and swine manure. Other cattle manure is usually managed as a solid and deposited on pastures or ranges.	Animal category: Breeding Swine				29	kg CH4/head/yr	Equation 10.22 in Volume 4 of the 2006 IPCC Guidelines for National Greenhouse Gas Inventories	Sheet 1 of 1, Category Code 3A2, Page A1.7 of Volume 4 of the 2006 IPCC Guidelines	See Annex 10A.2, Tables 10A-4 to 10A-8, Volume 4 of 2006 Guidelines, for derivation of these emission factors	2006 IPCC Guidelines for National Greenhouse Gas Inventories, Volume 4, Table 10.14 - Manure management methane emission factors by temperature for Cattle, Swine, and Buffalo, on page 10.38	IPCC	32	3.65297	Component	AFOLU
416014	4B - Manure Management	3.A.2 - Manure Management	METHANE	2006 IPCC default	Manure management methane emission factors by temperature for Breeding Swine	Liquid-based systems are commonly used for dairy cows and swine manure. Other cattle manure is usually managed as a solid and deposited on pastures or ranges.	Animal category: Breeding Swine				31	kg CH4/head/yr	Equation 10.22 in Volume 4 of the 2006 IPCC Guidelines for National Greenhouse Gas Inventories	Sheet 1 of 1, Category Code 3A2, Page A1.7 of Volume 4 of the 2006 IPCC Guidelines	See Annex 10A.2, Tables 10A-4 to 10A-8, Volume 4 of 2006 Guidelines, for derivation of these emission factors	2006 IPCC Guidelines for National Greenhouse Gas Inventories, Volume 4, Table 10.14 - Manure management methane emission factors by temperature for Cattle, Swine, and Buffalo, on page 10.38	IPCC	33	3.76712	Component	AFOLU
416015	4B - Manure Management	3.A.2 - Manure Management	METHANE	2006 IPCC default	Manure management methane emission factors by temperature for Breeding Swine	Liquid-based systems are commonly used for dairy cows and swine manure. Other cattle manure is usually managed as a solid and deposited on pastures or ranges.	Animal category: Breeding Swine				32	kg CH4/head/yr	Equation 10.22 in Volume 4 of the 2006 IPCC Guidelines for National Greenhouse Gas Inventories	Sheet 1 of 1, Category Code 3A2, Page A1.7 of Volume 4 of the 2006 IPCC Guidelines	See Annex 10A.2, Tables 10A-4 to 10A-8, Volume 4 of 2006 Guidelines, for derivation of these emission factors	2006 IPCC Guidelines for National Greenhouse Gas Inventories, Volume 4, Table 10.14 - Manure management methane emission factors by temperature for Cattle, Swine, and Buffalo, on page 10.38	IPCC	34	3.88128	Component	AFOLU
416016	4B - Manure Management	3.A.2 - Manure Management	METHANE	2006 IPCC default	Manure management methane emission factors by temperature for Breeding Swine	Liquid-based systems are commonly used for dairy cows and swine manure. Other cattle manure is usually managed as a solid and deposited on pastures or ranges.	Animal category: Breeding Swine				34	kg CH4/head/yr	Equation 10.22 in Volume 4 of the 2006 IPCC Guidelines for National Greenhouse Gas Inventories	Sheet 1 of 1, Category Code 3A2, Page A1.7 of Volume 4 of the 2006 IPCC Guidelines	See Annex 10A.2, Tables 10A-4 to 10A-8, Volume 4 of 2006 Guidelines, for derivation of these emission factors	2006 IPCC Guidelines for National Greenhouse Gas Inventories, Volume 4, Table 10.14 - Manure management methane emission factors by temperature for Cattle, Swine, and Buffalo, on page 10.38	IPCC	35	3.99543	Component	AFOLU
416017	4B - Manure Management	3.A.2 - Manure Management	METHANE	2006 IPCC default	Manure management methane emission factors by temperature for Breeding Swine	Liquid-based systems are commonly used for dairy cows and swine manure. Other cattle manure is usually managed as a solid and deposited on pastures or ranges.	Animal category: Breeding Swine				35	kg CH4/head/yr	Equation 10.22 in Volume 4 of the 2006 IPCC Guidelines for National Greenhouse Gas Inventories	Sheet 1 of 1, Category Code 3A2, Page A1.7 of Volume 4 of the 2006 IPCC Guidelines	See Annex 10A.2, Tables 10A-4 to 10A-8, Volume 4 of 2006 Guidelines, for derivation of these emission factors	2006 IPCC Guidelines for National Greenhouse Gas Inventories, Volume 4, Table 10.14 - Manure management methane emission factors by temperature for Cattle, Swine, and Buffalo, on page 10.38	IPCC	36	4.10959	Component	AFOLU
416018	4B - Manure Management	3.A.2 - Manure Management	METHANE	2006 IPCC default	Manure management methane emission factors by temperature for Breeding Swine	Liquid-based systems are commonly used for dairy cows and swine manure. Other cattle manure is usually managed as a solid and deposited on pastures or ranges.	Animal category: Breeding Swine				37	kg CH4/head/yr	Equation 10.22 in Volume 4 of the 2006 IPCC Guidelines for National Greenhouse Gas Inventories	Sheet 1 of 1, Category Code 3A2, Page A1.7 of Volume 4 of the 2006 IPCC Guidelines	See Annex 10A.2, Tables 10A-4 to 10A-8, Volume 4 of 2006 Guidelines, for derivation of these emission factors	2006 IPCC Guidelines for National Greenhouse Gas Inventories, Volume 4, Table 10.14 - Manure management methane emission factors by temperature for Cattle, Swine, and Buffalo, on page 10.38	IPCC	37	4.22374	Component	AFOLU
416019	4B - Manure Management	3.A.2 - Manure Management	METHANE	2006 IPCC default	Manure management methane emission factors by temperature for Breeding Swine	Liquid-based systems are commonly used for dairy cows and swine manure. Other cattle manure is usually managed as a solid and deposited on pastures or ranges.	Animal category: Breeding Swine				39	kg CH4/head/yr	Equation 10.22 in Volume 4 of the 2006 IPCC Guidelines for National Greenhouse Gas Inventories	Sheet 1 of 1, Category Code 3A2, Page A1.7 of Volume 4 of the 2006 IPCC Guidelines	See Annex 10A.2, Tables 10A-4 to 10A-8, Volume 4 of 2006 Guidelines, for derivation of these emission factors	2006 IPCC Guidelines for National Greenhouse Gas Inventories, Volume 4, Table 10.14 - Manure management methane emission factors by temperature for Cattle, Swine, and Buffalo, on page 10.38	IPCC	39	4.45205	Component	AFOLU
416020	4B - Manure Management	3.A.2 - Manure Management	METHANE	2006 IPCC default	Manure management methane emission factors by temperature for Breeding Swine	Liquid-based systems are commonly used for dairy cows and swine manure. Other cattle manure is usually managed as a solid and deposited on pastures or ranges.	Animal category: Breeding Swine				41	kg CH4/head/yr	Equation 10.22 in Volume 4 of the 2006 IPCC Guidelines for National Greenhouse Gas Inventories	Sheet 1 of 1, Category Code 3A2, Page A1.7 of Volume 4 of the 2006 IPCC Guidelines	See Annex 10A.2, Tables 10A-4 to 10A-8, Volume 4 of 2006 Guidelines, for derivation of these emission factors	2006 IPCC Guidelines for National Greenhouse Gas Inventories, Volume 4, Table 10.14 - Manure management methane emission factors by temperature for Cattle, Swine, and Buffalo, on page 10.38	IPCC	41	4.68037	Component	AFOLU
416021	4B - Manure Management	3.A.2 - Manure Management	METHANE	2006 IPCC default	Manure management methane emission factors by temperature for Breeding Swine	Liquid-based systems are commonly used for dairy cows and swine manure. Other cattle manure is usually managed as a solid and deposited on pastures or ranges.	Animal category: Breeding Swine				44	kg CH4/head/yr	Equation 10.22 in Volume 4 of the 2006 IPCC Guidelines for National Greenhouse Gas Inventories	Sheet 1 of 1, Category Code 3A2, Page A1.7 of Volume 4 of the 2006 IPCC Guidelines	See Annex 10A.2, Tables 10A-4 to 10A-8, Volume 4 of 2006 Guidelines, for derivation of these emission factors	2006 IPCC Guidelines for National Greenhouse Gas Inventories, Volume 4, Table 10.14 - Manure management methane emission factors by temperature for Cattle, Swine, and Buffalo, on page 10.38	IPCC	44	5.02283	Component	AFOLU
416022	4B - Manure Management	3.A.2 - Manure Management	METHANE	2006 IPCC default	Manure management methane emission factors by temperature for Breeding Swine	Liquid-based systems are commonly used for dairy cows and swine manure. Other cattle manure is usually managed as a solid and deposited on pastures or ranges.	Animal category: Breeding Swine				45	kg CH4/head/yr	Equation 10.22 in Volume 4 of the 2006 IPCC Guidelines for National Greenhouse Gas Inventories	Sheet 1 of 1, Category Code 3A2, Page A1.7 of Volume 4 of the 2006 IPCC Guidelines	See Annex 10A.2, Tables 10A-4 to 10A-8, Volume 4 of 2006 Guidelines, for derivation of these emission factors	2006 IPCC Guidelines for National Greenhouse Gas Inventories, Volume 4, Table 10.14 - Manure management methane emission factors by temperature for Cattle, Swine, and Buffalo, on page 10.38	IPCC	45	5.13699	Component	AFOLU
416023	4B - Manure Management	3.A.2 - Manure Management	METHANE	2006 IPCC default	Manure management methane emission factors by temperature for Dairy Cows	Liquid/slurry and pit storage systems are commonly used for cattle and swine manure. Limited cropland is available for spreading manure.	Animal category: Dairy Cows				21	kg CH4/head/yr	Equation 10.22 in Volume 4 of the 2006 IPCC Guidelines for National Greenhouse Gas Inventories	Sheet 1 of 1, Category Code 3A2, Page A1.7 of Volume 4 of the 2006 IPCC Guidelines	See Annex 10A.2, Tables 10A-4 to 10A-8, Volume 4 of 2006 Guidelines, for derivation of these emission factors	2006 IPCC Guidelines for National Greenhouse Gas Inventories, Volume 4, Table 10.14 - Manure management methane emission factors by temperature for Cattle, Swine, and Buffalo, on page 10.38	IPCC	21	2.39726	Component	AFOLU
416024	4B - Manure Management	3.A.2 - Manure Management	METHANE	2006 IPCC default	Manure management methane emission factors by temperature for Dairy Cows	Liquid/slurry and pit storage systems are commonly used for cattle and swine manure. Limited cropland is available for spreading manure.	Animal category: Dairy Cows				23	kg CH4/head/yr	Equation 10.22 in Volume 4 of the 2006 IPCC Guidelines for National Greenhouse Gas Inventories	Sheet 1 of 1, Category Code 3A2, Page A1.7 of Volume 4 of the 2006 IPCC Guidelines	See Annex 10A.2, Tables 10A-4 to 10A-8, Volume 4 of 2006 Guidelines, for derivation of these emission factors	2006 IPCC Guidelines for National Greenhouse Gas Inventories, Volume 4, Table 10.14 - Manure management methane emission factors by temperature for Cattle, Swine, and Buffalo, on page 10.38	IPCC	23	2.62557	Component	AFOLU
416025	4B - Manure Management	3.A.2 - Manure Management	METHANE	2006 IPCC default	Manure management methane emission factors by temperature for Dairy Cows	Liquid/slurry and pit storage systems are commonly used for cattle and swine manure. Limited cropland is available for spreading manure.	Animal category: Dairy Cows				25	kg CH4/head/yr	Equation 10.22 in Volume 4 of the 2006 IPCC Guidelines for National Greenhouse Gas Inventories	Sheet 1 of 1, Category Code 3A2, Page A1.7 of Volume 4 of the 2006 IPCC Guidelines	See Annex 10A.2, Tables 10A-4 to 10A-8, Volume 4 of 2006 Guidelines, for derivation of these emission factors	2006 IPCC Guidelines for National Greenhouse Gas Inventories, Volume 4, Table 10.14 - Manure management methane emission factors by temperature for Cattle, Swine, and Buffalo, on page 10.38	IPCC	25	2.85388	Component	AFOLU
416026	4B - Manure Management	3.A.2 - Manure Management	METHANE	2006 IPCC default	Manure management methane emission factors by temperature for Dairy Cows	Liquid/slurry and pit storage systems are commonly used for cattle and swine manure. Limited cropland is available for spreading manure.	Animal category: Dairy Cows				27	kg CH4/head/yr	Equation 10.22 in Volume 4 of the 2006 IPCC Guidelines for National Greenhouse Gas Inventories	Sheet 1 of 1, Category Code 3A2, Page A1.7 of Volume 4 of the 2006 IPCC Guidelines	See Annex 10A.2, Tables 10A-4 to 10A-8, Volume 4 of 2006 Guidelines, for derivation of these emission factors	2006 IPCC Guidelines for National Greenhouse Gas Inventories, Volume 4, Table 10.14 - Manure management methane emission factors by temperature for Cattle, Swine, and Buffalo, on page 10.38	IPCC	27	3.08219	Component	AFOLU
416027	4B - Manure Management	3.A.2 - Manure Management	METHANE	2006 IPCC default	Manure management methane emission factors by temperature for Dairy Cows	Liquid/slurry and pit storage systems are commonly used for cattle and swine manure. Limited cropland is available for spreading manure.	Animal category: Dairy Cows				29	kg CH4/head/yr	Equation 10.22 in Volume 4 of the 2006 IPCC Guidelines for National Greenhouse Gas Inventories	Sheet 1 of 1, Category Code 3A2, Page A1.7 of Volume 4 of the 2006 IPCC Guidelines	See Annex 10A.2, Tables 10A-4 to 10A-8, Volume 4 of 2006 Guidelines, for derivation of these emission factors	2006 IPCC Guidelines for National Greenhouse Gas Inventories, Volume 4, Table 10.14 - Manure management methane emission factors by temperature for Cattle, Swine, and Buffalo, on page 10.38	IPCC	29	3.3105	Component	AFOLU
416028	4B - Manure Management	3.A.2 - Manure Management	METHANE	2006 IPCC default	Manure management methane emission factors by temperature for Dairy Cows	Liquid/slurry and pit storage systems are commonly used for cattle and swine manure. Limited cropland is available for spreading manure.	Animal category: Dairy Cows				34	kg CH4/head/yr	Equation 10.22 in Volume 4 of the 2006 IPCC Guidelines for National Greenhouse Gas Inventories	Sheet 1 of 1, Category Code 3A2, Page A1.7 of Volume 4 of the 2006 IPCC Guidelines	See Annex 10A.2, Tables 10A-4 to 10A-8, Volume 4 of 2006 Guidelines, for derivation of these emission factors	2006 IPCC Guidelines for National Greenhouse Gas Inventories, Volume 4, Table 10.14 - Manure management methane emission factors by temperature for Cattle, Swine, and Buffalo, on page 10.38	IPCC	34	3.88128	Component	AFOLU
416029	4B - Manure Management	3.A.2 - Manure Management	METHANE	2006 IPCC default	Manure management methane emission factors by temperature for Dairy Cows	Liquid/slurry and pit storage systems are commonly used for cattle and swine manure. Limited cropland is available for spreading manure.	Animal category: Dairy Cows				37	kg CH4/head/yr	Equation 10.22 in Volume 4 of the 2006 IPCC Guidelines for National Greenhouse Gas Inventories	Sheet 1 of 1, Category Code 3A2, Page A1.7 of Volume 4 of the 2006 IPCC Guidelines	See Annex 10A.2, Tables 10A-4 to 10A-8, Volume 4 of 2006 Guidelines, for derivation of these emission factors	2006 IPCC Guidelines for National Greenhouse Gas Inventories, Volume 4, Table 10.14 - Manure management methane emission factors by temperature for Cattle, Swine, and Buffalo, on page 10.38	IPCC	37	4.22374	Component	AFOLU
416030	4B - Manure Management	3.A.2 - Manure Management	METHANE	2006 IPCC default	Manure management methane emission factors by temperature for Dairy Cows	Liquid/slurry and pit storage systems are commonly used for cattle and swine manure. Limited cropland is available for spreading manure.	Animal category: Dairy Cows				40	kg CH4/head/yr	Equation 10.22 in Volume 4 of the 2006 IPCC Guidelines for National Greenhouse Gas Inventories	Sheet 1 of 1, Category Code 3A2, Page A1.7 of Volume 4 of the 2006 IPCC Guidelines	See Annex 10A.2, Tables 10A-4 to 10A-8, Volume 4 of 2006 Guidelines, for derivation of these emission factors	2006 IPCC Guidelines for National Greenhouse Gas Inventories, Volume 4, Table 10.14 - Manure management methane emission factors by temperature for Cattle, Swine, and Buffalo, on page 10.38	IPCC	40	4.56621	Component	AFOLU
416031	4B - Manure Management	3.A.2 - Manure Management	METHANE	2006 IPCC default	Manure management methane emission factors by temperature for Dairy Cows	Liquid/slurry and pit storage systems are commonly used for cattle and swine manure. Limited cropland is available for spreading manure.	Animal category: Dairy Cows				43	kg CH4/head/yr	Equation 10.22 in Volume 4 of the 2006 IPCC Guidelines for National Greenhouse Gas Inventories	Sheet 1 of 1, Category Code 3A2, Page A1.7 of Volume 4 of the 2006 IPCC Guidelines	See Annex 10A.2, Tables 10A-4 to 10A-8, Volume 4 of 2006 Guidelines, for derivation of these emission factors	2006 IPCC Guidelines for National Greenhouse Gas Inventories, Volume 4, Table 10.14 - Manure management methane emission factors by temperature for Cattle, Swine, and Buffalo, on page 10.38	IPCC	43	4.90868	Component	AFOLU
416032	4B - Manure Management	3.A.2 - Manure Management	METHANE	2006 IPCC default	Manure management methane emission factors by temperature for Dairy Cows	Liquid/slurry and pit storage systems are commonly used for cattle and swine manure. Limited cropland is available for spreading manure.	Animal category: Dairy Cows				47	kg CH4/head/yr	Equation 10.22 in Volume 4 of the 2006 IPCC Guidelines for National Greenhouse Gas Inventories	Sheet 1 of 1, Category Code 3A2, Page A1.7 of Volume 4 of the 2006 IPCC Guidelines	See Annex 10A.2, Tables 10A-4 to 10A-8, Volume 4 of 2006 Guidelines, for derivation of these emission factors	2006 IPCC Guidelines for National Greenhouse Gas Inventories, Volume 4, Table 10.14 - Manure management methane emission factors by temperature for Cattle, Swine, and Buffalo, on page 10.38	IPCC	47	5.3653	Component	AFOLU
416033	4B - Manure Management	3.A.2 - Manure Management	METHANE	2006 IPCC default	Manure management methane emission factors by temperature for Dairy Cows	Liquid/slurry and pit storage systems are commonly used for cattle and swine manure. Limited cropland is available for spreading manure.	Animal category: Dairy Cows				51	kg CH4/head/yr	Equation 10.22 in Volume 4 of the 2006 IPCC Guidelines for National Greenhouse Gas Inventories	Sheet 1 of 1, Category Code 3A2, Page A1.7 of Volume 4 of the 2006 IPCC Guidelines	See Annex 10A.2, Tables 10A-4 to 10A-8, Volume 4 of 2006 Guidelines, for derivation of these emission factors	2006 IPCC Guidelines for National Greenhouse Gas Inventories, Volume 4, Table 10.14 - Manure management methane emission factors by temperature for Cattle, Swine, and Buffalo, on page 10.38	IPCC	51	5.82192	Component	AFOLU
416034	4B - Manure Management	3.A.2 - Manure Management	METHANE	2006 IPCC default	Manure management methane emission factors by temperature for Dairy Cows	Liquid/slurry and pit storage systems are commonly used for cattle and swine manure. Limited cropland is available for spreading manure.	Animal category: Dairy Cows				55	kg CH4/head/yr	Equation 10.22 in Volume 4 of the 2006 IPCC Guidelines for National Greenhouse Gas Inventories	Sheet 1 of 1, Category Code 3A2, Page A1.7 of Volume 4 of the 2006 IPCC Guidelines	See Annex 10A.2, Tables 10A-4 to 10A-8, Volume 4 of 2006 Guidelines, for derivation of these emission factors	2006 IPCC Guidelines for National Greenhouse Gas Inventories, Volume 4, Table 10.14 - Manure management methane emission factors by temperature for Cattle, Swine, and Buffalo, on page 10.38	IPCC	55	6.27854	Component	AFOLU
416035	4B - Manure Management	3.A.2 - Manure Management	METHANE	2006 IPCC default	Manure management methane emission factors by temperature for Dairy Cows	Liquid/slurry and pit storage systems are commonly used for cattle and swine manure. Limited cropland is available for spreading manure.	Animal category: Dairy Cows				59	kg CH4/head/yr	Equation 10.22 in Volume 4 of the 2006 IPCC Guidelines for National Greenhouse Gas Inventories	Sheet 1 of 1, Category Code 3A2, Page A1.7 of Volume 4 of the 2006 IPCC Guidelines	See Annex 10A.2, Tables 10A-4 to 10A-8, Volume 4 of 2006 Guidelines, for derivation of these emission factors	2006 IPCC Guidelines for National Greenhouse Gas Inventories, Volume 4, Table 10.14 - Manure management methane emission factors by temperature for Cattle, Swine, and Buffalo, on page 10.38	IPCC	59	6.73516	Component	AFOLU
416036	4B - Manure Management	3.A.2 - Manure Management	METHANE	2006 IPCC default	Manure management methane emission factors by temperature for Dairy Cows	Liquid/slurry and pit storage systems are commonly used for cattle and swine manure. Limited cropland is available for spreading manure.	Animal category: Dairy Cows				64	kg CH4/head/yr	Equation 10.22 in Volume 4 of the 2006 IPCC Guidelines for National Greenhouse Gas Inventories	Sheet 1 of 1, Category Code 3A2, Page A1.7 of Volume 4 of the 2006 IPCC Guidelines	See Annex 10A.2, Tables 10A-4 to 10A-8, Volume 4 of 2006 Guidelines, for derivation of these emission factors	2006 IPCC Guidelines for National Greenhouse Gas Inventories, Volume 4, Table 10.14 - Manure management methane emission factors by temperature for Cattle, Swine, and Buffalo, on page 10.38	IPCC	64	7.30594	Component	AFOLU
416037	4B - Manure Management	3.A.2 - Manure Management	METHANE	2006 IPCC default	Manure management methane emission factors by temperature for Dairy Cows	Liquid/slurry and pit storage systems are commonly used for cattle and swine manure. Limited cropland is available for spreading manure.	Animal category: Dairy Cows				70	kg CH4/head/yr	Equation 10.22 in Volume 4 of the 2006 IPCC Guidelines for National Greenhouse Gas Inventories	Sheet 1 of 1, Category Code 3A2, Page A1.7 of Volume 4 of the 2006 IPCC Guidelines	See Annex 10A.2, Tables 10A-4 to 10A-8, Volume 4 of 2006 Guidelines, for derivation of these emission factors	2006 IPCC Guidelines for National Greenhouse Gas Inventories, Volume 4, Table 10.14 - Manure management methane emission factors by temperature for Cattle, Swine, and Buffalo, on page 10.38	IPCC	70	7.99087	Component	AFOLU
416038	4B - Manure Management	3.A.2 - Manure Management	METHANE	2006 IPCC default	Manure management methane emission factors by temperature for Dairy Cows	Liquid/slurry and pit storage systems are commonly used for cattle and swine manure. Limited cropland is available for spreading manure.	Animal category: Dairy Cows				75	kg CH4/head/yr	Equation 10.22 in Volume 4 of the 2006 IPCC Guidelines for National Greenhouse Gas Inventories	Sheet 1 of 1, Category Code 3A2, Page A1.7 of Volume 4 of the 2006 IPCC Guidelines	See Annex 10A.2, Tables 10A-4 to 10A-8, Volume 4 of 2006 Guidelines, for derivation of these emission factors	2006 IPCC Guidelines for National Greenhouse Gas Inventories, Volume 4, Table 10.14 - Manure management methane emission factors by temperature for Cattle, Swine, and Buffalo, on page 10.38	IPCC	75	8.56164	Component	AFOLU
416039	4B - Manure Management	3.A.2 - Manure Management	METHANE	2006 IPCC default	Manure management methane emission factors by temperature for Dairy Cows	Liquid/slurry and pit storage systems are commonly used for cattle and swine manure. Limited cropland is available for spreading manure.	Animal category: Dairy Cows				83	kg CH4/head/yr	Equation 10.22 in Volume 4 of the 2006 IPCC Guidelines for National Greenhouse Gas Inventories	Sheet 1 of 1, Category Code 3A2, Page A1.7 of Volume 4 of the 2006 IPCC Guidelines	See Annex 10A.2, Tables 10A-4 to 10A-8, Volume 4 of 2006 Guidelines, for derivation of these emission factors	2006 IPCC Guidelines for National Greenhouse Gas Inventories, Volume 4, Table 10.14 - Manure management methane emission factors by temperature for Cattle, Swine, and Buffalo, on page 10.38	IPCC	83	9.47489	Component	AFOLU
416040	4B - Manure Management	3.A.2 - Manure Management	METHANE	2006 IPCC default	Manure management methane emission factors by temperature for Dairy Cows	Liquid/slurry and pit storage systems are commonly used for cattle and swine manure. Limited cropland is available for spreading manure.	Animal category: Dairy Cows				90	kg CH4/head/yr	Equation 10.22 in Volume 4 of the 2006 IPCC Guidelines for National Greenhouse Gas Inventories	Sheet 1 of 1, Category Code 3A2, Page A1.7 of Volume 4 of the 2006 IPCC Guidelines	See Annex 10A.2, Tables 10A-4 to 10A-8, Volume 4 of 2006 Guidelines, for derivation of these emission factors	2006 IPCC Guidelines for National Greenhouse Gas Inventories, Volume 4, Table 10.14 - Manure management methane emission factors by temperature for Cattle, Swine, and Buffalo, on page 10.38	IPCC	90	10.274	Component	AFOLU
416041	4B - Manure Management	3.A.2 - Manure Management	METHANE	2006 IPCC default	Manure management methane emission factors by temperature for Dairy Cows	Liquid/slurry and pit storage systems are commonly used for cattle and swine manure. Limited cropland is available for spreading manure.	Animal category: Dairy Cows				92	kg CH4/head/yr	Equation 10.22 in Volume 4 of the 2006 IPCC Guidelines for National Greenhouse Gas Inventories	Sheet 1 of 1, Category Code 3A2, Page A1.7 of Volume 4 of the 2006 IPCC Guidelines	See Annex 10A.2, Tables 10A-4 to 10A-8, Volume 4 of 2006 Guidelines, for derivation of these emission factors	2006 IPCC Guidelines for National Greenhouse Gas Inventories, Volume 4, Table 10.14 - Manure management methane emission factors by temperature for Cattle, Swine, and Buffalo, on page 10.38	IPCC	92	10.5023	Component	AFOLU
416042	4B - Manure Management	3.A.2 - Manure Management	METHANE	2006 IPCC default	Manure management methane emission factors by temperature for Other Cattle	Liquid/slurry and pit storage systems are commonly used for cattle and swine manure. Limited cropland is available for spreading manure.	Animal category: Other Cattle				6	kg CH4/head/yr	Equation 10.22 in Volume 4 of the 2006 IPCC Guidelines for National Greenhouse Gas Inventories	Sheet 1 of 1, Category Code 3A2, Page A1.7 of Volume 4 of the 2006 IPCC Guidelines	See Annex 10A.2, Tables 10A-4 to 10A-8, Volume 4 of 2006 Guidelines, for derivation of these emission factors	2006 IPCC Guidelines for National Greenhouse Gas Inventories, Volume 4, Table 10.14 - Manure management methane emission factors by temperature for Cattle, Swine, and Buffalo, on page 10.38	IPCC	6	0.684932	Component	AFOLU
416043	4B - Manure Management	3.A.2 - Manure Management	METHANE	2006 IPCC default	Manure management methane emission factors by temperature for Other Cattle	Liquid/slurry and pit storage systems are commonly used for cattle and swine manure. Limited cropland is available for spreading manure.	Animal category: Other Cattle				7	kg CH4/head/yr	Equation 10.22 in Volume 4 of the 2006 IPCC Guidelines for National Greenhouse Gas Inventories	Sheet 1 of 1, Category Code 3A2, Page A1.7 of Volume 4 of the 2006 IPCC Guidelines	See Annex 10A.2, Tables 10A-4 to 10A-8, Volume 4 of 2006 Guidelines, for derivation of these emission factors	2006 IPCC Guidelines for National Greenhouse Gas Inventories, Volume 4, Table 10.14 - Manure management methane emission factors by temperature for Cattle, Swine, and Buffalo, on page 10.38	IPCC	7	0.799087	Component	AFOLU
416044	4B - Manure Management	3.A.2 - Manure Management	METHANE	2006 IPCC default	Manure management methane emission factors by temperature for Other Cattle	Liquid/slurry and pit storage systems are commonly used for cattle and swine manure. Limited cropland is available for spreading manure.	Animal category: Other Cattle				8	kg CH4/head/yr	Equation 10.22 in Volume 4 of the 2006 IPCC Guidelines for National Greenhouse Gas Inventories	Sheet 1 of 1, Category Code 3A2, Page A1.7 of Volume 4 of the 2006 IPCC Guidelines	See Annex 10A.2, Tables 10A-4 to 10A-8, Volume 4 of 2006 Guidelines, for derivation of these emission factors	2006 IPCC Guidelines for National Greenhouse Gas Inventories, Volume 4, Table 10.14 - Manure management methane emission factors by temperature for Cattle, Swine, and Buffalo, on page 10.38	IPCC	8	0.913242	Component	AFOLU
416045	4B - Manure Management	3.A.2 - Manure Management	METHANE	2006 IPCC default	Manure management methane emission factors by temperature for Other Cattle	Liquid/slurry and pit storage systems are commonly used for cattle and swine manure. Limited cropland is available for spreading manure.	Animal category: Other Cattle				10	kg CH4/head/yr	Equation 10.22 in Volume 4 of the 2006 IPCC Guidelines for National Greenhouse Gas Inventories	Sheet 1 of 1, Category Code 3A2, Page A1.7 of Volume 4 of the 2006 IPCC Guidelines	See Annex 10A.2, Tables 10A-4 to 10A-8, Volume 4 of 2006 Guidelines, for derivation of these emission factors	2006 IPCC Guidelines for National Greenhouse Gas Inventories, Volume 4, Table 10.14 - Manure management methane emission factors by temperature for Cattle, Swine, and Buffalo, on page 10.38	IPCC	10	1.14155	Component	AFOLU
416046	4B - Manure Management	3.A.2 - Manure Management	METHANE	2006 IPCC default	Manure management methane emission factors by temperature for Other Cattle	Liquid/slurry and pit storage systems are commonly used for cattle and swine manure. Limited cropland is available for spreading manure.	Animal category: Other Cattle				11	kg CH4/head/yr	Equation 10.22 in Volume 4 of the 2006 IPCC Guidelines for National Greenhouse Gas Inventories	Sheet 1 of 1, Category Code 3A2, Page A1.7 of Volume 4 of the 2006 IPCC Guidelines	See Annex 10A.2, Tables 10A-4 to 10A-8, Volume 4 of 2006 Guidelines, for derivation of these emission factors	2006 IPCC Guidelines for National Greenhouse Gas Inventories, Volume 4, Table 10.14 - Manure management methane emission factors by temperature for Cattle, Swine, and Buffalo, on page 10.38	IPCC	11	1.25571	Component	AFOLU
416047	4B - Manure Management	3.A.2 - Manure Management	METHANE	2006 IPCC default	Manure management methane emission factors by temperature for Other Cattle	Liquid/slurry and pit storage systems are commonly used for cattle and swine manure. Limited cropland is available for spreading manure.	Animal category: Other Cattle				12	kg CH4/head/yr	Equation 10.22 in Volume 4 of the 2006 IPCC Guidelines for National Greenhouse Gas Inventories	Sheet 1 of 1, Category Code 3A2, Page A1.7 of Volume 4 of the 2006 IPCC Guidelines	See Annex 10A.2, Tables 10A-4 to 10A-8, Volume 4 of 2006 Guidelines, for derivation of these emission factors	2006 IPCC Guidelines for National Greenhouse Gas Inventories, Volume 4, Table 10.14 - Manure management methane emission factors by temperature for Cattle, Swine, and Buffalo, on page 10.38	IPCC	12	1.36986	Component	AFOLU
416048	4B - Manure Management	3.A.2 - Manure Management	METHANE	2006 IPCC default	Manure management methane emission factors by temperature for Other Cattle	Liquid/slurry and pit storage systems are commonly used for cattle and swine manure. Limited cropland is available for spreading manure.	Animal category: Other Cattle				13	kg CH4/head/yr	Equation 10.22 in Volume 4 of the 2006 IPCC Guidelines for National Greenhouse Gas Inventories	Sheet 1 of 1, Category Code 3A2, Page A1.7 of Volume 4 of the 2006 IPCC Guidelines	See Annex 10A.2, Tables 10A-4 to 10A-8, Volume 4 of 2006 Guidelines, for derivation of these emission factors	2006 IPCC Guidelines for National Greenhouse Gas Inventories, Volume 4, Table 10.14 - Manure management methane emission factors by temperature for Cattle, Swine, and Buffalo, on page 10.38	IPCC	13	1.48402	Component	AFOLU
416049	4B - Manure Management	3.A.2 - Manure Management	METHANE	2006 IPCC default	Manure management methane emission factors by temperature for Other Cattle	Liquid/slurry and pit storage systems are commonly used for cattle and swine manure. Limited cropland is available for spreading manure.	Animal category: Other Cattle				14	kg CH4/head/yr	Equation 10.22 in Volume 4 of the 2006 IPCC Guidelines for National Greenhouse Gas Inventories	Sheet 1 of 1, Category Code 3A2, Page A1.7 of Volume 4 of the 2006 IPCC Guidelines	See Annex 10A.2, Tables 10A-4 to 10A-8, Volume 4 of 2006 Guidelines, for derivation of these emission factors	2006 IPCC Guidelines for National Greenhouse Gas Inventories, Volume 4, Table 10.14 - Manure management methane emission factors by temperature for Cattle, Swine, and Buffalo, on page 10.38	IPCC	14	1.59817	Component	AFOLU
416050	4B - Manure Management	3.A.2 - Manure Management	METHANE	2006 IPCC default	Manure management methane emission factors by temperature for Other Cattle	Liquid/slurry and pit storage systems are commonly used for cattle and swine manure. Limited cropland is available for spreading manure.	Animal category: Other Cattle				15	kg CH4/head/yr	Equation 10.22 in Volume 4 of the 2006 IPCC Guidelines for National Greenhouse Gas Inventories	Sheet 1 of 1, Category Code 3A2, Page A1.7 of Volume 4 of the 2006 IPCC Guidelines	See Annex 10A.2, Tables 10A-4 to 10A-8, Volume 4 of 2006 Guidelines, for derivation of these emission factors	2006 IPCC Guidelines for National Greenhouse Gas Inventories, Volume 4, Table 10.14 - Manure management methane emission factors by temperature for Cattle, Swine, and Buffalo, on page 10.38	IPCC	15	1.71233	Component	AFOLU
416051	4B - Manure Management	3.A.2 - Manure Management	METHANE	2006 IPCC default	Manure management methane emission factors by temperature for Other Cattle	Liquid/slurry and pit storage systems are commonly used for cattle and swine manure. Limited cropland is available for spreading manure.	Animal category: Other Cattle				16	kg CH4/head/yr	Equation 10.22 in Volume 4 of the 2006 IPCC Guidelines for National Greenhouse Gas Inventories	Sheet 1 of 1, Category Code 3A2, Page A1.7 of Volume 4 of the 2006 IPCC Guidelines	See Annex 10A.2, Tables 10A-4 to 10A-8, Volume 4 of 2006 Guidelines, for derivation of these emission factors	2006 IPCC Guidelines for National Greenhouse Gas Inventories, Volume 4, Table 10.14 - Manure management methane emission factors by temperature for Cattle, Swine, and Buffalo, on page 10.38	IPCC	16	1.82648	Component	AFOLU
416052	4B - Manure Management	3.A.2 - Manure Management	METHANE	2006 IPCC default	Manure management methane emission factors by temperature for Other Cattle	Liquid/slurry and pit storage systems are commonly used for cattle and swine manure. Limited cropland is available for spreading manure.	Animal category: Other Cattle				17	kg CH4/head/yr	Equation 10.22 in Volume 4 of the 2006 IPCC Guidelines for National Greenhouse Gas Inventories	Sheet 1 of 1, Category Code 3A2, Page A1.7 of Volume 4 of the 2006 IPCC Guidelines	See Annex 10A.2, Tables 10A-4 to 10A-8, Volume 4 of 2006 Guidelines, for derivation of these emission factors	2006 IPCC Guidelines for National Greenhouse Gas Inventories, Volume 4, Table 10.14 - Manure management methane emission factors by temperature for Cattle, Swine, and Buffalo, on page 10.38	IPCC	17	1.94064	Component	AFOLU
416053	4B - Manure Management	3.A.2 - Manure Management	METHANE	2006 IPCC default	Manure management methane emission factors by temperature for Other Cattle	Liquid/slurry and pit storage systems are commonly used for cattle and swine manure. Limited cropland is available for spreading manure.	Animal category: Other Cattle				18	kg CH4/head/yr	Equation 10.22 in Volume 4 of the 2006 IPCC Guidelines for National Greenhouse Gas Inventories	Sheet 1 of 1, Category Code 3A2, Page A1.7 of Volume 4 of the 2006 IPCC Guidelines	See Annex 10A.2, Tables 10A-4 to 10A-8, Volume 4 of 2006 Guidelines, for derivation of these emission factors	2006 IPCC Guidelines for National Greenhouse Gas Inventories, Volume 4, Table 10.14 - Manure management methane emission factors by temperature for Cattle, Swine, and Buffalo, on page 10.38	IPCC	18	2.05479	Component	AFOLU
416054	4B - Manure Management	3.A.2 - Manure Management	METHANE	2006 IPCC default	Manure management methane emission factors by temperature for Other Cattle	Liquid/slurry and pit storage systems are commonly used for cattle and swine manure. Limited cropland is available for spreading manure.	Animal category: Other Cattle				20	kg CH4/head/yr	Equation 10.22 in Volume 4 of the 2006 IPCC Guidelines for National Greenhouse Gas Inventories	Sheet 1 of 1, Category Code 3A2, Page A1.7 of Volume 4 of the 2006 IPCC Guidelines	See Annex 10A.2, Tables 10A-4 to 10A-8, Volume 4 of 2006 Guidelines, for derivation of these emission factors	2006 IPCC Guidelines for National Greenhouse Gas Inventories, Volume 4, Table 10.14 - Manure management methane emission factors by temperature for Cattle, Swine, and Buffalo, on page 10.38	IPCC	20	2.28311	Component	AFOLU
416055	4B - Manure Management	3.A.2 - Manure Management	METHANE	2006 IPCC default	Manure management methane emission factors by temperature for Other Cattle	Liquid/slurry and pit storage systems are commonly used for cattle and swine manure. Limited cropland is available for spreading manure.	Animal category: Other Cattle				21	kg CH4/head/yr	Equation 10.22 in Volume 4 of the 2006 IPCC Guidelines for National Greenhouse Gas Inventories	Sheet 1 of 1, Category Code 3A2, Page A1.7 of Volume 4 of the 2006 IPCC Guidelines	See Annex 10A.2, Tables 10A-4 to 10A-8, Volume 4 of 2006 Guidelines, for derivation of these emission factors	2006 IPCC Guidelines for National Greenhouse Gas Inventories, Volume 4, Table 10.14 - Manure management methane emission factors by temperature for Cattle, Swine, and Buffalo, on page 10.38	IPCC	21	2.39726	Component	AFOLU
416056	4B - Manure Management	3.A.2 - Manure Management	METHANE	2006 IPCC default	Manure management methane emission factors by temperature for Other Cattle	Liquid/slurry and pit storage systems are commonly used for cattle and swine manure. Limited cropland is available for spreading manure.	Animal category: Other Cattle				24	kg CH4/head/yr	Equation 10.22 in Volume 4 of the 2006 IPCC Guidelines for National Greenhouse Gas Inventories	Sheet 1 of 1, Category Code 3A2, Page A1.7 of Volume 4 of the 2006 IPCC Guidelines	See Annex 10A.2, Tables 10A-4 to 10A-8, Volume 4 of 2006 Guidelines, for derivation of these emission factors	2006 IPCC Guidelines for National Greenhouse Gas Inventories, Volume 4, Table 10.14 - Manure management methane emission factors by temperature for Cattle, Swine, and Buffalo, on page 10.38	IPCC	24	2.73973	Component	AFOLU
416057	4B - Manure Management	3.A.2 - Manure Management	METHANE	2006 IPCC default	Manure management methane emission factors by temperature for Other Cattle	Liquid/slurry and pit storage systems are commonly used for cattle and swine manure. Limited cropland is available for spreading manure.	Animal category: Other Cattle				25	kg CH4/head/yr	Equation 10.22 in Volume 4 of the 2006 IPCC Guidelines for National Greenhouse Gas Inventories	Sheet 1 of 1, Category Code 3A2, Page A1.7 of Volume 4 of the 2006 IPCC Guidelines	See Annex 10A.2, Tables 10A-4 to 10A-8, Volume 4 of 2006 Guidelines, for derivation of these emission factors	2006 IPCC Guidelines for National Greenhouse Gas Inventories, Volume 4, Table 10.14 - Manure management methane emission factors by temperature for Cattle, Swine, and Buffalo, on page 10.38	IPCC	25	2.85388	Component	AFOLU
416058	4B - Manure Management	3.A.2 - Manure Management	METHANE	2006 IPCC default	Manure management methane emission factors by temperature for Other Cattle	Liquid/slurry and pit storage systems are commonly used for cattle and swine manure. Limited cropland is available for spreading manure.	Animal category: Other Cattle				26	kg CH4/head/yr	Equation 10.22 in Volume 4 of the 2006 IPCC Guidelines for National Greenhouse Gas Inventories	Sheet 1 of 1, Category Code 3A2, Page A1.7 of Volume 4 of the 2006 IPCC Guidelines	See Annex 10A.2, Tables 10A-4 to 10A-8, Volume 4 of 2006 Guidelines, for derivation of these emission factors	2006 IPCC Guidelines for National Greenhouse Gas Inventories, Volume 4, Table 10.14 - Manure management methane emission factors by temperature for Cattle, Swine, and Buffalo, on page 10.38	IPCC	26	2.96804	Component	AFOLU
416059	4B - Manure Management	3.A.2 - Manure Management	METHANE	2006 IPCC default	Manure management methane emission factors by temperature for Market Swine	Liquid/slurry and pit storage systems are commonly used for cattle and swine manure. Limited cropland is available for spreading manure.	Animal category: Market Swine				6	kg CH4/head/yr	Equation 10.22 in Volume 4 of the 2006 IPCC Guidelines for National Greenhouse Gas Inventories	Sheet 1 of 1, Category Code 3A2, Page A1.7 of Volume 4 of the 2006 IPCC Guidelines	See Annex 10A.2, Tables 10A-4 to 10A-8, Volume 4 of 2006 Guidelines, for derivation of these emission factors	2006 IPCC Guidelines for National Greenhouse Gas Inventories, Volume 4, Table 10.14 - Manure management methane emission factors by temperature for Cattle, Swine, and Buffalo, on page 10.38	IPCC	6	0.684932	Component	AFOLU
416060	4B - Manure Management	3.A.2 - Manure Management	METHANE	2006 IPCC default	Manure management methane emission factors by temperature for Market Swine	Liquid/slurry and pit storage systems are commonly used for cattle and swine manure. Limited cropland is available for spreading manure.	Animal category: Market Swine				7	kg CH4/head/yr	Equation 10.22 in Volume 4 of the 2006 IPCC Guidelines for National Greenhouse Gas Inventories	Sheet 1 of 1, Category Code 3A2, Page A1.7 of Volume 4 of the 2006 IPCC Guidelines	See Annex 10A.2, Tables 10A-4 to 10A-8, Volume 4 of 2006 Guidelines, for derivation of these emission factors	2006 IPCC Guidelines for National Greenhouse Gas Inventories, Volume 4, Table 10.14 - Manure management methane emission factors by temperature for Cattle, Swine, and Buffalo, on page 10.38	IPCC	7	0.799087	Component	AFOLU
416061	4B - Manure Management	3.A.2 - Manure Management	METHANE	2006 IPCC default	Manure management methane emission factors by temperature for Market Swine	Liquid/slurry and pit storage systems are commonly used for cattle and swine manure. Limited cropland is available for spreading manure.	Animal category: Market Swine				8	kg CH4/head/yr	Equation 10.22 in Volume 4 of the 2006 IPCC Guidelines for National Greenhouse Gas Inventories	Sheet 1 of 1, Category Code 3A2, Page A1.7 of Volume 4 of the 2006 IPCC Guidelines	See Annex 10A.2, Tables 10A-4 to 10A-8, Volume 4 of 2006 Guidelines, for derivation of these emission factors	2006 IPCC Guidelines for National Greenhouse Gas Inventories, Volume 4, Table 10.14 - Manure management methane emission factors by temperature for Cattle, Swine, and Buffalo, on page 10.38	IPCC	8	0.913242	Component	AFOLU
416062	4B - Manure Management	3.A.2 - Manure Management	METHANE	2006 IPCC default	Manure management methane emission factors by temperature for Market Swine	Liquid/slurry and pit storage systems are commonly used for cattle and swine manure. Limited cropland is available for spreading manure.	Animal category: Market Swine				9	kg CH4/head/yr	Equation 10.22 in Volume 4 of the 2006 IPCC Guidelines for National Greenhouse Gas Inventories	Sheet 1 of 1, Category Code 3A2, Page A1.7 of Volume 4 of the 2006 IPCC Guidelines	See Annex 10A.2, Tables 10A-4 to 10A-8, Volume 4 of 2006 Guidelines, for derivation of these emission factors	2006 IPCC Guidelines for National Greenhouse Gas Inventories, Volume 4, Table 10.14 - Manure management methane emission factors by temperature for Cattle, Swine, and Buffalo, on page 10.38	IPCC	9	1.0274	Component	AFOLU
416063	4B - Manure Management	3.A.2 - Manure Management	METHANE	2006 IPCC default	Manure management methane emission factors by temperature for Market Swine	Liquid/slurry and pit storage systems are commonly used for cattle and swine manure. Limited cropland is available for spreading manure.	Animal category: Market Swine				10	kg CH4/head/yr	Equation 10.22 in Volume 4 of the 2006 IPCC Guidelines for National Greenhouse Gas Inventories	Sheet 1 of 1, Category Code 3A2, Page A1.7 of Volume 4 of the 2006 IPCC Guidelines	See Annex 10A.2, Tables 10A-4 to 10A-8, Volume 4 of 2006 Guidelines, for derivation of these emission factors	2006 IPCC Guidelines for National Greenhouse Gas Inventories, Volume 4, Table 10.14 - Manure management methane emission factors by temperature for Cattle, Swine, and Buffalo, on page 10.38	IPCC	10	1.14155	Component	AFOLU
416064	4B - Manure Management	3.A.2 - Manure Management	METHANE	2006 IPCC default	Manure management methane emission factors by temperature for Market Swine	Liquid/slurry and pit storage systems are commonly used for cattle and swine manure. Limited cropland is available for spreading manure.	Animal category: Market Swine				11	kg CH4/head/yr	Equation 10.22 in Volume 4 of the 2006 IPCC Guidelines for National Greenhouse Gas Inventories	Sheet 1 of 1, Category Code 3A2, Page A1.7 of Volume 4 of the 2006 IPCC Guidelines	See Annex 10A.2, Tables 10A-4 to 10A-8, Volume 4 of 2006 Guidelines, for derivation of these emission factors	2006 IPCC Guidelines for National Greenhouse Gas Inventories, Volume 4, Table 10.14 - Manure management methane emission factors by temperature for Cattle, Swine, and Buffalo, on page 10.38	IPCC	11	1.25571	Component	AFOLU
416065	4B - Manure Management	3.A.2 - Manure Management	METHANE	2006 IPCC default	Manure management methane emission factors by temperature for Market Swine	Liquid/slurry and pit storage systems are commonly used for cattle and swine manure. Limited cropland is available for spreading manure.	Animal category: Market Swine				12	kg CH4/head/yr	Equation 10.22 in Volume 4 of the 2006 IPCC Guidelines for National Greenhouse Gas Inventories	Sheet 1 of 1, Category Code 3A2, Page A1.7 of Volume 4 of the 2006 IPCC Guidelines	See Annex 10A.2, Tables 10A-4 to 10A-8, Volume 4 of 2006 Guidelines, for derivation of these emission factors	2006 IPCC Guidelines for National Greenhouse Gas Inventories, Volume 4, Table 10.14 - Manure management methane emission factors by temperature for Cattle, Swine, and Buffalo, on page 10.38	IPCC	12	1.36986	Component	AFOLU
416066	4B - Manure Management	3.A.2 - Manure Management	METHANE	2006 IPCC default	Manure management methane emission factors by temperature for Market Swine	Liquid/slurry and pit storage systems are commonly used for cattle and swine manure. Limited cropland is available for spreading manure.	Animal category: Market Swine				13	kg CH4/head/yr	Equation 10.22 in Volume 4 of the 2006 IPCC Guidelines for National Greenhouse Gas Inventories	Sheet 1 of 1, Category Code 3A2, Page A1.7 of Volume 4 of the 2006 IPCC Guidelines	See Annex 10A.2, Tables 10A-4 to 10A-8, Volume 4 of 2006 Guidelines, for derivation of these emission factors	2006 IPCC Guidelines for National Greenhouse Gas Inventories, Volume 4, Table 10.14 - Manure management methane emission factors by temperature for Cattle, Swine, and Buffalo, on page 10.38	IPCC	13	1.48402	Component	AFOLU
416067	4B - Manure Management	3.A.2 - Manure Management	METHANE	2006 IPCC default	Manure management methane emission factors by temperature for Market Swine	Liquid/slurry and pit storage systems are commonly used for cattle and swine manure. Limited cropland is available for spreading manure.	Animal category: Market Swine				14	kg CH4/head/yr	Equation 10.22 in Volume 4 of the 2006 IPCC Guidelines for National Greenhouse Gas Inventories	Sheet 1 of 1, Category Code 3A2, Page A1.7 of Volume 4 of the 2006 IPCC Guidelines	See Annex 10A.2, Tables 10A-4 to 10A-8, Volume 4 of 2006 Guidelines, for derivation of these emission factors	2006 IPCC Guidelines for National Greenhouse Gas Inventories, Volume 4, Table 10.14 - Manure management methane emission factors by temperature for Cattle, Swine, and Buffalo, on page 10.38	IPCC	14	1.59817	Component	AFOLU
416068	4B - Manure Management	3.A.2 - Manure Management	METHANE	2006 IPCC default	Manure management methane emission factors by temperature for Market Swine	Liquid/slurry and pit storage systems are commonly used for cattle and swine manure. Limited cropland is available for spreading manure.	Animal category: Market Swine				15	kg CH4/head/yr	Equation 10.22 in Volume 4 of the 2006 IPCC Guidelines for National Greenhouse Gas Inventories	Sheet 1 of 1, Category Code 3A2, Page A1.7 of Volume 4 of the 2006 IPCC Guidelines	See Annex 10A.2, Tables 10A-4 to 10A-8, Volume 4 of 2006 Guidelines, for derivation of these emission factors	2006 IPCC Guidelines for National Greenhouse Gas Inventories, Volume 4, Table 10.14 - Manure management methane emission factors by temperature for Cattle, Swine, and Buffalo, on page 10.38	IPCC	15	1.71233	Component	AFOLU
416069	4B - Manure Management	3.A.2 - Manure Management	METHANE	2006 IPCC default	Manure management methane emission factors by temperature for Market Swine	Liquid/slurry and pit storage systems are commonly used for cattle and swine manure. Limited cropland is available for spreading manure.	Animal category: Market Swine				16	kg CH4/head/yr	Equation 10.22 in Volume 4 of the 2006 IPCC Guidelines for National Greenhouse Gas Inventories	Sheet 1 of 1, Category Code 3A2, Page A1.7 of Volume 4 of the 2006 IPCC Guidelines	See Annex 10A.2, Tables 10A-4 to 10A-8, Volume 4 of 2006 Guidelines, for derivation of these emission factors	2006 IPCC Guidelines for National Greenhouse Gas Inventories, Volume 4, Table 10.14 - Manure management methane emission factors by temperature for Cattle, Swine, and Buffalo, on page 10.38	IPCC	16	1.82648	Component	AFOLU
416070	4B - Manure Management	3.A.2 - Manure Management	METHANE	2006 IPCC default	Manure management methane emission factors by temperature for Market Swine	Liquid/slurry and pit storage systems are commonly used for cattle and swine manure. Limited cropland is available for spreading manure.	Animal category: Market Swine				18	kg CH4/head/yr	Equation 10.22 in Volume 4 of the 2006 IPCC Guidelines for National Greenhouse Gas Inventories	Sheet 1 of 1, Category Code 3A2, Page A1.7 of Volume 4 of the 2006 IPCC Guidelines	See Annex 10A.2, Tables 10A-4 to 10A-8, Volume 4 of 2006 Guidelines, for derivation of these emission factors	2006 IPCC Guidelines for National Greenhouse Gas Inventories, Volume 4, Table 10.14 - Manure management methane emission factors by temperature for Cattle, Swine, and Buffalo, on page 10.38	IPCC	18	2.05479	Component	AFOLU
416071	4B - Manure Management	3.A.2 - Manure Management	METHANE	2006 IPCC default	Manure management methane emission factors by temperature for Market Swine	Liquid/slurry and pit storage systems are commonly used for cattle and swine manure. Limited cropland is available for spreading manure.	Animal category: Market Swine				19	kg CH4/head/yr	Equation 10.22 in Volume 4 of the 2006 IPCC Guidelines for National Greenhouse Gas Inventories	Sheet 1 of 1, Category Code 3A2, Page A1.7 of Volume 4 of the 2006 IPCC Guidelines	See Annex 10A.2, Tables 10A-4 to 10A-8, Volume 4 of 2006 Guidelines, for derivation of these emission factors	2006 IPCC Guidelines for National Greenhouse Gas Inventories, Volume 4, Table 10.14 - Manure management methane emission factors by temperature for Cattle, Swine, and Buffalo, on page 10.38	IPCC	19	2.16895	Component	AFOLU
416072	4B - Manure Management	3.A.2 - Manure Management	METHANE	2006 IPCC default	Manure management methane emission factors by temperature for Market Swine	Liquid/slurry and pit storage systems are commonly used for cattle and swine manure. Limited cropland is available for spreading manure.	Animal category: Market Swine				21	kg CH4/head/yr	Equation 10.22 in Volume 4 of the 2006 IPCC Guidelines for National Greenhouse Gas Inventories	Sheet 1 of 1, Category Code 3A2, Page A1.7 of Volume 4 of the 2006 IPCC Guidelines	See Annex 10A.2, Tables 10A-4 to 10A-8, Volume 4 of 2006 Guidelines, for derivation of these emission factors	2006 IPCC Guidelines for National Greenhouse Gas Inventories, Volume 4, Table 10.14 - Manure management methane emission factors by temperature for Cattle, Swine, and Buffalo, on page 10.38	IPCC	21	2.39726	Component	AFOLU
416073	4B - Manure Management	3.A.2 - Manure Management	METHANE	2006 IPCC default	Manure management methane emission factors by temperature for Breeding Swine	Liquid/slurry and pit storage systems are commonly used for cattle and swine manure. Limited cropland is available for spreading manure.	Animal category: Breeding Swine				9	kg CH4/head/yr	Equation 10.22 in Volume 4 of the 2006 IPCC Guidelines for National Greenhouse Gas Inventories	Sheet 1 of 1, Category Code 3A2, Page A1.7 of Volume 4 of the 2006 IPCC Guidelines	See Annex 10A.2, Tables 10A-4 to 10A-8, Volume 4 of 2006 Guidelines, for derivation of these emission factors	2006 IPCC Guidelines for National Greenhouse Gas Inventories, Volume 4, Table 10.14 - Manure management methane emission factors by temperature for Cattle, Swine, and Buffalo, on page 10.38	IPCC	9	1.0274	Component	AFOLU
416074	4B - Manure Management	3.A.2 - Manure Management	METHANE	2006 IPCC default	Manure management methane emission factors by temperature for Breeding Swine	Liquid/slurry and pit storage systems are commonly used for cattle and swine manure. Limited cropland is available for spreading manure.	Animal category: Breeding Swine				10	kg CH4/head/yr	Equation 10.22 in Volume 4 of the 2006 IPCC Guidelines for National Greenhouse Gas Inventories	Sheet 1 of 1, Category Code 3A2, Page A1.7 of Volume 4 of the 2006 IPCC Guidelines	See Annex 10A.2, Tables 10A-4 to 10A-8, Volume 4 of 2006 Guidelines, for derivation of these emission factors	2006 IPCC Guidelines for National Greenhouse Gas Inventories, Volume 4, Table 10.14 - Manure management methane emission factors by temperature for Cattle, Swine, and Buffalo, on page 10.38	IPCC	10	1.14155	Component	AFOLU
416075	4B - Manure Management	3.A.2 - Manure Management	METHANE	2006 IPCC default	Manure management methane emission factors by temperature for Breeding Swine	Liquid/slurry and pit storage systems are commonly used for cattle and swine manure. Limited cropland is available for spreading manure.	Animal category: Breeding Swine				11	kg CH4/head/yr	Equation 10.22 in Volume 4 of the 2006 IPCC Guidelines for National Greenhouse Gas Inventories	Sheet 1 of 1, Category Code 3A2, Page A1.7 of Volume 4 of the 2006 IPCC Guidelines	See Annex 10A.2, Tables 10A-4 to 10A-8, Volume 4 of 2006 Guidelines, for derivation of these emission factors	2006 IPCC Guidelines for National Greenhouse Gas Inventories, Volume 4, Table 10.14 - Manure management methane emission factors by temperature for Cattle, Swine, and Buffalo, on page 10.38	IPCC	11	1.25571	Component	AFOLU
416076	4B - Manure Management	3.A.2 - Manure Management	METHANE	2006 IPCC default	Manure management methane emission factors by temperature for Breeding Swine	Liquid/slurry and pit storage systems are commonly used for cattle and swine manure. Limited cropland is available for spreading manure.	Animal category: Breeding Swine				12	kg CH4/head/yr	Equation 10.22 in Volume 4 of the 2006 IPCC Guidelines for National Greenhouse Gas Inventories	Sheet 1 of 1, Category Code 3A2, Page A1.7 of Volume 4 of the 2006 IPCC Guidelines	See Annex 10A.2, Tables 10A-4 to 10A-8, Volume 4 of 2006 Guidelines, for derivation of these emission factors	2006 IPCC Guidelines for National Greenhouse Gas Inventories, Volume 4, Table 10.14 - Manure management methane emission factors by temperature for Cattle, Swine, and Buffalo, on page 10.38	IPCC	12	1.36986	Component	AFOLU
416077	4B - Manure Management	3.A.2 - Manure Management	METHANE	2006 IPCC default	Manure management methane emission factors by temperature for Breeding Swine	Liquid/slurry and pit storage systems are commonly used for cattle and swine manure. Limited cropland is available for spreading manure.	Animal category: Breeding Swine				13	kg CH4/head/yr	Equation 10.22 in Volume 4 of the 2006 IPCC Guidelines for National Greenhouse Gas Inventories	Sheet 1 of 1, Category Code 3A2, Page A1.7 of Volume 4 of the 2006 IPCC Guidelines	See Annex 10A.2, Tables 10A-4 to 10A-8, Volume 4 of 2006 Guidelines, for derivation of these emission factors	2006 IPCC Guidelines for National Greenhouse Gas Inventories, Volume 4, Table 10.14 - Manure management methane emission factors by temperature for Cattle, Swine, and Buffalo, on page 10.38	IPCC	13	1.48402	Component	AFOLU
416078	4B - Manure Management	3.A.2 - Manure Management	METHANE	2006 IPCC default	Manure management methane emission factors by temperature for Breeding Swine	Liquid/slurry and pit storage systems are commonly used for cattle and swine manure. Limited cropland is available for spreading manure.	Animal category: Breeding Swine				14	kg CH4/head/yr	Equation 10.22 in Volume 4 of the 2006 IPCC Guidelines for National Greenhouse Gas Inventories	Sheet 1 of 1, Category Code 3A2, Page A1.7 of Volume 4 of the 2006 IPCC Guidelines	See Annex 10A.2, Tables 10A-4 to 10A-8, Volume 4 of 2006 Guidelines, for derivation of these emission factors	2006 IPCC Guidelines for National Greenhouse Gas Inventories, Volume 4, Table 10.14 - Manure management methane emission factors by temperature for Cattle, Swine, and Buffalo, on page 10.38	IPCC	14	1.59817	Component	AFOLU
416079	4B - Manure Management	3.A.2 - Manure Management	METHANE	2006 IPCC default	Manure management methane emission factors by temperature for Breeding Swine	Liquid/slurry and pit storage systems are commonly used for cattle and swine manure. Limited cropland is available for spreading manure.	Animal category: Breeding Swine				15	kg CH4/head/yr	Equation 10.22 in Volume 4 of the 2006 IPCC Guidelines for National Greenhouse Gas Inventories	Sheet 1 of 1, Category Code 3A2, Page A1.7 of Volume 4 of the 2006 IPCC Guidelines	See Annex 10A.2, Tables 10A-4 to 10A-8, Volume 4 of 2006 Guidelines, for derivation of these emission factors	2006 IPCC Guidelines for National Greenhouse Gas Inventories, Volume 4, Table 10.14 - Manure management methane emission factors by temperature for Cattle, Swine, and Buffalo, on page 10.38	IPCC	15	1.71233	Component	AFOLU
416080	4B - Manure Management	3.A.2 - Manure Management	METHANE	2006 IPCC default	Manure management methane emission factors by temperature for Breeding Swine	Liquid/slurry and pit storage systems are commonly used for cattle and swine manure. Limited cropland is available for spreading manure.	Animal category: Breeding Swine				16	kg CH4/head/yr	Equation 10.22 in Volume 4 of the 2006 IPCC Guidelines for National Greenhouse Gas Inventories	Sheet 1 of 1, Category Code 3A2, Page A1.7 of Volume 4 of the 2006 IPCC Guidelines	See Annex 10A.2, Tables 10A-4 to 10A-8, Volume 4 of 2006 Guidelines, for derivation of these emission factors	2006 IPCC Guidelines for National Greenhouse Gas Inventories, Volume 4, Table 10.14 - Manure management methane emission factors by temperature for Cattle, Swine, and Buffalo, on page 10.38	IPCC	16	1.82648	Component	AFOLU
416081	4B - Manure Management	3.A.2 - Manure Management	METHANE	2006 IPCC default	Manure management methane emission factors by temperature for Breeding Swine	Liquid/slurry and pit storage systems are commonly used for cattle and swine manure. Limited cropland is available for spreading manure.	Animal category: Breeding Swine				17	kg CH4/head/yr	Equation 10.22 in Volume 4 of the 2006 IPCC Guidelines for National Greenhouse Gas Inventories	Sheet 1 of 1, Category Code 3A2, Page A1.7 of Volume 4 of the 2006 IPCC Guidelines	See Annex 10A.2, Tables 10A-4 to 10A-8, Volume 4 of 2006 Guidelines, for derivation of these emission factors	2006 IPCC Guidelines for National Greenhouse Gas Inventories, Volume 4, Table 10.14 - Manure management methane emission factors by temperature for Cattle, Swine, and Buffalo, on page 10.38	IPCC	17	1.94064	Component	AFOLU
416082	4B - Manure Management	3.A.2 - Manure Management	METHANE	2006 IPCC default	Manure management methane emission factors by temperature for Breeding Swine	Liquid/slurry and pit storage systems are commonly used for cattle and swine manure. Limited cropland is available for spreading manure.	Animal category: Breeding Swine				19	kg CH4/head/yr	Equation 10.22 in Volume 4 of the 2006 IPCC Guidelines for National Greenhouse Gas Inventories	Sheet 1 of 1, Category Code 3A2, Page A1.7 of Volume 4 of the 2006 IPCC Guidelines	See Annex 10A.2, Tables 10A-4 to 10A-8, Volume 4 of 2006 Guidelines, for derivation of these emission factors	2006 IPCC Guidelines for National Greenhouse Gas Inventories, Volume 4, Table 10.14 - Manure management methane emission factors by temperature for Cattle, Swine, and Buffalo, on page 10.38	IPCC	19	2.16895	Component	AFOLU
416083	4B - Manure Management	3.A.2 - Manure Management	METHANE	2006 IPCC default	Manure management methane emission factors by temperature for Breeding Swine	Liquid/slurry and pit storage systems are commonly used for cattle and swine manure. Limited cropland is available for spreading manure.	Animal category: Breeding Swine				20	kg CH4/head/yr	Equation 10.22 in Volume 4 of the 2006 IPCC Guidelines for National Greenhouse Gas Inventories	Sheet 1 of 1, Category Code 3A2, Page A1.7 of Volume 4 of the 2006 IPCC Guidelines	See Annex 10A.2, Tables 10A-4 to 10A-8, Volume 4 of 2006 Guidelines, for derivation of these emission factors	2006 IPCC Guidelines for National Greenhouse Gas Inventories, Volume 4, Table 10.14 - Manure management methane emission factors by temperature for Cattle, Swine, and Buffalo, on page 10.38	IPCC	20	2.28311	Component	AFOLU
416084	4B - Manure Management	3.A.2 - Manure Management	METHANE	2006 IPCC default	Manure management methane emission factors by temperature for Breeding Swine	Liquid/slurry and pit storage systems are commonly used for cattle and swine manure. Limited cropland is available for spreading manure.	Animal category: Breeding Swine				22	kg CH4/head/yr	Equation 10.22 in Volume 4 of the 2006 IPCC Guidelines for National Greenhouse Gas Inventories	Sheet 1 of 1, Category Code 3A2, Page A1.7 of Volume 4 of the 2006 IPCC Guidelines	See Annex 10A.2, Tables 10A-4 to 10A-8, Volume 4 of 2006 Guidelines, for derivation of these emission factors	2006 IPCC Guidelines for National Greenhouse Gas Inventories, Volume 4, Table 10.14 - Manure management methane emission factors by temperature for Cattle, Swine, and Buffalo, on page 10.38	IPCC	22	2.51142	Component	AFOLU
416085	4B - Manure Management	3.A.2 - Manure Management	METHANE	2006 IPCC default	Manure management methane emission factors by temperature for Breeding Swine	Liquid/slurry and pit storage systems are commonly used for cattle and swine manure. Limited cropland is available for spreading manure.	Animal category: Breeding Swine				23	kg CH4/head/yr	Equation 10.22 in Volume 4 of the 2006 IPCC Guidelines for National Greenhouse Gas Inventories	Sheet 1 of 1, Category Code 3A2, Page A1.7 of Volume 4 of the 2006 IPCC Guidelines	See Annex 10A.2, Tables 10A-4 to 10A-8, Volume 4 of 2006 Guidelines, for derivation of these emission factors	2006 IPCC Guidelines for National Greenhouse Gas Inventories, Volume 4, Table 10.14 - Manure management methane emission factors by temperature for Cattle, Swine, and Buffalo, on page 10.38	IPCC	23	2.62557	Component	AFOLU
416086	4B - Manure Management	3.A.2 - Manure Management	METHANE	2006 IPCC default	Manure management methane emission factors by temperature for Breeding Swine	Liquid/slurry and pit storage systems are commonly used for cattle and swine manure. Limited cropland is available for spreading manure.	Animal category: Breeding Swine				25	kg CH4/head/yr	Equation 10.22 in Volume 4 of the 2006 IPCC Guidelines for National Greenhouse Gas Inventories	Sheet 1 of 1, Category Code 3A2, Page A1.7 of Volume 4 of the 2006 IPCC Guidelines	See Annex 10A.2, Tables 10A-4 to 10A-8, Volume 4 of 2006 Guidelines, for derivation of these emission factors	2006 IPCC Guidelines for National Greenhouse Gas Inventories, Volume 4, Table 10.14 - Manure management methane emission factors by temperature for Cattle, Swine, and Buffalo, on page 10.38	IPCC	25	2.85388	Component	AFOLU
416087	4B - Manure Management	3.A.2 - Manure Management	METHANE	2006 IPCC default	Manure management methane emission factors by temperature for Breeding Swine	Liquid/slurry and pit storage systems are commonly used for cattle and swine manure. Limited cropland is available for spreading manure.	Animal category: Breeding Swine				27	kg CH4/head/yr	Equation 10.22 in Volume 4 of the 2006 IPCC Guidelines for National Greenhouse Gas Inventories	Sheet 1 of 1, Category Code 3A2, Page A1.7 of Volume 4 of the 2006 IPCC Guidelines	See Annex 10A.2, Tables 10A-4 to 10A-8, Volume 4 of 2006 Guidelines, for derivation of these emission factors	2006 IPCC Guidelines for National Greenhouse Gas Inventories, Volume 4, Table 10.14 - Manure management methane emission factors by temperature for Cattle, Swine, and Buffalo, on page 10.38	IPCC	27	3.08219	Component	AFOLU
416088	4B - Manure Management	3.A.2 - Manure Management	METHANE	2006 IPCC default	Manure management methane emission factors by temperature for Breeding Swine	Liquid/slurry and pit storage systems are commonly used for cattle and swine manure. Limited cropland is available for spreading manure.	Animal category: Breeding Swine				29	kg CH4/head/yr	Equation 10.22 in Volume 4 of the 2006 IPCC Guidelines for National Greenhouse Gas Inventories	Sheet 1 of 1, Category Code 3A2, Page A1.7 of Volume 4 of the 2006 IPCC Guidelines	See Annex 10A.2, Tables 10A-4 to 10A-8, Volume 4 of 2006 Guidelines, for derivation of these emission factors	2006 IPCC Guidelines for National Greenhouse Gas Inventories, Volume 4, Table 10.14 - Manure management methane emission factors by temperature for Cattle, Swine, and Buffalo, on page 10.38	IPCC	29	3.3105	Component	AFOLU
416089	4B - Manure Management	3.A.2 - Manure Management	METHANE	2006 IPCC default	Manure management methane emission factors by temperature for Breeding Swine	Liquid/slurry and pit storage systems are commonly used for cattle and swine manure. Limited cropland is available for spreading manure.	Animal category: Breeding Swine				32	kg CH4/head/yr	Equation 10.22 in Volume 4 of the 2006 IPCC Guidelines for National Greenhouse Gas Inventories	Sheet 1 of 1, Category Code 3A2, Page A1.7 of Volume 4 of the 2006 IPCC Guidelines	See Annex 10A.2, Tables 10A-4 to 10A-8, Volume 4 of 2006 Guidelines, for derivation of these emission factors	2006 IPCC Guidelines for National Greenhouse Gas Inventories, Volume 4, Table 10.14 - Manure management methane emission factors by temperature for Cattle, Swine, and Buffalo, on page 10.38	IPCC	32	3.65297	Component	AFOLU
416090	4B - Manure Management	3.A.2 - Manure Management	METHANE	2006 IPCC default	Manure management methane emission factors by temperature for Breeding Swine	Liquid/slurry and pit storage systems are commonly used for cattle and swine manure. Limited cropland is available for spreading manure.	Animal category: Breeding Swine				33	kg CH4/head/yr	Equation 10.22 in Volume 4 of the 2006 IPCC Guidelines for National Greenhouse Gas Inventories	Sheet 1 of 1, Category Code 3A2, Page A1.7 of Volume 4 of the 2006 IPCC Guidelines	See Annex 10A.2, Tables 10A-4 to 10A-8, Volume 4 of 2006 Guidelines, for derivation of these emission factors	2006 IPCC Guidelines for National Greenhouse Gas Inventories, Volume 4, Table 10.14 - Manure management methane emission factors by temperature for Cattle, Swine, and Buffalo, on page 10.38	IPCC	33	3.76712	Component	AFOLU
416091	4B - Manure Management	3.A.2 - Manure Management	METHANE	2006 IPCC default	Manure management methane emission factors by temperature for Buffalo	Liquid/slurry and pit storage systems are commonly used for cattle and swine manure. Limited cropland is available for spreading manure.	Animal category: Buffalo				4	kg CH4/head/yr	Equation 10.22 in Volume 4 of the 2006 IPCC Guidelines for National Greenhouse Gas Inventories	Sheet 1 of 1, Category Code 3A2, Page A1.7 of Volume 4 of the 2006 IPCC Guidelines	See Annex 10A.2, Tables 10A-4 to 10A-8, Volume 4 of 2006 Guidelines, for derivation of these emission factors	2006 IPCC Guidelines for National Greenhouse Gas Inventories, Volume 4, Table 10.14 - Manure management methane emission factors by temperature for Cattle, Swine, and Buffalo, on page 10.38	IPCC	4	0.456621	Component	AFOLU
416092	4B - Manure Management	3.A.2 - Manure Management	METHANE	2006 IPCC default	Manure management methane emission factors by temperature for Buffalo	Liquid/slurry and pit storage systems are commonly used for cattle and swine manure. Limited cropland is available for spreading manure.	Animal category: Buffalo				5	kg CH4/head/yr	Equation 10.22 in Volume 4 of the 2006 IPCC Guidelines for National Greenhouse Gas Inventories	Sheet 1 of 1, Category Code 3A2, Page A1.7 of Volume 4 of the 2006 IPCC Guidelines	See Annex 10A.2, Tables 10A-4 to 10A-8, Volume 4 of 2006 Guidelines, for derivation of these emission factors	2006 IPCC Guidelines for National Greenhouse Gas Inventories, Volume 4, Table 10.14 - Manure management methane emission factors by temperature for Cattle, Swine, and Buffalo, on page 10.38	IPCC	5	0.570776	Component	AFOLU
416093	4B - Manure Management	3.A.2 - Manure Management	METHANE	2006 IPCC default	Manure management methane emission factors by temperature for Buffalo	Liquid/slurry and pit storage systems are commonly used for cattle and swine manure. Limited cropland is available for spreading manure.	Animal category: Buffalo				6	kg CH4/head/yr	Equation 10.22 in Volume 4 of the 2006 IPCC Guidelines for National Greenhouse Gas Inventories	Sheet 1 of 1, Category Code 3A2, Page A1.7 of Volume 4 of the 2006 IPCC Guidelines	See Annex 10A.2, Tables 10A-4 to 10A-8, Volume 4 of 2006 Guidelines, for derivation of these emission factors	2006 IPCC Guidelines for National Greenhouse Gas Inventories, Volume 4, Table 10.14 - Manure management methane emission factors by temperature for Cattle, Swine, and Buffalo, on page 10.38	IPCC	6	0.684932	Component	AFOLU
416094	4B - Manure Management	3.A.2 - Manure Management	METHANE	2006 IPCC default	Manure management methane emission factors by temperature for Buffalo	Liquid/slurry and pit storage systems are commonly used for cattle and swine manure. Limited cropland is available for spreading manure.	Animal category: Buffalo				7	kg CH4/head/yr	Equation 10.22 in Volume 4 of the 2006 IPCC Guidelines for National Greenhouse Gas Inventories	Sheet 1 of 1, Category Code 3A2, Page A1.7 of Volume 4 of the 2006 IPCC Guidelines	See Annex 10A.2, Tables 10A-4 to 10A-8, Volume 4 of 2006 Guidelines, for derivation of these emission factors	2006 IPCC Guidelines for National Greenhouse Gas Inventories, Volume 4, Table 10.14 - Manure management methane emission factors by temperature for Cattle, Swine, and Buffalo, on page 10.38	IPCC	7	0.799087	Component	AFOLU
416095	4B - Manure Management	3.A.2 - Manure Management	METHANE	2006 IPCC default	Manure management methane emission factors by temperature for Buffalo	Liquid/slurry and pit storage systems are commonly used for cattle and swine manure. Limited cropland is available for spreading manure.	Animal category: Buffalo				8	kg CH4/head/yr	Equation 10.22 in Volume 4 of the 2006 IPCC Guidelines for National Greenhouse Gas Inventories	Sheet 1 of 1, Category Code 3A2, Page A1.7 of Volume 4 of the 2006 IPCC Guidelines	See Annex 10A.2, Tables 10A-4 to 10A-8, Volume 4 of 2006 Guidelines, for derivation of these emission factors	2006 IPCC Guidelines for National Greenhouse Gas Inventories, Volume 4, Table 10.14 - Manure management methane emission factors by temperature for Cattle, Swine, and Buffalo, on page 10.38	IPCC	8	0.913242	Component	AFOLU
416096	4B - Manure Management	3.A.2 - Manure Management	METHANE	2006 IPCC default	Manure management methane emission factors by temperature for Buffalo	Liquid/slurry and pit storage systems are commonly used for cattle and swine manure. Limited cropland is available for spreading manure.	Animal category: Buffalo				9	kg CH4/head/yr	Equation 10.22 in Volume 4 of the 2006 IPCC Guidelines for National Greenhouse Gas Inventories	Sheet 1 of 1, Category Code 3A2, Page A1.7 of Volume 4 of the 2006 IPCC Guidelines	See Annex 10A.2, Tables 10A-4 to 10A-8, Volume 4 of 2006 Guidelines, for derivation of these emission factors	2006 IPCC Guidelines for National Greenhouse Gas Inventories, Volume 4, Table 10.14 - Manure management methane emission factors by temperature for Cattle, Swine, and Buffalo, on page 10.38	IPCC	9	1.0274	Component	AFOLU
416097	4B - Manure Management	3.A.2 - Manure Management	METHANE	2006 IPCC default	Manure management methane emission factors by temperature for Buffalo	Liquid/slurry and pit storage systems are commonly used for cattle and swine manure. Limited cropland is available for spreading manure.	Animal category: Buffalo				10	kg CH4/head/yr	Equation 10.22 in Volume 4 of the 2006 IPCC Guidelines for National Greenhouse Gas Inventories	Sheet 1 of 1, Category Code 3A2, Page A1.7 of Volume 4 of the 2006 IPCC Guidelines	See Annex 10A.2, Tables 10A-4 to 10A-8, Volume 4 of 2006 Guidelines, for derivation of these emission factors	2006 IPCC Guidelines for National Greenhouse Gas Inventories, Volume 4, Table 10.14 - Manure management methane emission factors by temperature for Cattle, Swine, and Buffalo, on page 10.38	IPCC	10	1.14155	Component	AFOLU
416098	4B - Manure Management	3.A.2 - Manure Management	METHANE	2006 IPCC default	Manure management methane emission factors by temperature for Buffalo	Liquid/slurry and pit storage systems are commonly used for cattle and swine manure. Limited cropland is available for spreading manure.	Animal category: Buffalo				11	kg CH4/head/yr	Equation 10.22 in Volume 4 of the 2006 IPCC Guidelines for National Greenhouse Gas Inventories	Sheet 1 of 1, Category Code 3A2, Page A1.7 of Volume 4 of the 2006 IPCC Guidelines	See Annex 10A.2, Tables 10A-4 to 10A-8, Volume 4 of 2006 Guidelines, for derivation of these emission factors	2006 IPCC Guidelines for National Greenhouse Gas Inventories, Volume 4, Table 10.14 - Manure management methane emission factors by temperature for Cattle, Swine, and Buffalo, on page 10.38	IPCC	11	1.25571	Component	AFOLU
416099	4B - Manure Management	3.A.2 - Manure Management	METHANE	2006 IPCC default	Manure management methane emission factors by temperature for Buffalo	Liquid/slurry and pit storage systems are commonly used for cattle and swine manure. Limited cropland is available for spreading manure.	Animal category: Buffalo				12	kg CH4/head/yr	Equation 10.22 in Volume 4 of the 2006 IPCC Guidelines for National Greenhouse Gas Inventories	Sheet 1 of 1, Category Code 3A2, Page A1.7 of Volume 4 of the 2006 IPCC Guidelines	See Annex 10A.2, Tables 10A-4 to 10A-8, Volume 4 of 2006 Guidelines, for derivation of these emission factors	2006 IPCC Guidelines for National Greenhouse Gas Inventories, Volume 4, Table 10.14 - Manure management methane emission factors by temperature for Cattle, Swine, and Buffalo, on page 10.38	IPCC	12	1.36986	Component	AFOLU
416100	4B - Manure Management	3.A.2 - Manure Management	METHANE	2006 IPCC default	Manure management methane emission factors by temperature for Buffalo	Liquid/slurry and pit storage systems are commonly used for cattle and swine manure. Limited cropland is available for spreading manure.	Animal category: Buffalo				13	kg CH4/head/yr	Equation 10.22 in Volume 4 of the 2006 IPCC Guidelines for National Greenhouse Gas Inventories	Sheet 1 of 1, Category Code 3A2, Page A1.7 of Volume 4 of the 2006 IPCC Guidelines	See Annex 10A.2, Tables 10A-4 to 10A-8, Volume 4 of 2006 Guidelines, for derivation of these emission factors	2006 IPCC Guidelines for National Greenhouse Gas Inventories, Volume 4, Table 10.14 - Manure management methane emission factors by temperature for Cattle, Swine, and Buffalo, on page 10.38	IPCC	13	1.48402	Component	AFOLU
416101	4B - Manure Management	3.A.2 - Manure Management	METHANE	2006 IPCC default	Manure management methane emission factors by temperature for Buffalo	Liquid/slurry and pit storage systems are commonly used for cattle and swine manure. Limited cropland is available for spreading manure.	Animal category: Buffalo				14	kg CH4/head/yr	Equation 10.22 in Volume 4 of the 2006 IPCC Guidelines for National Greenhouse Gas Inventories	Sheet 1 of 1, Category Code 3A2, Page A1.7 of Volume 4 of the 2006 IPCC Guidelines	See Annex 10A.2, Tables 10A-4 to 10A-8, Volume 4 of 2006 Guidelines, for derivation of these emission factors	2006 IPCC Guidelines for National Greenhouse Gas Inventories, Volume 4, Table 10.14 - Manure management methane emission factors by temperature for Cattle, Swine, and Buffalo, on page 10.38	IPCC	14	1.59817	Component	AFOLU
416102	4B - Manure Management	3.A.2 - Manure Management	METHANE	2006 IPCC default	Manure management methane emission factors by temperature for Buffalo	Liquid/slurry and pit storage systems are commonly used for cattle and swine manure. Limited cropland is available for spreading manure.	Animal category: Buffalo				15	kg CH4/head/yr	Equation 10.22 in Volume 4 of the 2006 IPCC Guidelines for National Greenhouse Gas Inventories	Sheet 1 of 1, Category Code 3A2, Page A1.7 of Volume 4 of the 2006 IPCC Guidelines	See Annex 10A.2, Tables 10A-4 to 10A-8, Volume 4 of 2006 Guidelines, for derivation of these emission factors	2006 IPCC Guidelines for National Greenhouse Gas Inventories, Volume 4, Table 10.14 - Manure management methane emission factors by temperature for Cattle, Swine, and Buffalo, on page 10.38	IPCC	15	1.71233	Component	AFOLU
416103	4B - Manure Management	3.A.2 - Manure Management	METHANE	2006 IPCC default	Manure management methane emission factors by temperature for Buffalo	Liquid/slurry and pit storage systems are commonly used for cattle and swine manure. Limited cropland is available for spreading manure.	Animal category: Buffalo				16	kg CH4/head/yr	Equation 10.22 in Volume 4 of the 2006 IPCC Guidelines for National Greenhouse Gas Inventories	Sheet 1 of 1, Category Code 3A2, Page A1.7 of Volume 4 of the 2006 IPCC Guidelines	See Annex 10A.2, Tables 10A-4 to 10A-8, Volume 4 of 2006 Guidelines, for derivation of these emission factors	2006 IPCC Guidelines for National Greenhouse Gas Inventories, Volume 4, Table 10.14 - Manure management methane emission factors by temperature for Cattle, Swine, and Buffalo, on page 10.38	IPCC	16	1.82648	Component	AFOLU
416104	4B - Manure Management	3.A.2 - Manure Management	METHANE	2006 IPCC default	Manure management methane emission factors by temperature for Buffalo	Liquid/slurry and pit storage systems are commonly used for cattle and swine manure. Limited cropland is available for spreading manure.	Animal category: Buffalo				17	kg CH4/head/yr	Equation 10.22 in Volume 4 of the 2006 IPCC Guidelines for National Greenhouse Gas Inventories	Sheet 1 of 1, Category Code 3A2, Page A1.7 of Volume 4 of the 2006 IPCC Guidelines	See Annex 10A.2, Tables 10A-4 to 10A-8, Volume 4 of 2006 Guidelines, for derivation of these emission factors	2006 IPCC Guidelines for National Greenhouse Gas Inventories, Volume 4, Table 10.14 - Manure management methane emission factors by temperature for Cattle, Swine, and Buffalo, on page 10.38	IPCC	17	1.94064	Component	AFOLU
416105	4B - Manure Management	3.A.2 - Manure Management	METHANE	2006 IPCC default	Manure management methane emission factors by temperature for Dairy Cows	Solid based systems are used for the majority of manure. About one-third of livestock manure is managed in liquid-based systems.	Animal category: Dairy Cows				11	kg CH4/head/yr	Equation 10.22 in Volume 4 of the 2006 IPCC Guidelines for National Greenhouse Gas Inventories	Sheet 1 of 1, Category Code 3A2, Page A1.7 of Volume 4 of the 2006 IPCC Guidelines	See Annex 10A.2, Tables 10A-4 to 10A-8, Volume 4 of 2006 Guidelines, for derivation of these emission factors	2006 IPCC Guidelines for National Greenhouse Gas Inventories, Volume 4, Table 10.14 - Manure management methane emission factors by temperature for Cattle, Swine, and Buffalo, on page 10.38	IPCC	11	1.25571	Component	AFOLU
416106	4B - Manure Management	3.A.2 - Manure Management	METHANE	2006 IPCC default	Manure management methane emission factors by temperature for Dairy Cows	Solid based systems are used for the majority of manure. About one-third of livestock manure is managed in liquid-based systems.	Animal category: Dairy Cows				12	kg CH4/head/yr	Equation 10.22 in Volume 4 of the 2006 IPCC Guidelines for National Greenhouse Gas Inventories	Sheet 1 of 1, Category Code 3A2, Page A1.7 of Volume 4 of the 2006 IPCC Guidelines	See Annex 10A.2, Tables 10A-4 to 10A-8, Volume 4 of 2006 Guidelines, for derivation of these emission factors	2006 IPCC Guidelines for National Greenhouse Gas Inventories, Volume 4, Table 10.14 - Manure management methane emission factors by temperature for Cattle, Swine, and Buffalo, on page 10.38	IPCC	12	1.36986	Component	AFOLU
416107	4B - Manure Management	3.A.2 - Manure Management	METHANE	2006 IPCC default	Manure management methane emission factors by temperature for Dairy Cows	Solid based systems are used for the majority of manure. About one-third of livestock manure is managed in liquid-based systems.	Animal category: Dairy Cows				13	kg CH4/head/yr	Equation 10.22 in Volume 4 of the 2006 IPCC Guidelines for National Greenhouse Gas Inventories	Sheet 1 of 1, Category Code 3A2, Page A1.7 of Volume 4 of the 2006 IPCC Guidelines	See Annex 10A.2, Tables 10A-4 to 10A-8, Volume 4 of 2006 Guidelines, for derivation of these emission factors	2006 IPCC Guidelines for National Greenhouse Gas Inventories, Volume 4, Table 10.14 - Manure management methane emission factors by temperature for Cattle, Swine, and Buffalo, on page 10.38	IPCC	13	1.48402	Component	AFOLU
416108	4B - Manure Management	3.A.2 - Manure Management	METHANE	2006 IPCC default	Manure management methane emission factors by temperature for Dairy Cows	Solid based systems are used for the majority of manure. About one-third of livestock manure is managed in liquid-based systems.	Animal category: Dairy Cows				14	kg CH4/head/yr	Equation 10.22 in Volume 4 of the 2006 IPCC Guidelines for National Greenhouse Gas Inventories	Sheet 1 of 1, Category Code 3A2, Page A1.7 of Volume 4 of the 2006 IPCC Guidelines	See Annex 10A.2, Tables 10A-4 to 10A-8, Volume 4 of 2006 Guidelines, for derivation of these emission factors	2006 IPCC Guidelines for National Greenhouse Gas Inventories, Volume 4, Table 10.14 - Manure management methane emission factors by temperature for Cattle, Swine, and Buffalo, on page 10.38	IPCC	14	1.59817	Component	AFOLU
416109	4B - Manure Management	3.A.2 - Manure Management	METHANE	2006 IPCC default	Manure management methane emission factors by temperature for Dairy Cows	Solid based systems are used for the majority of manure. About one-third of livestock manure is managed in liquid-based systems.	Animal category: Dairy Cows				15	kg CH4/head/yr	Equation 10.22 in Volume 4 of the 2006 IPCC Guidelines for National Greenhouse Gas Inventories	Sheet 1 of 1, Category Code 3A2, Page A1.7 of Volume 4 of the 2006 IPCC Guidelines	See Annex 10A.2, Tables 10A-4 to 10A-8, Volume 4 of 2006 Guidelines, for derivation of these emission factors	2006 IPCC Guidelines for National Greenhouse Gas Inventories, Volume 4, Table 10.14 - Manure management methane emission factors by temperature for Cattle, Swine, and Buffalo, on page 10.38	IPCC	15	1.71233	Component	AFOLU
416110	4B - Manure Management	3.A.2 - Manure Management	METHANE	2006 IPCC default	Manure management methane emission factors by temperature for Dairy Cows	Solid based systems are used for the majority of manure. About one-third of livestock manure is managed in liquid-based systems.	Animal category: Dairy Cows				20	kg CH4/head/yr	Equation 10.22 in Volume 4 of the 2006 IPCC Guidelines for National Greenhouse Gas Inventories	Sheet 1 of 1, Category Code 3A2, Page A1.7 of Volume 4 of the 2006 IPCC Guidelines	See Annex 10A.2, Tables 10A-4 to 10A-8, Volume 4 of 2006 Guidelines, for derivation of these emission factors	2006 IPCC Guidelines for National Greenhouse Gas Inventories, Volume 4, Table 10.14 - Manure management methane emission factors by temperature for Cattle, Swine, and Buffalo, on page 10.38	IPCC	20	2.28311	Component	AFOLU
416111	4B - Manure Management	3.A.2 - Manure Management	METHANE	2006 IPCC default	Manure management methane emission factors by temperature for Dairy Cows	Solid based systems are used for the majority of manure. About one-third of livestock manure is managed in liquid-based systems.	Animal category: Dairy Cows				21	kg CH4/head/yr	Equation 10.22 in Volume 4 of the 2006 IPCC Guidelines for National Greenhouse Gas Inventories	Sheet 1 of 1, Category Code 3A2, Page A1.7 of Volume 4 of the 2006 IPCC Guidelines	See Annex 10A.2, Tables 10A-4 to 10A-8, Volume 4 of 2006 Guidelines, for derivation of these emission factors	2006 IPCC Guidelines for National Greenhouse Gas Inventories, Volume 4, Table 10.14 - Manure management methane emission factors by temperature for Cattle, Swine, and Buffalo, on page 10.38	IPCC	21	2.39726	Component	AFOLU
416112	4B - Manure Management	3.A.2 - Manure Management	METHANE	2006 IPCC default	Manure management methane emission factors by temperature for Dairy Cows	Solid based systems are used for the majority of manure. About one-third of livestock manure is managed in liquid-based systems.	Animal category: Dairy Cows				22	kg CH4/head/yr	Equation 10.22 in Volume 4 of the 2006 IPCC Guidelines for National Greenhouse Gas Inventories	Sheet 1 of 1, Category Code 3A2, Page A1.7 of Volume 4 of the 2006 IPCC Guidelines	See Annex 10A.2, Tables 10A-4 to 10A-8, Volume 4 of 2006 Guidelines, for derivation of these emission factors	2006 IPCC Guidelines for National Greenhouse Gas Inventories, Volume 4, Table 10.14 - Manure management methane emission factors by temperature for Cattle, Swine, and Buffalo, on page 10.38	IPCC	22	2.51142	Component	AFOLU
416113	4B - Manure Management	3.A.2 - Manure Management	METHANE	2006 IPCC default	Manure management methane emission factors by temperature for Dairy Cows	Solid based systems are used for the majority of manure. About one-third of livestock manure is managed in liquid-based systems.	Animal category: Dairy Cows				23	kg CH4/head/yr	Equation 10.22 in Volume 4 of the 2006 IPCC Guidelines for National Greenhouse Gas Inventories	Sheet 1 of 1, Category Code 3A2, Page A1.7 of Volume 4 of the 2006 IPCC Guidelines	See Annex 10A.2, Tables 10A-4 to 10A-8, Volume 4 of 2006 Guidelines, for derivation of these emission factors	2006 IPCC Guidelines for National Greenhouse Gas Inventories, Volume 4, Table 10.14 - Manure management methane emission factors by temperature for Cattle, Swine, and Buffalo, on page 10.38	IPCC	23	2.62557	Component	AFOLU
416114	4B - Manure Management	3.A.2 - Manure Management	METHANE	2006 IPCC default	Manure management methane emission factors by temperature for Dairy Cows	Solid based systems are used for the majority of manure. About one-third of livestock manure is managed in liquid-based systems.	Animal category: Dairy Cows				25	kg CH4/head/yr	Equation 10.22 in Volume 4 of the 2006 IPCC Guidelines for National Greenhouse Gas Inventories	Sheet 1 of 1, Category Code 3A2, Page A1.7 of Volume 4 of the 2006 IPCC Guidelines	See Annex 10A.2, Tables 10A-4 to 10A-8, Volume 4 of 2006 Guidelines, for derivation of these emission factors	2006 IPCC Guidelines for National Greenhouse Gas Inventories, Volume 4, Table 10.14 - Manure management methane emission factors by temperature for Cattle, Swine, and Buffalo, on page 10.38	IPCC	25	2.85388	Component	AFOLU
416115	4B - Manure Management	3.A.2 - Manure Management	METHANE	2006 IPCC default	Manure management methane emission factors by temperature for Dairy Cows	Solid based systems are used for the majority of manure. About one-third of livestock manure is managed in liquid-based systems.	Animal category: Dairy Cows				27	kg CH4/head/yr	Equation 10.22 in Volume 4 of the 2006 IPCC Guidelines for National Greenhouse Gas Inventories	Sheet 1 of 1, Category Code 3A2, Page A1.7 of Volume 4 of the 2006 IPCC Guidelines	See Annex 10A.2, Tables 10A-4 to 10A-8, Volume 4 of 2006 Guidelines, for derivation of these emission factors	2006 IPCC Guidelines for National Greenhouse Gas Inventories, Volume 4, Table 10.14 - Manure management methane emission factors by temperature for Cattle, Swine, and Buffalo, on page 10.38	IPCC	27	3.08219	Component	AFOLU
416116	4B - Manure Management	3.A.2 - Manure Management	METHANE	2006 IPCC default	Manure management methane emission factors by temperature for Dairy Cows	Solid based systems are used for the majority of manure. About one-third of livestock manure is managed in liquid-based systems.	Animal category: Dairy Cows				28	kg CH4/head/yr	Equation 10.22 in Volume 4 of the 2006 IPCC Guidelines for National Greenhouse Gas Inventories	Sheet 1 of 1, Category Code 3A2, Page A1.7 of Volume 4 of the 2006 IPCC Guidelines	See Annex 10A.2, Tables 10A-4 to 10A-8, Volume 4 of 2006 Guidelines, for derivation of these emission factors	2006 IPCC Guidelines for National Greenhouse Gas Inventories, Volume 4, Table 10.14 - Manure management methane emission factors by temperature for Cattle, Swine, and Buffalo, on page 10.38	IPCC	28	3.19635	Component	AFOLU
416117	4B - Manure Management	3.A.2 - Manure Management	METHANE	2006 IPCC default	Manure management methane emission factors by temperature for Dairy Cows	Solid based systems are used for the majority of manure. About one-third of livestock manure is managed in liquid-based systems.	Animal category: Dairy Cows				30	kg CH4/head/yr	Equation 10.22 in Volume 4 of the 2006 IPCC Guidelines for National Greenhouse Gas Inventories	Sheet 1 of 1, Category Code 3A2, Page A1.7 of Volume 4 of the 2006 IPCC Guidelines	See Annex 10A.2, Tables 10A-4 to 10A-8, Volume 4 of 2006 Guidelines, for derivation of these emission factors	2006 IPCC Guidelines for National Greenhouse Gas Inventories, Volume 4, Table 10.14 - Manure management methane emission factors by temperature for Cattle, Swine, and Buffalo, on page 10.38	IPCC	30	3.42466	Component	AFOLU
416118	4B - Manure Management	3.A.2 - Manure Management	METHANE	2006 IPCC default	Manure management methane emission factors by temperature for Dairy Cows	Solid based systems are used for the majority of manure. About one-third of livestock manure is managed in liquid-based systems.	Animal category: Dairy Cows				33	kg CH4/head/yr	Equation 10.22 in Volume 4 of the 2006 IPCC Guidelines for National Greenhouse Gas Inventories	Sheet 1 of 1, Category Code 3A2, Page A1.7 of Volume 4 of the 2006 IPCC Guidelines	See Annex 10A.2, Tables 10A-4 to 10A-8, Volume 4 of 2006 Guidelines, for derivation of these emission factors	2006 IPCC Guidelines for National Greenhouse Gas Inventories, Volume 4, Table 10.14 - Manure management methane emission factors by temperature for Cattle, Swine, and Buffalo, on page 10.38	IPCC	33	3.76712	Component	AFOLU
416119	4B - Manure Management	3.A.2 - Manure Management	METHANE	2006 IPCC default	Manure management methane emission factors by temperature for Dairy Cows	Solid based systems are used for the majority of manure. About one-third of livestock manure is managed in liquid-based systems.	Animal category: Dairy Cows				35	kg CH4/head/yr	Equation 10.22 in Volume 4 of the 2006 IPCC Guidelines for National Greenhouse Gas Inventories	Sheet 1 of 1, Category Code 3A2, Page A1.7 of Volume 4 of the 2006 IPCC Guidelines	See Annex 10A.2, Tables 10A-4 to 10A-8, Volume 4 of 2006 Guidelines, for derivation of these emission factors	2006 IPCC Guidelines for National Greenhouse Gas Inventories, Volume 4, Table 10.14 - Manure management methane emission factors by temperature for Cattle, Swine, and Buffalo, on page 10.38	IPCC	35	3.99543	Component	AFOLU
416120	4B - Manure Management	3.A.2 - Manure Management	METHANE	2006 IPCC default	Manure management methane emission factors by temperature for Dairy Cows	Solid based systems are used for the majority of manure. About one-third of livestock manure is managed in liquid-based systems.	Animal category: Dairy Cows				37	kg CH4/head/yr	Equation 10.22 in Volume 4 of the 2006 IPCC Guidelines for National Greenhouse Gas Inventories	Sheet 1 of 1, Category Code 3A2, Page A1.7 of Volume 4 of the 2006 IPCC Guidelines	See Annex 10A.2, Tables 10A-4 to 10A-8, Volume 4 of 2006 Guidelines, for derivation of these emission factors	2006 IPCC Guidelines for National Greenhouse Gas Inventories, Volume 4, Table 10.14 - Manure management methane emission factors by temperature for Cattle, Swine, and Buffalo, on page 10.38	IPCC	37	4.22374	Component	AFOLU
416121	4B - Manure Management	3.A.2 - Manure Management	METHANE	2006 IPCC default	Manure management methane emission factors by temperature for Dairy Cows	Solid based systems are used for the majority of manure. About one-third of livestock manure is managed in liquid-based systems.	Animal category: Dairy Cows				42	kg CH4/head/yr	Equation 10.22 in Volume 4 of the 2006 IPCC Guidelines for National Greenhouse Gas Inventories	Sheet 1 of 1, Category Code 3A2, Page A1.7 of Volume 4 of the 2006 IPCC Guidelines	See Annex 10A.2, Tables 10A-4 to 10A-8, Volume 4 of 2006 Guidelines, for derivation of these emission factors	2006 IPCC Guidelines for National Greenhouse Gas Inventories, Volume 4, Table 10.14 - Manure management methane emission factors by temperature for Cattle, Swine, and Buffalo, on page 10.38	IPCC	42	4.79452	Component	AFOLU
416122	4B - Manure Management	3.A.2 - Manure Management	METHANE	2006 IPCC default	Manure management methane emission factors by temperature for Dairy Cows	Solid based systems are used for the majority of manure. About one-third of livestock manure is managed in liquid-based systems.	Animal category: Dairy Cows				45	kg CH4/head/yr	Equation 10.22 in Volume 4 of the 2006 IPCC Guidelines for National Greenhouse Gas Inventories	Sheet 1 of 1, Category Code 3A2, Page A1.7 of Volume 4 of the 2006 IPCC Guidelines	See Annex 10A.2, Tables 10A-4 to 10A-8, Volume 4 of 2006 Guidelines, for derivation of these emission factors	2006 IPCC Guidelines for National Greenhouse Gas Inventories, Volume 4, Table 10.14 - Manure management methane emission factors by temperature for Cattle, Swine, and Buffalo, on page 10.38	IPCC	45	5.13699	Component	AFOLU
416123	4B - Manure Management	3.A.2 - Manure Management	METHANE	2006 IPCC default	Manure management methane emission factors by temperature for Dairy Cows	Solid based systems are used for the majority of manure. About one-third of livestock manure is managed in liquid-based systems.	Animal category: Dairy Cows				46	kg CH4/head/yr	Equation 10.22 in Volume 4 of the 2006 IPCC Guidelines for National Greenhouse Gas Inventories	Sheet 1 of 1, Category Code 3A2, Page A1.7 of Volume 4 of the 2006 IPCC Guidelines	See Annex 10A.2, Tables 10A-4 to 10A-8, Volume 4 of 2006 Guidelines, for derivation of these emission factors	2006 IPCC Guidelines for National Greenhouse Gas Inventories, Volume 4, Table 10.14 - Manure management methane emission factors by temperature for Cattle, Swine, and Buffalo, on page 10.38	IPCC	46	5.25114	Component	AFOLU
416124	4B - Manure Management	3.A.2 - Manure Management	METHANE	2006 IPCC default	Manure management methane emission factors by temperature for Other Cattle	Solid based systems are used for the majority of manure. About one-third of livestock manure is managed in liquid-based systems.	Animal category: Other Cattle				6	kg CH4/head/yr	Equation 10.22 in Volume 4 of the 2006 IPCC Guidelines for National Greenhouse Gas Inventories	Sheet 1 of 1, Category Code 3A2, Page A1.7 of Volume 4 of the 2006 IPCC Guidelines	See Annex 10A.2, Tables 10A-4 to 10A-8, Volume 4 of 2006 Guidelines, for derivation of these emission factors	2006 IPCC Guidelines for National Greenhouse Gas Inventories, Volume 4, Table 10.14 - Manure management methane emission factors by temperature for Cattle, Swine, and Buffalo, on page 10.38	IPCC	6	0.684932	Component	AFOLU
416125	4B - Manure Management	3.A.2 - Manure Management	METHANE	2006 IPCC default	Manure management methane emission factors by temperature for Other Cattle	Solid based systems are used for the majority of manure. About one-third of livestock manure is managed in liquid-based systems.	Animal category: Other Cattle				7	kg CH4/head/yr	Equation 10.22 in Volume 4 of the 2006 IPCC Guidelines for National Greenhouse Gas Inventories	Sheet 1 of 1, Category Code 3A2, Page A1.7 of Volume 4 of the 2006 IPCC Guidelines	See Annex 10A.2, Tables 10A-4 to 10A-8, Volume 4 of 2006 Guidelines, for derivation of these emission factors	2006 IPCC Guidelines for National Greenhouse Gas Inventories, Volume 4, Table 10.14 - Manure management methane emission factors by temperature for Cattle, Swine, and Buffalo, on page 10.38	IPCC	7	0.799087	Component	AFOLU
416126	4B - Manure Management	3.A.2 - Manure Management	METHANE	2006 IPCC default	Manure management methane emission factors by temperature for Other Cattle	Solid based systems are used for the majority of manure. About one-third of livestock manure is managed in liquid-based systems.	Animal category: Other Cattle				8	kg CH4/head/yr	Equation 10.22 in Volume 4 of the 2006 IPCC Guidelines for National Greenhouse Gas Inventories	Sheet 1 of 1, Category Code 3A2, Page A1.7 of Volume 4 of the 2006 IPCC Guidelines	See Annex 10A.2, Tables 10A-4 to 10A-8, Volume 4 of 2006 Guidelines, for derivation of these emission factors	2006 IPCC Guidelines for National Greenhouse Gas Inventories, Volume 4, Table 10.14 - Manure management methane emission factors by temperature for Cattle, Swine, and Buffalo, on page 10.38	IPCC	8	0.913242	Component	AFOLU
416127	4B - Manure Management	3.A.2 - Manure Management	METHANE	2006 IPCC default	Manure management methane emission factors by temperature for Other Cattle	Solid based systems are used for the majority of manure. About one-third of livestock manure is managed in liquid-based systems.	Animal category: Other Cattle				9	kg CH4/head/yr	Equation 10.22 in Volume 4 of the 2006 IPCC Guidelines for National Greenhouse Gas Inventories	Sheet 1 of 1, Category Code 3A2, Page A1.7 of Volume 4 of the 2006 IPCC Guidelines	See Annex 10A.2, Tables 10A-4 to 10A-8, Volume 4 of 2006 Guidelines, for derivation of these emission factors	2006 IPCC Guidelines for National Greenhouse Gas Inventories, Volume 4, Table 10.14 - Manure management methane emission factors by temperature for Cattle, Swine, and Buffalo, on page 10.38	IPCC	9	1.0274	Component	AFOLU
416128	4B - Manure Management	3.A.2 - Manure Management	METHANE	2006 IPCC default	Manure management methane emission factors by temperature for Other Cattle	Solid based systems are used for the majority of manure. About one-third of livestock manure is managed in liquid-based systems.	Animal category: Other Cattle				10	kg CH4/head/yr	Equation 10.22 in Volume 4 of the 2006 IPCC Guidelines for National Greenhouse Gas Inventories	Sheet 1 of 1, Category Code 3A2, Page A1.7 of Volume 4 of the 2006 IPCC Guidelines	See Annex 10A.2, Tables 10A-4 to 10A-8, Volume 4 of 2006 Guidelines, for derivation of these emission factors	2006 IPCC Guidelines for National Greenhouse Gas Inventories, Volume 4, Table 10.14 - Manure management methane emission factors by temperature for Cattle, Swine, and Buffalo, on page 10.38	IPCC	10	1.14155	Component	AFOLU
416129	4B - Manure Management	3.A.2 - Manure Management	METHANE	2006 IPCC default	Manure management methane emission factors by temperature for Other Cattle	Solid based systems are used for the majority of manure. About one-third of livestock manure is managed in liquid-based systems.	Animal category: Other Cattle				11	kg CH4/head/yr	Equation 10.22 in Volume 4 of the 2006 IPCC Guidelines for National Greenhouse Gas Inventories	Sheet 1 of 1, Category Code 3A2, Page A1.7 of Volume 4 of the 2006 IPCC Guidelines	See Annex 10A.2, Tables 10A-4 to 10A-8, Volume 4 of 2006 Guidelines, for derivation of these emission factors	2006 IPCC Guidelines for National Greenhouse Gas Inventories, Volume 4, Table 10.14 - Manure management methane emission factors by temperature for Cattle, Swine, and Buffalo, on page 10.38	IPCC	11	1.25571	Component	AFOLU
416130	4B - Manure Management	3.A.2 - Manure Management	METHANE	2006 IPCC default	Manure management methane emission factors by temperature for Other Cattle	Solid based systems are used for the majority of manure. About one-third of livestock manure is managed in liquid-based systems.	Animal category: Other Cattle				12	kg CH4/head/yr	Equation 10.22 in Volume 4 of the 2006 IPCC Guidelines for National Greenhouse Gas Inventories	Sheet 1 of 1, Category Code 3A2, Page A1.7 of Volume 4 of the 2006 IPCC Guidelines	See Annex 10A.2, Tables 10A-4 to 10A-8, Volume 4 of 2006 Guidelines, for derivation of these emission factors	2006 IPCC Guidelines for National Greenhouse Gas Inventories, Volume 4, Table 10.14 - Manure management methane emission factors by temperature for Cattle, Swine, and Buffalo, on page 10.38	IPCC	12	1.36986	Component	AFOLU
416131	4B - Manure Management	3.A.2 - Manure Management	METHANE	2006 IPCC default	Manure management methane emission factors by temperature for Other Cattle	Solid based systems are used for the majority of manure. About one-third of livestock manure is managed in liquid-based systems.	Animal category: Other Cattle				13	kg CH4/head/yr	Equation 10.22 in Volume 4 of the 2006 IPCC Guidelines for National Greenhouse Gas Inventories	Sheet 1 of 1, Category Code 3A2, Page A1.7 of Volume 4 of the 2006 IPCC Guidelines	See Annex 10A.2, Tables 10A-4 to 10A-8, Volume 4 of 2006 Guidelines, for derivation of these emission factors	2006 IPCC Guidelines for National Greenhouse Gas Inventories, Volume 4, Table 10.14 - Manure management methane emission factors by temperature for Cattle, Swine, and Buffalo, on page 10.38	IPCC	13	1.48402	Component	AFOLU
416132	4B - Manure Management	3.A.2 - Manure Management	METHANE	2006 IPCC default	Manure management methane emission factors by temperature for Other Cattle	Solid based systems are used for the majority of manure. About one-third of livestock manure is managed in liquid-based systems.	Animal category: Other Cattle				14	kg CH4/head/yr	Equation 10.22 in Volume 4 of the 2006 IPCC Guidelines for National Greenhouse Gas Inventories	Sheet 1 of 1, Category Code 3A2, Page A1.7 of Volume 4 of the 2006 IPCC Guidelines	See Annex 10A.2, Tables 10A-4 to 10A-8, Volume 4 of 2006 Guidelines, for derivation of these emission factors	2006 IPCC Guidelines for National Greenhouse Gas Inventories, Volume 4, Table 10.14 - Manure management methane emission factors by temperature for Cattle, Swine, and Buffalo, on page 10.38	IPCC	14	1.59817	Component	AFOLU
416133	4B - Manure Management	3.A.2 - Manure Management	METHANE	2006 IPCC default	Manure management methane emission factors by temperature for Other Cattle	Solid based systems are used for the majority of manure. About one-third of livestock manure is managed in liquid-based systems.	Animal category: Other Cattle				15	kg CH4/head/yr	Equation 10.22 in Volume 4 of the 2006 IPCC Guidelines for National Greenhouse Gas Inventories	Sheet 1 of 1, Category Code 3A2, Page A1.7 of Volume 4 of the 2006 IPCC Guidelines	See Annex 10A.2, Tables 10A-4 to 10A-8, Volume 4 of 2006 Guidelines, for derivation of these emission factors	2006 IPCC Guidelines for National Greenhouse Gas Inventories, Volume 4, Table 10.14 - Manure management methane emission factors by temperature for Cattle, Swine, and Buffalo, on page 10.38	IPCC	15	1.71233	Component	AFOLU
416134	4B - Manure Management	3.A.2 - Manure Management	METHANE	2006 IPCC default	Manure management methane emission factors by temperature for Other Cattle	Solid based systems are used for the majority of manure. About one-third of livestock manure is managed in liquid-based systems.	Animal category: Other Cattle				16	kg CH4/head/yr	Equation 10.22 in Volume 4 of the 2006 IPCC Guidelines for National Greenhouse Gas Inventories	Sheet 1 of 1, Category Code 3A2, Page A1.7 of Volume 4 of the 2006 IPCC Guidelines	See Annex 10A.2, Tables 10A-4 to 10A-8, Volume 4 of 2006 Guidelines, for derivation of these emission factors	2006 IPCC Guidelines for National Greenhouse Gas Inventories, Volume 4, Table 10.14 - Manure management methane emission factors by temperature for Cattle, Swine, and Buffalo, on page 10.38	IPCC	16	1.82648	Component	AFOLU
416135	4B - Manure Management	3.A.2 - Manure Management	METHANE	2006 IPCC default	Manure management methane emission factors by temperature for Other Cattle	Solid based systems are used for the majority of manure. About one-third of livestock manure is managed in liquid-based systems.	Animal category: Other Cattle				18	kg CH4/head/yr	Equation 10.22 in Volume 4 of the 2006 IPCC Guidelines for National Greenhouse Gas Inventories	Sheet 1 of 1, Category Code 3A2, Page A1.7 of Volume 4 of the 2006 IPCC Guidelines	See Annex 10A.2, Tables 10A-4 to 10A-8, Volume 4 of 2006 Guidelines, for derivation of these emission factors	2006 IPCC Guidelines for National Greenhouse Gas Inventories, Volume 4, Table 10.14 - Manure management methane emission factors by temperature for Cattle, Swine, and Buffalo, on page 10.38	IPCC	18	2.05479	Component	AFOLU
416136	4B - Manure Management	3.A.2 - Manure Management	METHANE	2006 IPCC default	Manure management methane emission factors by temperature for Other Cattle	Solid based systems are used for the majority of manure. About one-third of livestock manure is managed in liquid-based systems.	Animal category: Other Cattle				19	kg CH4/head/yr	Equation 10.22 in Volume 4 of the 2006 IPCC Guidelines for National Greenhouse Gas Inventories	Sheet 1 of 1, Category Code 3A2, Page A1.7 of Volume 4 of the 2006 IPCC Guidelines	See Annex 10A.2, Tables 10A-4 to 10A-8, Volume 4 of 2006 Guidelines, for derivation of these emission factors	2006 IPCC Guidelines for National Greenhouse Gas Inventories, Volume 4, Table 10.14 - Manure management methane emission factors by temperature for Cattle, Swine, and Buffalo, on page 10.38	IPCC	19	2.16895	Component	AFOLU
416137	4B - Manure Management	3.A.2 - Manure Management	METHANE	2006 IPCC default	Manure management methane emission factors by temperature for Other Cattle	Solid based systems are used for the majority of manure. About one-third of livestock manure is managed in liquid-based systems.	Animal category: Other Cattle				21	kg CH4/head/yr	Equation 10.22 in Volume 4 of the 2006 IPCC Guidelines for National Greenhouse Gas Inventories	Sheet 1 of 1, Category Code 3A2, Page A1.7 of Volume 4 of the 2006 IPCC Guidelines	See Annex 10A.2, Tables 10A-4 to 10A-8, Volume 4 of 2006 Guidelines, for derivation of these emission factors	2006 IPCC Guidelines for National Greenhouse Gas Inventories, Volume 4, Table 10.14 - Manure management methane emission factors by temperature for Cattle, Swine, and Buffalo, on page 10.38	IPCC	21	2.39726	Component	AFOLU
416138	4B - Manure Management	3.A.2 - Manure Management	METHANE	2006 IPCC default	Manure management methane emission factors by temperature for Other Cattle	Solid based systems are used for the majority of manure. About one-third of livestock manure is managed in liquid-based systems.	Animal category: Other Cattle				23	kg CH4/head/yr	Equation 10.22 in Volume 4 of the 2006 IPCC Guidelines for National Greenhouse Gas Inventories	Sheet 1 of 1, Category Code 3A2, Page A1.7 of Volume 4 of the 2006 IPCC Guidelines	See Annex 10A.2, Tables 10A-4 to 10A-8, Volume 4 of 2006 Guidelines, for derivation of these emission factors	2006 IPCC Guidelines for National Greenhouse Gas Inventories, Volume 4, Table 10.14 - Manure management methane emission factors by temperature for Cattle, Swine, and Buffalo, on page 10.38	IPCC	23	2.62557	Component	AFOLU
416139	4B - Manure Management	3.A.2 - Manure Management	METHANE	2006 IPCC default	Manure management methane emission factors by temperature for Market Swine	Solid based systems are used for the majority of manure. About one-third of livestock manure is managed in liquid-based systems.	Animal category: Market Swine				3	kg CH4/head/yr	Equation 10.22 in Volume 4 of the 2006 IPCC Guidelines for National Greenhouse Gas Inventories	Sheet 1 of 1, Category Code 3A2, Page A1.7 of Volume 4 of the 2006 IPCC Guidelines	See Annex 10A.2, Tables 10A-4 to 10A-8, Volume 4 of 2006 Guidelines, for derivation of these emission factors	2006 IPCC Guidelines for National Greenhouse Gas Inventories, Volume 4, Table 10.14 - Manure management methane emission factors by temperature for Cattle, Swine, and Buffalo, on page 10.38	IPCC	3	0.342466	Component	AFOLU
416140	4B - Manure Management	3.A.2 - Manure Management	METHANE	2006 IPCC default	Manure management methane emission factors by temperature for Market Swine	Solid based systems are used for the majority of manure. About one-third of livestock manure is managed in liquid-based systems.	Animal category: Market Swine				4	kg CH4/head/yr	Equation 10.22 in Volume 4 of the 2006 IPCC Guidelines for National Greenhouse Gas Inventories	Sheet 1 of 1, Category Code 3A2, Page A1.7 of Volume 4 of the 2006 IPCC Guidelines	See Annex 10A.2, Tables 10A-4 to 10A-8, Volume 4 of 2006 Guidelines, for derivation of these emission factors	2006 IPCC Guidelines for National Greenhouse Gas Inventories, Volume 4, Table 10.14 - Manure management methane emission factors by temperature for Cattle, Swine, and Buffalo, on page 10.38	IPCC	4	0.456621	Component	AFOLU
416141	4B - Manure Management	3.A.2 - Manure Management	METHANE	2006 IPCC default	Manure management methane emission factors by temperature for Market Swine	Solid based systems are used for the majority of manure. About one-third of livestock manure is managed in liquid-based systems.	Animal category: Market Swine				5	kg CH4/head/yr	Equation 10.22 in Volume 4 of the 2006 IPCC Guidelines for National Greenhouse Gas Inventories	Sheet 1 of 1, Category Code 3A2, Page A1.7 of Volume 4 of the 2006 IPCC Guidelines	See Annex 10A.2, Tables 10A-4 to 10A-8, Volume 4 of 2006 Guidelines, for derivation of these emission factors	2006 IPCC Guidelines for National Greenhouse Gas Inventories, Volume 4, Table 10.14 - Manure management methane emission factors by temperature for Cattle, Swine, and Buffalo, on page 10.38	IPCC	5	0.570776	Component	AFOLU
416142	4B - Manure Management	3.A.2 - Manure Management	METHANE	2006 IPCC default	Manure management methane emission factors by temperature for Market Swine	Solid based systems are used for the majority of manure. About one-third of livestock manure is managed in liquid-based systems.	Animal category: Market Swine				6	kg CH4/head/yr	Equation 10.22 in Volume 4 of the 2006 IPCC Guidelines for National Greenhouse Gas Inventories	Sheet 1 of 1, Category Code 3A2, Page A1.7 of Volume 4 of the 2006 IPCC Guidelines	See Annex 10A.2, Tables 10A-4 to 10A-8, Volume 4 of 2006 Guidelines, for derivation of these emission factors	2006 IPCC Guidelines for National Greenhouse Gas Inventories, Volume 4, Table 10.14 - Manure management methane emission factors by temperature for Cattle, Swine, and Buffalo, on page 10.38	IPCC	6	0.684932	Component	AFOLU
416143	4B - Manure Management	3.A.2 - Manure Management	METHANE	2006 IPCC default	Manure management methane emission factors by temperature for Market Swine	Solid based systems are used for the majority of manure. About one-third of livestock manure is managed in liquid-based systems.	Animal category: Market Swine				7	kg CH4/head/yr	Equation 10.22 in Volume 4 of the 2006 IPCC Guidelines for National Greenhouse Gas Inventories	Sheet 1 of 1, Category Code 3A2, Page A1.7 of Volume 4 of the 2006 IPCC Guidelines	See Annex 10A.2, Tables 10A-4 to 10A-8, Volume 4 of 2006 Guidelines, for derivation of these emission factors	2006 IPCC Guidelines for National Greenhouse Gas Inventories, Volume 4, Table 10.14 - Manure management methane emission factors by temperature for Cattle, Swine, and Buffalo, on page 10.38	IPCC	7	0.799087	Component	AFOLU
416144	4B - Manure Management	3.A.2 - Manure Management	METHANE	2006 IPCC default	Manure management methane emission factors by temperature for Market Swine	Solid based systems are used for the majority of manure. About one-third of livestock manure is managed in liquid-based systems.	Animal category: Market Swine				10	kg CH4/head/yr	Equation 10.22 in Volume 4 of the 2006 IPCC Guidelines for National Greenhouse Gas Inventories	Sheet 1 of 1, Category Code 3A2, Page A1.7 of Volume 4 of the 2006 IPCC Guidelines	See Annex 10A.2, Tables 10A-4 to 10A-8, Volume 4 of 2006 Guidelines, for derivation of these emission factors	2006 IPCC Guidelines for National Greenhouse Gas Inventories, Volume 4, Table 10.14 - Manure management methane emission factors by temperature for Cattle, Swine, and Buffalo, on page 10.38	IPCC	10	1.14155	Component	AFOLU
416145	4B - Manure Management	3.A.2 - Manure Management	METHANE	2006 IPCC default	Manure management methane emission factors by temperature for Breeding Swine	Solid based systems are used for the majority of manure. About one-third of livestock manure is managed in liquid-based systems.	Animal category: Breeding Swine				4	kg CH4/head/yr	Equation 10.22 in Volume 4 of the 2006 IPCC Guidelines for National Greenhouse Gas Inventories	Sheet 1 of 1, Category Code 3A2, Page A1.7 of Volume 4 of the 2006 IPCC Guidelines	See Annex 10A.2, Tables 10A-4 to 10A-8, Volume 4 of 2006 Guidelines, for derivation of these emission factors	2006 IPCC Guidelines for National Greenhouse Gas Inventories, Volume 4, Table 10.14 - Manure management methane emission factors by temperature for Cattle, Swine, and Buffalo, on page 10.38	IPCC	4	0.456621	Component	AFOLU
416146	4B - Manure Management	3.A.2 - Manure Management	METHANE	2006 IPCC default	Manure management methane emission factors by temperature for Breeding Swine	Solid based systems are used for the majority of manure. About one-third of livestock manure is managed in liquid-based systems.	Animal category: Breeding Swine				5	kg CH4/head/yr	Equation 10.22 in Volume 4 of the 2006 IPCC Guidelines for National Greenhouse Gas Inventories	Sheet 1 of 1, Category Code 3A2, Page A1.7 of Volume 4 of the 2006 IPCC Guidelines	See Annex 10A.2, Tables 10A-4 to 10A-8, Volume 4 of 2006 Guidelines, for derivation of these emission factors	2006 IPCC Guidelines for National Greenhouse Gas Inventories, Volume 4, Table 10.14 - Manure management methane emission factors by temperature for Cattle, Swine, and Buffalo, on page 10.38	IPCC	5	0.570776	Component	AFOLU
416147	4B - Manure Management	3.A.2 - Manure Management	METHANE	2006 IPCC default	Manure management methane emission factors by temperature for Breeding Swine	Solid based systems are used for the majority of manure. About one-third of livestock manure is managed in liquid-based systems.	Animal category: Breeding Swine				6	kg CH4/head/yr	Equation 10.22 in Volume 4 of the 2006 IPCC Guidelines for National Greenhouse Gas Inventories	Sheet 1 of 1, Category Code 3A2, Page A1.7 of Volume 4 of the 2006 IPCC Guidelines	See Annex 10A.2, Tables 10A-4 to 10A-8, Volume 4 of 2006 Guidelines, for derivation of these emission factors	2006 IPCC Guidelines for National Greenhouse Gas Inventories, Volume 4, Table 10.14 - Manure management methane emission factors by temperature for Cattle, Swine, and Buffalo, on page 10.38	IPCC	6	0.684932	Component	AFOLU
416148	4B - Manure Management	3.A.2 - Manure Management	METHANE	2006 IPCC default	Manure management methane emission factors by temperature for Breeding Swine	Solid based systems are used for the majority of manure. About one-third of livestock manure is managed in liquid-based systems.	Animal category: Breeding Swine				7	kg CH4/head/yr	Equation 10.22 in Volume 4 of the 2006 IPCC Guidelines for National Greenhouse Gas Inventories	Sheet 1 of 1, Category Code 3A2, Page A1.7 of Volume 4 of the 2006 IPCC Guidelines	See Annex 10A.2, Tables 10A-4 to 10A-8, Volume 4 of 2006 Guidelines, for derivation of these emission factors	2006 IPCC Guidelines for National Greenhouse Gas Inventories, Volume 4, Table 10.14 - Manure management methane emission factors by temperature for Cattle, Swine, and Buffalo, on page 10.38	IPCC	7	0.799087	Component	AFOLU
416149	4B - Manure Management	3.A.2 - Manure Management	METHANE	2006 IPCC default	Manure management methane emission factors by temperature for Breeding Swine	Solid based systems are used for the majority of manure. About one-third of livestock manure is managed in liquid-based systems.	Animal category: Breeding Swine				8	kg CH4/head/yr	Equation 10.22 in Volume 4 of the 2006 IPCC Guidelines for National Greenhouse Gas Inventories	Sheet 1 of 1, Category Code 3A2, Page A1.7 of Volume 4 of the 2006 IPCC Guidelines	See Annex 10A.2, Tables 10A-4 to 10A-8, Volume 4 of 2006 Guidelines, for derivation of these emission factors	2006 IPCC Guidelines for National Greenhouse Gas Inventories, Volume 4, Table 10.14 - Manure management methane emission factors by temperature for Cattle, Swine, and Buffalo, on page 10.38	IPCC	8	0.913242	Component	AFOLU
416150	4B - Manure Management	3.A.2 - Manure Management	METHANE	2006 IPCC default	Manure management methane emission factors by temperature for Breeding Swine	Solid based systems are used for the majority of manure. About one-third of livestock manure is managed in liquid-based systems.	Animal category: Breeding Swine				9	kg CH4/head/yr	Equation 10.22 in Volume 4 of the 2006 IPCC Guidelines for National Greenhouse Gas Inventories	Sheet 1 of 1, Category Code 3A2, Page A1.7 of Volume 4 of the 2006 IPCC Guidelines	See Annex 10A.2, Tables 10A-4 to 10A-8, Volume 4 of 2006 Guidelines, for derivation of these emission factors	2006 IPCC Guidelines for National Greenhouse Gas Inventories, Volume 4, Table 10.14 - Manure management methane emission factors by temperature for Cattle, Swine, and Buffalo, on page 10.38	IPCC	9	1.0274	Component	AFOLU
416151	4B - Manure Management	3.A.2 - Manure Management	METHANE	2006 IPCC default	Manure management methane emission factors by temperature for Breeding Swine	Solid based systems are used for the majority of manure. About one-third of livestock manure is managed in liquid-based systems.	Animal category: Breeding Swine				10	kg CH4/head/yr	Equation 10.22 in Volume 4 of the 2006 IPCC Guidelines for National Greenhouse Gas Inventories	Sheet 1 of 1, Category Code 3A2, Page A1.7 of Volume 4 of the 2006 IPCC Guidelines	See Annex 10A.2, Tables 10A-4 to 10A-8, Volume 4 of 2006 Guidelines, for derivation of these emission factors	2006 IPCC Guidelines for National Greenhouse Gas Inventories, Volume 4, Table 10.14 - Manure management methane emission factors by temperature for Cattle, Swine, and Buffalo, on page 10.38	IPCC	10	1.14155	Component	AFOLU
416152	4B - Manure Management	3.A.2 - Manure Management	METHANE	2006 IPCC default	Manure management methane emission factors by temperature for Breeding Swine	Solid based systems are used for the majority of manure. About one-third of livestock manure is managed in liquid-based systems.	Animal category: Breeding Swine				11	kg CH4/head/yr	Equation 10.22 in Volume 4 of the 2006 IPCC Guidelines for National Greenhouse Gas Inventories	Sheet 1 of 1, Category Code 3A2, Page A1.7 of Volume 4 of the 2006 IPCC Guidelines	See Annex 10A.2, Tables 10A-4 to 10A-8, Volume 4 of 2006 Guidelines, for derivation of these emission factors	2006 IPCC Guidelines for National Greenhouse Gas Inventories, Volume 4, Table 10.14 - Manure management methane emission factors by temperature for Cattle, Swine, and Buffalo, on page 10.38	IPCC	11	1.25571	Component	AFOLU
416153	4B - Manure Management	3.A.2 - Manure Management	METHANE	2006 IPCC default	Manure management methane emission factors by temperature for Breeding Swine	Solid based systems are used for the majority of manure. About one-third of livestock manure is managed in liquid-based systems.	Animal category: Breeding Swine				12	kg CH4/head/yr	Equation 10.22 in Volume 4 of the 2006 IPCC Guidelines for National Greenhouse Gas Inventories	Sheet 1 of 1, Category Code 3A2, Page A1.7 of Volume 4 of the 2006 IPCC Guidelines	See Annex 10A.2, Tables 10A-4 to 10A-8, Volume 4 of 2006 Guidelines, for derivation of these emission factors	2006 IPCC Guidelines for National Greenhouse Gas Inventories, Volume 4, Table 10.14 - Manure management methane emission factors by temperature for Cattle, Swine, and Buffalo, on page 10.38	IPCC	12	1.36986	Component	AFOLU
416154	4B - Manure Management	3.A.2 - Manure Management	METHANE	2006 IPCC default	Manure management methane emission factors by temperature for Breeding Swine	Solid based systems are used for the majority of manure. About one-third of livestock manure is managed in liquid-based systems.	Animal category: Breeding Swine				16	kg CH4/head/yr	Equation 10.22 in Volume 4 of the 2006 IPCC Guidelines for National Greenhouse Gas Inventories	Sheet 1 of 1, Category Code 3A2, Page A1.7 of Volume 4 of the 2006 IPCC Guidelines	See Annex 10A.2, Tables 10A-4 to 10A-8, Volume 4 of 2006 Guidelines, for derivation of these emission factors	2006 IPCC Guidelines for National Greenhouse Gas Inventories, Volume 4, Table 10.14 - Manure management methane emission factors by temperature for Cattle, Swine, and Buffalo, on page 10.38	IPCC	16	1.82648	Component	AFOLU
416155	4B - Manure Management	3.A.2 - Manure Management	METHANE	2006 IPCC default	Manure management methane emission factors by temperature for Breeding Swine	Solid based systems are used for the majority of manure. About one-third of livestock manure is managed in liquid-based systems.	Animal category: Breeding Swine				17	kg CH4/head/yr	Equation 10.22 in Volume 4 of the 2006 IPCC Guidelines for National Greenhouse Gas Inventories	Sheet 1 of 1, Category Code 3A2, Page A1.7 of Volume 4 of the 2006 IPCC Guidelines	See Annex 10A.2, Tables 10A-4 to 10A-8, Volume 4 of 2006 Guidelines, for derivation of these emission factors	2006 IPCC Guidelines for National Greenhouse Gas Inventories, Volume 4, Table 10.14 - Manure management methane emission factors by temperature for Cattle, Swine, and Buffalo, on page 10.38	IPCC	17	1.94064	Component	AFOLU
416156	4B - Manure Management	3.A.2 - Manure Management	METHANE	2006 IPCC default	Manure management methane emission factors by temperature for Buffalo	Solid based systems are used for the majority of manure. About one-third of livestock manure is managed in liquid-based systems.	Animal category: Buffalo				5	kg CH4/head/yr	Equation 10.22 in Volume 4 of the 2006 IPCC Guidelines for National Greenhouse Gas Inventories	Sheet 1 of 1, Category Code 3A2, Page A1.7 of Volume 4 of the 2006 IPCC Guidelines	See Annex 10A.2, Tables 10A-4 to 10A-8, Volume 4 of 2006 Guidelines, for derivation of these emission factors	2006 IPCC Guidelines for National Greenhouse Gas Inventories, Volume 4, Table 10.14 - Manure management methane emission factors by temperature for Cattle, Swine, and Buffalo, on page 10.38	IPCC	5	0.570776	Component	AFOLU
416157	4B - Manure Management	3.A.2 - Manure Management	METHANE	2006 IPCC default	Manure management methane emission factors by temperature for Buffalo	Solid based systems are used for the majority of manure. About one-third of livestock manure is managed in liquid-based systems.	Animal category: Buffalo				6	kg CH4/head/yr	Equation 10.22 in Volume 4 of the 2006 IPCC Guidelines for National Greenhouse Gas Inventories	Sheet 1 of 1, Category Code 3A2, Page A1.7 of Volume 4 of the 2006 IPCC Guidelines	See Annex 10A.2, Tables 10A-4 to 10A-8, Volume 4 of 2006 Guidelines, for derivation of these emission factors	2006 IPCC Guidelines for National Greenhouse Gas Inventories, Volume 4, Table 10.14 - Manure management methane emission factors by temperature for Cattle, Swine, and Buffalo, on page 10.38	IPCC	6	0.684932	Component	AFOLU
416158	4B - Manure Management	3.A.2 - Manure Management	METHANE	2006 IPCC default	Manure management methane emission factors by temperature for Buffalo	Solid based systems are used for the majority of manure. About one-third of livestock manure is managed in liquid-based systems.	Animal category: Buffalo				7	kg CH4/head/yr	Equation 10.22 in Volume 4 of the 2006 IPCC Guidelines for National Greenhouse Gas Inventories	Sheet 1 of 1, Category Code 3A2, Page A1.7 of Volume 4 of the 2006 IPCC Guidelines	See Annex 10A.2, Tables 10A-4 to 10A-8, Volume 4 of 2006 Guidelines, for derivation of these emission factors	2006 IPCC Guidelines for National Greenhouse Gas Inventories, Volume 4, Table 10.14 - Manure management methane emission factors by temperature for Cattle, Swine, and Buffalo, on page 10.38	IPCC	7	0.799087	Component	AFOLU
416159	4B - Manure Management	3.A.2 - Manure Management	METHANE	2006 IPCC default	Manure management methane emission factors by temperature for Buffalo	Solid based systems are used for the majority of manure. About one-third of livestock manure is managed in liquid-based systems.	Animal category: Buffalo				8	kg CH4/head/yr	Equation 10.22 in Volume 4 of the 2006 IPCC Guidelines for National Greenhouse Gas Inventories	Sheet 1 of 1, Category Code 3A2, Page A1.7 of Volume 4 of the 2006 IPCC Guidelines	See Annex 10A.2, Tables 10A-4 to 10A-8, Volume 4 of 2006 Guidelines, for derivation of these emission factors	2006 IPCC Guidelines for National Greenhouse Gas Inventories, Volume 4, Table 10.14 - Manure management methane emission factors by temperature for Cattle, Swine, and Buffalo, on page 10.38	IPCC	8	0.913242	Component	AFOLU
416160	4B - Manure Management	3.A.2 - Manure Management	METHANE	2006 IPCC default	Manure management methane emission factors by temperature for Buffalo	Solid based systems are used for the majority of manure. About one-third of livestock manure is managed in liquid-based systems.	Animal category: Buffalo				9	kg CH4/head/yr	Equation 10.22 in Volume 4 of the 2006 IPCC Guidelines for National Greenhouse Gas Inventories	Sheet 1 of 1, Category Code 3A2, Page A1.7 of Volume 4 of the 2006 IPCC Guidelines	See Annex 10A.2, Tables 10A-4 to 10A-8, Volume 4 of 2006 Guidelines, for derivation of these emission factors	2006 IPCC Guidelines for National Greenhouse Gas Inventories, Volume 4, Table 10.14 - Manure management methane emission factors by temperature for Cattle, Swine, and Buffalo, on page 10.38	IPCC	9	1.0274	Component	AFOLU
416161	4B - Manure Management	3.A.2 - Manure Management	METHANE	2006 IPCC default	Manure management methane emission factors by temperature for Buffalo	Solid based systems are used for the majority of manure. About one-third of livestock manure is managed in liquid-based systems.	Animal category: Buffalo				10	kg CH4/head/yr	Equation 10.22 in Volume 4 of the 2006 IPCC Guidelines for National Greenhouse Gas Inventories	Sheet 1 of 1, Category Code 3A2, Page A1.7 of Volume 4 of the 2006 IPCC Guidelines	See Annex 10A.2, Tables 10A-4 to 10A-8, Volume 4 of 2006 Guidelines, for derivation of these emission factors	2006 IPCC Guidelines for National Greenhouse Gas Inventories, Volume 4, Table 10.14 - Manure management methane emission factors by temperature for Cattle, Swine, and Buffalo, on page 10.38	IPCC	10	1.14155	Component	AFOLU
416162	4B - Manure Management	3.A.2 - Manure Management	METHANE	2006 IPCC default	Manure management methane emission factors by temperature for Buffalo	Solid based systems are used for the majority of manure. About one-third of livestock manure is managed in liquid-based systems.	Animal category: Buffalo				11	kg CH4/head/yr	Equation 10.22 in Volume 4 of the 2006 IPCC Guidelines for National Greenhouse Gas Inventories	Sheet 1 of 1, Category Code 3A2, Page A1.7 of Volume 4 of the 2006 IPCC Guidelines	See Annex 10A.2, Tables 10A-4 to 10A-8, Volume 4 of 2006 Guidelines, for derivation of these emission factors	2006 IPCC Guidelines for National Greenhouse Gas Inventories, Volume 4, Table 10.14 - Manure management methane emission factors by temperature for Cattle, Swine, and Buffalo, on page 10.38	IPCC	11	1.25571	Component	AFOLU
416163	4B - Manure Management	3.A.2 - Manure Management	METHANE	2006 IPCC default	Manure management methane emission factors by temperature for Buffalo	Solid based systems are used for the majority of manure. About one-third of livestock manure is managed in liquid-based systems.	Animal category: Buffalo				12	kg CH4/head/yr	Equation 10.22 in Volume 4 of the 2006 IPCC Guidelines for National Greenhouse Gas Inventories	Sheet 1 of 1, Category Code 3A2, Page A1.7 of Volume 4 of the 2006 IPCC Guidelines	See Annex 10A.2, Tables 10A-4 to 10A-8, Volume 4 of 2006 Guidelines, for derivation of these emission factors	2006 IPCC Guidelines for National Greenhouse Gas Inventories, Volume 4, Table 10.14 - Manure management methane emission factors by temperature for Cattle, Swine, and Buffalo, on page 10.38	IPCC	12	1.36986	Component	AFOLU
416164	4B - Manure Management	3.A.2 - Manure Management	METHANE	2006 IPCC default	Manure management methane emission factors by temperature for Buffalo	Solid based systems are used for the majority of manure. About one-third of livestock manure is managed in liquid-based systems.	Animal category: Buffalo				13	kg CH4/head/yr	Equation 10.22 in Volume 4 of the 2006 IPCC Guidelines for National Greenhouse Gas Inventories	Sheet 1 of 1, Category Code 3A2, Page A1.7 of Volume 4 of the 2006 IPCC Guidelines	See Annex 10A.2, Tables 10A-4 to 10A-8, Volume 4 of 2006 Guidelines, for derivation of these emission factors	2006 IPCC Guidelines for National Greenhouse Gas Inventories, Volume 4, Table 10.14 - Manure management methane emission factors by temperature for Cattle, Swine, and Buffalo, on page 10.38	IPCC	13	1.48402	Component	AFOLU
416165	4B - Manure Management	3.A.2 - Manure Management	METHANE	2006 IPCC default	Manure management methane emission factors by temperature for Buffalo	Solid based systems are used for the majority of manure. About one-third of livestock manure is managed in liquid-based systems.	Animal category: Buffalo				15	kg CH4/head/yr	Equation 10.22 in Volume 4 of the 2006 IPCC Guidelines for National Greenhouse Gas Inventories	Sheet 1 of 1, Category Code 3A2, Page A1.7 of Volume 4 of the 2006 IPCC Guidelines	See Annex 10A.2, Tables 10A-4 to 10A-8, Volume 4 of 2006 Guidelines, for derivation of these emission factors	2006 IPCC Guidelines for National Greenhouse Gas Inventories, Volume 4, Table 10.14 - Manure management methane emission factors by temperature for Cattle, Swine, and Buffalo, on page 10.38	IPCC	15	1.71233	Component	AFOLU
416166	4B - Manure Management	3.A.2 - Manure Management	METHANE	2006 IPCC default	Manure management methane emission factors by temperature for Buffalo	Solid based systems are used for the majority of manure. About one-third of livestock manure is managed in liquid-based systems.	Animal category: Buffalo				16	kg CH4/head/yr	Equation 10.22 in Volume 4 of the 2006 IPCC Guidelines for National Greenhouse Gas Inventories	Sheet 1 of 1, Category Code 3A2, Page A1.7 of Volume 4 of the 2006 IPCC Guidelines	See Annex 10A.2, Tables 10A-4 to 10A-8, Volume 4 of 2006 Guidelines, for derivation of these emission factors	2006 IPCC Guidelines for National Greenhouse Gas Inventories, Volume 4, Table 10.14 - Manure management methane emission factors by temperature for Cattle, Swine, and Buffalo, on page 10.38	IPCC	16	1.82648	Component	AFOLU
416167	4B - Manure Management	3.A.2 - Manure Management	METHANE	2006 IPCC default	Manure management methane emission factors by temperature for Buffalo	Solid based systems are used for the majority of manure. About one-third of livestock manure is managed in liquid-based systems.	Animal category: Buffalo				17	kg CH4/head/yr	Equation 10.22 in Volume 4 of the 2006 IPCC Guidelines for National Greenhouse Gas Inventories	Sheet 1 of 1, Category Code 3A2, Page A1.7 of Volume 4 of the 2006 IPCC Guidelines	See Annex 10A.2, Tables 10A-4 to 10A-8, Volume 4 of 2006 Guidelines, for derivation of these emission factors	2006 IPCC Guidelines for National Greenhouse Gas Inventories, Volume 4, Table 10.14 - Manure management methane emission factors by temperature for Cattle, Swine, and Buffalo, on page 10.38	IPCC	17	1.94064	Component	AFOLU
416168	4B - Manure Management	3.A.2 - Manure Management	METHANE	2006 IPCC default	Manure management methane emission factors by temperature for Buffalo	Solid based systems are used for the majority of manure. About one-third of livestock manure is managed in liquid-based systems.	Animal category: Buffalo				19	kg CH4/head/yr	Equation 10.22 in Volume 4 of the 2006 IPCC Guidelines for National Greenhouse Gas Inventories	Sheet 1 of 1, Category Code 3A2, Page A1.7 of Volume 4 of the 2006 IPCC Guidelines	See Annex 10A.2, Tables 10A-4 to 10A-8, Volume 4 of 2006 Guidelines, for derivation of these emission factors	2006 IPCC Guidelines for National Greenhouse Gas Inventories, Volume 4, Table 10.14 - Manure management methane emission factors by temperature for Cattle, Swine, and Buffalo, on page 10.38	IPCC	19	2.16895	Component	AFOLU
416169	4B - Manure Management	3.A.2 - Manure Management	METHANE	2006 IPCC default	Manure management methane emission factors by temperature for Dairy Cows	Most cattle manure is managed as a solid on pastures and ranges, except dairy cows where there is some usage of lagoons. About half of the swine manure is managed in anaerobic lagoons.	Animal category: Dairy Cows				23	kg CH4/head/yr	Equation 10.22 in Volume 4 of the 2006 IPCC Guidelines for National Greenhouse Gas Inventories	Sheet 1 of 1, Category Code 3A2, Page A1.7 of Volume 4 of the 2006 IPCC Guidelines	See Annex 10A.2, Tables 10A-4 to 10A-8, Volume 4 of 2006 Guidelines, for derivation of these emission factors	2006 IPCC Guidelines for National Greenhouse Gas Inventories, Volume 4, Table 10.14 - Manure management methane emission factors by temperature for Cattle, Swine, and Buffalo, on page 10.38	IPCC	23	2.62557	Component	AFOLU
416170	4B - Manure Management	3.A.2 - Manure Management	METHANE	2006 IPCC default	Manure management methane emission factors by temperature for Dairy Cows	Most cattle manure is managed as a solid on pastures and ranges, except dairy cows where there is some usage of lagoons. About half of the swine manure is managed in anaerobic lagoons.	Animal category: Dairy Cows				24	kg CH4/head/yr	Equation 10.22 in Volume 4 of the 2006 IPCC Guidelines for National Greenhouse Gas Inventories	Sheet 1 of 1, Category Code 3A2, Page A1.7 of Volume 4 of the 2006 IPCC Guidelines	See Annex 10A.2, Tables 10A-4 to 10A-8, Volume 4 of 2006 Guidelines, for derivation of these emission factors	2006 IPCC Guidelines for National Greenhouse Gas Inventories, Volume 4, Table 10.14 - Manure management methane emission factors by temperature for Cattle, Swine, and Buffalo, on page 10.38	IPCC	24	2.73973	Component	AFOLU
416171	4B - Manure Management	3.A.2 - Manure Management	METHANE	2006 IPCC default	Manure management methane emission factors by temperature for Dairy Cows	Most cattle manure is managed as a solid on pastures and ranges, except dairy cows where there is some usage of lagoons. About half of the swine manure is managed in anaerobic lagoons.	Animal category: Dairy Cows				25	kg CH4/head/yr	Equation 10.22 in Volume 4 of the 2006 IPCC Guidelines for National Greenhouse Gas Inventories	Sheet 1 of 1, Category Code 3A2, Page A1.7 of Volume 4 of the 2006 IPCC Guidelines	See Annex 10A.2, Tables 10A-4 to 10A-8, Volume 4 of 2006 Guidelines, for derivation of these emission factors	2006 IPCC Guidelines for National Greenhouse Gas Inventories, Volume 4, Table 10.14 - Manure management methane emission factors by temperature for Cattle, Swine, and Buffalo, on page 10.38	IPCC	25	2.85388	Component	AFOLU
416172	4B - Manure Management	3.A.2 - Manure Management	METHANE	2006 IPCC default	Manure management methane emission factors by temperature for Dairy Cows	Most cattle manure is managed as a solid on pastures and ranges, except dairy cows where there is some usage of lagoons. About half of the swine manure is managed in anaerobic lagoons.	Animal category: Dairy Cows				26	kg CH4/head/yr	Equation 10.22 in Volume 4 of the 2006 IPCC Guidelines for National Greenhouse Gas Inventories	Sheet 1 of 1, Category Code 3A2, Page A1.7 of Volume 4 of the 2006 IPCC Guidelines	See Annex 10A.2, Tables 10A-4 to 10A-8, Volume 4 of 2006 Guidelines, for derivation of these emission factors	2006 IPCC Guidelines for National Greenhouse Gas Inventories, Volume 4, Table 10.14 - Manure management methane emission factors by temperature for Cattle, Swine, and Buffalo, on page 10.38	IPCC	26	2.96804	Component	AFOLU
416173	4B - Manure Management	3.A.2 - Manure Management	METHANE	2006 IPCC default	Manure management methane emission factors by temperature for Dairy Cows	Most cattle manure is managed as a solid on pastures and ranges, except dairy cows where there is some usage of lagoons. About half of the swine manure is managed in anaerobic lagoons.	Animal category: Dairy Cows				27	kg CH4/head/yr	Equation 10.22 in Volume 4 of the 2006 IPCC Guidelines for National Greenhouse Gas Inventories	Sheet 1 of 1, Category Code 3A2, Page A1.7 of Volume 4 of the 2006 IPCC Guidelines	See Annex 10A.2, Tables 10A-4 to 10A-8, Volume 4 of 2006 Guidelines, for derivation of these emission factors	2006 IPCC Guidelines for National Greenhouse Gas Inventories, Volume 4, Table 10.14 - Manure management methane emission factors by temperature for Cattle, Swine, and Buffalo, on page 10.38	IPCC	27	3.08219	Component	AFOLU
416174	4B - Manure Management	3.A.2 - Manure Management	METHANE	2006 IPCC default	Manure management methane emission factors by temperature for Dairy Cows	Most cattle manure is managed as a solid on pastures and ranges, except dairy cows where there is some usage of lagoons. About half of the swine manure is managed in anaerobic lagoons.	Animal category: Dairy Cows				28	kg CH4/head/yr	Equation 10.22 in Volume 4 of the 2006 IPCC Guidelines for National Greenhouse Gas Inventories	Sheet 1 of 1, Category Code 3A2, Page A1.7 of Volume 4 of the 2006 IPCC Guidelines	See Annex 10A.2, Tables 10A-4 to 10A-8, Volume 4 of 2006 Guidelines, for derivation of these emission factors	2006 IPCC Guidelines for National Greenhouse Gas Inventories, Volume 4, Table 10.14 - Manure management methane emission factors by temperature for Cattle, Swine, and Buffalo, on page 10.38	IPCC	28	3.19635	Component	AFOLU
416175	4B - Manure Management	3.A.2 - Manure Management	METHANE	2006 IPCC default	Manure management methane emission factors by temperature for Dairy Cows	Most cattle manure is managed as a solid on pastures and ranges, except dairy cows where there is some usage of lagoons. About half of the swine manure is managed in anaerobic lagoons.	Animal category: Dairy Cows				29	kg CH4/head/yr	Equation 10.22 in Volume 4 of the 2006 IPCC Guidelines for National Greenhouse Gas Inventories	Sheet 1 of 1, Category Code 3A2, Page A1.7 of Volume 4 of the 2006 IPCC Guidelines	See Annex 10A.2, Tables 10A-4 to 10A-8, Volume 4 of 2006 Guidelines, for derivation of these emission factors	2006 IPCC Guidelines for National Greenhouse Gas Inventories, Volume 4, Table 10.14 - Manure management methane emission factors by temperature for Cattle, Swine, and Buffalo, on page 10.38	IPCC	29	3.3105	Component	AFOLU
416176	4B - Manure Management	3.A.2 - Manure Management	METHANE	2006 IPCC default	Manure management methane emission factors by temperature for Dairy Cows	Most cattle manure is managed as a solid on pastures and ranges, except dairy cows where there is some usage of lagoons. About half of the swine manure is managed in anaerobic lagoons.	Animal category: Dairy Cows				30	kg CH4/head/yr	Equation 10.22 in Volume 4 of the 2006 IPCC Guidelines for National Greenhouse Gas Inventories	Sheet 1 of 1, Category Code 3A2, Page A1.7 of Volume 4 of the 2006 IPCC Guidelines	See Annex 10A.2, Tables 10A-4 to 10A-8, Volume 4 of 2006 Guidelines, for derivation of these emission factors	2006 IPCC Guidelines for National Greenhouse Gas Inventories, Volume 4, Table 10.14 - Manure management methane emission factors by temperature for Cattle, Swine, and Buffalo, on page 10.38	IPCC	30	3.42466	Component	AFOLU
416177	4B - Manure Management	3.A.2 - Manure Management	METHANE	2006 IPCC default	Manure management methane emission factors by temperature for Dairy Cows	Most cattle manure is managed as a solid on pastures and ranges, except dairy cows where there is some usage of lagoons. About half of the swine manure is managed in anaerobic lagoons.	Animal category: Dairy Cows				31	kg CH4/head/yr	Equation 10.22 in Volume 4 of the 2006 IPCC Guidelines for National Greenhouse Gas Inventories	Sheet 1 of 1, Category Code 3A2, Page A1.7 of Volume 4 of the 2006 IPCC Guidelines	See Annex 10A.2, Tables 10A-4 to 10A-8, Volume 4 of 2006 Guidelines, for derivation of these emission factors	2006 IPCC Guidelines for National Greenhouse Gas Inventories, Volume 4, Table 10.14 - Manure management methane emission factors by temperature for Cattle, Swine, and Buffalo, on page 10.38	IPCC	31	3.53881	Component	AFOLU
416178	4B - Manure Management	3.A.2 - Manure Management	METHANE	2006 IPCC default	Manure management methane emission factors by temperature for Other Cattle	Most cattle manure is managed as a solid on pastures and ranges, except dairy cows where there is some usage of lagoons. About half of the swine manure is managed in anaerobic lagoons.	Animal category: Other Cattle				1	kg CH4/head/yr	Equation 10.22 in Volume 4 of the 2006 IPCC Guidelines for National Greenhouse Gas Inventories	Sheet 1 of 1, Category Code 3A2, Page A1.7 of Volume 4 of the 2006 IPCC Guidelines	See Annex 10A.2, Tables 10A-4 to 10A-8, Volume 4 of 2006 Guidelines, for derivation of these emission factors	2006 IPCC Guidelines for National Greenhouse Gas Inventories, Volume 4, Table 10.14 - Manure management methane emission factors by temperature for Cattle, Swine, and Buffalo, on page 10.38	IPCC	1	0.114155	Component	AFOLU
416179	4B - Manure Management	3.A.2 - Manure Management	METHANE	2006 IPCC default	Manure management methane emission factors by temperature for Other Cattle	Most cattle manure is managed as a solid on pastures and ranges, except dairy cows where there is some usage of lagoons. About half of the swine manure is managed in anaerobic lagoons.	Animal category: Other Cattle				2	kg CH4/head/yr	Equation 10.22 in Volume 4 of the 2006 IPCC Guidelines for National Greenhouse Gas Inventories	Sheet 1 of 1, Category Code 3A2, Page A1.7 of Volume 4 of the 2006 IPCC Guidelines	See Annex 10A.2, Tables 10A-4 to 10A-8, Volume 4 of 2006 Guidelines, for derivation of these emission factors	2006 IPCC Guidelines for National Greenhouse Gas Inventories, Volume 4, Table 10.14 - Manure management methane emission factors by temperature for Cattle, Swine, and Buffalo, on page 10.38	IPCC	2	0.228311	Component	AFOLU
416180	4B - Manure Management	3.A.2 - Manure Management	METHANE	2006 IPCC default	Manure management methane emission factors by temperature for Market Swine	Most cattle manure is managed as a solid on pastures and ranges, except dairy cows where there is some usage of lagoons. About half of the swine manure is managed in anaerobic lagoons.	Animal category: Market Swine				11	kg CH4/head/yr	Equation 10.22 in Volume 4 of the 2006 IPCC Guidelines for National Greenhouse Gas Inventories	Sheet 1 of 1, Category Code 3A2, Page A1.7 of Volume 4 of the 2006 IPCC Guidelines	See Annex 10A.2, Tables 10A-4 to 10A-8, Volume 4 of 2006 Guidelines, for derivation of these emission factors	2006 IPCC Guidelines for National Greenhouse Gas Inventories, Volume 4, Table 10.14 - Manure management methane emission factors by temperature for Cattle, Swine, and Buffalo, on page 10.38	IPCC	11	1.25571	Component	AFOLU
416181	4B - Manure Management	3.A.2 - Manure Management	METHANE	2006 IPCC default	Manure management methane emission factors by temperature for Market Swine	Most cattle manure is managed as a solid on pastures and ranges, except dairy cows where there is some usage of lagoons. About half of the swine manure is managed in anaerobic lagoons.	Animal category: Market Swine				12	kg CH4/head/yr	Equation 10.22 in Volume 4 of the 2006 IPCC Guidelines for National Greenhouse Gas Inventories	Sheet 1 of 1, Category Code 3A2, Page A1.7 of Volume 4 of the 2006 IPCC Guidelines	See Annex 10A.2, Tables 10A-4 to 10A-8, Volume 4 of 2006 Guidelines, for derivation of these emission factors	2006 IPCC Guidelines for National Greenhouse Gas Inventories, Volume 4, Table 10.14 - Manure management methane emission factors by temperature for Cattle, Swine, and Buffalo, on page 10.38	IPCC	12	1.36986	Component	AFOLU
416182	4B - Manure Management	3.A.2 - Manure Management	METHANE	2006 IPCC default	Manure management methane emission factors by temperature for Market Swine	Most cattle manure is managed as a solid on pastures and ranges, except dairy cows where there is some usage of lagoons. About half of the swine manure is managed in anaerobic lagoons.	Animal category: Market Swine				13	kg CH4/head/yr	Equation 10.22 in Volume 4 of the 2006 IPCC Guidelines for National Greenhouse Gas Inventories	Sheet 1 of 1, Category Code 3A2, Page A1.7 of Volume 4 of the 2006 IPCC Guidelines	See Annex 10A.2, Tables 10A-4 to 10A-8, Volume 4 of 2006 Guidelines, for derivation of these emission factors	2006 IPCC Guidelines for National Greenhouse Gas Inventories, Volume 4, Table 10.14 - Manure management methane emission factors by temperature for Cattle, Swine, and Buffalo, on page 10.38	IPCC	13	1.48402	Component	AFOLU
416183	4B - Manure Management	3.A.2 - Manure Management	METHANE	2006 IPCC default	Manure management methane emission factors by temperature for Breeding Swine	Most cattle manure is managed as a solid on pastures and ranges, except dairy cows where there is some usage of lagoons. About half of the swine manure is managed in anaerobic lagoons.	Animal category: Breeding Swine				20	kg CH4/head/yr	Equation 10.22 in Volume 4 of the 2006 IPCC Guidelines for National Greenhouse Gas Inventories	Sheet 1 of 1, Category Code 3A2, Page A1.7 of Volume 4 of the 2006 IPCC Guidelines	See Annex 10A.2, Tables 10A-4 to 10A-8, Volume 4 of 2006 Guidelines, for derivation of these emission factors	2006 IPCC Guidelines for National Greenhouse Gas Inventories, Volume 4, Table 10.14 - Manure management methane emission factors by temperature for Cattle, Swine, and Buffalo, on page 10.38	IPCC	20	2.28311	Component	AFOLU
416184	4B - Manure Management	3.A.2 - Manure Management	METHANE	2006 IPCC default	Manure management methane emission factors by temperature for Breeding Swine	Most cattle manure is managed as a solid on pastures and ranges, except dairy cows where there is some usage of lagoons. About half of the swine manure is managed in anaerobic lagoons.	Animal category: Breeding Swine				21	kg CH4/head/yr	Equation 10.22 in Volume 4 of the 2006 IPCC Guidelines for National Greenhouse Gas Inventories	Sheet 1 of 1, Category Code 3A2, Page A1.7 of Volume 4 of the 2006 IPCC Guidelines	See Annex 10A.2, Tables 10A-4 to 10A-8, Volume 4 of 2006 Guidelines, for derivation of these emission factors	2006 IPCC Guidelines for National Greenhouse Gas Inventories, Volume 4, Table 10.14 - Manure management methane emission factors by temperature for Cattle, Swine, and Buffalo, on page 10.38	IPCC	21	2.39726	Component	AFOLU
416185	4B - Manure Management	3.A.2 - Manure Management	METHANE	2006 IPCC default	Manure management methane emission factors by temperature for Breeding Swine	Most cattle manure is managed as a solid on pastures and ranges, except dairy cows where there is some usage of lagoons. About half of the swine manure is managed in anaerobic lagoons.	Animal category: Breeding Swine				22	kg CH4/head/yr	Equation 10.22 in Volume 4 of the 2006 IPCC Guidelines for National Greenhouse Gas Inventories	Sheet 1 of 1, Category Code 3A2, Page A1.7 of Volume 4 of the 2006 IPCC Guidelines	See Annex 10A.2, Tables 10A-4 to 10A-8, Volume 4 of 2006 Guidelines, for derivation of these emission factors	2006 IPCC Guidelines for National Greenhouse Gas Inventories, Volume 4, Table 10.14 - Manure management methane emission factors by temperature for Cattle, Swine, and Buffalo, on page 10.38	IPCC	22	2.51142	Component	AFOLU
416186	4B - Manure Management	3.A.2 - Manure Management	METHANE	2006 IPCC default	Manure management methane emission factors by temperature for Breeding Swine	Most cattle manure is managed as a solid on pastures and ranges, except dairy cows where there is some usage of lagoons. About half of the swine manure is managed in anaerobic lagoons.	Animal category: Breeding Swine				23	kg CH4/head/yr	Equation 10.22 in Volume 4 of the 2006 IPCC Guidelines for National Greenhouse Gas Inventories	Sheet 1 of 1, Category Code 3A2, Page A1.7 of Volume 4 of the 2006 IPCC Guidelines	See Annex 10A.2, Tables 10A-4 to 10A-8, Volume 4 of 2006 Guidelines, for derivation of these emission factors	2006 IPCC Guidelines for National Greenhouse Gas Inventories, Volume 4, Table 10.14 - Manure management methane emission factors by temperature for Cattle, Swine, and Buffalo, on page 10.38	IPCC	23	2.62557	Component	AFOLU
416187	4B - Manure Management	3.A.2 - Manure Management	METHANE	2006 IPCC default	Manure management methane emission factors by temperature for Breeding Swine	Most cattle manure is managed as a solid on pastures and ranges, except dairy cows where there is some usage of lagoons. About half of the swine manure is managed in anaerobic lagoons.	Animal category: Breeding Swine				24	kg CH4/head/yr	Equation 10.22 in Volume 4 of the 2006 IPCC Guidelines for National Greenhouse Gas Inventories	Sheet 1 of 1, Category Code 3A2, Page A1.7 of Volume 4 of the 2006 IPCC Guidelines	See Annex 10A.2, Tables 10A-4 to 10A-8, Volume 4 of 2006 Guidelines, for derivation of these emission factors	2006 IPCC Guidelines for National Greenhouse Gas Inventories, Volume 4, Table 10.14 - Manure management methane emission factors by temperature for Cattle, Swine, and Buffalo, on page 10.38	IPCC	24	2.73973	Component	AFOLU
416188	4B - Manure Management	3.A.2 - Manure Management	METHANE	2006 IPCC default	Manure management methane emission factors by temperature for Dairy Cows	Almost all livestock manure is managed as a solid on pastures and ranges. Buffalo manure is deposited on pastures and ranges.	Animal category: Dairy Cows				1	kg CH4/head/yr	Equation 10.22 in Volume 4 of the 2006 IPCC Guidelines for National Greenhouse Gas Inventories	Sheet 1 of 1, Category Code 3A2, Page A1.7 of Volume 4 of the 2006 IPCC Guidelines	See Annex 10A.2, Tables 10A-4 to 10A-8, Volume 4 of 2006 Guidelines, for derivation of these emission factors	2006 IPCC Guidelines for National Greenhouse Gas Inventories, Volume 4, Table 10.14 - Manure management methane emission factors by temperature for Cattle, Swine, and Buffalo, on page 10.38	IPCC	1	0.114155	Component	AFOLU
416189	4B - Manure Management	3.A.2 - Manure Management	METHANE	2006 IPCC default	Manure management methane emission factors by temperature for Dairy Cows	Almost all livestock manure is managed as a solid on pastures and ranges. Buffalo manure is deposited on pastures and ranges.	Animal category: Dairy Cows				2	kg CH4/head/yr	Equation 10.22 in Volume 4 of the 2006 IPCC Guidelines for National Greenhouse Gas Inventories	Sheet 1 of 1, Category Code 3A2, Page A1.7 of Volume 4 of the 2006 IPCC Guidelines	See Annex 10A.2, Tables 10A-4 to 10A-8, Volume 4 of 2006 Guidelines, for derivation of these emission factors	2006 IPCC Guidelines for National Greenhouse Gas Inventories, Volume 4, Table 10.14 - Manure management methane emission factors by temperature for Cattle, Swine, and Buffalo, on page 10.38	IPCC	2	0.228311	Component	AFOLU
416190	4B - Manure Management	3.A.2 - Manure Management	METHANE	2006 IPCC default	Manure management methane emission factors by temperature for Other Cattle	Almost all livestock manure is managed as a solid on pastures and ranges. Buffalo manure is deposited on pastures and ranges.	Animal category: Other Cattle				1	kg CH4/head/yr	Equation 10.22 in Volume 4 of the 2006 IPCC Guidelines for National Greenhouse Gas Inventories	Sheet 1 of 1, Category Code 3A2, Page A1.7 of Volume 4 of the 2006 IPCC Guidelines	See Annex 10A.2, Tables 10A-4 to 10A-8, Volume 4 of 2006 Guidelines, for derivation of these emission factors	2006 IPCC Guidelines for National Greenhouse Gas Inventories, Volume 4, Table 10.14 - Manure management methane emission factors by temperature for Cattle, Swine, and Buffalo, on page 10.38	IPCC	1	0.114155	Component	AFOLU
416191	4B - Manure Management	3.A.2 - Manure Management	METHANE	2006 IPCC default	Manure management methane emission factors by temperature for Buffalo	Almost all livestock manure is managed as a solid on pastures and ranges. Buffalo manure is deposited on pastures and ranges.	Animal category: Buffalo				1	kg CH4/head/yr	Equation 10.22 in Volume 4 of the 2006 IPCC Guidelines for National Greenhouse Gas Inventories	Sheet 1 of 1, Category Code 3A2, Page A1.7 of Volume 4 of the 2006 IPCC Guidelines	See Annex 10A.2, Tables 10A-4 to 10A-8, Volume 4 of 2006 Guidelines, for derivation of these emission factors	2006 IPCC Guidelines for National Greenhouse Gas Inventories, Volume 4, Table 10.14 - Manure management methane emission factors by temperature for Cattle, Swine, and Buffalo, on page 10.38	IPCC	1	0.114155	Component	AFOLU
416192	4B - Manure Management	3.A.2 - Manure Management	METHANE	2006 IPCC default	Manure management methane emission factors by temperature for Buffalo	Almost all livestock manure is managed as a solid on pastures and ranges. Buffalo manure is deposited on pastures and ranges.	Animal category: Buffalo				2	kg CH4/head/yr	Equation 10.22 in Volume 4 of the 2006 IPCC Guidelines for National Greenhouse Gas Inventories	Sheet 1 of 1, Category Code 3A2, Page A1.7 of Volume 4 of the 2006 IPCC Guidelines	See Annex 10A.2, Tables 10A-4 to 10A-8, Volume 4 of 2006 Guidelines, for derivation of these emission factors	2006 IPCC Guidelines for National Greenhouse Gas Inventories, Volume 4, Table 10.14 - Manure management methane emission factors by temperature for Cattle, Swine, and Buffalo, on page 10.38	IPCC	2	0.228311	Component	AFOLU
416193	4B - Manure Management	3.A.2 - Manure Management	METHANE	2006 IPCC default	Manure management methane emission factors by temperature for Dairy Cows	Most livestock manure is managed as a solid on pastures and ranges. A smaller, but significant fraction is burned as fuel.	Animal category: Dairy Cows				1	kg CH4/head/yr	Equation 10.22 in Volume 4 of the 2006 IPCC Guidelines for National Greenhouse Gas Inventories	Sheet 1 of 1, Category Code 3A2, Page A1.7 of Volume 4 of the 2006 IPCC Guidelines	See Annex 10A.2, Tables 10A-4 to 10A-8, Volume 4 of 2006 Guidelines, for derivation of these emission factors	2006 IPCC Guidelines for National Greenhouse Gas Inventories, Volume 4, Table 10.14 - Manure management methane emission factors by temperature for Cattle, Swine, and Buffalo, on page 10.38	IPCC	1	0.114155	Component	AFOLU
416194	4B - Manure Management	3.A.2 - Manure Management	METHANE	2006 IPCC default	Manure management methane emission factors by temperature for Other Cattle	Most livestock manure is managed as a solid on pastures and ranges. A smaller, but significant fraction is burned as fuel.	Animal category: Other Cattle				0	kg CH4/head/yr	Equation 10.22 in Volume 4 of the 2006 IPCC Guidelines for National Greenhouse Gas Inventories	Sheet 1 of 1, Category Code 3A2, Page A1.7 of Volume 4 of the 2006 IPCC Guidelines	See Annex 10A.2, Tables 10A-4 to 10A-8, Volume 4 of 2006 Guidelines, for derivation of these emission factors	2006 IPCC Guidelines for National Greenhouse Gas Inventories, Volume 4, Table 10.14 - Manure management methane emission factors by temperature for Cattle, Swine, and Buffalo, on page 10.38	IPCC	0	0	Component	AFOLU
416195	4B - Manure Management	3.A.2 - Manure Management	METHANE	2006 IPCC default	Manure management methane emission factors by temperature for Other Cattle	Most livestock manure is managed as a solid on pastures and ranges. A smaller, but significant fraction is burned as fuel.	Animal category: Other Cattle				1	kg CH4/head/yr	Equation 10.22 in Volume 4 of the 2006 IPCC Guidelines for National Greenhouse Gas Inventories	Sheet 1 of 1, Category Code 3A2, Page A1.7 of Volume 4 of the 2006 IPCC Guidelines	See Annex 10A.2, Tables 10A-4 to 10A-8, Volume 4 of 2006 Guidelines, for derivation of these emission factors	2006 IPCC Guidelines for National Greenhouse Gas Inventories, Volume 4, Table 10.14 - Manure management methane emission factors by temperature for Cattle, Swine, and Buffalo, on page 10.38	IPCC	1	0.114155	Component	AFOLU
416196	4B - Manure Management	3.A.2 - Manure Management	METHANE	2006 IPCC default	Manure management methane emission factors by temperature for Swine	Most livestock manure is managed as a solid on pastures and ranges. A smaller, but significant fraction is burned as fuel.	Animal category: Swine				0	kg CH4/head/yr	Equation 10.22 in Volume 4 of the 2006 IPCC Guidelines for National Greenhouse Gas Inventories	Sheet 1 of 1, Category Code 3A2, Page A1.7 of Volume 4 of the 2006 IPCC Guidelines	See Annex 10A.2, Tables 10A-4 to 10A-8, Volume 4 of 2006 Guidelines, for derivation of these emission factors	2006 IPCC Guidelines for National Greenhouse Gas Inventories, Volume 4, Table 10.14 - Manure management methane emission factors by temperature for Cattle, Swine, and Buffalo, on page 10.38	IPCC	0	0	Component	AFOLU
416197	4B - Manure Management	3.A.2 - Manure Management	METHANE	2006 IPCC default	Manure management methane emission factors by temperature for Swine	Most livestock manure is managed as a solid on pastures and ranges. A smaller, but significant fraction is burned as fuel.	Animal category: Swine				1	kg CH4/head/yr	Equation 10.22 in Volume 4 of the 2006 IPCC Guidelines for National Greenhouse Gas Inventories	Sheet 1 of 1, Category Code 3A2, Page A1.7 of Volume 4 of the 2006 IPCC Guidelines	See Annex 10A.2, Tables 10A-4 to 10A-8, Volume 4 of 2006 Guidelines, for derivation of these emission factors	2006 IPCC Guidelines for National Greenhouse Gas Inventories, Volume 4, Table 10.14 - Manure management methane emission factors by temperature for Cattle, Swine, and Buffalo, on page 10.38	IPCC	1	0.114155	Component	AFOLU
416198	4B - Manure Management	3.A.2 - Manure Management	METHANE	2006 IPCC default	Manure management methane emission factors by temperature for Swine	Most livestock manure is managed as a solid on pastures and ranges. A smaller, but significant fraction is burned as fuel.	Animal category: Swine				2	kg CH4/head/yr	Equation 10.22 in Volume 4 of the 2006 IPCC Guidelines for National Greenhouse Gas Inventories	Sheet 1 of 1, Category Code 3A2, Page A1.7 of Volume 4 of the 2006 IPCC Guidelines	See Annex 10A.2, Tables 10A-4 to 10A-8, Volume 4 of 2006 Guidelines, for derivation of these emission factors	2006 IPCC Guidelines for National Greenhouse Gas Inventories, Volume 4, Table 10.14 - Manure management methane emission factors by temperature for Cattle, Swine, and Buffalo, on page 10.38	IPCC	2	0.228311	Component	AFOLU
416199	4B - Manure Management	3.A.2 - Manure Management	METHANE	2006 IPCC default	Manure management methane emission factors by temperature for Dairy Cows	Over two-thirds of cattle manure is deposited on pastures and ranges. About one-third of swine manure is managed in liquid-based systems. Buffalo manure is burned for fuel or managed as a solid.	Animal category: Dairy Cows				2	kg CH4/head/yr	Equation 10.22 in Volume 4 of the 2006 IPCC Guidelines for National Greenhouse Gas Inventories	Sheet 1 of 1, Category Code 3A2, Page A1.7 of Volume 4 of the 2006 IPCC Guidelines	See Annex 10A.2, Tables 10A-4 to 10A-8, Volume 4 of 2006 Guidelines, for derivation of these emission factors	2006 IPCC Guidelines for National Greenhouse Gas Inventories, Volume 4, Table 10.14 - Manure management methane emission factors by temperature for Cattle, Swine, and Buffalo, on page 10.38	IPCC	2	0.228311	Component	AFOLU
416200	4B - Manure Management	3.A.2 - Manure Management	METHANE	2006 IPCC default	Manure management methane emission factors by temperature for Dairy Cows	Over two-thirds of cattle manure is deposited on pastures and ranges. About one-third of swine manure is managed in liquid-based systems. Buffalo manure is burned for fuel or managed as a solid.	Animal category: Dairy Cows				3	kg CH4/head/yr	Equation 10.22 in Volume 4 of the 2006 IPCC Guidelines for National Greenhouse Gas Inventories	Sheet 1 of 1, Category Code 3A2, Page A1.7 of Volume 4 of the 2006 IPCC Guidelines	See Annex 10A.2, Tables 10A-4 to 10A-8, Volume 4 of 2006 Guidelines, for derivation of these emission factors	2006 IPCC Guidelines for National Greenhouse Gas Inventories, Volume 4, Table 10.14 - Manure management methane emission factors by temperature for Cattle, Swine, and Buffalo, on page 10.38	IPCC	3	0.342466	Component	AFOLU
416201	4B - Manure Management	3.A.2 - Manure Management	METHANE	2006 IPCC default	Manure management methane emission factors by temperature for Other Cattle	Over two-thirds of cattle manure is deposited on pastures and ranges. About one-third of swine manure is managed in liquid-based systems. Buffalo manure is burned for fuel or managed as a solid.	Animal category: Other Cattle				1	kg CH4/head/yr	Equation 10.22 in Volume 4 of the 2006 IPCC Guidelines for National Greenhouse Gas Inventories	Sheet 1 of 1, Category Code 3A2, Page A1.7 of Volume 4 of the 2006 IPCC Guidelines	See Annex 10A.2, Tables 10A-4 to 10A-8, Volume 4 of 2006 Guidelines, for derivation of these emission factors	2006 IPCC Guidelines for National Greenhouse Gas Inventories, Volume 4, Table 10.14 - Manure management methane emission factors by temperature for Cattle, Swine, and Buffalo, on page 10.38	IPCC	1	0.114155	Component	AFOLU
416202	4B - Manure Management	3.A.2 - Manure Management	METHANE	2006 IPCC default	Manure management methane emission factors by temperature for Swine	Over two-thirds of cattle manure is deposited on pastures and ranges. About one-third of swine manure is managed in liquid-based systems. Buffalo manure is burned for fuel or managed as a solid.	Animal category: Swine				1	kg CH4/head/yr	Equation 10.22 in Volume 4 of the 2006 IPCC Guidelines for National Greenhouse Gas Inventories	Sheet 1 of 1, Category Code 3A2, Page A1.7 of Volume 4 of the 2006 IPCC Guidelines	See Annex 10A.2, Tables 10A-4 to 10A-8, Volume 4 of 2006 Guidelines, for derivation of these emission factors	2006 IPCC Guidelines for National Greenhouse Gas Inventories, Volume 4, Table 10.14 - Manure management methane emission factors by temperature for Cattle, Swine, and Buffalo, on page 10.38	IPCC	1	0.114155	Component	AFOLU
416203	4B - Manure Management	3.A.2 - Manure Management	METHANE	2006 IPCC default	Manure management methane emission factors by temperature for Swine	Over two-thirds of cattle manure is deposited on pastures and ranges. About one-third of swine manure is managed in liquid-based systems. Buffalo manure is burned for fuel or managed as a solid.	Animal category: Swine				2	kg CH4/head/yr	Equation 10.22 in Volume 4 of the 2006 IPCC Guidelines for National Greenhouse Gas Inventories	Sheet 1 of 1, Category Code 3A2, Page A1.7 of Volume 4 of the 2006 IPCC Guidelines	See Annex 10A.2, Tables 10A-4 to 10A-8, Volume 4 of 2006 Guidelines, for derivation of these emission factors	2006 IPCC Guidelines for National Greenhouse Gas Inventories, Volume 4, Table 10.14 - Manure management methane emission factors by temperature for Cattle, Swine, and Buffalo, on page 10.38	IPCC	2	0.228311	Component	AFOLU
416204	4B - Manure Management	3.A.2 - Manure Management	METHANE	2006 IPCC default	Manure management methane emission factors by temperature for Swine	Over two-thirds of cattle manure is deposited on pastures and ranges. About one-third of swine manure is managed in liquid-based systems. Buffalo manure is burned for fuel or managed as a solid.	Animal category: Swine				3	kg CH4/head/yr	Equation 10.22 in Volume 4 of the 2006 IPCC Guidelines for National Greenhouse Gas Inventories	Sheet 1 of 1, Category Code 3A2, Page A1.7 of Volume 4 of the 2006 IPCC Guidelines	See Annex 10A.2, Tables 10A-4 to 10A-8, Volume 4 of 2006 Guidelines, for derivation of these emission factors	2006 IPCC Guidelines for National Greenhouse Gas Inventories, Volume 4, Table 10.14 - Manure management methane emission factors by temperature for Cattle, Swine, and Buffalo, on page 10.38	IPCC	3	0.342466	Component	AFOLU
416205	4B - Manure Management	3.A.2 - Manure Management	METHANE	2006 IPCC default	Manure management methane emission factors by temperature for Swine	Over two-thirds of cattle manure is deposited on pastures and ranges. About one-third of swine manure is managed in liquid-based systems. Buffalo manure is burned for fuel or managed as a solid.	Animal category: Swine				4	kg CH4/head/yr	Equation 10.22 in Volume 4 of the 2006 IPCC Guidelines for National Greenhouse Gas Inventories	Sheet 1 of 1, Category Code 3A2, Page A1.7 of Volume 4 of the 2006 IPCC Guidelines	See Annex 10A.2, Tables 10A-4 to 10A-8, Volume 4 of 2006 Guidelines, for derivation of these emission factors	2006 IPCC Guidelines for National Greenhouse Gas Inventories, Volume 4, Table 10.14 - Manure management methane emission factors by temperature for Cattle, Swine, and Buffalo, on page 10.38	IPCC	4	0.456621	Component	AFOLU
416206	4B - Manure Management	3.A.2 - Manure Management	METHANE	2006 IPCC default	Manure management methane emission factors by temperature for Swine	Over two-thirds of cattle manure is deposited on pastures and ranges. About one-third of swine manure is managed in liquid-based systems. Buffalo manure is burned for fuel or managed as a solid.	Animal category: Swine				5	kg CH4/head/yr	Equation 10.22 in Volume 4 of the 2006 IPCC Guidelines for National Greenhouse Gas Inventories	Sheet 1 of 1, Category Code 3A2, Page A1.7 of Volume 4 of the 2006 IPCC Guidelines	See Annex 10A.2, Tables 10A-4 to 10A-8, Volume 4 of 2006 Guidelines, for derivation of these emission factors	2006 IPCC Guidelines for National Greenhouse Gas Inventories, Volume 4, Table 10.14 - Manure management methane emission factors by temperature for Cattle, Swine, and Buffalo, on page 10.38	IPCC	5	0.570776	Component	AFOLU
416207	4B - Manure Management	3.A.2 - Manure Management	METHANE	2006 IPCC default	Manure management methane emission factors by temperature for Swine	Over two-thirds of cattle manure is deposited on pastures and ranges. About one-third of swine manure is managed in liquid-based systems. Buffalo manure is burned for fuel or managed as a solid.	Animal category: Swine				6	kg CH4/head/yr	Equation 10.22 in Volume 4 of the 2006 IPCC Guidelines for National Greenhouse Gas Inventories	Sheet 1 of 1, Category Code 3A2, Page A1.7 of Volume 4 of the 2006 IPCC Guidelines	See Annex 10A.2, Tables 10A-4 to 10A-8, Volume 4 of 2006 Guidelines, for derivation of these emission factors	2006 IPCC Guidelines for National Greenhouse Gas Inventories, Volume 4, Table 10.14 - Manure management methane emission factors by temperature for Cattle, Swine, and Buffalo, on page 10.38	IPCC	6	0.684932	Component	AFOLU
416208	4B - Manure Management	3.A.2 - Manure Management	METHANE	2006 IPCC default	Manure management methane emission factors by temperature for Buffalo	Over two-thirds of cattle manure is deposited on pastures and ranges. About one-third of swine manure is managed in liquid-based systems. Buffalo manure is burned for fuel or managed as a solid.	Animal category: Buffalo				4	kg CH4/head/yr	Equation 10.22 in Volume 4 of the 2006 IPCC Guidelines for National Greenhouse Gas Inventories	Sheet 1 of 1, Category Code 3A2, Page A1.7 of Volume 4 of the 2006 IPCC Guidelines	See Annex 10A.2, Tables 10A-4 to 10A-8, Volume 4 of 2006 Guidelines, for derivation of these emission factors	2006 IPCC Guidelines for National Greenhouse Gas Inventories, Volume 4, Table 10.14 - Manure management methane emission factors by temperature for Cattle, Swine, and Buffalo, on page 10.38	IPCC	4	0.456621	Component	AFOLU
416209	4B - Manure Management	3.A.2 - Manure Management	METHANE	2006 IPCC default	Manure management methane emission factors by temperature for Buffalo	Over two-thirds of cattle manure is deposited on pastures and ranges. About one-third of swine manure is managed in liquid-based systems. Buffalo manure is burned for fuel or managed as a solid.	Animal category: Buffalo				5	kg CH4/head/yr	Equation 10.22 in Volume 4 of the 2006 IPCC Guidelines for National Greenhouse Gas Inventories	Sheet 1 of 1, Category Code 3A2, Page A1.7 of Volume 4 of the 2006 IPCC Guidelines	See Annex 10A.2, Tables 10A-4 to 10A-8, Volume 4 of 2006 Guidelines, for derivation of these emission factors	2006 IPCC Guidelines for National Greenhouse Gas Inventories, Volume 4, Table 10.14 - Manure management methane emission factors by temperature for Cattle, Swine, and Buffalo, on page 10.38	IPCC	5	0.570776	Component	AFOLU
416210	4B - Manure Management	3.A.2 - Manure Management	METHANE	2006 IPCC default	Manure management methane emission factors by temperature for Dairy Cows	About half of cattle manure is used for fuel with the remainder managed in dry systems. Almost 40% of swine manure is managed as a liquid. Buffalo manure is managed in drylots and deposited in pastures and ranges.	Animal category: Dairy Cows				9	kg CH4/head/yr	Equation 10.22 in Volume 4 of the 2006 IPCC Guidelines for National Greenhouse Gas Inventories	Sheet 1 of 1, Category Code 3A2, Page A1.7 of Volume 4 of the 2006 IPCC Guidelines	See Annex 10A.2, Tables 10A-4 to 10A-8, Volume 4 of 2006 Guidelines, for derivation of these emission factors	2006 IPCC Guidelines for National Greenhouse Gas Inventories, Volume 4, Table 10.14 - Manure management methane emission factors by temperature for Cattle, Swine, and Buffalo, on page 10.38	IPCC	9	1.0274	Component	AFOLU
416211	4B - Manure Management	3.A.2 - Manure Management	METHANE	2006 IPCC default	Manure management methane emission factors by temperature for Dairy Cows	About half of cattle manure is used for fuel with the remainder managed in dry systems. Almost 40% of swine manure is managed as a liquid. Buffalo manure is managed in drylots and deposited in pastures and ranges.	Animal category: Dairy Cows				10	kg CH4/head/yr	Equation 10.22 in Volume 4 of the 2006 IPCC Guidelines for National Greenhouse Gas Inventories	Sheet 1 of 1, Category Code 3A2, Page A1.7 of Volume 4 of the 2006 IPCC Guidelines	See Annex 10A.2, Tables 10A-4 to 10A-8, Volume 4 of 2006 Guidelines, for derivation of these emission factors	2006 IPCC Guidelines for National Greenhouse Gas Inventories, Volume 4, Table 10.14 - Manure management methane emission factors by temperature for Cattle, Swine, and Buffalo, on page 10.38	IPCC	10	1.14155	Component	AFOLU
[truncated: 572 more rows]
