# Supplementary material for: Controlled release testing of the static chamber methodology for direct measurements of methane emissions
Source: Copernicus journal article supplement (doi:10.5194/amt-2023-27), 2023-03-13
Supplement: Supplementary file 3 [file 20230209_IPCC_EmissionFactors_Energy_AMT.xlsx]

## Sheet: Methane_Flowrates_NG
EF ID	IPCC 1996 Source/Sink Category	IPCC 2006 Source/Sink Category	Gas	Fuel 1996	Fuel 2006	Type of parameter	Description	Technologies / Practices	Parameters / Conditions	Region / Regional Conditions	Abatement / Control Technologies	Other properties	Value	Unit	Equation	IPCC Worksheet	Technical Reference	Source of data	Data provider	Value_2	EF_g_hour	Scale	Source				Flowback duration from SI of Allen et al. (link: https://www.pnas.org/doi/10.1073/pnas.1304880110#supplementary-materials)
17736	1A3b - Road Transportation	1.A.3.b - Road Transportation	METHANE	Bio-Alcohol	Bio-Alcohol	1996 IPCC default	Estimated emission factors for US Light- and Heavy- Duty Methanol Vehicles	Advanced Control: Passenger Cars (M85 Fuel)	In the Revised 1996 IPCC Guidelines, the fuel type is specified as "methanol".				0.02	g/km		Not Applicable		Revised 1996 IPCC Guidelines for National Greenhouse Gas Inventories ( Table 1-46 on Page 1.88) of the Reference Manual (Estimated Emission Factors for US Light- and Heavy- Duty Methanol Vehicles)	IPCC	0.02	0.0212341	Component	NG	9300.52	Average annual distance driven based on International Comparisons	https://internationalcomparisons.org/environmental/transportation/	62.5
17754	1A3b - Road Transportation	1.A.3.b - Road Transportation	METHANE	Bio-Alcohol	Bio-Alcohol	1996 IPCC default	Estimated emission factors for US Heavy- Duty Methanol Vehicles	Advanced Control: Heavy-Duty Vehicles - Methanol-Diesel Engines - M100 Fuel	In the Revised 1996 IPCC Guidelines, the fuel type is specified as "methanol".				0.1	g/km		Not Applicable		Revised 1996 IPCC Guidelines for National Greenhouse Gas Inventories ( Table 1-46 on Page 1.88) of the Reference Manual (Estimated Emission Factors for US Heavy- Duty Methanol Vehicles)	IPCC	0.1	0.10617	Component	NG	80.8556	Average flowback duration (hours)		37.8
18635	1A3b - Road Transportation	1.A.3.b - Road Transportation	METHANE	Motor Gasoline	Motor Gasoline	1996 IPCC default	Estimated emission factors for US Gasoline Passengers Cars	Low-Emission Vehicle Technology		Not Applicable			0.02 -0.03	g/km		Not Applicable		Revised 1996 IPCC Guidelines for National Greenhouse Gas Inventories ( Table 1-27 on Page 1.70) of the Reference Manual (Estimated Emission Factors for US Gasoline Passenger Cars)	IPCC	0.02	0.0212341	Component	NG	1.12	Average duration of manual liquid unloading in hours by Allen et al. (link: https://www.pnas.org/doi/10.1073/pnas.1304880110#supplementary-materials)		12.5
18653	1A3b - Road Transportation	1.A.3.b - Road Transportation	METHANE	Motor Gasoline	Motor Gasoline	1996 IPCC default	Estimated emission factors for US Gasoline Passengers Cars	Three-Way Catalyst Control		Not Applicable			0.03	g/km		Not Applicable		Revised 1996 IPCC Guidelines for National Greenhouse Gas Inventories ( Table 1-27 on Page 1.70) of the Reference Manual (Estimated Emission Factors for US Gasoline Passenger Cars)	IPCC	0.03	0.0318511	Component	NG	19.1	Cubic feet of methane to grams		339.2
18671	1A3b - Road Transportation	1.A.3.b - Road Transportation	METHANE	Motor Gasoline	Motor Gasoline	1996 IPCC default	Estimated emission factors for US Gasoline Passengers Cars	Early Three-Way Catalyst Control		Not Applicable			0.03 - 0.05	g/km		Not Applicable		Revised 1996 IPCC Guidelines for National Greenhouse Gas Inventories ( Table 1-27 on Page 1.70) of the Reference Manual (Estimated Emission Factors for US Gasoline Passenger Cars)	IPCC	0.04	0.0424681	Component	NG	24	CO2 GWP		228
18689	1A3b - Road Transportation	1.A.3.b - Road Transportation	METHANE	Motor Gasoline	Motor Gasoline	1996 IPCC default	Estimated emission factors for US Gasoline Passengers Cars	Oxidation Catalyst		Not Applicable			0.06 - 0.08	g/km		Not Applicable		Revised 1996 IPCC Guidelines for National Greenhouse Gas Inventories ( Table 1-27 on Page 1.70) of the Reference Manual (Estimated Emission Factors for US Gasoline Passenger Cars)	IPCC	0.07	0.0743192	Component	NG				74.9
18707	1A3b - Road Transportation	1.A.3.b - Road Transportation	METHANE	Motor Gasoline	Motor Gasoline	1996 IPCC default	Estimated emission factors for US Gasoline Passengers Cars	Non-Catalyst Control		Not Applicable			0.11 - 0.13	g/km		Not Applicable		Revised 1996 IPCC Guidelines for National Greenhouse Gas Inventories ( Table 1-27 on Page 1.70) of the Reference Manual (Estimated Emission Factors for US Gasoline Passenger Cars)	IPCC	0.12	0.127404	Component	NG				74.9
18725	1A3b - Road Transportation	1.A.3.b - Road Transportation	METHANE	Motor Gasoline	Motor Gasoline	1996 IPCC default	Estimated emission factors for US Gasoline Passengers Cars	Uncontrolled		Not Applicable			0.13 -0.14	g/km		Not Applicable		Revised 1996 IPCC Guidelines for National Greenhouse Gas Inventories ( Table 1-27 on Page 1.70) of the Reference Manual (Estimated Emission Factors for US Gasoline Passenger Cars)	IPCC	0.135	0.14333	Component	NG				28
18743	1A3b - Road Transportation	1.A.3.b - Road Transportation	METHANE	Motor Gasoline	Motor Gasoline	1996 IPCC default	Estimated emission factors for US Light-Duty Gasoline Trucks	Low-Emission Vehicle Technology		Not Applicable			0.02 - 0.04	g/km		Not Applicable		Revised 1996 IPCC Guidelines for National Greenhouse Gas Inventories ( Table 1-28 on Page 1.71) of the Reference Manual (Estimated Emission Factors for US Light-duty Gasoline Trucks)	IPCC	0.03	0.0318511	Component	NG				27.9
18761	1A3b - Road Transportation	1.A.3.b - Road Transportation	METHANE	Motor Gasoline	Motor Gasoline	1996 IPCC default	Estimated emission factors for US Light-Duty Gasoline Trucks	Three-Way Catalyst Control		Not Applicable			0.03 - 0.04	g/km		Not Applicable		Revised 1996 IPCC Guidelines for National Greenhouse Gas Inventories ( Table 1-28 on Page 1.71) of the Reference Manual (Estimated Emission Factors for US Light-duty Gasoline Trucks)	IPCC	0.035	0.0371596	Component	NG				13.8
18779	1A3b - Road Transportation	1.A.3.b - Road Transportation	METHANE	Motor Gasoline	Motor Gasoline	1996 IPCC default	Estimated emission factors for US Light-Duty Gasoline Trucks	Early Three-Way Catalyst Control		Not Applicable			0.06 - 0.08	g/km		Not Applicable		Revised 1996 IPCC Guidelines for National Greenhouse Gas Inventories ( Table 1-28 on Page 1.71) of the Reference Manual (Estimated Emission Factors for US Light-duty Gasoline Trucks)	IPCC	0.07	0.0743192	Component	NG				164
18797	1A3b - Road Transportation	1.A.3.b - Road Transportation	METHANE	Motor Gasoline	Motor Gasoline	1996 IPCC default	Estimated emission factors for US Light-Duty Gasoline Trucks	Oxidation Catalyst		Not Applicable			0.08 - 0.10	g/km		Not Applicable		Revised 1996 IPCC Guidelines for National Greenhouse Gas Inventories ( Table 1-28 on Page 1.71) of the Reference Manual (Estimated Emission Factors for US Light-duty Gasoline Trucks)	IPCC	0.09	0.0955533	Component	NG				108
18815	1A3b - Road Transportation	1.A.3.b - Road Transportation	METHANE	Motor Gasoline	Motor Gasoline	1996 IPCC default	Estimated emission factors for US Light-Duty Gasoline Trucks	Non-Catalyst		Not Applicable			0.13 - 0.15	g/km		Not Applicable		Revised 1996 IPCC Guidelines for National Greenhouse Gas Inventories ( Table 1-28 on Page 1.71) of the Reference Manual (Estimated Emission Factors for US Light-duty Gasoline Trucks)	IPCC	0.14	0.148638	Component	NG				144.7
18833	1A3b - Road Transportation	1.A.3.b - Road Transportation	METHANE	Motor Gasoline	Motor Gasoline	1996 IPCC default	Estimated emission factors for US Light-Duty Gasoline Trucks	Uncontrolled		Not Applicable			0.13 - 0.14	g/km		Not Applicable		Revised 1996 IPCC Guidelines for National Greenhouse Gas Inventories ( Table 1-28 on Page 1.71) of the Reference Manual (Estimated Emission Factors for US Light-duty Gasoline Trucks)	IPCC	0.135	0.14333	Component	NG				147.2
18851	1A3b - Road Transportation	1.A.3.b - Road Transportation	METHANE	Motor Gasoline	Motor Gasoline	1996 IPCC default	Estimated emission factors for US Heavy-Duty Gasoline Vehicles	Three-Way Catalyst Control		Not Applicable			0.07 - 0.08	g/km		Not Applicable		Revised 1996 IPCC Guidelines for National Greenhouse Gas Inventories ( Table 1-29 on Page 1.72) of the Reference Manual (Estimated Emission Factors for US Heavy-Duty Gasoline Vehicles)	IPCC	0.075	0.0796277	Component	NG				138
18869	1A3b - Road Transportation	1.A.3.b - Road Transportation	METHANE	Motor Gasoline	Motor Gasoline	1996 IPCC default	Estimated emission factors for US Heavy-Duty Gasoline Vehicles	Non-Catalyst Control		Not Applicable			0.12 - 0.13	g/km		Not Applicable		Revised 1996 IPCC Guidelines for National Greenhouse Gas Inventories ( Table 1-29 on Page 1.72) of the Reference Manual (Estimated Emission Factors for US Heavy-Duty Gasoline Vehicles)	IPCC	0.125	0.132713	Component	NG				138
18887	1A3b - Road Transportation	1.A.3.b - Road Transportation	METHANE	Motor Gasoline	Motor Gasoline	1996 IPCC default	Estimated emission factors for US Heavy-Duty Gasoline Vehicles	Uncontrolled		Not Applicable			0.25 - 0.29	g/km		Not Applicable		Revised 1996 IPCC Guidelines for National Greenhouse Gas Inventories ( Table 1-29 on Page 1.72) of the Reference Manual (Estimated Emission Factors for US Heavy-Duty Gasoline Vehicles)	IPCC	0.27	0.28666	Component	NG				138
18905	1A3b - Road Transportation	1.A.3.b - Road Transportation	METHANE	Diesel Oil	Diesel Oil	1996 IPCC default	Estimated emission factors for US Diesel Passenger Cars	Advanced Control		Not Applicable			0.01	g/km		Not Applicable		Revised 1996 IPCC Guidelines for National Greenhouse Gas Inventories ( Table 1-30 on Page 1.73) of the Reference Manual (Estimated Emission Factors for US Diesel Passenger Cars)	IPCC	0.01	0.010617	Component	NG				30.2
18923	1A3b - Road Transportation	1.A.3.b - Road Transportation	METHANE	Diesel Oil	Diesel Oil	1996 IPCC default	Estimated emission factors for US Diesel Passenger Cars	Moderate Control		Not Applicable			0.01	g/km		Not Applicable		Revised 1996 IPCC Guidelines for National Greenhouse Gas Inventories ( Table 1-30 on Page 1.73) of the Reference Manual (Estimated Emission Factors for US Diesel Passenger Cars)	IPCC	0.01	0.010617	Component	NG				30.1
18941	1A3b - Road Transportation	1.A.3.b - Road Transportation	METHANE	Diesel Oil	Diesel Oil	1996 IPCC default	Estimated emission factors for US Diesel Passenger Cars	Uncontrolled		Not Applicable			0.01	g/km		Not Applicable		Revised 1996 IPCC Guidelines for National Greenhouse Gas Inventories ( Table 1-30 on Page 1.73) of the Reference Manual (Estimated Emission Factors for US Diesel Passenger Cars)	IPCC	0.01	0.010617	Component	NG				44.5
18959	1A3b - Road Transportation	1.A.3.b - Road Transportation	METHANE	Diesel Oil	Diesel Oil	1996 IPCC default	Estimated emission factors for US Light-Duty Diesel Trucks	Advanced Control		Not Applicable			0.01	g/km		Not Applicable		Revised 1996 IPCC Guidelines for National Greenhouse Gas Inventories ( Table 1-31 on Page 1.74) of the Reference Manual (Estimated Emission Factors for US Light - Duty Diesel Trucks)	IPCC	0.01	0.010617	Component	NG				34.3
18977	1A3b - Road Transportation	1.A.3.b - Road Transportation	METHANE	Diesel Oil	Diesel Oil	1996 IPCC default	Estimated emission factors for US Light-Duty Diesel Trucks	Moderate Control		Not Applicable			0.01	g/km		Not Applicable		Revised 1996 IPCC Guidelines for National Greenhouse Gas Inventories ( Table 1-31 on Page 1.74) of the Reference Manual (Estimated Emission Factors for US Light - Duty Diesel Trucks)	IPCC	0.01	0.010617	Component	NG				68.4
18995	1A3b - Road Transportation	1.A.3.b - Road Transportation	METHANE	Diesel Oil	Diesel Oil	1996 IPCC default	Estimated emission factors for US Light-Duty Diesel Trucks	Uncontrolled		Not Applicable			0.01	g/km		Not Applicable		Revised 1996 IPCC Guidelines for National Greenhouse Gas Inventories ( Table 1-31 on Page 1.74) of the Reference Manual (Estimated Emission Factors for US Light - Duty Diesel Trucks)	IPCC	0.01	0.010617	Component	NG				23.7
19013	1A3b - Road Transportation	1.A.3.b - Road Transportation	METHANE	Diesel Oil	Diesel Oil	1996 IPCC default	Estimated emission factors for US Heavy Duty Diesel Vehicles	Advanced Control		Not Applicable			0.04	g/km		Not Applicable		Revised 1996 IPCC Guidelines for National Greenhouse Gas Inventories ( Table 1-32 on Page 1.75) of the Reference Manual (Estimated Emission Factors for US Heavy Duty Diesel Vehicles )	IPCC	0.04	0.0424681	Component	NG				4.8
19031	1A3b - Road Transportation	1.A.3.b - Road Transportation	METHANE	Diesel Oil	Diesel Oil	1996 IPCC default	Estimated emission factors for US Heavy Duty Diesel Vehicles	Moderate Control		Not Applicable			0.05	g/km		Not Applicable		Revised 1996 IPCC Guidelines for National Greenhouse Gas Inventories ( Table 1-32 on Page 1.75) of the Reference Manual (Estimated Emission Factors for US Heavy Duty Diesel Vehicles )	IPCC	0.05	0.0530852	Component	NG				15.1
19049	1A3b - Road Transportation	1.A.3.b - Road Transportation	METHANE	Diesel Oil	Diesel Oil	1996 IPCC default	Estimated emission factors for US Heavy Duty Diesel Vehicles	Uncontrolled		Not Applicable			0.06	g/km		Not Applicable		Revised 1996 IPCC Guidelines for National Greenhouse Gas Inventories ( Table 1-32 on Page 1.75) of the Reference Manual (Estimated Emission Factors for US Heavy Duty Diesel Vehicles )	IPCC	0.06	0.0637022	Component	NG				20.5
19067	1A3b - Road Transportation	1.A.3.b - Road Transportation	METHANE	Motor Gasoline	Motor Gasoline	1996 IPCC default	Estimated emission factors for US Motorcycles	Non-catalytic Control		Not Applicable			0.13	g/km		Not Applicable		Revised 1996 IPCC Guidelines for National Greenhouse Gas Inventories ( Table 1-33 on Page 1.75) of the Reference Manual (Estimated Emission Factors for US Motorcycles )	IPCC	0.13	0.138021	Component	NG				34.1
19085	1A3b - Road Transportation	1.A.3.b - Road Transportation	METHANE	Motor Gasoline	Motor Gasoline	1996 IPCC default	Estimated emission factors for US Motorcycles	Uncontrolled		Not Applicable			0.26	g/km		Not Applicable		Revised 1996 IPCC Guidelines for National Greenhouse Gas Inventories ( Table 1-33 on Page 1.75) of the Reference Manual (Estimated Emission Factors for US Motorcycles )	IPCC	0.26	0.276043	Component	NG
19103	1A3b - Road Transportation	1.A.3.b - Road Transportation	METHANE	Motor Gasoline	Motor Gasoline	1996 IPCC default	Estimated emission factors for European Gasoline Passenger Cars	Uncontrolled		Not Applicable			0.07	g/km		Not Applicable		Revised 1996 IPCC Guidelines for National Greenhouse Gas Inventories ( Table 1-36 on Page 1.81) of the Reference Manual (Estimated Emission Factors for European Gasoline Passenger Cars )	IPCC	0.07	0.0743192	Component	NG		Driving distance (km) per capita	Population	Driving distance * Population
19121	1A3b - Road Transportation	1.A.3.b - Road Transportation	METHANE	Motor Gasoline	Motor Gasoline	1996 IPCC default	Estimated emission factors for European Gasoline Passenger Cars	Early non-catalyst Controls		Not Applicable			0.08	g/km		Not Applicable		Revised 1996 IPCC Guidelines for National Greenhouse Gas Inventories ( Table 1-36 on Page 1.81) of the Reference Manual (Estimated Emission Factors for European Gasoline Passenger Cars )	IPCC	0.08	0.0849363	Component	NG	Australia	10800	25499884	275398747200
19139	1A3b - Road Transportation	1.A.3.b - Road Transportation	METHANE	Motor Gasoline	Motor Gasoline	1996 IPCC default	Estimated emission factors for European Gasoline Passenger Cars	Non-catalyst Control		Not Applicable			0.07	g/km		Not Applicable		Revised 1996 IPCC Guidelines for National Greenhouse Gas Inventories ( Table 1-36 on Page 1.81) of the Reference Manual (Estimated Emission Factors for European Gasoline Passenger Cars )	IPCC	0.07	0.0743192	Component	NG	Canada	8500	37742154	320808309000
19157	1A3b - Road Transportation	1.A.3.b - Road Transportation	METHANE	Motor Gasoline	Motor Gasoline	1996 IPCC default	Estimated emission factors for European Gasoline Passenger Cars	Oxidation catalyst		Not Applicable			0.07	g/km		Not Applicable		Revised 1996 IPCC Guidelines for National Greenhouse Gas Inventories ( Table 1-36 on Page 1.81) of the Reference Manual (Estimated Emission Factors for European Gasoline Passenger Cars )	IPCC	0.07	0.0743192	Component	NG	Denmark	6300	5792202	36490872600
19175	1A3b - Road Transportation	1.A.3.b - Road Transportation	METHANE	Motor Gasoline	Motor Gasoline	1996 IPCC default	Estimated emission factors for European Gasoline Passenger Cars	Three-way catalyst		Not Applicable			0.02	g/km		Not Applicable		Revised 1996 IPCC Guidelines for National Greenhouse Gas Inventories ( Table 1-36 on Page 1.81) of the Reference Manual (Estimated Emission Factors for European Gasoline Passenger Cars )	IPCC	0.02	0.0212341	Component	NG	France	6250	65273511	407959443750
19193	1A3b - Road Transportation	1.A.3.b - Road Transportation	METHANE	Motor Gasoline	Motor Gasoline	1996 IPCC default	Estimated emission factors for European Gasoline Passenger Cars	Two-stroke		Not Applicable			0.08	g/km		Not Applicable		Revised 1996 IPCC Guidelines for National Greenhouse Gas Inventories ( Table 1-36 on Page 1.81) of the Reference Manual (Estimated Emission Factors for European Gasoline Passenger Cars )	IPCC	0.08	0.0849363	Component	NG	Germany	7000	83783942	586487594000
19211	1A3b - Road Transportation	1.A.3.b - Road Transportation	METHANE	Diesel Oil	Diesel Oil	1996 IPCC default	Estimated emission factors for European Diesel Passenger Cars	Moderate Control		Not Applicable			0.005	g/km		Not Applicable		Revised 1996 IPCC Guidelines for National Greenhouse Gas Inventories ( Table 1-37 on Page 1.82) of the Reference Manual (Estimated Emission Factors for European Diesel Passenger Cars )	IPCC	0.005	0.00530852	Component	NG	Italy	6250	60461826	377886412500
19229	1A3b - Road Transportation	1.A.3.b - Road Transportation	METHANE	Diesel Oil	Diesel Oil	1996 IPCC default	Estimated emission factors for European Diesel Light-Duty Vehicles	Moderate Control		Not Applicable			0.005	g/km		Not Applicable		Revised 1996 IPCC Guidelines for National Greenhouse Gas Inventories ( Table 1-38 on Page 1.82) of the Reference Manual (Estimated Emission Factors for European Diesel Ligth-Duty Vehicles )	IPCC	0.005	0.00530852	Component	NG	Japan	4000	126476461	505905844000
19247	1A3b - Road Transportation	1.A.3.b - Road Transportation	METHANE	Diesel Oil	Diesel Oil	1996 IPCC default	Estimated emission factors for European Diesel Heavy-Duty Vehicles	Moderate Control		Not Applicable			0.06	g/km		Not Applicable		Revised 1996 IPCC Guidelines for National Greenhouse Gas Inventories ( Table 1-39 on Page 1.82) of the Reference Manual (Estimated Emission Factors for European Diesel Heavy-Duty Vehicles )	IPCC	0.06	0.0637022	Component	NG	Netherlands	6150	17134872	105379462800
19265	1A3b - Road Transportation	1.A.3.b - Road Transportation	METHANE	Motor Gasoline	Motor Gasoline	1996 IPCC default	Estimated emission factors for European Gasoline Light-Duty Vehicles	Moderate Control		Not Applicable			0.08	g/km		Not Applicable		Revised 1996 IPCC Guidelines for National Greenhouse Gas Inventories ( Table 1-40 on Page 1.83) of the Reference Manual (Estimated Emission Factors for European Gasoline Light-Duty Vehicles )	IPCC	0.08	0.0849363	Component	NG	Norway	6500	5421241	35238066500
19283	1A3b - Road Transportation	1.A.3.b - Road Transportation	METHANE	Motor Gasoline	Motor Gasoline	1996 IPCC default	Estimated emission factors for European Gasoline Heavy-Duty Vehicles	Uncontrolled		Not Applicable			0.1	g/km		Not Applicable		Revised 1996 IPCC Guidelines for National Greenhouse Gas Inventories ( Table 1-41 on Page 1.83) of the Reference Manual (Estimated Emission Factors for European Gasoline Heavy-Duty Vehicles )	IPCC	0.1	0.10617	Component	NG	Sweden	7000	10099265	70694855000
19301	1A3b - Road Transportation	1.A.3.b - Road Transportation	METHANE	Motor Gasoline	Motor Gasoline	1996 IPCC default	Estimated emission factors for European Motorcycles < 50cc	Uncontrolled: Assumed Fuel Economy 41.7 km/l		Not Applicable			0.1	g/km		Not Applicable		Revised 1996 IPCC Guidelines for National Greenhouse Gas Inventories ( Table 1-42 on Page 1.83) of the Reference Manual (Estimated Emission Factors for European Motorcycles < 50 cc).	IPCC	0.1	0.10617	Component	NG	United Kingdom	6250	67886011	424287568750
19319	1A3b - Road Transportation	1.A.3.b - Road Transportation	METHANE	Motor Gasoline	Motor Gasoline	1996 IPCC default	Estimated emission factors for European Motorcycles > 50cc 2 stroke	Uncontrolled: Assumed Fuel Economy 25.0 km/l		Not Applicable			0.15	g/km		Not Applicable		Revised 1996 IPCC Guidelines for National Greenhouse Gas Inventories ( Table 1-42 on Page 1.83) of the Reference Manual (Estimated Emission Factors for European Motorcycles > 50 cc 2 stroke).	IPCC	0.15	0.159255	Component	NG	United States	14000	331002651	4634037114000
19337	1A3b - Road Transportation	1.A.3.b - Road Transportation	METHANE	Motor Gasoline	Motor Gasoline	1996 IPCC default	Estimated emission factors for European Motorcycles >50cc 4 stroke	Uncontrolled: Assumed Fuel Economy 19.6 km/l		Not Applicable			0.2	g/km		Not Applicable		Revised 1996 IPCC Guidelines for National Greenhouse Gas Inventories ( Table 1-42 on Page 1.83) of the Reference Manual (Estimated Emission Factors for European Motorcycles > 50 cc 4 stroke).	IPCC	0.2	0.212341	Component	NG
19355	1A3b - Road Transportation	1.A.3.b - Road Transportation	METHANE	Natural Gas	Natural Gas	1996 IPCC default	Estimated emission factors for US Light - and Heavy - Duty Natural Gas Vehicles (Passenger Cars)	Advanced Control: Assumed Fuel Economy: 14.9 km/m3		Not Applicable		0	0.7	g/km		Not Applicable		Revised 1996 IPCC Guidelines for National Greenhouse Gas Inventories ( Table 1-43 on Page 1.86) of the Reference Manual (Estimated Emission Factors for US Light - and Heavy - Duty Natural Gas Vehicles).	IPCC	0.7	0.743192	Component	NG
19370	1A3b - Road Transportation	1.A.3.b - Road Transportation	METHANE	Natural Gas	Natural Gas	1996 IPCC default	Estimated emission factors for US Light - and Heavy - Duty Natural Gas Vehicles (Passenger Cars)	Uncontrolled: Assumed Fuel Economy: 6.5 km/m3		Not Applicable			3.5	g/km		Not Applicable		Revised 1996 IPCC Guidelines for National Greenhouse Gas Inventories ( Table 1-43 on Page 1.86) of the Reference Manual (Estimated Emission Factors for US Light - and Heavy - Duty Natural Gas Vehicles).	IPCC	3.5	3.71596	Component	NG	Average per capita driving distance	9300.52
19385	1A3b - Road Transportation	1.A.3.b - Road Transportation	METHANE	Natural Gas	Natural Gas	1996 IPCC default	Estimated emission factors for US Heavy - Duty Vehicles: Stochiometric Engine (compare with gasoline)	Advanced Control: Assumed Fuel Economy: 3.6 km/m3		Not Applicable			3	g/km		Not Applicable		Revised 1996 IPCC Guidelines for National Greenhouse Gas Inventories ( Table 1-43 on Page 1.86) of the Reference Manual (Estimated Emission Factors for US Light - and Heavy - Duty Natural Gas Vehicles).	IPCC	3	3.18511	Component	NG
19400	1A3b - Road Transportation	1.A.3.b - Road Transportation	METHANE	Natural Gas	Natural Gas	1996 IPCC default	Estimated emission factors for US Heavy - Duty Vehicles: Stochiometric Engine (compare with gasoline)	Uncontrolled: Assumed Fuel Economy:2.2 km/m3		Not Applicable			10	g/km		Not Applicable		Revised 1996 IPCC Guidelines for National Greenhouse Gas Inventories ( Table 1-43 on Page 1.86) of the Reference Manual (Estimated Emission Factors for US Light - and Heavy - Duty Natural Gas Vehicles).	IPCC	10	10.617	Component	NG
19415	1A3b - Road Transportation	1.A.3.b - Road Transportation	METHANE	Natural Gas	Natural Gas	1996 IPCC default	Estimated emission factors for US Heavy - Duty Vehicles: Lean Burn Engine (compare with diesel)	Advanced Control: Assumed Fuel Economy: 2.4 km/m3		Not Applicable			4	g/km		Not Applicable		Revised 1996 IPCC Guidelines for National Greenhouse Gas Inventories ( Table 1-43 on Page 1.86) of the Reference Manual (Estimated Emission Factors for US Light - and Heavy - Duty Natural Gas Vehicles).	IPCC	4	4.24681	Component	NG
19430	1A3b - Road Transportation	1.A.3.b - Road Transportation	METHANE	Natural Gas	Natural Gas	1996 IPCC default	Estimated emission factors for US Heavy - Duty Vehicles: Lean Burn Engine (compare with diesel)	Uncontrolled: Assumed Fuel Economy:2.0 km/m3		Not Applicable			10	g/km		Not Applicable		Revised 1996 IPCC Guidelines for National Greenhouse Gas Inventories ( Table 1-43 on Page 1.86) of the Reference Manual (Estimated Emission Factors for US Light - and Heavy - Duty Natural Gas Vehicles).	IPCC	10	10.617	Component	NG
19445	1A3b - Road Transportation	1.A.3.b - Road Transportation	METHANE	Liquefied Petroleum Gas (LPG)	Liquefied Petroleum Gases	1996 IPCC default	Estimated emission factors for US Light- and Heavy- Duty LPG Vehicles (Passenger Cars)	Advanced Control		Not Applicable			0.03	g/km		Not Applicable		Revised 1996 IPCC Guidelines for National Greenhouse Gas Inventories ( Table 1-44 on Page 1.87) of the Reference Manual (Estimated Emission Factors for US Light- and Heavy- Duty LPG Vehicles)	IPCC	0.03	0.0318511	Component	NG
19460	1A3b - Road Transportation	1.A.3.b - Road Transportation	METHANE	Liquefied Petroleum Gas (LPG)	Liquefied Petroleum Gases	1996 IPCC default	Estimated emission factors for US Light- and Heavy- Duty LPG Vehicles (Passenger Cars)	Uncontrolled		Not Applicable			0.18	g/km		Not Applicable		Revised 1996 IPCC Guidelines for National Greenhouse Gas Inventories ( Table 1-44 on Page 1.87) of the Reference Manual (Estimated Emission Factors for US Light- and Heavy- Duty LPG Vehicles)	IPCC	0.18	0.191107	Component	NG
19475	1A3b - Road Transportation	1.A.3.b - Road Transportation	METHANE	Liquefied Petroleum Gas (LPG)	Liquefied Petroleum Gases	1996 IPCC default	Estimated emission factors for US Light- and Heavy- Duty LPG Vehicles (Passenger Cars): Stoichiometric engine (compare with gasoline)	Advanced Control		Not Applicable			0.15	g/km		Not Applicable	Berdowski, et al (1993a) suggests a CH4 emission factor of 0.013 g/MJ for this vehicle/technology class.	Revised 1996 IPCC Guidelines for National Greenhouse Gas Inventories ( Table 1-44 on Page 1.87) of the Reference Manual (Estimated Emission Factors for US Light- and Heavy- Duty LPG Vehicles)	IPCC	0.15	0.159255	Component	NG
19490	1A3b - Road Transportation	1.A.3.b - Road Transportation	METHANE	Liquefied Petroleum Gas (LPG)	Liquefied Petroleum Gases	1996 IPCC default	Estimated emission factors for US Light- and Heavy- Duty LPG Vehicles (Passenger Cars): Stoichiometric engine (compare with gasoline)	Uncontrolled		Not Applicable			0.4	g/km		Not Applicable	Berdowski, et al (1993a) suggests a CH4 emission factor of 0.013 g/MJ for this vehicle/technology class.	Revised 1996 IPCC Guidelines for National Greenhouse Gas Inventories ( Table 1-44 on Page 1.87) of the Reference Manual (Estimated Emission Factors for US Light- and Heavy- Duty LPG Vehicles)	IPCC	0.4	0.424681	Component	NG
19505	1A3b - Road Transportation	1.A.3.b - Road Transportation	METHANE	Liquefied Petroleum Gas (LPG)	Liquefied Petroleum Gases	1996 IPCC default	Estimated emission factors for European LPG Passenger Cars	Moderate Control: Assumed Fuel Economy 8.9km/l (under 5 bar pressure).		Not Applicable			0.06	g/km		Not Applicable		Revised 1996 IPCC Guidelines for National Greenhouse Gas Inventories ( Table 1-45 on Page 1.87) of the Reference Manual (Estimated Emission Factors for European LPG Passenger Cars)	IPCC	0.06	0.0637022	Component	NG
118661	1A3b1 - Cars	1.A.3.b.i - Cars	METHANE	Motor Gasoline	Motor Gasoline	2006 IPCC default	Emission Factor for USA Vehicles	Light Duty Gasoline Vehicle (Car)	Running - (hot)		Low Emission Vehicle (LEV)		6	mg/km	Equation 3.2.5 in Volume 2 of the 2006 IPCC Guidelines for National Greenhouse Gas Inventories		USEPA (2004). "Update of methane and nitrous oxide emission factors for on-highway vehicles." Report Number EPA420-P-04-016, US Environmental Protection Agency, Washington DC, USA .November 2004	2006 IPCC Guidelines for National Greenhouse Gas Inventories, Volume 2: Energy, Table 3.2.3	IPCC	6	0.00637022	Component	NG
118662	1A3b1 - Cars	1.A.3.b.i - Cars	METHANE	Motor Gasoline	Motor Gasoline	2006 IPCC default	Emission Factor for USA Vehicles	Light Duty Gasoline Vehicle (Car)	Running - (hot)		Advanced Three-Way Catalyst		7	mg/km	Equation 3.2.5 in Volume 2 of the 2006 IPCC Guidelines for National Greenhouse Gas Inventories		USEPA (2004). "Update of methane and nitrous oxide emission factors for on-highway vehicles." Report Number EPA420-P-04-016, US Environmental Protection Agency, Washington DC, USA .November 2004	2006 IPCC Guidelines for National Greenhouse Gas Inventories, Volume 2: Energy, Table 3.2.3	IPCC	7	0.00743192	Component	NG
118663	1A3b1 - Cars	1.A.3.b.i - Cars	METHANE	Motor Gasoline	Motor Gasoline	2006 IPCC default	Emission Factor for USA Vehicles	Light Duty Gasoline Vehicle (Car)	Running - (hot)		Early Three-Way Catalyst		39	mg/km	Equation 3.2.5 in Volume 2 of the 2006 IPCC Guidelines for National Greenhouse Gas Inventories		USEPA (2004). "Update of methane and nitrous oxide emission factors for on-highway vehicles." Report Number EPA420-P-04-016, US Environmental Protection Agency, Washington DC, USA .November 2004	2006 IPCC Guidelines for National Greenhouse Gas Inventories, Volume 2: Energy, Table 3.2.3	IPCC	39	0.0414064	Component	NG
118664	1A3b1 - Cars	1.A.3.b.i - Cars	METHANE	Motor Gasoline	Motor Gasoline	2006 IPCC default	Emission Factor for USA Vehicles	Light Duty Gasoline Vehicle (Car)	Running - (hot)		Oxidation Catalyst		82	mg/km	Equation 3.2.5 in Volume 2 of the 2006 IPCC Guidelines for National Greenhouse Gas Inventories		USEPA (2004). "Update of methane and nitrous oxide emission factors for on-highway vehicles." Report Number EPA420-P-04-016, US Environmental Protection Agency, Washington DC, USA .November 2004	2006 IPCC Guidelines for National Greenhouse Gas Inventories, Volume 2: Energy, Table 3.2.3	IPCC	82	0.0870597	Component	NG
118665	1A3b1 - Cars	1.A.3.b.i - Cars	METHANE	Motor Gasoline	Motor Gasoline	2006 IPCC default	Emission Factor for USA Vehicles	Light Duty Gasoline Vehicle (Car)	Running - (hot)		Non-oxidation Catalyst		96	mg/km	Equation 3.2.5 in Volume 2 of the 2006 IPCC Guidelines for National Greenhouse Gas Inventories		USEPA (2004). "Update of methane and nitrous oxide emission factors for on-highway vehicles." Report Number EPA420-P-04-016, US Environmental Protection Agency, Washington DC, USA .November 2004	2006 IPCC Guidelines for National Greenhouse Gas Inventories, Volume 2: Energy, Table 3.2.3	IPCC	96	0.101924	Component	NG
118666	1A3b1 - Cars	1.A.3.b.i - Cars	METHANE	Motor Gasoline	Motor Gasoline	2006 IPCC default	Emission Factor for USA Vehicles	Light Duty Gasoline Vehicle (Car)	Running - (hot)		Uncontrolled		101	mg/km	Equation 3.2.5 in Volume 2 of the 2006 IPCC Guidelines for National Greenhouse Gas Inventories		USEPA (2004). "Update of methane and nitrous oxide emission factors for on-highway vehicles." Report Number EPA420-P-04-016, US Environmental Protection Agency, Washington DC, USA .November 2004	2006 IPCC Guidelines for National Greenhouse Gas Inventories, Volume 2: Energy, Table 3.2.3	IPCC	101	0.107232	Component	NG
118667	1A3b1 - Cars	1.A.3.b.i - Cars	METHANE	Motor Gasoline	Motor Gasoline	2006 IPCC default	Emission Factor for USA Vehicles	Light Duty Gasoline Vehicle (Car)	Cold Start		Low Emission Vehicle (LEV)		32	mg/start	Equation 3.2.5 in Volume 2 of the 2006 IPCC Guidelines for National Greenhouse Gas Inventories		USEPA (2004). "Update of methane and nitrous oxide emission factors for on-highway vehicles." Report Number EPA420-P-04-016, US Environmental Protection Agency, Washington DC, USA .November 2004	2006 IPCC Guidelines for National Greenhouse Gas Inventories, Volume 2: Energy, Table 3.2.3	IPCC	32	0.032	Component	NG
118668	1A3b1 - Cars	1.A.3.b.i - Cars	METHANE	Motor Gasoline	Motor Gasoline	2006 IPCC default	Emission Factor for USA Vehicles	Light Duty Gasoline Vehicle (Car)	Cold Start		Advanced Three-Way Catalyst		55	mg/start	Equation 3.2.5 in Volume 2 of the 2006 IPCC Guidelines for National Greenhouse Gas Inventories		USEPA (2004). "Update of methane and nitrous oxide emission factors for on-highway vehicles." Report Number EPA420-P-04-016, US Environmental Protection Agency, Washington DC, USA .November 2004	2006 IPCC Guidelines for National Greenhouse Gas Inventories, Volume 2: Energy, Table 3.2.3	IPCC	55	0.055	Component	NG
118669	1A3b1 - Cars	1.A.3.b.i - Cars	METHANE	Motor Gasoline	Motor Gasoline	2006 IPCC default	Emission Factor for USA Vehicles	Light Duty Gasoline Vehicle (Car)	Cold Start		Early Three-Way Catalyst		34	mg/start	Equation 3.2.5 in Volume 2 of the 2006 IPCC Guidelines for National Greenhouse Gas Inventories		USEPA (2004). "Update of methane and nitrous oxide emission factors for on-highway vehicles." Report Number EPA420-P-04-016, US Environmental Protection Agency, Washington DC, USA .November 2004	2006 IPCC Guidelines for National Greenhouse Gas Inventories, Volume 2: Energy, Table 3.2.3	IPCC	34	0.034	Component	NG
118670	1A3b1 - Cars	1.A.3.b.i - Cars	METHANE	Motor Gasoline	Motor Gasoline	2006 IPCC default	Emission Factor for USA Vehicles	Light Duty Gasoline Vehicle (Car)	Cold Start		Oxidation Catalyst		9	mg/start	Equation 3.2.5 in Volume 2 of the 2006 IPCC Guidelines for National Greenhouse Gas Inventories		USEPA (2004). "Update of methane and nitrous oxide emission factors for on-highway vehicles." Report Number EPA420-P-04-016, US Environmental Protection Agency, Washington DC, USA .November 2004	2006 IPCC Guidelines for National Greenhouse Gas Inventories, Volume 2: Energy, Table 3.2.3	IPCC	9	0.009	Component	NG
118671	1A3b1 - Cars	1.A.3.b.i - Cars	METHANE	Motor Gasoline	Motor Gasoline	2006 IPCC default	Emission Factor for USA Vehicles	Light Duty Gasoline Vehicle (Car)	Cold Start		Non-oxidation Catalyst		59	mg/start	Equation 3.2.5 in Volume 2 of the 2006 IPCC Guidelines for National Greenhouse Gas Inventories		USEPA (2004). "Update of methane and nitrous oxide emission factors for on-highway vehicles." Report Number EPA420-P-04-016, US Environmental Protection Agency, Washington DC, USA .November 2004	2006 IPCC Guidelines for National Greenhouse Gas Inventories, Volume 2: Energy, Table 3.2.3	IPCC	59	0.059	Component	NG
118672	1A3b1 - Cars	1.A.3.b.i - Cars	METHANE	Motor Gasoline	Motor Gasoline	2006 IPCC default	Emission Factor for USA Vehicles	Light Duty Gasoline Vehicle (Car)	Cold Start		Uncontrolled		62	mg/start	Equation 3.2.5 in Volume 2 of the 2006 IPCC Guidelines for National Greenhouse Gas Inventories		USEPA (2004). "Update of methane and nitrous oxide emission factors for on-highway vehicles." Report Number EPA420-P-04-016, US Environmental Protection Agency, Washington DC, USA .November 2004	2006 IPCC Guidelines for National Greenhouse Gas Inventories, Volume 2: Energy, Table 3.2.3	IPCC	62	0.062	Component	NG
118673	1A3b1 - Cars	1.A.3.b.i - Cars	METHANE	Diesel Oil	Diesel Oil	2006 IPCC default	Emission Factor for USA Vehicles	Light Duty Diesel Vehicle (Car)	Running - (hot)		Advanced		1	mg/km	Relevant to Equation 3.2.5 in Volume 2 of the 2006 IPCC Guidelines for National Greenhouse Gas Inventories		USEPA (2004). "Update of methane and nitrous oxide emission factors for on-highway vehicles." Report Number EPA420-P-04-016, US Environmental Protection Agency, Washington DC, USA .November 2004	2006 IPCC Guidelines for National Greenhouse Gas Inventories, Volume 2: Energy, Table 3.2.3	IPCC	1	0.0010617	Component	NG
118674	1A3b1 - Cars	1.A.3.b.i - Cars	METHANE	Diesel Oil	Diesel Oil	2006 IPCC default	Emission Factor for USA Vehicles	Light Duty Diesel Vehicle (Car)	Running - (hot)		Moderate		1	mg/km	Relevant to Equation 3.2.5 in Volume 2 of the 2006 IPCC Guidelines for National Greenhouse Gas Inventories		USEPA (2004). "Update of methane and nitrous oxide emission factors for on-highway vehicles." Report Number EPA420-P-04-016, US Environmental Protection Agency, Washington DC, USA .November 2004	2006 IPCC Guidelines for National Greenhouse Gas Inventories, Volume 2: Energy, Table 3.2.3	IPCC	1	0.0010617	Component	NG
118675	1A3b1 - Cars	1.A.3.b.i - Cars	METHANE	Diesel Oil	Diesel Oil	2006 IPCC default	Emission Factor for USA Vehicles	Light Duty Diesel Vehicle (Car)	Running - (hot)		Uncontrolled		1	mg/km	Relevant to Equation 3.2.5 in Volume 2 of the 2006 IPCC Guidelines for National Greenhouse Gas Inventories		USEPA (2004). "Update of methane and nitrous oxide emission factors for on-highway vehicles." Report Number EPA420-P-04-016, US Environmental Protection Agency, Washington DC, USA .November 2004	2006 IPCC Guidelines for National Greenhouse Gas Inventories, Volume 2: Energy, Table 3.2.3	IPCC	1	0.0010617	Component	NG
118676	1A3b1 - Cars	1.A.3.b.i - Cars	METHANE	Diesel Oil	Diesel Oil	2006 IPCC default	Emission Factor for USA Vehicles	Light Duty Diesel Vehicle (Car)	Cold Start		Advanced		-3	mg/start	Relevant to Equation 3.2.5 in Volume 2 of the 2006 IPCC Guidelines for National Greenhouse Gas Inventories		USEPA (2004). "Update of methane and nitrous oxide emission factors for on-highway vehicles." Report Number EPA420-P-04-016, US Environmental Protection Agency, Washington DC, USA .November 2004	2006 IPCC Guidelines for National Greenhouse Gas Inventories, Volume 2: Energy, Table 3.2.3	IPCC	-3	-0.003	Component	NG
118677	1A3b1 - Cars	1.A.3.b.i - Cars	METHANE	Diesel Oil	Diesel Oil	2006 IPCC default	Emission Factor for USA Vehicles	Light Duty Diesel Vehicle (Car)	Cold Start		Moderate		-3	mg/start	Relevant to Equation 3.2.5 in Volume 2 of the 2006 IPCC Guidelines for National Greenhouse Gas Inventories		USEPA (2004). "Update of methane and nitrous oxide emission factors for on-highway vehicles." Report Number EPA420-P-04-016, US Environmental Protection Agency, Washington DC, USA .November 2004	2006 IPCC Guidelines for National Greenhouse Gas Inventories, Volume 2: Energy, Table 3.2.3	IPCC	-3	-0.003	Component	NG
118678	1A3b1 - Cars	1.A.3.b.i - Cars	METHANE	Diesel Oil	Diesel Oil	2006 IPCC default	Emission Factor for USA Vehicles	Light Duty Diesel Vehicle (Car)	Cold Start		Uncontrolled		-3	mg/start	Relevant to Equation 3.2.5 in Volume 2 of the 2006 IPCC Guidelines for National Greenhouse Gas Inventories		USEPA (2004). "Update of methane and nitrous oxide emission factors for on-highway vehicles." Report Number EPA420-P-04-016, US Environmental Protection Agency, Washington DC, USA .November 2004	2006 IPCC Guidelines for National Greenhouse Gas Inventories, Volume 2: Energy, Table 3.2.3	IPCC	-3	-0.003	Component	NG
118679	1A3b2 - Light Duty Trucks	1.A.3.b.ii - Light-duty trucks	METHANE	Motor Gasoline	Motor Gasoline	2006 IPCC default	Emission Factor for USA Vehicles	Light Duty Gasoline Truck	Running - (hot)		Low Emission Vehicle (LEV)		7	mg/km	Equation 3.2.5 in Volume 2 of the 2006 IPCC Guidelines for National Greenhouse Gas Inventories		USEPA (2004). "Update of methane and nitrous oxide emission factors for on-highway vehicles." Report Number EPA420-P-04-016, US Environmental Protection Agency, Washington DC, USA .November 2004	2006 IPCC Guidelines for National Greenhouse Gas Inventories, Volume 2: Energy, Table 3.2.3	IPCC	7	0.00743192	Component	NG
118680	1A3b2 - Light Duty Trucks	1.A.3.b.ii - Light-duty trucks	METHANE	Motor Gasoline	Motor Gasoline	2006 IPCC default	Emission Factor for USA Vehicles	Light Duty Gasoline Truck	Running - (hot)		Advanced Three-Way Catalyst		14	mg/km	Equation 3.2.5 in Volume 2 of the 2006 IPCC Guidelines for National Greenhouse Gas Inventories		USEPA (2004). "Update of methane and nitrous oxide emission factors for on-highway vehicles." Report Number EPA420-P-04-016, US Environmental Protection Agency, Washington DC, USA .November 2004	2006 IPCC Guidelines for National Greenhouse Gas Inventories, Volume 2: Energy, Table 3.2.3	IPCC	14	0.0148638	Component	NG
118681	1A3b2 - Light Duty Trucks	1.A.3.b.ii - Light-duty trucks	METHANE	Motor Gasoline	Motor Gasoline	2006 IPCC default	Emission Factor for USA Vehicles	Light Duty Gasoline Truck	Running - (hot)		Early Three-Way Catalyst		39	mg/km	Equation 3.2.5 in Volume 2 of the 2006 IPCC Guidelines for National Greenhouse Gas Inventories		USEPA (2004). "Update of methane and nitrous oxide emission factors for on-highway vehicles." Report Number EPA420-P-04-016, US Environmental Protection Agency, Washington DC, USA .November 2004	2006 IPCC Guidelines for National Greenhouse Gas Inventories, Volume 2: Energy, Table 3.2.3	IPCC	39	0.0414064	Component	NG
118682	1A3b2 - Light Duty Trucks	1.A.3.b.ii - Light-duty trucks	METHANE	Motor Gasoline	Motor Gasoline	2006 IPCC default	Emission Factor for USA Vehicles	Light Duty Gasoline Truck	Running - (hot)		Oxidation Catalyst		81	mg/km	Equation 3.2.5 in Volume 2 of the 2006 IPCC Guidelines for National Greenhouse Gas Inventories		USEPA (2004). "Update of methane and nitrous oxide emission factors for on-highway vehicles." Report Number EPA420-P-04-016, US Environmental Protection Agency, Washington DC, USA .November 2004	2006 IPCC Guidelines for National Greenhouse Gas Inventories, Volume 2: Energy, Table 3.2.3	IPCC	81	0.085998	Component	NG
118683	1A3b2 - Light Duty Trucks	1.A.3.b.ii - Light-duty trucks	METHANE	Motor Gasoline	Motor Gasoline	2006 IPCC default	Emission Factor for USA Vehicles	Light Duty Gasoline Truck	Running - (hot)		Non-oxidation Catalyst		109	mg/km	Equation 3.2.5 in Volume 2 of the 2006 IPCC Guidelines for National Greenhouse Gas Inventories		USEPA (2004). "Update of methane and nitrous oxide emission factors for on-highway vehicles." Report Number EPA420-P-04-016, US Environmental Protection Agency, Washington DC, USA .November 2004	2006 IPCC Guidelines for National Greenhouse Gas Inventories, Volume 2: Energy, Table 3.2.3	IPCC	109	0.115726	Component	NG
118684	1A3b2 - Light Duty Trucks	1.A.3.b.ii - Light-duty trucks	METHANE	Motor Gasoline	Motor Gasoline	2006 IPCC default	Emission Factor for USA Vehicles	Light Duty Gasoline Truck	Running - (hot)		Uncontrolled		116	mg/km	Equation 3.2.5 in Volume 2 of the 2006 IPCC Guidelines for National Greenhouse Gas Inventories		USEPA (2004). "Update of methane and nitrous oxide emission factors for on-highway vehicles." Report Number EPA420-P-04-016, US Environmental Protection Agency, Washington DC, USA .November 2004	2006 IPCC Guidelines for National Greenhouse Gas Inventories, Volume 2: Energy, Table 3.2.3	IPCC	116	0.123158	Component	NG
118685	1A3b2 - Light Duty Trucks	1.A.3.b.ii - Light-duty trucks	METHANE	Motor Gasoline	Motor Gasoline	2006 IPCC default	Emission Factor for USA Vehicles	Light Duty Gasoline Truck	Cold Start		Low Emission Vehicle (LEV)		46	mg/start	Relevant to Equation 3.2.5 in Volume 2 of the 2006 IPCC Guidelines for National Greenhouse Gas Inventories		USEPA (2004). "Update of methane and nitrous oxide emission factors for on-highway vehicles." Report Number EPA420-P-04-016, US Environmental Protection Agency, Washington DC, USA .November 2004	2006 IPCC Guidelines for National Greenhouse Gas Inventories, Volume 2: Energy, Table 3.2.3	IPCC	46	0.046	Component	NG
118686	1A3b2 - Light Duty Trucks	1.A.3.b.ii - Light-duty trucks	METHANE	Motor Gasoline	Motor Gasoline	2006 IPCC default	Emission Factor for USA Vehicles	Light Duty Gasoline Truck	Cold Start		Advanced Three-Way Catalyst		82	mg/start	Relevant to Equation 3.2.5 in Volume 2 of the 2006 IPCC Guidelines for National Greenhouse Gas Inventories		USEPA (2004). "Update of methane and nitrous oxide emission factors for on-highway vehicles." Report Number EPA420-P-04-016, US Environmental Protection Agency, Washington DC, USA .November 2004	2006 IPCC Guidelines for National Greenhouse Gas Inventories, Volume 2: Energy, Table 3.2.3	IPCC	82	0.082	Component	NG
118687	1A3b2 - Light Duty Trucks	1.A.3.b.ii - Light-duty trucks	METHANE	Motor Gasoline	Motor Gasoline	2006 IPCC default	Emission Factor for USA Vehicles	Light Duty Gasoline Truck	Cold Start		Early Three-Way Catalyst		72	mg/start	Relevant to Equation 3.2.5 in Volume 2 of the 2006 IPCC Guidelines for National Greenhouse Gas Inventories		USEPA (2004). "Update of methane and nitrous oxide emission factors for on-highway vehicles." Report Number EPA420-P-04-016, US Environmental Protection Agency, Washington DC, USA .November 2004	2006 IPCC Guidelines for National Greenhouse Gas Inventories, Volume 2: Energy, Table 3.2.3	IPCC	72	0.072	Component	NG
118688	1A3b2 - Light Duty Trucks	1.A.3.b.ii - Light-duty trucks	METHANE	Motor Gasoline	Motor Gasoline	2006 IPCC default	Emission Factor for USA Vehicles	Light Duty Gasoline Truck	Cold Start		Oxidation Catalyst		99	mg/start	Relevant to Equation 3.2.5 in Volume 2 of the 2006 IPCC Guidelines for National Greenhouse Gas Inventories		USEPA (2004). "Update of methane and nitrous oxide emission factors for on-highway vehicles." Report Number EPA420-P-04-016, US Environmental Protection Agency, Washington DC, USA .November 2004	2006 IPCC Guidelines for National Greenhouse Gas Inventories, Volume 2: Energy, Table 3.2.3	IPCC	99	0.099	Component	NG
118689	1A3b2 - Light Duty Trucks	1.A.3.b.ii - Light-duty trucks	METHANE	Motor Gasoline	Motor Gasoline	2006 IPCC default	Emission Factor for USA Vehicles	Light Duty Gasoline Truck	Cold Start		Non-oxidation Catalyst		67	mg/start	Relevant to Equation 3.2.5 in Volume 2 of the 2006 IPCC Guidelines for National Greenhouse Gas Inventories		USEPA (2004). "Update of methane and nitrous oxide emission factors for on-highway vehicles." Report Number EPA420-P-04-016, US Environmental Protection Agency, Washington DC, USA .November 2004	2006 IPCC Guidelines for National Greenhouse Gas Inventories, Volume 2: Energy, Table 3.2.3	IPCC	67	0.067	Component	NG
118690	1A3b2 - Light Duty Trucks	1.A.3.b.ii - Light-duty trucks	METHANE	Motor Gasoline	Motor Gasoline	2006 IPCC default	Emission Factor for USA Vehicles	Light Duty Gasoline Truck	Cold Start		Uncontrolled		71	mg/start	Relevant to Equation 3.2.5 in Volume 2 of the 2006 IPCC Guidelines for National Greenhouse Gas Inventories		USEPA (2004). "Update of methane and nitrous oxide emission factors for on-highway vehicles." Report Number EPA420-P-04-016, US Environmental Protection Agency, Washington DC, USA .November 2004	2006 IPCC Guidelines for National Greenhouse Gas Inventories, Volume 2: Energy, Table 3.2.3	IPCC	71	0.071	Component	NG
118691	1A3b2 - Light Duty Trucks	1.A.3.b.ii - Light-duty trucks	METHANE	Diesel Oil	Diesel Oil	2006 IPCC default	Emission Factor for USA Vehicles	Light Duty Diesel Truck	Running - (hot)		Advanced and moderate		1	mg/km	Equation 3.2.5 in Volume 2 of the 2006 IPCC Guidelines for National Greenhouse Gas Inventories		USEPA (2004). "Update of methane and nitrous oxide emission factors for on-highway vehicles." Report Number EPA420-P-04-016, US Environmental Protection Agency, Washington DC, USA .November 2004	2006 IPCC Guidelines for National Greenhouse Gas Inventories, Volume 2: Energy, Table 3.2.3	IPCC	1	0.0010617	Component	NG
118692	1A3b2 - Light Duty Trucks	1.A.3.b.ii - Light-duty trucks	METHANE	Diesel Oil	Diesel Oil	2006 IPCC default	Emission Factor for USA Vehicles	Light Duty Diesel Truck	Running - (hot)		Uncontrolled		1	mg/km	Equation 3.2.5 in Volume 2 of the 2006 IPCC Guidelines for National Greenhouse Gas Inventories		USEPA (2004). "Update of methane and nitrous oxide emission factors for on-highway vehicles." Report Number EPA420-P-04-016, US Environmental Protection Agency, Washington DC, USA .November 2004	2006 IPCC Guidelines for National Greenhouse Gas Inventories, Volume 2: Energy, Table 3.2.3	IPCC	1	0.0010617	Component	NG
118693	1A3b2 - Light Duty Trucks	1.A.3.b.ii - Light-duty trucks	METHANE	Diesel Oil	Diesel Oil	2006 IPCC default	Emission Factor for USA Vehicles	Light Duty Diesel Truck	Cold Start		Advanced and moderate		-4	mg/start	Relevant to Equation 3.2.5 in Volume 2 of the 2006 IPCC Guidelines for National Greenhouse Gas Inventories		USEPA (2004). "Update of methane and nitrous oxide emission factors for on-highway vehicles." Report Number EPA420-P-04-016, US Environmental Protection Agency, Washington DC, USA .November 2004	2006 IPCC Guidelines for National Greenhouse Gas Inventories, Volume 2: Energy, Table 3.2.3	IPCC	-4	-0.004	Component	NG
118694	1A3b2 - Light Duty Trucks	1.A.3.b.ii - Light-duty trucks	METHANE	Diesel Oil	Diesel Oil	2006 IPCC default	Emission Factor for USA Vehicles	Light Duty Diesel Truck	Cold Start		Uncontrolled		-4	mg/start	Relevant to Equation 3.2.5 in Volume 2 of the 2006 IPCC Guidelines for National Greenhouse Gas Inventories		USEPA (2004). "Update of methane and nitrous oxide emission factors for on-highway vehicles." Report Number EPA420-P-04-016, US Environmental Protection Agency, Washington DC, USA .November 2004	2006 IPCC Guidelines for National Greenhouse Gas Inventories, Volume 2: Energy, Table 3.2.3	IPCC	-4	-0.004	Component	NG
118695	1A3b3 - Heavy Duty Trucks and Buses	1.A.3.b.iii - Heavy-duty trucks and buses	METHANE	Motor Gasoline	Motor Gasoline	2006 IPCC default	Emission Factor for USA Vehicles	Heavy Duty Gasoline Vehicle	Running - (hot)		Low Emission Vehicle (LEV)		14	mg/km	Equation 3.2.5 in Volume 2 of the 2006 IPCC Guidelines for National Greenhouse Gas Inventories		USEPA (2004). "Update of methane and nitrous oxide emission factors for on-highway vehicles." Report Number EPA420-P-04-016, US Environmental Protection Agency, Washington DC, USA .November 2004	2006 IPCC Guidelines for National Greenhouse Gas Inventories, Volume 2: Energy, Table 3.2.3	IPCC	14	0.0148638	Component	NG
118696	1A3b3 - Heavy Duty Trucks and Buses	1.A.3.b.iii - Heavy-duty trucks and buses	METHANE	Motor Gasoline	Motor Gasoline	2006 IPCC default	Emission Factor for USA Vehicles	Heavy Duty Gasoline Vehicle	Running - (hot)		Advanced Three-Way Catalyst		15	mg/km	Equation 3.2.5 in Volume 2 of the 2006 IPCC Guidelines for National Greenhouse Gas Inventories		USEPA (2004). "Update of methane and nitrous oxide emission factors for on-highway vehicles." Report Number EPA420-P-04-016, US Environmental Protection Agency, Washington DC, USA .November 2004	2006 IPCC Guidelines for National Greenhouse Gas Inventories, Volume 2: Energy, Table 3.2.3	IPCC	15	0.0159255	Component	NG
118697	1A3b3 - Heavy Duty Trucks and Buses	1.A.3.b.iii - Heavy-duty trucks and buses	METHANE	Motor Gasoline	Motor Gasoline	2006 IPCC default	Emission Factor for USA Vehicles	Heavy Duty Gasoline Vehicle	Running - (hot)		Early Three-Way Catalyst		121	mg/km	Equation 3.2.5 in Volume 2 of the 2006 IPCC Guidelines for National Greenhouse Gas Inventories		USEPA (2004). "Update of methane and nitrous oxide emission factors for on-highway vehicles." Report Number EPA420-P-04-016, US Environmental Protection Agency, Washington DC, USA .November 2004	2006 IPCC Guidelines for National Greenhouse Gas Inventories, Volume 2: Energy, Table 3.2.3	IPCC	121	0.128466	Component	NG
118698	1A3b3 - Heavy Duty Trucks and Buses	1.A.3.b.iii - Heavy-duty trucks and buses	METHANE	Motor Gasoline	Motor Gasoline	2006 IPCC default	Emission Factor for USA Vehicles	Heavy Duty Gasoline Vehicle	Running - (hot)		Oxidation Catalyst		111	mg/km	Equation 3.2.5 in Volume 2 of the 2006 IPCC Guidelines for National Greenhouse Gas Inventories		USEPA (2004). "Update of methane and nitrous oxide emission factors for on-highway vehicles." Report Number EPA420-P-04-016, US Environmental Protection Agency, Washington DC, USA .November 2004	2006 IPCC Guidelines for National Greenhouse Gas Inventories, Volume 2: Energy, Table 3.2.3	IPCC	111	0.117849	Component	NG
118699	1A3b3 - Heavy Duty Trucks and Buses	1.A.3.b.iii - Heavy-duty trucks and buses	METHANE	Motor Gasoline	Motor Gasoline	2006 IPCC default	Emission Factor for USA Vehicles	Heavy Duty Gasoline Vehicle	Running - (hot)		Non-oxidation Catalyst		239	mg/km	Equation 3.2.5 in Volume 2 of the 2006 IPCC Guidelines for National Greenhouse Gas Inventories		USEPA (2004). "Update of methane and nitrous oxide emission factors for on-highway vehicles." Report Number EPA420-P-04-016, US Environmental Protection Agency, Washington DC, USA .November 2004	2006 IPCC Guidelines for National Greenhouse Gas Inventories, Volume 2: Energy, Table 3.2.3	IPCC	239	0.253747	Component	NG
118700	1A3b3 - Heavy Duty Trucks and Buses	1.A.3.b.iii - Heavy-duty trucks and buses	METHANE	Motor Gasoline	Motor Gasoline	2006 IPCC default	Emission Factor for USA Vehicles	Heavy Duty Gasoline Vehicle	Running - (hot)		Uncontrolled		263	mg/km	Equation 3.2.5 in Volume 2 of the 2006 IPCC Guidelines for National Greenhouse Gas Inventories		USEPA (2004). "Update of methane and nitrous oxide emission factors for on-highway vehicles." Report Number EPA420-P-04-016, US Environmental Protection Agency, Washington DC, USA .November 2004	2006 IPCC Guidelines for National Greenhouse Gas Inventories, Volume 2: Energy, Table 3.2.3	IPCC	263	0.279228	Component	NG
118701	1A3b3 - Heavy Duty Trucks and Buses	1.A.3.b.iii - Heavy-duty trucks and buses	METHANE	Motor Gasoline	Motor Gasoline	2006 IPCC default	Emission Factor for USA Vehicles	Heavy Duty Gasoline Vehicle	Cold Start		Low Emission Vehicle (LEV)		94	mg/start	Relevant to Equation 3.2.5 in Volume 2 of the 2006 IPCC Guidelines for National Greenhouse Gas Inventories		USEPA (2004). "Update of methane and nitrous oxide emission factors for on-highway vehicles." Report Number EPA420-P-04-016, US Environmental Protection Agency, Washington DC, USA .November 2004	2006 IPCC Guidelines for National Greenhouse Gas Inventories, Volume 2: Energy, Table 3.2.3	IPCC	94	0.094	Component	NG
118702	1A3b3 - Heavy Duty Trucks and Buses	1.A.3.b.iii - Heavy-duty trucks and buses	METHANE	Motor Gasoline	Motor Gasoline	2006 IPCC default	Emission Factor for USA Vehicles	Heavy Duty Gasoline Vehicle	Cold Start		Advanced Three-Way Catalyst		163	mg/start	Relevant to Equation 3.2.5 in Volume 2 of the 2006 IPCC Guidelines for National Greenhouse Gas Inventories		USEPA (2004). "Update of methane and nitrous oxide emission factors for on-highway vehicles." Report Number EPA420-P-04-016, US Environmental Protection Agency, Washington DC, USA .November 2004	2006 IPCC Guidelines for National Greenhouse Gas Inventories, Volume 2: Energy, Table 3.2.3	IPCC	163	0.163	Component	NG
118703	1A3b3 - Heavy Duty Trucks and Buses	1.A.3.b.iii - Heavy-duty trucks and buses	METHANE	Motor Gasoline	Motor Gasoline	2006 IPCC default	Emission Factor for USA Vehicles	Heavy Duty Gasoline Vehicle	Cold Start		Early Three-Way Catalyst		183	mg/start	Relevant to Equation 3.2.5 in Volume 2 of the 2006 IPCC Guidelines for National Greenhouse Gas Inventories		USEPA (2004). "Update of methane and nitrous oxide emission factors for on-highway vehicles." Report Number EPA420-P-04-016, US Environmental Protection Agency, Washington DC, USA .November 2004	2006 IPCC Guidelines for National Greenhouse Gas Inventories, Volume 2: Energy, Table 3.2.3	IPCC	183	0.183	Component	NG
118704	1A3b3 - Heavy Duty Trucks and Buses	1.A.3.b.iii - Heavy-duty trucks and buses	METHANE	Motor Gasoline	Motor Gasoline	2006 IPCC default	Emission Factor for USA Vehicles	Heavy Duty Gasoline Vehicle	Cold Start		Oxidation Catalyst		215	mg/start	Relevant to Equation 3.2.5 in Volume 2 of the 2006 IPCC Guidelines for National Greenhouse Gas Inventories		USEPA (2004). "Update of methane and nitrous oxide emission factors for on-highway vehicles." Report Number EPA420-P-04-016, US Environmental Protection Agency, Washington DC, USA .November 2004	2006 IPCC Guidelines for National Greenhouse Gas Inventories, Volume 2: Energy, Table 3.2.3	IPCC	215	0.215	Component	NG
118705	1A3b3 - Heavy Duty Trucks and Buses	1.A.3.b.iii - Heavy-duty trucks and buses	METHANE	Motor Gasoline	Motor Gasoline	2006 IPCC default	Emission Factor for USA Vehicles	Heavy Duty Gasoline Vehicle	Cold Start		Non-oxidation Catalyst		147	mg/start	Relevant to Equation 3.2.5 in Volume 2 of the 2006 IPCC Guidelines for National Greenhouse Gas Inventories		USEPA (2004). "Update of methane and nitrous oxide emission factors for on-highway vehicles." Report Number EPA420-P-04-016, US Environmental Protection Agency, Washington DC, USA .November 2004	2006 IPCC Guidelines for National Greenhouse Gas Inventories, Volume 2: Energy, Table 3.2.3	IPCC	147	0.147	Component	NG
118706	1A3b3 - Heavy Duty Trucks and Buses	1.A.3.b.iii - Heavy-duty trucks and buses	METHANE	Motor Gasoline	Motor Gasoline	2006 IPCC default	Emission Factor for USA Vehicles	Heavy Duty Gasoline Vehicle	Cold Start		Uncontrolled		162	mg/start	Relevant to Equation 3.2.5 in Volume 2 of the 2006 IPCC Guidelines for National Greenhouse Gas Inventories		USEPA (2004). "Update of methane and nitrous oxide emission factors for on-highway vehicles." Report Number EPA420-P-04-016, US Environmental Protection Agency, Washington DC, USA .November 2004	2006 IPCC Guidelines for National Greenhouse Gas Inventories, Volume 2: Energy, Table 3.2.3	IPCC	162	0.162	Component	NG
118707	1A3b3 - Heavy Duty Trucks and Buses	1.A.3.b.iii - Heavy-duty trucks and buses	METHANE	Diesel Oil	Diesel Oil	2006 IPCC default	Emission Factor for USA Vehicles	Heavy Duty Diesel Vehicle	Running - (hot)		All - advanced, moderate or uncontrolled		4	mg/km	Equation 3.2.5 in Volume 2 of the 2006 IPCC Guidelines for National Greenhouse Gas Inventories		USEPA (2004). "Update of methane and nitrous oxide emission factors for on-highway vehicles." Report Number EPA420-P-04-016, US Environmental Protection Agency, Washington DC, USA .November 2004	2006 IPCC Guidelines for National Greenhouse Gas Inventories, Volume 2: Energy, Table 3.2.3	IPCC	4	0.00424681	Component	NG
118708	1A3b3 - Heavy Duty Trucks and Buses	1.A.3.b.iii - Heavy-duty trucks and buses	METHANE	Diesel Oil	Diesel Oil	2006 IPCC default	Emission Factor for USA Vehicles	Heavy Duty Diesel Vehicle	Cold Start		All - advanced, moderate or uncontrolled		-11	mg/start	Relevant to Equation 3.2.5 in Volume 2 of the 2006 IPCC Guidelines for National Greenhouse Gas Inventories		USEPA (2004). "Update of methane and nitrous oxide emission factors for on-highway vehicles." Report Number EPA420-P-04-016, US Environmental Protection Agency, Washington DC, USA .November 2004	2006 IPCC Guidelines for National Greenhouse Gas Inventories, Volume 2: Energy, Table 3.2.3	IPCC	-11	-0.011	Component	NG
118709	1A3b4 - Motorcycles	1.A.3.b.iv - Motorcycles	METHANE	Motor Gasoline	Motor Gasoline	2006 IPCC default	Emission Factor for USA Vehicles	Motorcycles	Running - (hot)		Non-oxidation Catalyst		40	mg/km	Equation 3.2.5 in Volume 2 of the 2006 IPCC Guidelines for National Greenhouse Gas Inventories		USEPA (2004). "Update of methane and nitrous oxide emission factors for on-highway vehicles." Report Number EPA420-P-04-016, US Environmental Protection Agency, Washington DC, USA .November 2004	2006 IPCC Guidelines for National Greenhouse Gas Inventories, Volume 2: Energy, Table 3.2.3	IPCC	40	0.0424681	Component	NG
118710	1A3b4 - Motorcycles	1.A.3.b.iv - Motorcycles	METHANE	Motor Gasoline	Motor Gasoline	2006 IPCC default	Emission Factor for USA Vehicles	Motorcycles	Running - (hot)		Uncontrolled		53	mg/km	Equation 3.2.5 in Volume 2 of the 2006 IPCC Guidelines for National Greenhouse Gas Inventories		USEPA (2004). "Update of methane and nitrous oxide emission factors for on-highway vehicles." Report Number EPA420-P-04-016, US Environmental Protection Agency, Washington DC, USA .November 2004	2006 IPCC Guidelines for National Greenhouse Gas Inventories, Volume 2: Energy, Table 3.2.3	IPCC	53	0.0562703	Component	NG
118711	1A3b4 - Motorcycles	1.A.3.b.iv - Motorcycles	METHANE	Motor Gasoline	Motor Gasoline	2006 IPCC default	Emission Factor for USA Vehicles	Motorcycles	Cold Start		Non-oxidation Catalyst		24	mg/start	Relevant to Equation 3.2.5 in Volume 2 of the 2006 IPCC Guidelines for National Greenhouse Gas Inventories		USEPA (2004). "Update of methane and nitrous oxide emission factors for on-highway vehicles." Report Number EPA420-P-04-016, US Environmental Protection Agency, Washington DC, USA .November 2004	2006 IPCC Guidelines for National Greenhouse Gas Inventories, Volume 2: Energy, Table 3.2.3	IPCC	24	0.024	Component	NG
118712	1A3b4 - Motorcycles	1.A.3.b.iv - Motorcycles	METHANE	Motor Gasoline	Motor Gasoline	2006 IPCC default	Emission Factor for USA Vehicles	Motorcycles	Cold Start		Uncontrolled		33	mg/start	Relevant to Equation 3.2.5 in Volume 2 of the 2006 IPCC Guidelines for National Greenhouse Gas Inventories		USEPA (2004). "Update of methane and nitrous oxide emission factors for on-highway vehicles." Report Number EPA420-P-04-016, US Environmental Protection Agency, Washington DC, USA .November 2004	2006 IPCC Guidelines for National Greenhouse Gas Inventories, Volume 2: Energy, Table 3.2.3	IPCC	33	0.033	Component	NG
118713	1A3b - Road Transportation	1.A.3.b - Road Transportation	METHANE	Bio-Alcohol	Biogasoline	2006 IPCC default	Emission Factor for Alternative Fuel Vehicles	Light Duty Vehicles	Fuel: Methanol				9	mg/km	Equation 3.2.5 in Volume 2 of the 2006 IPCC Guidelines for National Greenhouse Gas Inventories			2006 IPCC Guidelines for National Greenhouse Gas Inventories, Volume 2: Energy, Table 3.2.4	IPCC	9	0.00955533	Component	NG
118714	1A3b - Road Transportation	1.A.3.b - Road Transportation	METHANE	Natural Gas	Natural Gas	2006 IPCC default	Emission Factor for Alternative Fuel Vehicles	Light Duty Vehicles	Fuel: Compressed Natural Gas (CNG)				215 - 725	mg/km	Equation 3.2.5 in Volume 2 of the 2006 IPCC Guidelines for National Greenhouse Gas Inventories			2006 IPCC Guidelines for National Greenhouse Gas Inventories, Volume 2: Energy, Table 3.2.4	IPCC	470	0.499001	Component	NG
118715	1A3b - Road Transportation	1.A.3.b - Road Transportation	METHANE	Liquefied Petroleum Gas (LPG)	Liquefied Petroleum Gases	2006 IPCC default	Emission Factor for Alternative Fuel Vehicles	Light Duty Vehicles					24	mg/km	Equation 3.2.5 in Volume 2 of the 2006 IPCC Guidelines for National Greenhouse Gas Inventories			2006 IPCC Guidelines for National Greenhouse Gas Inventories, Volume 2: Energy, Table 3.2.4	IPCC	24	0.0254809	Component	NG
118716	1A3b - Road Transportation	1.A.3.b - Road Transportation	METHANE	Bio-Alcohol	Biogasoline	2006 IPCC default	Emission Factor for Alternative Fuel Vehicles	Light Duty Vehicles	Fuel: Ethanol				27 - 45	mg/km	Equation 3.2.5 in Volume 2 of the 2006 IPCC Guidelines for National Greenhouse Gas Inventories			2006 IPCC Guidelines for National Greenhouse Gas Inventories, Volume 2: Energy, Table 3.2.4	IPCC	36	0.0382213	Component	NG
118717	1A3b - Road Transportation	1.A.3.b - Road Transportation	METHANE	Bio-Alcohol	Biogasoline	2006 IPCC default	Emission Factor for Alternative Fuel Vehicles	Heavy Duty Vehicles	Fuel: Methanol				401	mg/km	Equation 3.2.5 in Volume 2 of the 2006 IPCC Guidelines for National Greenhouse Gas Inventories			2006 IPCC Guidelines for National Greenhouse Gas Inventories, Volume 2: Energy, Table 3.2.4	IPCC	401	0.425743	Component	NG
118718	1A3b - Road Transportation	1.A.3.b - Road Transportation	METHANE	Natural Gas	Natural Gas	2006 IPCC default	Emission Factor for Alternative Fuel Vehicles	Heavy Duty Vehicles	Fuel: Compressed Natural Gas (CNG)				5983	mg/km	Equation 3.2.5 in Volume 2 of the 2006 IPCC Guidelines for National Greenhouse Gas Inventories			2006 IPCC Guidelines for National Greenhouse Gas Inventories, Volume 2: Energy, Table 3.2.4	IPCC	5983	6.35217	Component	NG
118719	1A3b - Road Transportation	1.A.3.b - Road Transportation	METHANE	Natural Gas	Natural Gas	2006 IPCC default	Emission Factor for Alternative Fuel Vehicles	Heavy Duty Vehicles	Fuel: Liquefied Natural Gas (LNG)				4261	mg/km	Equation 3.2.5 in Volume 2 of the 2006 IPCC Guidelines for National Greenhouse Gas Inventories			2006 IPCC Guidelines for National Greenhouse Gas Inventories, Volume 2: Energy, Table 3.2.4	IPCC	4261	4.52392	Component	NG
118720	1A3b - Road Transportation	1.A.3.b - Road Transportation	METHANE	Liquefied Petroleum Gas (LPG)	Liquefied Petroleum Gases	2006 IPCC default	Emission Factor for Alternative Fuel Vehicles	Heavy Duty Vehicles					67	mg/km	Equation 3.2.5 in Volume 2 of the 2006 IPCC Guidelines for National Greenhouse Gas Inventories			2006 IPCC Guidelines for National Greenhouse Gas Inventories, Volume 2: Energy, Table 3.2.4	IPCC	67	0.0711341	Component	NG
118721	1A3b - Road Transportation	1.A.3.b - Road Transportation	METHANE	Bio-Alcohol	Biogasoline	2006 IPCC default	Emission Factor for Alternative Fuel Vehicles	Heavy Duty Vehicles	Fuel: Ethanol				1227	mg/km	Equation 3.2.5 in Volume 2 of the 2006 IPCC Guidelines for National Greenhouse Gas Inventories			2006 IPCC Guidelines for National Greenhouse Gas Inventories, Volume 2: Energy, Table 3.2.4	IPCC	1227	1.30271	Component	NG
118722	1A3b3 - Heavy Duty Trucks and Buses	1.A.3.b.iii - Heavy-duty trucks and buses	METHANE	Bio-Alcohol	Biogasoline	2006 IPCC default	Emission Factor for Alternative Fuel Vehicles	Buses	Fuel: Methanol				401	mg/km	Equation 3.2.5 in Volume 2 of the 2006 IPCC Guidelines for National Greenhouse Gas Inventories			2006 IPCC Guidelines for National Greenhouse Gas Inventories, Volume 2: Energy, Table 3.2.4	IPCC	401	0.425743	Component	NG
118723	1A3b3 - Heavy Duty Trucks and Buses	1.A.3.b.iii - Heavy-duty trucks and buses	METHANE	Natural Gas	Natural Gas	2006 IPCC default	Emission Factor for Alternative Fuel Vehicles	Buses	Fuel: Compressed Natural Gas (CNG)				7715	mg/km	Equation 3.2.5 in Volume 2 of the 2006 IPCC Guidelines for National Greenhouse Gas Inventories			2006 IPCC Guidelines for National Greenhouse Gas Inventories, Volume 2: Energy, Table 3.2.4	IPCC	7715	8.19104	Component	NG
118724	1A3b3 - Heavy Duty Trucks and Buses	1.A.3.b.iii - Heavy-duty trucks and buses	METHANE	Bio-Alcohol	Biogasoline	2006 IPCC default	Emission Factor for Alternative Fuel Vehicles	Buses	Fuel: Ethanol				1292	mg/km	Equation 3.2.5 in Volume 2 of the 2006 IPCC Guidelines for National Greenhouse Gas Inventories			2006 IPCC Guidelines for National Greenhouse Gas Inventories, Volume 2: Energy, Table 3.2.4	IPCC	1292	1.37172	Component	NG
118741	1A3b1 - Cars	1.A.3.b.i - Cars	METHANE	Motor Gasoline	Motor Gasoline	2006 IPCC default	Emission Factor for European Vehicles [COPERT IV Model]	Vehicle Technology/Class: Pre-Euro (For details, consult COPERT iV Model)	Driving Condition: Urban, Cold				201	mg/km	Equation 3.2.5 in Volume 2 of the 2006 IPCC Guidelines for National Greenhouse Gas Inventories		Ntziachristos, L and Samaras, Z (2005). Personal Communication Leonidas Ntziachristos and Zissis Samaras based on draft COPERT IV. Laboratory of Applied Thermodynamics, Aristotle University Thessaloniki, PO Box 458, GR 54124, Thessaloniki, GREECE	2006 IPCC Guidelines for National Greenhouse Gas Inventories, Volume 2: Energy, Table 3.2.5	IPCC	201	0.213402	Component	NG
118742	1A3b1 - Cars	1.A.3.b.i - Cars	METHANE	Motor Gasoline	Motor Gasoline	2006 IPCC default	Emission Factor for European Vehicles [COPERT IV Model]	Vehicle Technology/Class: Pre-Euro (For details, consult COPERT iV Model)	Driving Condition: Urban, Hot				131	mg/km	Equation 3.2.5 in Volume 2 of the 2006 IPCC Guidelines for National Greenhouse Gas Inventories		Ntziachristos, L and Samaras, Z (2005). Personal Communication Leonidas Ntziachristos and Zissis Samaras based on draft COPERT IV. Laboratory of Applied Thermodynamics, Aristotle University Thessaloniki, PO Box 458, GR 54124, Thessaloniki, GREECE	2006 IPCC Guidelines for National Greenhouse Gas Inventories, Volume 2: Energy, Table 3.2.5	IPCC	131	0.139083	Component	NG
118743	1A3b1 - Cars	1.A.3.b.i - Cars	METHANE	Motor Gasoline	Motor Gasoline	2006 IPCC default	Emission Factor for European Vehicles [COPERT IV Model]	Vehicle Technology/Class: Pre-Euro (For details, consult COPERT iV Model)	Driving Condition: Rural				86	mg/km	Equation 3.2.5 in Volume 2 of the 2006 IPCC Guidelines for National Greenhouse Gas Inventories		Ntziachristos, L and Samaras, Z (2005). Personal Communication Leonidas Ntziachristos and Zissis Samaras based on draft COPERT IV. Laboratory of Applied Thermodynamics, Aristotle University Thessaloniki, PO Box 458, GR 54124, Thessaloniki, GREECE	2006 IPCC Guidelines for National Greenhouse Gas Inventories, Volume 2: Energy, Table 3.2.5	IPCC	86	0.0913065	Component	NG
118744	1A3b1 - Cars	1.A.3.b.i - Cars	METHANE	Motor Gasoline	Motor Gasoline	2006 IPCC default	Emission Factor for European Vehicles [COPERT IV Model]	Vehicle Technology/Class: Pre-Euro (For details, consult COPERT iV Model)	Driving Condition: Highway				41	mg/km	Equation 3.2.5 in Volume 2 of the 2006 IPCC Guidelines for National Greenhouse Gas Inventories		Ntziachristos, L and Samaras, Z (2005). Personal Communication Leonidas Ntziachristos and Zissis Samaras based on draft COPERT IV. Laboratory of Applied Thermodynamics, Aristotle University Thessaloniki, PO Box 458, GR 54124, Thessaloniki, GREECE	2006 IPCC Guidelines for National Greenhouse Gas Inventories, Volume 2: Energy, Table 3.2.5	IPCC	41	0.0435298	Component	NG
118749	1A3b1 - Cars	1.A.3.b.i - Cars	METHANE	Motor Gasoline	Motor Gasoline	2006 IPCC default	Emission Factor for European Vehicles [COPERT IV Model]	Vehicle Technology/Class: Euro 1 (For details, consult COPERT iV Model)	Driving Condition: Urban, Cold				45	mg/km	Equation 3.2.5 in Volume 2 of the 2006 IPCC Guidelines for National Greenhouse Gas Inventories		Ntziachristos, L and Samaras, Z (2005). Personal Communication Leonidas Ntziachristos and Zissis Samaras based on draft COPERT IV. Laboratory of Applied Thermodynamics, Aristotle University Thessaloniki, PO Box 458, GR 54124, Thessaloniki, GREECE	2006 IPCC Guidelines for National Greenhouse Gas Inventories, Volume 2: Energy, Table 3.2.5	IPCC	45	0.0477766	Component	NG
118750	1A3b1 - Cars	1.A.3.b.i - Cars	METHANE	Motor Gasoline	Motor Gasoline	2006 IPCC default	Emission Factor for European Vehicles [COPERT IV Model]	Vehicle Technology/Class: Euro 1 (For details, consult COPERT iV Model)	Driving Condition: Urban, Hot				26	mg/km	Equation 3.2.5 in Volume 2 of the 2006 IPCC Guidelines for National Greenhouse Gas Inventories		Ntziachristos, L and Samaras, Z (2005). Personal Communication Leonidas Ntziachristos and Zissis Samaras based on draft COPERT IV. Laboratory of Applied Thermodynamics, Aristotle University Thessaloniki, PO Box 458, GR 54124, Thessaloniki, GREECE	2006 IPCC Guidelines for National Greenhouse Gas Inventories, Volume 2: Energy, Table 3.2.5	IPCC	26	0.0276043	Component	NG
118751	1A3b1 - Cars	1.A.3.b.i - Cars	METHANE	Motor Gasoline	Motor Gasoline	2006 IPCC default	Emission Factor for European Vehicles [COPERT IV Model]	Vehicle Technology/Class: Euro 1 (For details, consult COPERT iV Model)	Driving Condition: Rural				16	mg/km	Equation 3.2.5 in Volume 2 of the 2006 IPCC Guidelines for National Greenhouse Gas Inventories		Ntziachristos, L and Samaras, Z (2005). Personal Communication Leonidas Ntziachristos and Zissis Samaras based on draft COPERT IV. Laboratory of Applied Thermodynamics, Aristotle University Thessaloniki, PO Box 458, GR 54124, Thessaloniki, GREECE	2006 IPCC Guidelines for National Greenhouse Gas Inventories, Volume 2: Energy, Table 3.2.5	IPCC	16	0.0169873	Component	NG
118752	1A3b1 - Cars	1.A.3.b.i - Cars	METHANE	Motor Gasoline	Motor Gasoline	2006 IPCC default	Emission Factor for European Vehicles [COPERT IV Model]	Vehicle Technology/Class: Euro 1 (For details, consult COPERT iV Model)	Driving Condition: Highway				14	mg/km	Equation 3.2.5 in Volume 2 of the 2006 IPCC Guidelines for National Greenhouse Gas Inventories		Ntziachristos, L and Samaras, Z (2005). Personal Communication Leonidas Ntziachristos and Zissis Samaras based on draft COPERT IV. Laboratory of Applied Thermodynamics, Aristotle University Thessaloniki, PO Box 458, GR 54124, Thessaloniki, GREECE	2006 IPCC Guidelines for National Greenhouse Gas Inventories, Volume 2: Energy, Table 3.2.5	IPCC	14	0.0148638	Component	NG
118757	1A3b1 - Cars	1.A.3.b.i - Cars	METHANE	Motor Gasoline	Motor Gasoline	2006 IPCC default	Emission Factor for European Vehicles [COPERT IV Model]	Vehicle Technology/Class: Euro 2 (For details, consult COPERT iV Model)	Driving Condition: Urban, Cold				94	mg/km	Equation 3.2.5 in Volume 2 of the 2006 IPCC Guidelines for National Greenhouse Gas Inventories		Ntziachristos, L and Samaras, Z (2005). Personal Communication Leonidas Ntziachristos and Zissis Samaras based on draft COPERT IV. Laboratory of Applied Thermodynamics, Aristotle University Thessaloniki, PO Box 458, GR 54124, Thessaloniki, GREECE	2006 IPCC Guidelines for National Greenhouse Gas Inventories, Volume 2: Energy, Table 3.2.5	IPCC	94	0.0998001	Component	NG
118758	1A3b1 - Cars	1.A.3.b.i - Cars	METHANE	Motor Gasoline	Motor Gasoline	2006 IPCC default	Emission Factor for European Vehicles [COPERT IV Model]	Vehicle Technology/Class: Euro 2 (For details, consult COPERT iV Model)	Driving Condition: Urban, Hot				17	mg/km	Equation 3.2.5 in Volume 2 of the 2006 IPCC Guidelines for National Greenhouse Gas Inventories		Ntziachristos, L and Samaras, Z (2005). Personal Communication Leonidas Ntziachristos and Zissis Samaras based on draft COPERT IV. Laboratory of Applied Thermodynamics, Aristotle University Thessaloniki, PO Box 458, GR 54124, Thessaloniki, GREECE	2006 IPCC Guidelines for National Greenhouse Gas Inventories, Volume 2: Energy, Table 3.2.5	IPCC	17	0.018049	Component	NG
118759	1A3b1 - Cars	1.A.3.b.i - Cars	METHANE	Motor Gasoline	Motor Gasoline	2006 IPCC default	Emission Factor for European Vehicles [COPERT IV Model]	Vehicle Technology/Class: Euro 2 (For details, consult COPERT iV Model)	Driving Condition: Rural				13	mg/km	Equation 3.2.5 in Volume 2 of the 2006 IPCC Guidelines for National Greenhouse Gas Inventories		Ntziachristos, L and Samaras, Z (2005). Personal Communication Leonidas Ntziachristos and Zissis Samaras based on draft COPERT IV. Laboratory of Applied Thermodynamics, Aristotle University Thessaloniki, PO Box 458, GR 54124, Thessaloniki, GREECE	2006 IPCC Guidelines for National Greenhouse Gas Inventories, Volume 2: Energy, Table 3.2.5	IPCC	13	0.0138021	Component	NG
118760	1A3b1 - Cars	1.A.3.b.i - Cars	METHANE	Motor Gasoline	Motor Gasoline	2006 IPCC default	Emission Factor for European Vehicles [COPERT IV Model]	Vehicle Technology/Class: Euro 2 (For details, consult COPERT iV Model)	Driving Condition: Highway				11	mg/km	Equation 3.2.5 in Volume 2 of the 2006 IPCC Guidelines for National Greenhouse Gas Inventories		Ntziachristos, L and Samaras, Z (2005). Personal Communication Leonidas Ntziachristos and Zissis Samaras based on draft COPERT IV. Laboratory of Applied Thermodynamics, Aristotle University Thessaloniki, PO Box 458, GR 54124, Thessaloniki, GREECE	2006 IPCC Guidelines for National Greenhouse Gas Inventories, Volume 2: Energy, Table 3.2.5	IPCC	11	0.0116787	Component	NG
118765	1A3b1 - Cars	1.A.3.b.i - Cars	METHANE	Motor Gasoline	Motor Gasoline	2006 IPCC default	Emission Factor for European Vehicles [COPERT IV Model]	Vehicle Technology/Class: Euro 3 (For details, consult COPERT iV Model)	Driving Condition: Urban, Cold				83	mg/km	Equation 3.2.5 in Volume 2 of the 2006 IPCC Guidelines for National Greenhouse Gas Inventories		Ntziachristos, L and Samaras, Z (2005). Personal Communication Leonidas Ntziachristos and Zissis Samaras based on draft COPERT IV. Laboratory of Applied Thermodynamics, Aristotle University Thessaloniki, PO Box 458, GR 54124, Thessaloniki, GREECE	2006 IPCC Guidelines for National Greenhouse Gas Inventories, Volume 2: Energy, Table 3.2.5	IPCC	83	0.0881214	Component	NG
118766	1A3b1 - Cars	1.A.3.b.i - Cars	METHANE	Motor Gasoline	Motor Gasoline	2006 IPCC default	Emission Factor for European Vehicles [COPERT IV Model]	Vehicle Technology/Class: Euro 3 (For details, consult COPERT iV Model)	Driving Condition: Urban, Hot				3	mg/km	Equation 3.2.5 in Volume 2 of the 2006 IPCC Guidelines for National Greenhouse Gas Inventories		Ntziachristos, L and Samaras, Z (2005). Personal Communication Leonidas Ntziachristos and Zissis Samaras based on draft COPERT IV. Laboratory of Applied Thermodynamics, Aristotle University Thessaloniki, PO Box 458, GR 54124, Thessaloniki, GREECE	2006 IPCC Guidelines for National Greenhouse Gas Inventories, Volume 2: Energy, Table 3.2.5	IPCC	3	0.00318511	Component	NG
118767	1A3b1 - Cars	1.A.3.b.i - Cars	METHANE	Motor Gasoline	Motor Gasoline	2006 IPCC default	Emission Factor for European Vehicles [COPERT IV Model]	Vehicle Technology/Class: Euro 3 (For details, consult COPERT iV Model)	Driving Condition: Rural				2	mg/km	Equation 3.2.5 in Volume 2 of the 2006 IPCC Guidelines for National Greenhouse Gas Inventories		Ntziachristos, L and Samaras, Z (2005). Personal Communication Leonidas Ntziachristos and Zissis Samaras based on draft COPERT IV. Laboratory of Applied Thermodynamics, Aristotle University Thessaloniki, PO Box 458, GR 54124, Thessaloniki, GREECE	2006 IPCC Guidelines for National Greenhouse Gas Inventories, Volume 2: Energy, Table 3.2.5	IPCC	2	0.00212341	Component	NG
118768	1A3b1 - Cars	1.A.3.b.i - Cars	METHANE	Motor Gasoline	Motor Gasoline	2006 IPCC default	Emission Factor for European Vehicles [COPERT IV Model]	Vehicle Technology/Class: Euro 3 (For details, consult COPERT iV Model)	Driving Condition: Highway				4	mg/km	Equation 3.2.5 in Volume 2 of the 2006 IPCC Guidelines for National Greenhouse Gas Inventories		Ntziachristos, L and Samaras, Z (2005). Personal Communication Leonidas Ntziachristos and Zissis Samaras based on draft COPERT IV. Laboratory of Applied Thermodynamics, Aristotle University Thessaloniki, PO Box 458, GR 54124, Thessaloniki, GREECE	2006 IPCC Guidelines for National Greenhouse Gas Inventories, Volume 2: Energy, Table 3.2.5	IPCC	4	0.00424681	Component	NG
118773	1A3b1 - Cars	1.A.3.b.i - Cars	METHANE	Motor Gasoline	Motor Gasoline	2006 IPCC default	Emission Factor for European Vehicles [COPERT IV Model]	Vehicle Technology/Class: Euro 4 (For details, consult COPERT iV Model)	Driving Condition: Urban, Cold				57	mg/km	Equation 3.2.5 in Volume 2 of the 2006 IPCC Guidelines for National Greenhouse Gas Inventories		Ntziachristos, L and Samaras, Z (2005). Personal Communication Leonidas Ntziachristos and Zissis Samaras based on draft COPERT IV. Laboratory of Applied Thermodynamics, Aristotle University Thessaloniki, PO Box 458, GR 54124, Thessaloniki, GREECE	2006 IPCC Guidelines for National Greenhouse Gas Inventories, Volume 2: Energy, Table 3.2.5	IPCC	57	0.0605171	Component	NG
118774	1A3b1 - Cars	1.A.3.b.i - Cars	METHANE	Motor Gasoline	Motor Gasoline	2006 IPCC default	Emission Factor for European Vehicles [COPERT IV Model]	Vehicle Technology/Class: Euro 4 (For details, consult COPERT iV Model)	Driving Condition: Urban, Hot				2	mg/km	Equation 3.2.5 in Volume 2 of the 2006 IPCC Guidelines for National Greenhouse Gas Inventories		Ntziachristos, L and Samaras, Z (2005). Personal Communication Leonidas Ntziachristos and Zissis Samaras based on draft COPERT IV. Laboratory of Applied Thermodynamics, Aristotle University Thessaloniki, PO Box 458, GR 54124, Thessaloniki, GREECE	2006 IPCC Guidelines for National Greenhouse Gas Inventories, Volume 2: Energy, Table 3.2.5	IPCC	2	0.00212341	Component	NG
118775	1A3b1 - Cars	1.A.3.b.i - Cars	METHANE	Motor Gasoline	Motor Gasoline	2006 IPCC default	Emission Factor for European Vehicles [COPERT IV Model]	Vehicle Technology/Class: Euro 4 (For details, consult COPERT iV Model)	Driving Condition: Rural				2	mg/km	Equation 3.2.5 in Volume 2 of the 2006 IPCC Guidelines for National Greenhouse Gas Inventories		Ntziachristos, L and Samaras, Z (2005). Personal Communication Leonidas Ntziachristos and Zissis Samaras based on draft COPERT IV. Laboratory of Applied Thermodynamics, Aristotle University Thessaloniki, PO Box 458, GR 54124, Thessaloniki, GREECE	2006 IPCC Guidelines for National Greenhouse Gas Inventories, Volume 2: Energy, Table 3.2.5	IPCC	2	0.00212341	Component	NG
118776	1A3b1 - Cars	1.A.3.b.i - Cars	METHANE	Motor Gasoline	Motor Gasoline	2006 IPCC default	Emission Factor for European Vehicles [COPERT IV Model]	Vehicle Technology/Class: Euro 4 (For details, consult COPERT iV Model)	Driving Condition: Highway				0	mg/km	Equation 3.2.5 in Volume 2 of the 2006 IPCC Guidelines for National Greenhouse Gas Inventories		Ntziachristos, L and Samaras, Z (2005). Personal Communication Leonidas Ntziachristos and Zissis Samaras based on draft COPERT IV. Laboratory of Applied Thermodynamics, Aristotle University Thessaloniki, PO Box 458, GR 54124, Thessaloniki, GREECE	2006 IPCC Guidelines for National Greenhouse Gas Inventories, Volume 2: Energy, Table 3.2.5	IPCC	0	0	Component	NG
118781	1A3b1 - Cars	1.A.3.b.i - Cars	METHANE	Diesel Oil	Diesel Oil	2006 IPCC default	Emission Factor for European Vehicles [COPERT IV Model]	Vehicle Technology/Class: Pre-Euro (For details, consult COPERT iV Model)	Driving Condition: Urban, Cold				22	mg/km	Equation 3.2.5 in Volume 2 of the 2006 IPCC Guidelines for National Greenhouse Gas Inventories		Ntziachristos, L. and Samaras, Z. (2005) Personal communication based on draft COPERT IV. Laboratory of Applied Thermodynamics, Aristotle Unviversity Thessaloniki, P.O. Box 458, GR 54124, Thessaloniki, GREECE	2006 IPCC Guidelines for National Greenhouse Gas Inventories, Volume 2: Energy, Table 3.2.5	IPCC	22	0.0233575	Component	NG
118782	1A3b1 - Cars	1.A.3.b.i - Cars	METHANE	Diesel Oil	Diesel Oil	2006 IPCC default	Emission Factor for European Vehicles [COPERT IV Model]	Vehicle Technology/Class: Pre-Euro (For details, consult COPERT iV Model)	Driving Condition: Urban, Hot				28	mg/km	Equation 3.2.5 in Volume 2 of the 2006 IPCC Guidelines for National Greenhouse Gas Inventories		Ntziachristos, L. and Samaras, Z. (2005) Personal communication based on draft COPERT IV. Laboratory of Applied Thermodynamics, Aristotle Unviversity Thessaloniki, P.O. Box 458, GR 54124, Thessaloniki, GREECE	2006 IPCC Guidelines for National Greenhouse Gas Inventories, Volume 2: Energy, Table 3.2.5	IPCC	28	0.0297277	Component	NG
118783	1A3b1 - Cars	1.A.3.b.i - Cars	METHANE	Diesel Oil	Diesel Oil	2006 IPCC default	Emission Factor for European Vehicles [COPERT IV Model]	Vehicle Technology/Class: Pre-Euro (For details, consult COPERT iV Model)	Driving Condition: Rural				12	mg/km	Equation 3.2.5 in Volume 2 of the 2006 IPCC Guidelines for National Greenhouse Gas Inventories		Ntziachristos, L. and Samaras, Z. (2005) Personal communication based on draft COPERT IV. Laboratory of Applied Thermodynamics, Aristotle Unviversity Thessaloniki, P.O. Box 458, GR 54124, Thessaloniki, GREECE	2006 IPCC Guidelines for National Greenhouse Gas Inventories, Volume 2: Energy, Table 3.2.5	IPCC	12	0.0127404	Component	NG
118784	1A3b1 - Cars	1.A.3.b.i - Cars	METHANE	Diesel Oil	Diesel Oil	2006 IPCC default	Emission Factor for European Vehicles [COPERT IV Model]	Vehicle Technology/Class: Pre-Euro (For details, consult COPERT iV Model)	Driving Condition: Highway				8	mg/km	Equation 3.2.5 in Volume 2 of the 2006 IPCC Guidelines for National Greenhouse Gas Inventories		Ntziachristos, L. and Samaras, Z. (2005) Personal communication based on draft COPERT IV. Laboratory of Applied Thermodynamics, Aristotle Unviversity Thessaloniki, P.O. Box 458, GR 54124, Thessaloniki, GREECE	2006 IPCC Guidelines for National Greenhouse Gas Inventories, Volume 2: Energy, Table 3.2.5	IPCC	8	0.00849363	Component	NG
118789	1A3b1 - Cars	1.A.3.b.i - Cars	METHANE	Diesel Oil	Diesel Oil	2006 IPCC default	Emission Factor for European Vehicles [COPERT IV Model]	Vehicle Technology/Class: Euro 1 (For details, consult COPERT iV Model)	Driving Condition: Urban, Cold				18	mg/km	Equation 3.2.5 in Volume 2 of the 2006 IPCC Guidelines for National Greenhouse Gas Inventories		Ntziachristos, L. and Samaras, Z. (2005) Personal communication based on draft COPERT IV. Laboratory of Applied Thermodynamics, Aristotle Unviversity Thessaloniki, P.O. Box 458, GR 54124, Thessaloniki, GREECE	2006 IPCC Guidelines for National Greenhouse Gas Inventories, Volume 2: Energy, Table 3.2.5	IPCC	18	0.0191107	Component	NG
118790	1A3b1 - Cars	1.A.3.b.i - Cars	METHANE	Diesel Oil	Diesel Oil	2006 IPCC default	Emission Factor for European Vehicles [COPERT IV Model]	Vehicle Technology/Class: Euro 1 (For details, consult COPERT iV Model)	Driving Condition: Urban, Hot				11	mg/km	Equation 3.2.5 in Volume 2 of the 2006 IPCC Guidelines for National Greenhouse Gas Inventories		Ntziachristos, L. and Samaras, Z. (2005) Personal communication based on draft COPERT IV. Laboratory of Applied Thermodynamics, Aristotle Unviversity Thessaloniki, P.O. Box 458, GR 54124, Thessaloniki, GREECE	2006 IPCC Guidelines for National Greenhouse Gas Inventories, Volume 2: Energy, Table 3.2.5	IPCC	11	0.0116787	Component	NG
118791	1A3b1 - Cars	1.A.3.b.i - Cars	METHANE	Diesel Oil	Diesel Oil	2006 IPCC default	Emission Factor for European Vehicles [COPERT IV Model]	Vehicle Technology/Class: Euro 1 (For details, consult COPERT iV Model)	Driving Condition: Rural				9	mg/km	Equation 3.2.5 in Volume 2 of the 2006 IPCC Guidelines for National Greenhouse Gas Inventories		Ntziachristos, L. and Samaras, Z. (2005) Personal communication based on draft COPERT IV. Laboratory of Applied Thermodynamics, Aristotle Unviversity Thessaloniki, P.O. Box 458, GR 54124, Thessaloniki, GREECE	2006 IPCC Guidelines for National Greenhouse Gas Inventories, Volume 2: Energy, Table 3.2.5	IPCC	9	0.00955533	Component	NG
118792	1A3b1 - Cars	1.A.3.b.i - Cars	METHANE	Diesel Oil	Diesel Oil	2006 IPCC default	Emission Factor for European Vehicles [COPERT IV Model]	Vehicle Technology/Class: Euro 1 (For details, consult COPERT iV Model)	Driving Condition: Highway				3	mg/km	Equation 3.2.5 in Volume 2 of the 2006 IPCC Guidelines for National Greenhouse Gas Inventories		Ntziachristos, L. and Samaras, Z. (2005) Personal communication based on draft COPERT IV. Laboratory of Applied Thermodynamics, Aristotle Unviversity Thessaloniki, P.O. Box 458, GR 54124, Thessaloniki, GREECE	2006 IPCC Guidelines for National Greenhouse Gas Inventories, Volume 2: Energy, Table 3.2.5	IPCC	3	0.00318511	Component	NG
118797	1A3b1 - Cars	1.A.3.b.i - Cars	METHANE	Diesel Oil	Diesel Oil	2006 IPCC default	Emission Factor for European Vehicles [COPERT IV Model]	Vehicle Technology/Class: Euro 2 (For details, consult COPERT iV Model)	Driving Condition: Urban, Cold				6	mg/km	Equation 3.2.5 in Volume 2 of the 2006 IPCC Guidelines for National Greenhouse Gas Inventories		Ntziachristos, L. and Samaras, Z. (2005) Personal communication based on draft COPERT IV. Laboratory of Applied Thermodynamics, Aristotle Unviversity Thessaloniki, P.O. Box 458, GR 54124, Thessaloniki, GREECE	2006 IPCC Guidelines for National Greenhouse Gas Inventories, Volume 2: Energy, Table 3.2.5	IPCC	6	0.00637022	Component	NG
118798	1A3b1 - Cars	1.A.3.b.i - Cars	METHANE	Diesel Oil	Diesel Oil	2006 IPCC default	Emission Factor for European Vehicles [COPERT IV Model]	Vehicle Technology/Class: Euro 2 (For details, consult COPERT iV Model)	Driving Condition: Urban, Hot				7	mg/km	Equation 3.2.5 in Volume 2 of the 2006 IPCC Guidelines for National Greenhouse Gas Inventories		Ntziachristos, L. and Samaras, Z. (2005) Personal communication based on draft COPERT IV. Laboratory of Applied Thermodynamics, Aristotle Unviversity Thessaloniki, P.O. Box 458, GR 54124, Thessaloniki, GREECE	2006 IPCC Guidelines for National Greenhouse Gas Inventories, Volume 2: Energy, Table 3.2.5	IPCC	7	0.00743192	Component	NG
118799	1A3b1 - Cars	1.A.3.b.i - Cars	METHANE	Diesel Oil	Diesel Oil	2006 IPCC default	Emission Factor for European Vehicles [COPERT IV Model]	Vehicle Technology/Class: Euro 2 (For details, consult COPERT iV Model)	Driving Condition: Rural				3	mg/km	Equation 3.2.5 in Volume 2 of the 2006 IPCC Guidelines for National Greenhouse Gas Inventories		Ntziachristos, L. and Samaras, Z. (2005) Personal communication based on draft COPERT IV. Laboratory of Applied Thermodynamics, Aristotle Unviversity Thessaloniki, P.O. Box 458, GR 54124, Thessaloniki, GREECE	2006 IPCC Guidelines for National Greenhouse Gas Inventories, Volume 2: Energy, Table 3.2.5	IPCC	3	0.00318511	Component	NG
118800	1A3b1 - Cars	1.A.3.b.i - Cars	METHANE	Diesel Oil	Diesel Oil	2006 IPCC default	Emission Factor for European Vehicles [COPERT IV Model]	Vehicle Technology/Class: Euro 2 (For details, consult COPERT iV Model)	Driving Condition: Highway				2	mg/km	Equation 3.2.5 in Volume 2 of the 2006 IPCC Guidelines for National Greenhouse Gas Inventories		Ntziachristos, L. and Samaras, Z. (2005) Personal communication based on draft COPERT IV. Laboratory of Applied Thermodynamics, Aristotle Unviversity Thessaloniki, P.O. Box 458, GR 54124, Thessaloniki, GREECE	2006 IPCC Guidelines for National Greenhouse Gas Inventories, Volume 2: Energy, Table 3.2.5	IPCC	2	0.00212341	Component	NG
118805	1A3b1 - Cars	1.A.3.b.i - Cars	METHANE	Diesel Oil	Diesel Oil	2006 IPCC default	Emission Factor for European Vehicles [COPERT IV Model]	Vehicle Technology/Class: Euro 3 (For details, consult COPERT iV Model)	Driving Condition: Urban, Cold				7	mg/km	Equation 3.2.5 in Volume 2 of the 2006 IPCC Guidelines for National Greenhouse Gas Inventories		Ntziachristos, L. and Samaras, Z. (2005) Personal communication based on draft COPERT IV. Laboratory of Applied Thermodynamics, Aristotle Unviversity Thessaloniki, P.O. Box 458, GR 54124, Thessaloniki, GREECE	2006 IPCC Guidelines for National Greenhouse Gas Inventories, Volume 2: Energy, Table 3.2.5	IPCC	7	0.00743192	Component	NG
118806	1A3b1 - Cars	1.A.3.b.i - Cars	METHANE	Diesel Oil	Diesel Oil	2006 IPCC default	Emission Factor for European Vehicles [COPERT IV Model]	Vehicle Technology/Class: Euro 3 (For details, consult COPERT iV Model)	Driving Condition: Urban, Hot				3	mg/km	Equation 3.2.5 in Volume 2 of the 2006 IPCC Guidelines for National Greenhouse Gas Inventories		Ntziachristos, L. and Samaras, Z. (2005) Personal communication based on draft COPERT IV. Laboratory of Applied Thermodynamics, Aristotle Unviversity Thessaloniki, P.O. Box 458, GR 54124, Thessaloniki, GREECE	2006 IPCC Guidelines for National Greenhouse Gas Inventories, Volume 2: Energy, Table 3.2.5	IPCC	3	0.00318511	Component	NG
118807	1A3b1 - Cars	1.A.3.b.i - Cars	METHANE	Diesel Oil	Diesel Oil	2006 IPCC default	Emission Factor for European Vehicles [COPERT IV Model]	Vehicle Technology/Class: Euro 3 (For details, consult COPERT iV Model)	Driving Condition: Rural				0	mg/km	Equation 3.2.5 in Volume 2 of the 2006 IPCC Guidelines for National Greenhouse Gas Inventories		Ntziachristos, L. and Samaras, Z. (2005) Personal communication based on draft COPERT IV. Laboratory of Applied Thermodynamics, Aristotle Unviversity Thessaloniki, P.O. Box 458, GR 54124, Thessaloniki, GREECE	2006 IPCC Guidelines for National Greenhouse Gas Inventories, Volume 2: Energy, Table 3.2.5	IPCC	0	0	Component	NG
118808	1A3b1 - Cars	1.A.3.b.i - Cars	METHANE	Diesel Oil	Diesel Oil	2006 IPCC default	Emission Factor for European Vehicles [COPERT IV Model]	Vehicle Technology/Class: Euro 3 (For details, consult COPERT iV Model)	Driving Condition: Highway				0	mg/km	Equation 3.2.5 in Volume 2 of the 2006 IPCC Guidelines for National Greenhouse Gas Inventories		Ntziachristos, L. and Samaras, Z. (2005) Personal communication based on draft COPERT IV. Laboratory of Applied Thermodynamics, Aristotle Unviversity Thessaloniki, P.O. Box 458, GR 54124, Thessaloniki, GREECE	2006 IPCC Guidelines for National Greenhouse Gas Inventories, Volume 2: Energy, Table 3.2.5	IPCC	0	0	Component	NG
118813	1A3b1 - Cars	1.A.3.b.i - Cars	METHANE	Diesel Oil	Diesel Oil	2006 IPCC default	Emission Factor for European Vehicles [COPERT IV Model]	Vehicle Technology/Class: Euro 4 (For details, consult COPERT iV Model)	Driving Condition: Urban, Cold				0	mg/km	Equation 3.2.5 in Volume 2 of the 2006 IPCC Guidelines for National Greenhouse Gas Inventories		Ntziachristos, L. and Samaras, Z. (2005) Personal communication based on draft COPERT IV. Laboratory of Applied Thermodynamics, Aristotle Unviversity Thessaloniki, P.O. Box 458, GR 54124, Thessaloniki, GREECE	2006 IPCC Guidelines for National Greenhouse Gas Inventories, Volume 2: Energy, Table 3.2.5	IPCC	0	0	Component	NG
118814	1A3b1 - Cars	1.A.3.b.i - Cars	METHANE	Diesel Oil	Diesel Oil	2006 IPCC default	Emission Factor for European Vehicles [COPERT IV Model]	Vehicle Technology/Class: Euro 4 (For details, consult COPERT iV Model)	Driving Condition: Urban, Hot				0	mg/km	Equation 3.2.5 in Volume 2 of the 2006 IPCC Guidelines for National Greenhouse Gas Inventories		Ntziachristos, L. and Samaras, Z. (2005) Personal communication based on draft COPERT IV. Laboratory of Applied Thermodynamics, Aristotle Unviversity Thessaloniki, P.O. Box 458, GR 54124, Thessaloniki, GREECE	2006 IPCC Guidelines for National Greenhouse Gas Inventories, Volume 2: Energy, Table 3.2.5	IPCC	0	0	Component	NG
118815	1A3b1 - Cars	1.A.3.b.i - Cars	METHANE	Diesel Oil	Diesel Oil	2006 IPCC default	Emission Factor for European Vehicles [COPERT IV Model]	Vehicle Technology/Class: Euro 4 (For details, consult COPERT iV Model)	Driving Condition: Rural				0	mg/km	Equation 3.2.5 in Volume 2 of the 2006 IPCC Guidelines for National Greenhouse Gas Inventories		Ntziachristos, L. and Samaras, Z. (2005) Personal communication based on draft COPERT IV. Laboratory of Applied Thermodynamics, Aristotle Unviversity Thessaloniki, P.O. Box 458, GR 54124, Thessaloniki, GREECE	2006 IPCC Guidelines for National Greenhouse Gas Inventories, Volume 2: Energy, Table 3.2.5	IPCC	0	0	Component	NG
118816	1A3b1 - Cars	1.A.3.b.i - Cars	METHANE	Diesel Oil	Diesel Oil	2006 IPCC default	Emission Factor for European Vehicles [COPERT IV Model]	Vehicle Technology/Class: Euro 4 (For details, consult COPERT iV Model)	Driving Condition: Highway				0	mg/km	Equation 3.2.5 in Volume 2 of the 2006 IPCC Guidelines for National Greenhouse Gas Inventories		Ntziachristos, L. and Samaras, Z. (2005) Personal communication based on draft COPERT IV. Laboratory of Applied Thermodynamics, Aristotle Unviversity Thessaloniki, P.O. Box 458, GR 54124, Thessaloniki, GREECE	2006 IPCC Guidelines for National Greenhouse Gas Inventories, Volume 2: Energy, Table 3.2.5	IPCC	0	0	Component	NG
118821	1A3b1 - Cars	1.A.3.b.i - Cars	METHANE	Liquefied Petroleum Gas (LPG)	Liquefied Petroleum Gases	2006 IPCC default	Emission Factor for European Vehicles [COPERT IV Model]	Vehicle Technology/Class: pre-ECE (For details, consult COPERT iV Model)	Driving Condition: Urban, Cold				80	mg/km	Equation 3.2.5 in Volume 2 of the 2006 IPCC Guidelines for National Greenhouse Gas Inventories		Ntziachristos, L. and Samaras, Z. (2005) Personal communication based on draft COPERT IV. Laboratory of Applied Thermodynamics, Aristotle Unviversity Thessaloniki, P.O. Box 458, GR 54124, Thessaloniki, GREECE	2006 IPCC Guidelines for National Greenhouse Gas Inventories, Volume 2: Energy, Table 3.2.5	IPCC	80	0.0849363	Component	NG
118822	1A3b1 - Cars	1.A.3.b.i - Cars	METHANE	Liquefied Petroleum Gas (LPG)	Liquefied Petroleum Gases	2006 IPCC default	Emission Factor for European Vehicles [COPERT IV Model]	Vehicle Technology/Class: pre-ECE (For details, consult COPERT iV Model)	Driving Condition: Urban, Hot				80	mg/km	Equation 3.2.5 in Volume 2 of the 2006 IPCC Guidelines for National Greenhouse Gas Inventories		Ntziachristos, L. and Samaras, Z. (2005) Personal communication based on draft COPERT IV. Laboratory of Applied Thermodynamics, Aristotle Unviversity Thessaloniki, P.O. Box 458, GR 54124, Thessaloniki, GREECE	2006 IPCC Guidelines for National Greenhouse Gas Inventories, Volume 2: Energy, Table 3.2.5	IPCC	80	0.0849363	Component	NG
118823	1A3b1 - Cars	1.A.3.b.i - Cars	METHANE	Liquefied Petroleum Gas (LPG)	Liquefied Petroleum Gases	2006 IPCC default	Emission Factor for European Vehicles [COPERT IV Model]	Vehicle Technology/Class: pre-ECE (For details, consult COPERT iV Model)	Driving Condition: Rural				35	mg/km	Equation 3.2.5 in Volume 2 of the 2006 IPCC Guidelines for National Greenhouse Gas Inventories		Ntziachristos, L. and Samaras, Z. (2005) Personal communication based on draft COPERT IV. Laboratory of Applied Thermodynamics, Aristotle Unviversity Thessaloniki, P.O. Box 458, GR 54124, Thessaloniki, GREECE	2006 IPCC Guidelines for National Greenhouse Gas Inventories, Volume 2: Energy, Table 3.2.5	IPCC	35	0.0371596	Component	NG
118824	1A3b1 - Cars	1.A.3.b.i - Cars	METHANE	Liquefied Petroleum Gas (LPG)	Liquefied Petroleum Gases	2006 IPCC default	Emission Factor for European Vehicles [COPERT IV Model]	Vehicle Technology/Class: pre-ECE (For details, consult COPERT iV Model)	Driving Condition: Highway				25	mg/km	Equation 3.2.5 in Volume 2 of the 2006 IPCC Guidelines for National Greenhouse Gas Inventories		Ntziachristos, L. and Samaras, Z. (2005) Personal communication based on draft COPERT IV. Laboratory of Applied Thermodynamics, Aristotle Unviversity Thessaloniki, P.O. Box 458, GR 54124, Thessaloniki, GREECE	2006 IPCC Guidelines for National Greenhouse Gas Inventories, Volume 2: Energy, Table 3.2.5	IPCC	25	0.0265426	Component	NG
118829	1A3b1 - Cars	1.A.3.b.i - Cars	METHANE	Liquefied Petroleum Gas (LPG)	Liquefied Petroleum Gases	2006 IPCC default	Emission Factor for European Vehicles [COPERT IV Model]	Vehicle Technology/Class: Euro 1 (For details, consult COPERT iV Model)	Driving Condition: Urban, Cold				80	mg/km	Equation 3.2.5 in Volume 2 of the 2006 IPCC Guidelines for National Greenhouse Gas Inventories		Ntziachristos, L. and Samaras, Z. (2005) Personal communication based on draft COPERT IV. Laboratory of Applied Thermodynamics, Aristotle Unviversity Thessaloniki, P.O. Box 458, GR 54124, Thessaloniki, GREECE	2006 IPCC Guidelines for National Greenhouse Gas Inventories, Volume 2: Energy, Table 3.2.5	IPCC	80	0.0849363	Component	NG
118830	1A3b1 - Cars	1.A.3.b.i - Cars	METHANE	Liquefied Petroleum Gas (LPG)	Liquefied Petroleum Gases	2006 IPCC default	Emission Factor for European Vehicles [COPERT IV Model]	Vehicle Technology/Class: Euro 1 (For details, consult COPERT iV Model)	Driving Condition: Urban, Hot				80	mg/km	Equation 3.2.5 in Volume 2 of the 2006 IPCC Guidelines for National Greenhouse Gas Inventories		Ntziachristos, L. and Samaras, Z. (2005) Personal communication based on draft COPERT IV. Laboratory of Applied Thermodynamics, Aristotle Unviversity Thessaloniki, P.O. Box 458, GR 54124, Thessaloniki, GREECE	2006 IPCC Guidelines for National Greenhouse Gas Inventories, Volume 2: Energy, Table 3.2.5	IPCC	80	0.0849363	Component	NG
118831	1A3b1 - Cars	1.A.3.b.i - Cars	METHANE	Liquefied Petroleum Gas (LPG)	Liquefied Petroleum Gases	2006 IPCC default	Emission Factor for European Vehicles [COPERT IV Model]	Vehicle Technology/Class: Euro 1 (For details, consult COPERT iV Model)	Driving Condition: Rural				35	mg/km	Equation 3.2.5 in Volume 2 of the 2006 IPCC Guidelines for National Greenhouse Gas Inventories		Ntziachristos, L. and Samaras, Z. (2005) Personal communication based on draft COPERT IV. Laboratory of Applied Thermodynamics, Aristotle Unviversity Thessaloniki, P.O. Box 458, GR 54124, Thessaloniki, GREECE	2006 IPCC Guidelines for National Greenhouse Gas Inventories, Volume 2: Energy, Table 3.2.5	IPCC	35	0.0371596	Component	NG
118832	1A3b1 - Cars	1.A.3.b.i - Cars	METHANE	Liquefied Petroleum Gas (LPG)	Liquefied Petroleum Gases	2006 IPCC default	Emission Factor for European Vehicles [COPERT IV Model]	Vehicle Technology/Class: Euro 1 (For details, consult COPERT iV Model)	Driving Condition: Highway				25	mg/km	Equation 3.2.5 in Volume 2 of the 2006 IPCC Guidelines for National Greenhouse Gas Inventories		Ntziachristos, L. and Samaras, Z. (2005) Personal communication based on draft COPERT IV. Laboratory of Applied Thermodynamics, Aristotle Unviversity Thessaloniki, P.O. Box 458, GR 54124, Thessaloniki, GREECE	2006 IPCC Guidelines for National Greenhouse Gas Inventories, Volume 2: Energy, Table 3.2.5	IPCC	25	0.0265426	Component	NG
118837	1A3b1 - Cars	1.A.3.b.i - Cars	METHANE	Liquefied Petroleum Gas (LPG)	Liquefied Petroleum Gases	2006 IPCC default	Emission Factor for European Vehicles [COPERT IV Model]	Vehicle Technology/Class: Euro 2 (For details, consult COPERT iV Model)	Driving Condition: Urban, Cold				80	mg/km	Equation 3.2.5 in Volume 2 of the 2006 IPCC Guidelines for National Greenhouse Gas Inventories		Ntziachristos, L. and Samaras, Z. (2005) Personal communication based on draft COPERT IV. Laboratory of Applied Thermodynamics, Aristotle Unviversity Thessaloniki, P.O. Box 458, GR 54124, Thessaloniki, GREECE	2006 IPCC Guidelines for National Greenhouse Gas Inventories, Volume 2: Energy, Table 3.2.5	IPCC	80	0.0849363	Component	NG
118838	1A3b1 - Cars	1.A.3.b.i - Cars	METHANE	Liquefied Petroleum Gas (LPG)	Liquefied Petroleum Gases	2006 IPCC default	Emission Factor for European Vehicles [COPERT IV Model]	Vehicle Technology/Class: Euro 2 (For details, consult COPERT iV Model)	Driving Condition: Urban, Hot				80	mg/km	Equation 3.2.5 in Volume 2 of the 2006 IPCC Guidelines for National Greenhouse Gas Inventories		Ntziachristos, L. and Samaras, Z. (2005) Personal communication based on draft COPERT IV. Laboratory of Applied Thermodynamics, Aristotle Unviversity Thessaloniki, P.O. Box 458, GR 54124, Thessaloniki, GREECE	2006 IPCC Guidelines for National Greenhouse Gas Inventories, Volume 2: Energy, Table 3.2.5	IPCC	80	0.0849363	Component	NG
118839	1A3b1 - Cars	1.A.3.b.i - Cars	METHANE	Liquefied Petroleum Gas (LPG)	Liquefied Petroleum Gases	2006 IPCC default	Emission Factor for European Vehicles [COPERT IV Model]	Vehicle Technology/Class: Euro 2 (For details, consult COPERT iV Model)	Driving Condition: Rural				35	mg/km	Equation 3.2.5 in Volume 2 of the 2006 IPCC Guidelines for National Greenhouse Gas Inventories		Ntziachristos, L. and Samaras, Z. (2005) Personal communication based on draft COPERT IV. Laboratory of Applied Thermodynamics, Aristotle Unviversity Thessaloniki, P.O. Box 458, GR 54124, Thessaloniki, GREECE	2006 IPCC Guidelines for National Greenhouse Gas Inventories, Volume 2: Energy, Table 3.2.5	IPCC	35	0.0371596	Component	NG
118840	1A3b1 - Cars	1.A.3.b.i - Cars	METHANE	Liquefied Petroleum Gas (LPG)	Liquefied Petroleum Gases	2006 IPCC default	Emission Factor for European Vehicles [COPERT IV Model]	Vehicle Technology/Class: Euro 2 (For details, consult COPERT iV Model)	Driving Condition: Highway				25	mg/km	Equation 3.2.5 in Volume 2 of the 2006 IPCC Guidelines for National Greenhouse Gas Inventories		Ntziachristos, L. and Samaras, Z. (2005) Personal communication based on draft COPERT IV. Laboratory of Applied Thermodynamics, Aristotle Unviversity Thessaloniki, P.O. Box 458, GR 54124, Thessaloniki, GREECE	2006 IPCC Guidelines for National Greenhouse Gas Inventories, Volume 2: Energy, Table 3.2.5	IPCC	25	0.0265426	Component	NG
118845	1A3b1 - Cars	1.A.3.b.i - Cars	METHANE	Liquefied Petroleum Gas (LPG)	Liquefied Petroleum Gases	2006 IPCC default	Emission Factor for European Vehicles [COPERT IV Model]	Vehicle Technology/Class: Euro 3 and later (For details, consult COPERT iV Model)	Driving Condition: Urban, Cold				80	mg/km	Equation 3.2.5 in Volume 2 of the 2006 IPCC Guidelines for National Greenhouse Gas Inventories		Ntziachristos, L. and Samaras, Z. (2005) Personal communication based on draft COPERT IV. Laboratory of Applied Thermodynamics, Aristotle Unviversity Thessaloniki, P.O. Box 458, GR 54124, Thessaloniki, GREECE	2006 IPCC Guidelines for National Greenhouse Gas Inventories, Volume 2: Energy, Table 3.2.5	IPCC	80	0.0849363	Component	NG
118846	1A3b1 - Cars	1.A.3.b.i - Cars	METHANE	Liquefied Petroleum Gas (LPG)	Liquefied Petroleum Gases	2006 IPCC default	Emission Factor for European Vehicles [COPERT IV Model]	Vehicle Technology/Class: Euro 3 and later (For details, consult COPERT iV Model)	Driving Condition: Urban, Hot				80	mg/km	Equation 3.2.5 in Volume 2 of the 2006 IPCC Guidelines for National Greenhouse Gas Inventories		Ntziachristos, L. and Samaras, Z. (2005) Personal communication based on draft COPERT IV. Laboratory of Applied Thermodynamics, Aristotle Unviversity Thessaloniki, P.O. Box 458, GR 54124, Thessaloniki, GREECE	2006 IPCC Guidelines for National Greenhouse Gas Inventories, Volume 2: Energy, Table 3.2.5	IPCC	80	0.0849363	Component	NG
118847	1A3b1 - Cars	1.A.3.b.i - Cars	METHANE	Liquefied Petroleum Gas (LPG)	Liquefied Petroleum Gases	2006 IPCC default	Emission Factor for European Vehicles [COPERT IV Model]	Vehicle Technology/Class: Euro 3 and later (For details, consult COPERT iV Model)	Driving Condition: Rural				35	mg/km	Equation 3.2.5 in Volume 2 of the 2006 IPCC Guidelines for National Greenhouse Gas Inventories		Ntziachristos, L. and Samaras, Z. (2005) Personal communication based on draft COPERT IV. Laboratory of Applied Thermodynamics, Aristotle Unviversity Thessaloniki, P.O. Box 458, GR 54124, Thessaloniki, GREECE	2006 IPCC Guidelines for National Greenhouse Gas Inventories, Volume 2: Energy, Table 3.2.5	IPCC	35	0.0371596	Component	NG
118848	1A3b1 - Cars	1.A.3.b.i - Cars	METHANE	Liquefied Petroleum Gas (LPG)	Liquefied Petroleum Gases	2006 IPCC default	Emission Factor for European Vehicles [COPERT IV Model]	Vehicle Technology/Class: Euro 3 and later (For details, consult COPERT iV Model)	Driving Condition: Highway				25	mg/km	Equation 3.2.5 in Volume 2 of the 2006 IPCC Guidelines for National Greenhouse Gas Inventories		Ntziachristos, L. and Samaras, Z. (2005) Personal communication based on draft COPERT IV. Laboratory of Applied Thermodynamics, Aristotle Unviversity Thessaloniki, P.O. Box 458, GR 54124, Thessaloniki, GREECE	2006 IPCC Guidelines for National Greenhouse Gas Inventories, Volume 2: Energy, Table 3.2.5	IPCC	25	0.0265426	Component	NG
118853	1A3b2 - Light Duty Trucks	1.A.3.b.ii - Light-duty trucks	METHANE	Motor Gasoline	Motor Gasoline	2006 IPCC default	Emission Factor for European Vehicles [COPERT IV Model]	Vehicle Technology/Class: Pre-Euro (For details, consult COPERT iV Model)	Driving Condition: Urban, Cold				201	mg/km	Equation 3.2.5 in Volume 2 of the 2006 IPCC Guidelines for National Greenhouse Gas Inventories		Ntziachristos, L. and Samaras, Z. (2005) Personal communication based on draft COPERT IV. Laboratory of Applied Thermodynamics, Aristotle Unviversity Thessaloniki, P.O. Box 458, GR 54124, Thessaloniki, GREECE	2006 IPCC Guidelines for National Greenhouse Gas Inventories, Volume 2: Energy, Table 3.2.5	IPCC	201	0.213402	Component	NG
118854	1A3b2 - Light Duty Trucks	1.A.3.b.ii - Light-duty trucks	METHANE	Motor Gasoline	Motor Gasoline	2006 IPCC default	Emission Factor for European Vehicles [COPERT IV Model]	Vehicle Technology/Class: Pre-Euro (For details, consult COPERT iV Model)	Driving Condition: Urban, Hot				131	mg/km	Equation 3.2.5 in Volume 2 of the 2006 IPCC Guidelines for National Greenhouse Gas Inventories		Ntziachristos, L. and Samaras, Z. (2005) Personal communication based on draft COPERT IV. Laboratory of Applied Thermodynamics, Aristotle Unviversity Thessaloniki, P.O. Box 458, GR 54124, Thessaloniki, GREECE	2006 IPCC Guidelines for National Greenhouse Gas Inventories, Volume 2: Energy, Table 3.2.5	IPCC	131	0.139083	Component	NG
118855	1A3b2 - Light Duty Trucks	1.A.3.b.ii - Light-duty trucks	METHANE	Motor Gasoline	Motor Gasoline	2006 IPCC default	Emission Factor for European Vehicles [COPERT IV Model]	Vehicle Technology/Class: Pre-Euro (For details, consult COPERT iV Model)	Driving Condition: Rural				86	mg/km	Equation 3.2.5 in Volume 2 of the 2006 IPCC Guidelines for National Greenhouse Gas Inventories		Ntziachristos, L. and Samaras, Z. (2005) Personal communication based on draft COPERT IV. Laboratory of Applied Thermodynamics, Aristotle Unviversity Thessaloniki, P.O. Box 458, GR 54124, Thessaloniki, GREECE	2006 IPCC Guidelines for National Greenhouse Gas Inventories, Volume 2: Energy, Table 3.2.5	IPCC	86	0.0913065	Component	NG
118856	1A3b2 - Light Duty Trucks	1.A.3.b.ii - Light-duty trucks	METHANE	Motor Gasoline	Motor Gasoline	2006 IPCC default	Emission Factor for European Vehicles [COPERT IV Model]	Vehicle Technology/Class: Pre-Euro (For details, consult COPERT iV Model)	Driving Condition: Highway				41	mg/km	Equation 3.2.5 in Volume 2 of the 2006 IPCC Guidelines for National Greenhouse Gas Inventories		Ntziachristos, L. and Samaras, Z. (2005) Personal communication based on draft COPERT IV. Laboratory of Applied Thermodynamics, Aristotle Unviversity Thessaloniki, P.O. Box 458, GR 54124, Thessaloniki, GREECE	2006 IPCC Guidelines for National Greenhouse Gas Inventories, Volume 2: Energy, Table 3.2.5	IPCC	41	0.0435298	Component	NG
118861	1A3b2 - Light Duty Trucks	1.A.3.b.ii - Light-duty trucks	METHANE	Motor Gasoline	Motor Gasoline	2006 IPCC default	Emission Factor for European Vehicles [COPERT IV Model]	Vehicle Technology/Class: Euro 1 (For details, consult COPERT iV Model)	Driving Condition: Urban, Cold				45	mg/km	Equation 3.2.5 in Volume 2 of the 2006 IPCC Guidelines for National Greenhouse Gas Inventories		Ntziachristos, L. and Samaras, Z. (2005) Personal communication based on draft COPERT IV. Laboratory of Applied Thermodynamics, Aristotle Unviversity Thessaloniki, P.O. Box 458, GR 54124, Thessaloniki, GREECE	2006 IPCC Guidelines for National Greenhouse Gas Inventories, Volume 2: Energy, Table 3.2.5	IPCC	45	0.0477766	Component	NG
118862	1A3b2 - Light Duty Trucks	1.A.3.b.ii - Light-duty trucks	METHANE	Motor Gasoline	Motor Gasoline	2006 IPCC default	Emission Factor for European Vehicles [COPERT IV Model]	Vehicle Technology/Class: Euro 1 (For details, consult COPERT iV Model)	Driving Condition: Urban, Hot				26	mg/km	Equation 3.2.5 in Volume 2 of the 2006 IPCC Guidelines for National Greenhouse Gas Inventories		Ntziachristos, L. and Samaras, Z. (2005) Personal communication based on draft COPERT IV. Laboratory of Applied Thermodynamics, Aristotle Unviversity Thessaloniki, P.O. Box 458, GR 54124, Thessaloniki, GREECE	2006 IPCC Guidelines for National Greenhouse Gas Inventories, Volume 2: Energy, Table 3.2.5	IPCC	26	0.0276043	Component	NG
118863	1A3b2 - Light Duty Trucks	1.A.3.b.ii - Light-duty trucks	METHANE	Motor Gasoline	Motor Gasoline	2006 IPCC default	Emission Factor for European Vehicles [COPERT IV Model]	Vehicle Technology/Class: Euro 1 (For details, consult COPERT iV Model)	Driving Condition: Rural				16	mg/km	Equation 3.2.5 in Volume 2 of the 2006 IPCC Guidelines for National Greenhouse Gas Inventories		Ntziachristos, L. and Samaras, Z. (2005) Personal communication based on draft COPERT IV. Laboratory of Applied Thermodynamics, Aristotle Unviversity Thessaloniki, P.O. Box 458, GR 54124, Thessaloniki, GREECE	2006 IPCC Guidelines for National Greenhouse Gas Inventories, Volume 2: Energy, Table 3.2.5	IPCC	16	0.0169873	Component	NG
118864	1A3b2 - Light Duty Trucks	1.A.3.b.ii - Light-duty trucks	METHANE	Motor Gasoline	Motor Gasoline	2006 IPCC default	Emission Factor for European Vehicles [COPERT IV Model]	Vehicle Technology/Class: Euro 1 (For details, consult COPERT iV Model)	Driving Condition: Highway				14	mg/km	Equation 3.2.5 in Volume 2 of the 2006 IPCC Guidelines for National Greenhouse Gas Inventories		Ntziachristos, L. and Samaras, Z. (2005) Personal communication based on draft COPERT IV. Laboratory of Applied Thermodynamics, Aristotle Unviversity Thessaloniki, P.O. Box 458, GR 54124, Thessaloniki, GREECE	2006 IPCC Guidelines for National Greenhouse Gas Inventories, Volume 2: Energy, Table 3.2.5	IPCC	14	0.0148638	Component	NG
118869	1A3b2 - Light Duty Trucks	1.A.3.b.ii - Light-duty trucks	METHANE	Motor Gasoline	Motor Gasoline	2006 IPCC default	Emission Factor for European Vehicles [COPERT IV Model]	Vehicle Technology/Class: Euro 2 (For details, consult COPERT iV Model)	Driving Condition: Urban, Cold				94	mg/km	Equation 3.2.5 in Volume 2 of the 2006 IPCC Guidelines for National Greenhouse Gas Inventories		Ntziachristos, L. and Samaras, Z. (2005) Personal communication based on draft COPERT IV. Laboratory of Applied Thermodynamics, Aristotle Unviversity Thessaloniki, P.O. Box 458, GR 54124, Thessaloniki, GREECE	2006 IPCC Guidelines for National Greenhouse Gas Inventories, Volume 2: Energy, Table 3.2.5	IPCC	94	0.0998001	Component	NG
118870	1A3b2 - Light Duty Trucks	1.A.3.b.ii - Light-duty trucks	METHANE	Motor Gasoline	Motor Gasoline	2006 IPCC default	Emission Factor for European Vehicles [COPERT IV Model]	Vehicle Technology/Class: Euro 2 (For details, consult COPERT iV Model)	Driving Condition: Urban, Hot				17	mg/km	Equation 3.2.5 in Volume 2 of the 2006 IPCC Guidelines for National Greenhouse Gas Inventories		Ntziachristos, L. and Samaras, Z. (2005) Personal communication based on draft COPERT IV. Laboratory of Applied Thermodynamics, Aristotle Unviversity Thessaloniki, P.O. Box 458, GR 54124, Thessaloniki, GREECE	2006 IPCC Guidelines for National Greenhouse Gas Inventories, Volume 2: Energy, Table 3.2.5	IPCC	17	0.018049	Component	NG
118871	1A3b2 - Light Duty Trucks	1.A.3.b.ii - Light-duty trucks	METHANE	Motor Gasoline	Motor Gasoline	2006 IPCC default	Emission Factor for European Vehicles [COPERT IV Model]	Vehicle Technology/Class: Euro 2 (For details, consult COPERT iV Model)	Driving Condition: Rural				13	mg/km	Equation 3.2.5 in Volume 2 of the 2006 IPCC Guidelines for National Greenhouse Gas Inventories		Ntziachristos, L. and Samaras, Z. (2005) Personal communication based on draft COPERT IV. Laboratory of Applied Thermodynamics, Aristotle Unviversity Thessaloniki, P.O. Box 458, GR 54124, Thessaloniki, GREECE	2006 IPCC Guidelines for National Greenhouse Gas Inventories, Volume 2: Energy, Table 3.2.5	IPCC	13	0.0138021	Component	NG
118872	1A3b2 - Light Duty Trucks	1.A.3.b.ii - Light-duty trucks	METHANE	Motor Gasoline	Motor Gasoline	2006 IPCC default	Emission Factor for European Vehicles [COPERT IV Model]	Vehicle Technology/Class: Euro 2 (For details, consult COPERT iV Model)	Driving Condition: Highway				11	mg/km	Equation 3.2.5 in Volume 2 of the 2006 IPCC Guidelines for National Greenhouse Gas Inventories		Ntziachristos, L. and Samaras, Z. (2005) Personal communication based on draft COPERT IV. Laboratory of Applied Thermodynamics, Aristotle Unviversity Thessaloniki, P.O. Box 458, GR 54124, Thessaloniki, GREECE	2006 IPCC Guidelines for National Greenhouse Gas Inventories, Volume 2: Energy, Table 3.2.5	IPCC	11	0.0116787	Component	NG
118877	1A3b2 - Light Duty Trucks	1.A.3.b.ii - Light-duty trucks	METHANE	Motor Gasoline	Motor Gasoline	2006 IPCC default	Emission Factor for European Vehicles [COPERT IV Model]	Vehicle Technology/Class: Euro 3 (For details, consult COPERT iV Model)	Driving Condition: Urban, Cold				83	mg/km	Equation 3.2.5 in Volume 2 of the 2006 IPCC Guidelines for National Greenhouse Gas Inventories		Ntziachristos, L. and Samaras, Z. (2005) Personal communication based on draft COPERT IV. Laboratory of Applied Thermodynamics, Aristotle Unviversity Thessaloniki, P.O. Box 458, GR 54124, Thessaloniki, GREECE	2006 IPCC Guidelines for National Greenhouse Gas Inventories, Volume 2: Energy, Table 3.2.5	IPCC	83	0.0881214	Component	NG
118878	1A3b2 - Light Duty Trucks	1.A.3.b.ii - Light-duty trucks	METHANE	Motor Gasoline	Motor Gasoline	2006 IPCC default	Emission Factor for European Vehicles [COPERT IV Model]	Vehicle Technology/Class: Euro 3 (For details, consult COPERT iV Model)	Driving Condition: Urban, Hot				3	mg/km	Equation 3.2.5 in Volume 2 of the 2006 IPCC Guidelines for National Greenhouse Gas Inventories		Ntziachristos, L. and Samaras, Z. (2005) Personal communication based on draft COPERT IV. Laboratory of Applied Thermodynamics, Aristotle Unviversity Thessaloniki, P.O. Box 458, GR 54124, Thessaloniki, GREECE	2006 IPCC Guidelines for National Greenhouse Gas Inventories, Volume 2: Energy, Table 3.2.5	IPCC	3	0.00318511	Component	NG
118879	1A3b2 - Light Duty Trucks	1.A.3.b.ii - Light-duty trucks	METHANE	Motor Gasoline	Motor Gasoline	2006 IPCC default	Emission Factor for European Vehicles [COPERT IV Model]	Vehicle Technology/Class: Euro 3 (For details, consult COPERT iV Model)	Driving Condition: Rural				2	mg/km	Equation 3.2.5 in Volume 2 of the 2006 IPCC Guidelines for National Greenhouse Gas Inventories		Ntziachristos, L. and Samaras, Z. (2005) Personal communication based on draft COPERT IV. Laboratory of Applied Thermodynamics, Aristotle Unviversity Thessaloniki, P.O. Box 458, GR 54124, Thessaloniki, GREECE	2006 IPCC Guidelines for National Greenhouse Gas Inventories, Volume 2: Energy, Table 3.2.5	IPCC	2	0.00212341	Component	NG
118880	1A3b2 - Light Duty Trucks	1.A.3.b.ii - Light-duty trucks	METHANE	Motor Gasoline	Motor Gasoline	2006 IPCC default	Emission Factor for European Vehicles [COPERT IV Model]	Vehicle Technology/Class: Euro 3 (For details, consult COPERT iV Model)	Driving Condition: Highway				4	mg/km	Equation 3.2.5 in Volume 2 of the 2006 IPCC Guidelines for National Greenhouse Gas Inventories		Ntziachristos, L. and Samaras, Z. (2005) Personal communication based on draft COPERT IV. Laboratory of Applied Thermodynamics, Aristotle Unviversity Thessaloniki, P.O. Box 458, GR 54124, Thessaloniki, GREECE	2006 IPCC Guidelines for National Greenhouse Gas Inventories, Volume 2: Energy, Table 3.2.5	IPCC	4	0.00424681	Component	NG
118885	1A3b2 - Light Duty Trucks	1.A.3.b.ii - Light-duty trucks	METHANE	Motor Gasoline	Motor Gasoline	2006 IPCC default	Emission Factor for European Vehicles [COPERT IV Model]	Vehicle Technology/Class: Euro 4 (For details, consult COPERT iV Model)	Driving Condition: Urban, Cold				57	mg/km	Equation 3.2.5 in Volume 2 of the 2006 IPCC Guidelines for National Greenhouse Gas Inventories		Ntziachristos, L. and Samaras, Z. (2005) Personal communication based on draft COPERT IV. Laboratory of Applied Thermodynamics, Aristotle Unviversity Thessaloniki, P.O. Box 458, GR 54124, Thessaloniki, GREECE	2006 IPCC Guidelines for National Greenhouse Gas Inventories, Volume 2: Energy, Table 3.2.5	IPCC	57	0.0605171	Component	NG
118886	1A3b2 - Light Duty Trucks	1.A.3.b.ii - Light-duty trucks	METHANE	Motor Gasoline	Motor Gasoline	2006 IPCC default	Emission Factor for European Vehicles [COPERT IV Model]	Vehicle Technology/Class: Euro 4 (For details, consult COPERT iV Model)	Driving Condition: Urban, Hot				2	mg/km	Equation 3.2.5 in Volume 2 of the 2006 IPCC Guidelines for National Greenhouse Gas Inventories		Ntziachristos, L. and Samaras, Z. (2005) Personal communication based on draft COPERT IV. Laboratory of Applied Thermodynamics, Aristotle Unviversity Thessaloniki, P.O. Box 458, GR 54124, Thessaloniki, GREECE	2006 IPCC Guidelines for National Greenhouse Gas Inventories, Volume 2: Energy, Table 3.2.5	IPCC	2	0.00212341	Component	NG
118887	1A3b2 - Light Duty Trucks	1.A.3.b.ii - Light-duty trucks	METHANE	Motor Gasoline	Motor Gasoline	2006 IPCC default	Emission Factor for European Vehicles [COPERT IV Model]	Vehicle Technology/Class: Euro 4 (For details, consult COPERT iV Model)	Driving Condition: Rural				2	mg/km	Equation 3.2.5 in Volume 2 of the 2006 IPCC Guidelines for National Greenhouse Gas Inventories		Ntziachristos, L. and Samaras, Z. (2005) Personal communication based on draft COPERT IV. Laboratory of Applied Thermodynamics, Aristotle Unviversity Thessaloniki, P.O. Box 458, GR 54124, Thessaloniki, GREECE	2006 IPCC Guidelines for National Greenhouse Gas Inventories, Volume 2: Energy, Table 3.2.5	IPCC	2	0.00212341	Component	NG
118888	1A3b2 - Light Duty Trucks	1.A.3.b.ii - Light-duty trucks	METHANE	Motor Gasoline	Motor Gasoline	2006 IPCC default	Emission Factor for European Vehicles [COPERT IV Model]	Vehicle Technology/Class: Euro 4 (For details, consult COPERT iV Model)	Driving Condition: Highway				0	mg/km	Equation 3.2.5 in Volume 2 of the 2006 IPCC Guidelines for National Greenhouse Gas Inventories		Ntziachristos, L. and Samaras, Z. (2005) Personal communication based on draft COPERT IV. Laboratory of Applied Thermodynamics, Aristotle Unviversity Thessaloniki, P.O. Box 458, GR 54124, Thessaloniki, GREECE	2006 IPCC Guidelines for National Greenhouse Gas Inventories, Volume 2: Energy, Table 3.2.5	IPCC	0	0	Component	NG
118893	1A3b2 - Light Duty Trucks	1.A.3.b.ii - Light-duty trucks	METHANE	Diesel Oil	Diesel Oil	2006 IPCC default	Emission Factor for European Vehicles [COPERT IV Model]	Vehicle Technology/Class: Pre-Euro (For details, consult COPERT iV Model)	Driving Condition: Urban, Cold				22	mg/km	Equation 3.2.5 in Volume 2 of the 2006 IPCC Guidelines for National Greenhouse Gas Inventories		Ntziachristos, L. and Samaras, Z. (2005) Personal communication based on draft COPERT IV. Laboratory of Applied Thermodynamics, Aristotle Unviversity Thessaloniki, P.O. Box 458, GR 54124, Thessaloniki, GREECE	2006 IPCC Guidelines for National Greenhouse Gas Inventories, Volume 2: Energy, Table 3.2.5	IPCC	22	0.0233575	Component	NG
118894	1A3b2 - Light Duty Trucks	1.A.3.b.ii - Light-duty trucks	METHANE	Diesel Oil	Diesel Oil	2006 IPCC default	Emission Factor for European Vehicles [COPERT IV Model]	Vehicle Technology/Class: Pre-Euro (For details, consult COPERT iV Model)	Driving Condition: Urban, Hot				28	mg/km	Equation 3.2.5 in Volume 2 of the 2006 IPCC Guidelines for National Greenhouse Gas Inventories		Ntziachristos, L. and Samaras, Z. (2005) Personal communication based on draft COPERT IV. Laboratory of Applied Thermodynamics, Aristotle Unviversity Thessaloniki, P.O. Box 458, GR 54124, Thessaloniki, GREECE	2006 IPCC Guidelines for National Greenhouse Gas Inventories, Volume 2: Energy, Table 3.2.5	IPCC	28	0.0297277	Component	NG
118895	1A3b2 - Light Duty Trucks	1.A.3.b.ii - Light-duty trucks	METHANE	Diesel Oil	Diesel Oil	2006 IPCC default	Emission Factor for European Vehicles [COPERT IV Model]	Vehicle Technology/Class: Pre-Euro (For details, consult COPERT iV Model)	Driving Condition: Rural				12	mg/km	Equation 3.2.5 in Volume 2 of the 2006 IPCC Guidelines for National Greenhouse Gas Inventories		Ntziachristos, L. and Samaras, Z. (2005) Personal communication based on draft COPERT IV. Laboratory of Applied Thermodynamics, Aristotle Unviversity Thessaloniki, P.O. Box 458, GR 54124, Thessaloniki, GREECE	2006 IPCC Guidelines for National Greenhouse Gas Inventories, Volume 2: Energy, Table 3.2.5	IPCC	12	0.0127404	Component	NG
118896	1A3b2 - Light Duty Trucks	1.A.3.b.ii - Light-duty trucks	METHANE	Diesel Oil	Diesel Oil	2006 IPCC default	Emission Factor for European Vehicles [COPERT IV Model]	Vehicle Technology/Class: Pre-Euro (For details, consult COPERT iV Model)	Driving Condition: Highway				8	mg/km	Equation 3.2.5 in Volume 2 of the 2006 IPCC Guidelines for National Greenhouse Gas Inventories		Ntziachristos, L. and Samaras, Z. (2005) Personal communication based on draft COPERT IV. Laboratory of Applied Thermodynamics, Aristotle Unviversity Thessaloniki, P.O. Box 458, GR 54124, Thessaloniki, GREECE	2006 IPCC Guidelines for National Greenhouse Gas Inventories, Volume 2: Energy, Table 3.2.5	IPCC	8	0.00849363	Component	NG
118901	1A3b2 - Light Duty Trucks	1.A.3.b.ii - Light-duty trucks	METHANE	Diesel Oil	Diesel Oil	2006 IPCC default	Emission Factor for European Vehicles [COPERT IV Model]	Vehicle Technology/Class: Euro 1 (For details, consult COPERT iV Model)	Driving Condition: Urban, Cold				18	mg/km	Equation 3.2.5 in Volume 2 of the 2006 IPCC Guidelines for National Greenhouse Gas Inventories		Ntziachristos, L. and Samaras, Z. (2005) Personal communication based on draft COPERT IV. Laboratory of Applied Thermodynamics, Aristotle Unviversity Thessaloniki, P.O. Box 458, GR 54124, Thessaloniki, GREECE	2006 IPCC Guidelines for National Greenhouse Gas Inventories, Volume 2: Energy, Table 3.2.5	IPCC	18	0.0191107	Component	NG
118902	1A3b2 - Light Duty Trucks	1.A.3.b.ii - Light-duty trucks	METHANE	Diesel Oil	Diesel Oil	2006 IPCC default	Emission Factor for European Vehicles [COPERT IV Model]	Vehicle Technology/Class: Euro 1 (For details, consult COPERT iV Model)	Driving Condition: Urban, Hot				11	mg/km	Equation 3.2.5 in Volume 2 of the 2006 IPCC Guidelines for National Greenhouse Gas Inventories		Ntziachristos, L. and Samaras, Z. (2005) Personal communication based on draft COPERT IV. Laboratory of Applied Thermodynamics, Aristotle Unviversity Thessaloniki, P.O. Box 458, GR 54124, Thessaloniki, GREECE	2006 IPCC Guidelines for National Greenhouse Gas Inventories, Volume 2: Energy, Table 3.2.5	IPCC	11	0.0116787	Component	NG
118903	1A3b2 - Light Duty Trucks	1.A.3.b.ii - Light-duty trucks	METHANE	Diesel Oil	Diesel Oil	2006 IPCC default	Emission Factor for European Vehicles [COPERT IV Model]	Vehicle Technology/Class: Euro 1 (For details, consult COPERT iV Model)	Driving Condition: Rural				9	mg/km	Equation 3.2.5 in Volume 2 of the 2006 IPCC Guidelines for National Greenhouse Gas Inventories		Ntziachristos, L. and Samaras, Z. (2005) Personal communication based on draft COPERT IV. Laboratory of Applied Thermodynamics, Aristotle Unviversity Thessaloniki, P.O. Box 458, GR 54124, Thessaloniki, GREECE	2006 IPCC Guidelines for National Greenhouse Gas Inventories, Volume 2: Energy, Table 3.2.5	IPCC	9	0.00955533	Component	NG
118904	1A3b2 - Light Duty Trucks	1.A.3.b.ii - Light-duty trucks	METHANE	Diesel Oil	Diesel Oil	2006 IPCC default	Emission Factor for European Vehicles [COPERT IV Model]	Vehicle Technology/Class: Euro 1 (For details, consult COPERT iV Model)	Driving Condition: Highway				3	mg/km	Equation 3.2.5 in Volume 2 of the 2006 IPCC Guidelines for National Greenhouse Gas Inventories		Ntziachristos, L. and Samaras, Z. (2005) Personal communication based on draft COPERT IV. Laboratory of Applied Thermodynamics, Aristotle Unviversity Thessaloniki, P.O. Box 458, GR 54124, Thessaloniki, GREECE	2006 IPCC Guidelines for National Greenhouse Gas Inventories, Volume 2: Energy, Table 3.2.5	IPCC	3	0.00318511	Component	NG
118909	1A3b2 - Light Duty Trucks	1.A.3.b.ii - Light-duty trucks	METHANE	Diesel Oil	Diesel Oil	2006 IPCC default	Emission Factor for European Vehicles [COPERT IV Model]	Vehicle Technology/Class: Euro 2 (For details, consult COPERT iV Model)	Driving Condition: Urban, Cold				6	mg/km	Equation 3.2.5 in Volume 2 of the 2006 IPCC Guidelines for National Greenhouse Gas Inventories		Ntziachristos, L. and Samaras, Z. (2005) Personal communication based on draft COPERT IV. Laboratory of Applied Thermodynamics, Aristotle Unviversity Thessaloniki, P.O. Box 458, GR 54124, Thessaloniki, GREECE	2006 IPCC Guidelines for National Greenhouse Gas Inventories, Volume 2: Energy, Table 3.2.5	IPCC	6	0.00637022	Component	NG
118910	1A3b2 - Light Duty Trucks	1.A.3.b.ii - Light-duty trucks	METHANE	Diesel Oil	Diesel Oil	2006 IPCC default	Emission Factor for European Vehicles [COPERT IV Model]	Vehicle Technology/Class: Euro 2 (For details, consult COPERT iV Model)	Driving Condition: Urban, Hot				7	mg/km	Equation 3.2.5 in Volume 2 of the 2006 IPCC Guidelines for National Greenhouse Gas Inventories		Ntziachristos, L. and Samaras, Z. (2005) Personal communication based on draft COPERT IV. Laboratory of Applied Thermodynamics, Aristotle Unviversity Thessaloniki, P.O. Box 458, GR 54124, Thessaloniki, GREECE	2006 IPCC Guidelines for National Greenhouse Gas Inventories, Volume 2: Energy, Table 3.2.5	IPCC	7	0.00743192	Component	NG
118911	1A3b2 - Light Duty Trucks	1.A.3.b.ii - Light-duty trucks	METHANE	Diesel Oil	Diesel Oil	2006 IPCC default	Emission Factor for European Vehicles [COPERT IV Model]	Vehicle Technology/Class: Euro 2 (For details, consult COPERT iV Model)	Driving Condition: Rural				3	mg/km	Equation 3.2.5 in Volume 2 of the 2006 IPCC Guidelines for National Greenhouse Gas Inventories		Ntziachristos, L. and Samaras, Z. (2005) Personal communication based on draft COPERT IV. Laboratory of Applied Thermodynamics, Aristotle Unviversity Thessaloniki, P.O. Box 458, GR 54124, Thessaloniki, GREECE	2006 IPCC Guidelines for National Greenhouse Gas Inventories, Volume 2: Energy, Table 3.2.5	IPCC	3	0.00318511	Component	NG
118912	1A3b2 - Light Duty Trucks	1.A.3.b.ii - Light-duty trucks	METHANE	Diesel Oil	Diesel Oil	2006 IPCC default	Emission Factor for European Vehicles [COPERT IV Model]	Vehicle Technology/Class: Euro 2 (For details, consult COPERT iV Model)	Driving Condition: Highway				2	mg/km	Equation 3.2.5 in Volume 2 of the 2006 IPCC Guidelines for National Greenhouse Gas Inventories		Ntziachristos, L. and Samaras, Z. (2005) Personal communication based on draft COPERT IV. Laboratory of Applied Thermodynamics, Aristotle Unviversity Thessaloniki, P.O. Box 458, GR 54124, Thessaloniki, GREECE	2006 IPCC Guidelines for National Greenhouse Gas Inventories, Volume 2: Energy, Table 3.2.5	IPCC	2	0.00212341	Component	NG
118917	1A3b2 - Light Duty Trucks	1.A.3.b.ii - Light-duty trucks	METHANE	Diesel Oil	Diesel Oil	2006 IPCC default	Emission Factor for European Vehicles [COPERT IV Model]	Vehicle Technology/Class: Euro 3 (For details, consult COPERT iV Model)	Driving Condition: Urban, Cold				7	mg/km	Equation 3.2.5 in Volume 2 of the 2006 IPCC Guidelines for National Greenhouse Gas Inventories		Ntziachristos, L. and Samaras, Z. (2005) Personal communication based on draft COPERT IV. Laboratory of Applied Thermodynamics, Aristotle Unviversity Thessaloniki, P.O. Box 458, GR 54124, Thessaloniki, GREECE	2006 IPCC Guidelines for National Greenhouse Gas Inventories, Volume 2: Energy, Table 3.2.5	IPCC	7	0.00743192	Component	NG
118918	1A3b2 - Light Duty Trucks	1.A.3.b.ii - Light-duty trucks	METHANE	Diesel Oil	Diesel Oil	2006 IPCC default	Emission Factor for European Vehicles [COPERT IV Model]	Vehicle Technology/Class: Euro 3 (For details, consult COPERT iV Model)	Driving Condition: Urban, Hot				3	mg/km	Equation 3.2.5 in Volume 2 of the 2006 IPCC Guidelines for National Greenhouse Gas Inventories		Ntziachristos, L. and Samaras, Z. (2005) Personal communication based on draft COPERT IV. Laboratory of Applied Thermodynamics, Aristotle Unviversity Thessaloniki, P.O. Box 458, GR 54124, Thessaloniki, GREECE	2006 IPCC Guidelines for National Greenhouse Gas Inventories, Volume 2: Energy, Table 3.2.5	IPCC	3	0.00318511	Component	NG
118919	1A3b2 - Light Duty Trucks	1.A.3.b.ii - Light-duty trucks	METHANE	Diesel Oil	Diesel Oil	2006 IPCC default	Emission Factor for European Vehicles [COPERT IV Model]	Vehicle Technology/Class: Euro 3 (For details, consult COPERT iV Model)	Driving Condition: Rural				0	mg/km	Equation 3.2.5 in Volume 2 of the 2006 IPCC Guidelines for National Greenhouse Gas Inventories		Ntziachristos, L. and Samaras, Z. (2005) Personal communication based on draft COPERT IV. Laboratory of Applied Thermodynamics, Aristotle Unviversity Thessaloniki, P.O. Box 458, GR 54124, Thessaloniki, GREECE	2006 IPCC Guidelines for National Greenhouse Gas Inventories, Volume 2: Energy, Table 3.2.5	IPCC	0	0	Component	NG
118920	1A3b2 - Light Duty Trucks	1.A.3.b.ii - Light-duty trucks	METHANE	Diesel Oil	Diesel Oil	2006 IPCC default	Emission Factor for European Vehicles [COPERT IV Model]	Vehicle Technology/Class: Euro 3 (For details, consult COPERT iV Model)	Driving Condition: Highway				0	mg/km	Equation 3.2.5 in Volume 2 of the 2006 IPCC Guidelines for National Greenhouse Gas Inventories		Ntziachristos, L. and Samaras, Z. (2005) Personal communication based on draft COPERT IV. Laboratory of Applied Thermodynamics, Aristotle Unviversity Thessaloniki, P.O. Box 458, GR 54124, Thessaloniki, GREECE	2006 IPCC Guidelines for National Greenhouse Gas Inventories, Volume 2: Energy, Table 3.2.5	IPCC	0	0	Component	NG
118925	1A3b2 - Light Duty Trucks	1.A.3.b.ii - Light-duty trucks	METHANE	Diesel Oil	Diesel Oil	2006 IPCC default	Emission Factor for European Vehicles [COPERT IV Model]	Vehicle Technology/Class: Euro 4 (For details, consult COPERT iV Model)	Driving Condition: Urban, Cold				0	mg/km	Equation 3.2.5 in Volume 2 of the 2006 IPCC Guidelines for National Greenhouse Gas Inventories		Ntziachristos, L. and Samaras, Z. (2005) Personal communication based on draft COPERT IV. Laboratory of Applied Thermodynamics, Aristotle Unviversity Thessaloniki, P.O. Box 458, GR 54124, Thessaloniki, GREECE	2006 IPCC Guidelines for National Greenhouse Gas Inventories, Volume 2: Energy, Table 3.2.5	IPCC	0	0	Component	NG
118926	1A3b2 - Light Duty Trucks	1.A.3.b.ii - Light-duty trucks	METHANE	Diesel Oil	Diesel Oil	2006 IPCC default	Emission Factor for European Vehicles [COPERT IV Model]	Vehicle Technology/Class: Euro 4 (For details, consult COPERT iV Model)	Driving Condition: Urban, Hot				0	mg/km	Equation 3.2.5 in Volume 2 of the 2006 IPCC Guidelines for National Greenhouse Gas Inventories		Ntziachristos, L. and Samaras, Z. (2005) Personal communication based on draft COPERT IV. Laboratory of Applied Thermodynamics, Aristotle Unviversity Thessaloniki, P.O. Box 458, GR 54124, Thessaloniki, GREECE	2006 IPCC Guidelines for National Greenhouse Gas Inventories, Volume 2: Energy, Table 3.2.5	IPCC	0	0	Component	NG
118927	1A3b2 - Light Duty Trucks	1.A.3.b.ii - Light-duty trucks	METHANE	Diesel Oil	Diesel Oil	2006 IPCC default	Emission Factor for European Vehicles [COPERT IV Model]	Vehicle Technology/Class: Euro 4 (For details, consult COPERT iV Model)	Driving Condition: Rural				0	mg/km	Equation 3.2.5 in Volume 2 of the 2006 IPCC Guidelines for National Greenhouse Gas Inventories		Ntziachristos, L. and Samaras, Z. (2005) Personal communication based on draft COPERT IV. Laboratory of Applied Thermodynamics, Aristotle Unviversity Thessaloniki, P.O. Box 458, GR 54124, Thessaloniki, GREECE	2006 IPCC Guidelines for National Greenhouse Gas Inventories, Volume 2: Energy, Table 3.2.5	IPCC	0	0	Component	NG
118928	1A3b2 - Light Duty Trucks	1.A.3.b.ii - Light-duty trucks	METHANE	Diesel Oil	Diesel Oil	2006 IPCC default	Emission Factor for European Vehicles [COPERT IV Model]	Vehicle Technology/Class: Euro 4 (For details, consult COPERT iV Model)	Driving Condition: Highway				0	mg/km	Equation 3.2.5 in Volume 2 of the 2006 IPCC Guidelines for National Greenhouse Gas Inventories		Ntziachristos, L. and Samaras, Z. (2005) Personal communication based on draft COPERT IV. Laboratory of Applied Thermodynamics, Aristotle Unviversity Thessaloniki, P.O. Box 458, GR 54124, Thessaloniki, GREECE	2006 IPCC Guidelines for National Greenhouse Gas Inventories, Volume 2: Energy, Table 3.2.5	IPCC	0	0	Component	NG
118932	1A3b3 - Heavy Duty Trucks and Buses	1.A.3.b.iii - Heavy-duty trucks and buses	METHANE	Motor Gasoline	Motor Gasoline	2006 IPCC default	Emission Factor for European Vehicles [COPERT IV Model]	Vehicle Technology/Class: All technologies (For details, consult COPERT iV Model)	Driving Condition: Urban				140	mg/km	Equation 3.2.5 in Volume 2 of the 2006 IPCC Guidelines for National Greenhouse Gas Inventories		Ntziachristos, L. and Samaras, Z. (2005) Personal communication based on draft COPERT IV. Laboratory of Applied Thermodynamics, Aristotle Unviversity Thessaloniki, P.O. Box 458, GR 54124, Thessaloniki, GREECE	2006 IPCC Guidelines for National Greenhouse Gas Inventories, Volume 2: Energy, Table 3.2.5	IPCC	140	0.148638	Component	NG
118933	1A3b3 - Heavy Duty Trucks and Buses	1.A.3.b.iii - Heavy-duty trucks and buses	METHANE	Motor Gasoline	Motor Gasoline	2006 IPCC default	Emission Factor for European Vehicles [COPERT IV Model]	Vehicle Technology/Class: All technologies (For details, consult COPERT iV Model)	Driving Condition: Rural				110	mg/km	Equation 3.2.5 in Volume 2 of the 2006 IPCC Guidelines for National Greenhouse Gas Inventories		Ntziachristos, L. and Samaras, Z. (2005) Personal communication based on draft COPERT IV. Laboratory of Applied Thermodynamics, Aristotle Unviversity Thessaloniki, P.O. Box 458, GR 54124, Thessaloniki, GREECE	2006 IPCC Guidelines for National Greenhouse Gas Inventories, Volume 2: Energy, Table 3.2.5	IPCC	110	0.116787	Component	NG
118934	1A3b3 - Heavy Duty Trucks and Buses	1.A.3.b.iii - Heavy-duty trucks and buses	METHANE	Motor Gasoline	Motor Gasoline	2006 IPCC default	Emission Factor for European Vehicles [COPERT IV Model]	Vehicle Technology/Class: All technologies (For details, consult COPERT iV Model)	Driving Condition: Highway				70	mg/km	Equation 3.2.5 in Volume 2 of the 2006 IPCC Guidelines for National Greenhouse Gas Inventories		Ntziachristos, L. and Samaras, Z. (2005) Personal communication based on draft COPERT IV. Laboratory of Applied Thermodynamics, Aristotle Unviversity Thessaloniki, P.O. Box 458, GR 54124, Thessaloniki, GREECE	2006 IPCC Guidelines for National Greenhouse Gas Inventories, Volume 2: Energy, Table 3.2.5	IPCC	70	0.0743192	Component	NG
118938	1A3b3 - Heavy Duty Trucks and Buses	1.A.3.b.iii - Heavy-duty trucks and buses	METHANE	Diesel Oil	Diesel Oil	2006 IPCC default	Emission Factor for European Vehicles [COPERT IV Model]	Vehicle Technology/Class: GVW &lt; 16t (For details, consult COPERT iV Model)	Driving Condition: Urban				85	mg/km	Equation 3.2.5 in Volume 2 of the 2006 IPCC Guidelines for National Greenhouse Gas Inventories		Ntziachristos, L. and Samaras, Z. (2005) Personal communication based on draft COPERT IV. Laboratory of Applied Thermodynamics, Aristotle Unviversity Thessaloniki, P.O. Box 458, GR 54124, Thessaloniki, GREECE	2006 IPCC Guidelines for National Greenhouse Gas Inventories, Volume 2: Energy, Table 3.2.5	IPCC	85	0.0902448	Component	NG
118939	1A3b3 - Heavy Duty Trucks and Buses	1.A.3.b.iii - Heavy-duty trucks and buses	METHANE	Diesel Oil	Diesel Oil	2006 IPCC default	Emission Factor for European Vehicles [COPERT IV Model]	Vehicle Technology/Class: GVW &lt; 16t (For details, consult COPERT iV Model)	Driving Condition: Rural				23	mg/km	Equation 3.2.5 in Volume 2 of the 2006 IPCC Guidelines for National Greenhouse Gas Inventories		Ntziachristos, L. and Samaras, Z. (2005) Personal communication based on draft COPERT IV. Laboratory of Applied Thermodynamics, Aristotle Unviversity Thessaloniki, P.O. Box 458, GR 54124, Thessaloniki, GREECE	2006 IPCC Guidelines for National Greenhouse Gas Inventories, Volume 2: Energy, Table 3.2.5	IPCC	23	0.0244192	Component	NG
118940	1A3b3 - Heavy Duty Trucks and Buses	1.A.3.b.iii - Heavy-duty trucks and buses	METHANE	Diesel Oil	Diesel Oil	2006 IPCC default	Emission Factor for European Vehicles [COPERT IV Model]	Vehicle Technology/Class: GVW &lt; 16t (For details, consult COPERT iV Model)	Driving Condition: Highway				20	mg/km	Equation 3.2.5 in Volume 2 of the 2006 IPCC Guidelines for National Greenhouse Gas Inventories		Ntziachristos, L. and Samaras, Z. (2005) Personal communication based on draft COPERT IV. Laboratory of Applied Thermodynamics, Aristotle Unviversity Thessaloniki, P.O. Box 458, GR 54124, Thessaloniki, GREECE	2006 IPCC Guidelines for National Greenhouse Gas Inventories, Volume 2: Energy, Table 3.2.5	IPCC	20	0.0212341	Component	NG
118944	1A3b3 - Heavy Duty Trucks and Buses	1.A.3.b.iii - Heavy-duty trucks and buses	METHANE	Diesel Oil	Diesel Oil	2006 IPCC default	Emission Factor for European Vehicles [COPERT IV Model]	Vehicle Technology/Class: GVW &gt; 16t (For details, consult COPERT iV Model)	Driving Condition: Urban				175	mg/km	Equation 3.2.5 in Volume 2 of the 2006 IPCC Guidelines for National Greenhouse Gas Inventories		Ntziachristos, L. and Samaras, Z. (2005) Personal communication based on draft COPERT IV. Laboratory of Applied Thermodynamics, Aristotle Unviversity Thessaloniki, P.O. Box 458, GR 54124, Thessaloniki, GREECE	2006 IPCC Guidelines for National Greenhouse Gas Inventories, Volume 2: Energy, Table 3.2.5	IPCC	175	0.185798	Component	NG
118945	1A3b3 - Heavy Duty Trucks and Buses	1.A.3.b.iii - Heavy-duty trucks and buses	METHANE	Diesel Oil	Diesel Oil	2006 IPCC default	Emission Factor for European Vehicles [COPERT IV Model]	Vehicle Technology/Class: GVW &gt; 16t (For details, consult COPERT iV Model)	Driving Condition: Rural				80	mg/km	Equation 3.2.5 in Volume 2 of the 2006 IPCC Guidelines for National Greenhouse Gas Inventories		Ntziachristos, L. and Samaras, Z. (2005) Personal communication based on draft COPERT IV. Laboratory of Applied Thermodynamics, Aristotle Unviversity Thessaloniki, P.O. Box 458, GR 54124, Thessaloniki, GREECE	2006 IPCC Guidelines for National Greenhouse Gas Inventories, Volume 2: Energy, Table 3.2.5	IPCC	80	0.0849363	Component	NG
118946	1A3b3 - Heavy Duty Trucks and Buses	1.A.3.b.iii - Heavy-duty trucks and buses	METHANE	Diesel Oil	Diesel Oil	2006 IPCC default	Emission Factor for European Vehicles [COPERT IV Model]	Vehicle Technology/Class: GVW &gt; 16t (For details, consult COPERT iV Model)	Driving Condition: Highway				70	mg/km	Equation 3.2.5 in Volume 2 of the 2006 IPCC Guidelines for National Greenhouse Gas Inventories		Ntziachristos, L. and Samaras, Z. (2005) Personal communication based on draft COPERT IV. Laboratory of Applied Thermodynamics, Aristotle Unviversity Thessaloniki, P.O. Box 458, GR 54124, Thessaloniki, GREECE	2006 IPCC Guidelines for National Greenhouse Gas Inventories, Volume 2: Energy, Table 3.2.5	IPCC	70	0.0743192	Component	NG
118950	1A3b3 - Heavy Duty Trucks and Buses	1.A.3.b.iii - Heavy-duty trucks and buses	METHANE	Diesel Oil	Diesel Oil	2006 IPCC default	Emission Factor for European Vehicles [COPERT IV Model]	Vehicle Technology/Class: Urban Buses & Coaches (For details, consult COPERT iV Model)	Driving Condition: Urban				175	mg/km	Equation 3.2.5 in Volume 2 of the 2006 IPCC Guidelines for National Greenhouse Gas Inventories		Ntziachristos, L. and Samaras, Z. (2005) Personal communication based on draft COPERT IV. Laboratory of Applied Thermodynamics, Aristotle Unviversity Thessaloniki, P.O. Box 458, GR 54124, Thessaloniki, GREECE	2006 IPCC Guidelines for National Greenhouse Gas Inventories, Volume 2: Energy, Table 3.2.5	IPCC	175	0.185798	Component	NG
118951	1A3b3 - Heavy Duty Trucks and Buses	1.A.3.b.iii - Heavy-duty trucks and buses	METHANE	Diesel Oil	Diesel Oil	2006 IPCC default	Emission Factor for European Vehicles [COPERT IV Model]	Vehicle Technology/Class: Urban Buses & Coaches (For details, consult COPERT iV Model)	Driving Condition: Rural				80	mg/km	Equation 3.2.5 in Volume 2 of the 2006 IPCC Guidelines for National Greenhouse Gas Inventories		Ntziachristos, L. and Samaras, Z. (2005) Personal communication based on draft COPERT IV. Laboratory of Applied Thermodynamics, Aristotle Unviversity Thessaloniki, P.O. Box 458, GR 54124, Thessaloniki, GREECE	2006 IPCC Guidelines for National Greenhouse Gas Inventories, Volume 2: Energy, Table 3.2.5	IPCC	80	0.0849363	Component	NG
118952	1A3b3 - Heavy Duty Trucks and Buses	1.A.3.b.iii - Heavy-duty trucks and buses	METHANE	Diesel Oil	Diesel Oil	2006 IPCC default	Emission Factor for European Vehicles [COPERT IV Model]	Vehicle Technology/Class: Urban Buses & Coaches (For details, consult COPERT iV Model)	Driving Condition: Highway				70	mg/km	Equation 3.2.5 in Volume 2 of the 2006 IPCC Guidelines for National Greenhouse Gas Inventories		Ntziachristos, L. and Samaras, Z. (2005) Personal communication based on draft COPERT IV. Laboratory of Applied Thermodynamics, Aristotle Unviversity Thessaloniki, P.O. Box 458, GR 54124, Thessaloniki, GREECE	2006 IPCC Guidelines for National Greenhouse Gas Inventories, Volume 2: Energy, Table 3.2.5	IPCC	70	0.0743192	Component	NG
118953	1A3b3 - Heavy Duty Trucks and Buses	1.A.3.b.iii - Heavy-duty trucks and buses	METHANE	Natural Gas	Natural Gas	2006 IPCC default	Emission Factor for European Vehicles [COPERT IV Model]	Vehicle Technology/Class: pre-Euro 4 (For details, consult COPERT iV Model)	Fuel: Compressed Natural Gas (CNG)				5400	mg/km	Equation 3.2.5 in Volume 2 of the 2006 IPCC Guidelines for National Greenhouse Gas Inventories		Ntziachristos, L and Samaras, Z (2005). Personal Communication Leonidas Ntziachristos and Zissis Samaras based on draft COPERT IV. Laboratory of Applied Thermodynamics, Aristotle University Thessaloniki, PO Box 458, GR 54124, Thessaloniki, GREECE; .LAT (2005). "Emission factors of N2O and NH3 from road vehicles." LAT Report 0507 (in Greek), Laboratory of Applied Thermodynamics, Aristotle Universi…	2006 IPCC Guidelines for National Greenhouse Gas Inventories, Volume 2: Energy, Table 3.2.5	IPCC	5400	5.7332	Component	NG
118954	1A3b3 - Heavy Duty Trucks and Buses	1.A.3.b.iii - Heavy-duty trucks and buses	METHANE	Natural Gas	Natural Gas	2006 IPCC default	Emission Factor for European Vehicles [COPERT IV Model]	Vehicle Technology/Class: Euro 4 and later including EEV (For details, consult COPERT iV Model)	Fuel: Compressed Natural Gas (CNG)				900	mg/km	Equation 3.2.5 in Volume 2 of the 2006 IPCC Guidelines for National Greenhouse Gas Inventories		Ntziachristos, L. and Samaras, Z. (2005) Personal communication based on draft COPERT IV. Laboratory of Applied Thermodynamics, Aristotle Unviversity Thessaloniki, P.O. Box 458, GR 54124, Thessaloniki, GREECE	2006 IPCC Guidelines for National Greenhouse Gas Inventories, Volume 2: Energy, Table 3.2.5	IPCC	900	0.955533	Component	NG
118958	1A3b3 - Heavy Duty Trucks and Buses	1.A.3.b.iii - Heavy-duty trucks and buses	METHANE	Motor Gasoline	Motor Gasoline	2006 IPCC default	Emission Factor for European Vehicles [COPERT IV Model]	Vehicle Type: Power Two Wheeler, Vehicle Technology/Class: &lt;50 cm^3 (For details, consult COPERT iV Model)	Driving Condition: Urban				219	mg/km	Equation 3.2.5 in Volume 2 of the 2006 IPCC Guidelines for National Greenhouse Gas Inventories		Ntziachristos, L. and Samaras, Z. (2005) Personal communication based on draft COPERT IV. Laboratory of Applied Thermodynamics, Aristotle Unviversity Thessaloniki, P.O. Box 458, GR 54124, Thessaloniki, GREECE	2006 IPCC Guidelines for National Greenhouse Gas Inventories, Volume 2: Energy, Table 3.2.5	IPCC	219	0.232513	Component	NG
118959	1A3b3 - Heavy Duty Trucks and Buses	1.A.3.b.iii - Heavy-duty trucks and buses	METHANE	Motor Gasoline	Motor Gasoline	2006 IPCC default	Emission Factor for European Vehicles [COPERT IV Model]	Vehicle Type: Power Two Wheeler, Vehicle Technology/Class: &lt;50 cm^3 (For details, consult COPERT iV Model)	Driving Condition: Rural				219	mg/km	Equation 3.2.5 in Volume 2 of the 2006 IPCC Guidelines for National Greenhouse Gas Inventories		Ntziachristos, L. and Samaras, Z. (2005) Personal communication based on draft COPERT IV. Laboratory of Applied Thermodynamics, Aristotle Unviversity Thessaloniki, P.O. Box 458, GR 54124, Thessaloniki, GREECE	2006 IPCC Guidelines for National Greenhouse Gas Inventories, Volume 2: Energy, Table 3.2.5	IPCC	219	0.232513	Component	NG
118960	1A3b3 - Heavy Duty Trucks and Buses	1.A.3.b.iii - Heavy-duty trucks and buses	METHANE	Motor Gasoline	Motor Gasoline	2006 IPCC default	Emission Factor for European Vehicles [COPERT IV Model]	Vehicle Type: Power Two Wheeler, Vehicle Technology/Class: &lt;50 cm^3 (For details, consult COPERT iV Model)	Driving Condition: Highway				219	mg/km	Equation 3.2.5 in Volume 2 of the 2006 IPCC Guidelines for National Greenhouse Gas Inventories		Ntziachristos, L. and Samaras, Z. (2005) Personal communication based on draft COPERT IV. Laboratory of Applied Thermodynamics, Aristotle Unviversity Thessaloniki, P.O. Box 458, GR 54124, Thessaloniki, GREECE	2006 IPCC Guidelines for National Greenhouse Gas Inventories, Volume 2: Energy, Table 3.2.5	IPCC	219	0.232513	Component	NG
118964	1A3b3 - Heavy Duty Trucks and Buses	1.A.3.b.iii - Heavy-duty trucks and buses	METHANE	Motor Gasoline	Motor Gasoline	2006 IPCC default	Emission Factor for European Vehicles [COPERT IV Model]	Vehicle Type: Power Two Wheeler, Vehicle Technology/Class: &lt;50 cm^3, 2-stroke (For details, consult COPERT iV Model)	Driving Condition: Urban				150	mg/km	Equation 3.2.5 in Volume 2 of the 2006 IPCC Guidelines for National Greenhouse Gas Inventories		Ntziachristos, L. and Samaras, Z. (2005) Personal communication based on draft COPERT IV. Laboratory of Applied Thermodynamics, Aristotle Unviversity Thessaloniki, P.O. Box 458, GR 54124, Thessaloniki, GREECE	2006 IPCC Guidelines for National Greenhouse Gas Inventories, Volume 2: Energy, Table 3.2.5	IPCC	150	0.159255	Component	NG
118965	1A3b3 - Heavy Duty Trucks and Buses	1.A.3.b.iii - Heavy-duty trucks and buses	METHANE	Motor Gasoline	Motor Gasoline	2006 IPCC default	Emission Factor for European Vehicles [COPERT IV Model]	Vehicle Type: Power Two Wheeler, Vehicle Technology/Class: &lt;50 cm^3, 2-stroke (For details, consult COPERT iV Model)	Driving Condition: Rural				150	mg/km	Equation 3.2.5 in Volume 2 of the 2006 IPCC Guidelines for National Greenhouse Gas Inventories		Ntziachristos, L. and Samaras, Z. (2005) Personal communication based on draft COPERT IV. Laboratory of Applied Thermodynamics, Aristotle Unviversity Thessaloniki, P.O. Box 458, GR 54124, Thessaloniki, GREECE	2006 IPCC Guidelines for National Greenhouse Gas Inventories, Volume 2: Energy, Table 3.2.5	IPCC	150	0.159255	Component	NG
118966	1A3b3 - Heavy Duty Trucks and Buses	1.A.3.b.iii - Heavy-duty trucks and buses	METHANE	Motor Gasoline	Motor Gasoline	2006 IPCC default	Emission Factor for European Vehicles [COPERT IV Model]	Vehicle Type: Power Two Wheeler, Vehicle Technology/Class: &lt;50 cm^3, 2-stroke (For details, consult COPERT iV Model)	Driving Condition: Highway				150	mg/km	Equation 3.2.5 in Volume 2 of the 2006 IPCC Guidelines for National Greenhouse Gas Inventories		Ntziachristos, L. and Samaras, Z. (2005) Personal communication based on draft COPERT IV. Laboratory of Applied Thermodynamics, Aristotle Unviversity Thessaloniki, P.O. Box 458, GR 54124, Thessaloniki, GREECE	2006 IPCC Guidelines for National Greenhouse Gas Inventories, Volume 2: Energy, Table 3.2.5	IPCC	150	0.159255	Component	NG
118970	1A3b3 - Heavy Duty Trucks and Buses	1.A.3.b.iii - Heavy-duty trucks and buses	METHANE	Motor Gasoline	Motor Gasoline	2006 IPCC default	Emission Factor for European Vehicles [COPERT IV Model]	Vehicle Type: Power Two Wheeler, Vehicle Technology/Class: &lt;50 cm^3, 4-stroke (For details, consult COPERT iV Model)	Driving Condition: Urban				200	mg/km	Equation 3.2.5 in Volume 2 of the 2006 IPCC Guidelines for National Greenhouse Gas Inventories		Ntziachristos, L. and Samaras, Z. (2005) Personal communication based on draft COPERT IV. Laboratory of Applied Thermodynamics, Aristotle Unviversity Thessaloniki, P.O. Box 458, GR 54124, Thessaloniki, GREECE	2006 IPCC Guidelines for National Greenhouse Gas Inventories, Volume 2: Energy, Table 3.2.5	IPCC	200	0.212341	Component	NG
118971	1A3b3 - Heavy Duty Trucks and Buses	1.A.3.b.iii - Heavy-duty trucks and buses	METHANE	Motor Gasoline	Motor Gasoline	2006 IPCC default	Emission Factor for European Vehicles [COPERT IV Model]	Vehicle Type: Power Two Wheeler, Vehicle Technology/Class: &lt;50 cm^3, 4-stroke (For details, consult COPERT iV Model)	Driving Condition: Rural				200	mg/km	Equation 3.2.5 in Volume 2 of the 2006 IPCC Guidelines for National Greenhouse Gas Inventories		Ntziachristos, L. and Samaras, Z. (2005) Personal communication based on draft COPERT IV. Laboratory of Applied Thermodynamics, Aristotle Unviversity Thessaloniki, P.O. Box 458, GR 54124, Thessaloniki, GREECE	2006 IPCC Guidelines for National Greenhouse Gas Inventories, Volume 2: Energy, Table 3.2.5	IPCC	200	0.212341	Component	NG
118972	1A3b3 - Heavy Duty Trucks and Buses	1.A.3.b.iii - Heavy-duty trucks and buses	METHANE	Motor Gasoline	Motor Gasoline	2006 IPCC default	Emission Factor for European Vehicles [COPERT IV Model]	Vehicle Type: Power Two Wheeler, Vehicle Technology/Class: &lt;50 cm^3, 4-stroke (For details, consult COPERT iV Model)	Driving Condition: Highway				200	mg/km	Equation 3.2.5 in Volume 2 of the 2006 IPCC Guidelines for National Greenhouse Gas Inventories		Ntziachristos, L. and Samaras, Z. (2005) Personal communication based on draft COPERT IV. Laboratory of Applied Thermodynamics, Aristotle Unviversity Thessaloniki, P.O. Box 458, GR 54124, Thessaloniki, GREECE	2006 IPCC Guidelines for National Greenhouse Gas Inventories, Volume 2: Energy, Table 3.2.5	IPCC	200	0.212341	Component	NG
122961	1A3b - Road Transportation	1.A.3.b - Road Transportation	METHANE	Fuel mixtures (fossil and biomass)	Biogasoline	Other (e.g. compiled)	Emission factor		CH4 emissions determined using the federal test procedure (FTP) for seven light-duty vehicles of different brands and 2006 or 2007 models. All cars were provided with catalytic converters. The reference (CRC report E-80) provides detailed information on the selection and stage of the cars.	USA		Fuel used: motor gasoline blend E6, with a nominal 5.7 Volume % of ethanol. Measured ethanol content for the E6 sample considered in the study: 5.08 mass %.	0.016-0.026	g/mile			Exhaust and evaporative emissions testing of flexible-fuels vehicles, CRC Report No. E-80, Coordinating Research Council, Inc., USA, 2011. (Appendix II)	Other	IPCC TFI TSU	0.021	0.0356732	Component	NG
122962	1A3b - Road Transportation	1.A.3.b - Road Transportation	METHANE	Fuel mixtures (fossil and biomass)	Biogasoline	Other (e.g. compiled)	Emission factor		CH4 emissions determined using the federal test procedure (FTP) for seven light-duty vehicles of different brands and 2006 or 2007 models. All cars were provided with catalytic converters. The reference (CRC report E-80) provides detailed information on the selection and stage of the cars.	USA		Fuel used: motor gasoline blend E32, which is a 2:1 vol mixture of biogasolines E6 and E85. E6 has a nominal 5.7 Volume % of ethanol while E85 contains up to 85 volume % of ethanol. Measured ethanol content for the E32 sample considerfed in the study: 29.50 mass %.	0.017-0.033	g/mile			Exhaust and evaporative emissions testing of flexible-fuels vehicles, CRC Report No. E-80, Coordinating Research Council, Inc., USA, 2011. (Appendix II)	Other	IPCC TFI TSU	0.025	0.0424681	Component	NG
122963	1A3b - Road Transportation	1.A.3.b - Road Transportation	METHANE	Fuel mixtures (fossil and biomass)	Biogasoline	Other (e.g. compiled)	Emission factor		CH4 emissions determined using the federal test procedure (FTP) for to seven light-duty vehicles of different brands and 2006 or 2007 models. All cars were provided with catalytic converters. The reference (CRC report E-80) provides detailed information on the selection and stage of the cars.	USA		Motor gasoline blend E59, which is a 1:2 vol mixture of biogasolines E6 and E85. E6 has a nominal 5.7 Volume % of ethanol while E85 contains up to 85 volume % of ethanol. Measured ethanol content for the E32 sample considered in the study: 52.82 mass %.	0.016-0.042	g/mile			Exhaust and evaporative emissions testing of flexible-fuels vehicles, CRC Report No. E-80, Coordinating Research Council, Inc., USA, 2011. (Appendix II)	Other	IPCC TFI TSU, United States of America	0.029	0.049263	Component	NG
122964	1A3b - Road Transportation	1.A.3.b - Road Transportation	METHANE	Fuel mixtures (fossil and biomass)	Biogasoline	Other (e.g. compiled)	Emission factor		CH4 emissions determined using the federal test procedure (FTP) for seven light-duty vehicles of different brands and 2006 or 2007 models. All cars were provided with catalytic converters. The reference (CRC report E-80) provides detailed information on the selection and stage of the cars.	USA		Motor gasoline blend E85, which contains up to 85 volume % of ethanol. Measured ethanol content for the E85 sample considered in the study: 83.31 mass %.	0.015-0.057	g/mile			Exhaust and evaporative emissions testing of flexible-fuels vehicles, CRC Report No. E-80, Coordinating Research Council, Inc., USA, 2011. (Appendix II)	Other	IPCC TFI TSU	0.036	0.0611541	Component	NG
122965	1B2b - Natural Gas	1.B.2.b - Natural Gas	METHANE			Measured	Emission factor for uncontrolled wells during well completion flowback	Hydraulic fracturing	Measurements were performed after well is drilled during competion stage (exploration)	Gulf Coast, Midcontinent, Rocky Mountain, and Appalachian production regions of the United States of America	Uncontroled		0.83	Mg/well completion flowback event			Allen, D. T.; Torres, V. M.; Thomas, J.; Sullivan, D.; Harrison, M.; Hendler, A.; Herndon, S. C.; Kolb, C. E.; Fraser, M. P.; Hill, A. D.; Lamb, B. K.; Miskimins, J.; Sawyer, R. F.; Seinfeld, J. H. Measurements of methane emissions at natural gas production sites in the United States. Proc. Natl. Acad. Sci. U.S.A. 2013, 110, 17768-17773	Peer-reviewed journal	IPCC TFI TSU	0.83	10259.6	Component	NG
122966	1B2b - Natural Gas	1.B.2.b - Natural Gas	METHANE			Measured	Emission factor for gas well unloading	Gas Well Liquids Unloadings (non-plunger)	Measurements were performed during manual unloadings events	Gulf Coast, Rocky Mountain, and Appalachian production regions of the United States of America	Uncontroled		1.1	Mg/unloading event			Allen, D. T.; Torres, V. M.; Thomas, J.; Sullivan, D.; Harrison, M.; Hendler, A.; Herndon, S. C.; Kolb, C. E.; Fraser, M. P.; Hill, A. D.; Lamb, B. K.; Miskimins, J.; Sawyer, R. F.; Seinfeld, J. H. Measurements of methane emissions at natural gas production sites in the United States. Proc. Natl. Acad. Sci. U.S.A. 2013, 110, 17768-17773	Peer-reviewed journal	IPCC TFI TSU	1.1	982143	Component	NG
122967	1B2b - Natural Gas	1.B.2.b - Natural Gas	METHANE			Measured	Emission factor for equipment leaks	Includes leaks from wellhead equipment, piping, flanges, fittings, valves and separators; does not include flashing from tanks or engine exhaust gases		Gulf Coast, Midcontinent, Rocky Mountain, and Appalachian production regions of the United States of America	Uncontroled		33900	scf/well			Allen, D. T.; Torres, V. M.; Thomas, J.; Sullivan, D.; Harrison, M.; Hendler, A.; Herndon, S. C.; Kolb, C. E.; Fraser, M. P.; Hill, A. D.; Lamb, B. K.; Miskimins, J.; Sawyer, R. F.; Seinfeld, J. H. Measurements of methane emissions at natural gas production sites in the United States. Proc. Natl. Acad. Sci. U.S.A. 2013, 110, 17768-17773	Peer-reviewed journal	IPCC TFI TSU	33900	73.9144	Component	NG
122968	1B2b - Natural Gas	1.B.2.b - Natural Gas	METHANE			Measured	Emission factor for well unloading	Gas well liquids unloading (non plunger lifts), number of events per year per well is greater than 10 and less than or equal to 50.	Measurements were performed during manual unloadings events	United States of America	Uncontroled		24100	scf/event				Peer-reviewed journal	IPCC TFI TSU	24100	410991	Component	NG
122969	1B2b - Natural Gas	1.B.2.b - Natural Gas	METHANE			Measured	Emission factor for well unloading	Gas well liquids unloading (with plunger lifts), number of events per year per well is less than or equal to 100	Manually triggered liquid unloadings practice was used	United States of America	Uncontroled		9650	scf/event				Peer-reviewed journal	IPCC TFI TSU	9650	164567	Component	NG
122970	1B2b - Natural Gas	1.B.2.b - Natural Gas	METHANE			Measured	Emission factor for well unloading	Gas well liquids unloading (with plunger lifts), number of events per year per well: events>100	Automatically triggered liquid unloadings practice was used	United States of America	Uncontroled		1260	scf/event				Peer-reviewed journal	IPCC TFI TSU	1260	21487.5	Component	NG
122971	1B2 - Oil and Natural Gas	1.B.2 - Oil and Natural Gas	METHANE			Measured	Emission factor for decommissioned oil and gas wells			United Kingdom	Wells have been decommissioned in line with best practice.		364 +/- 677	kg CO2e/well, GWP=24				Peer-reviewed journal	IPCC TFI TSU	364	1.73135	Component	NG
122972	1B2 - Oil and Natural Gas	1.B.2 - Oil and Natural Gas	METHANE			Measured	Emission factor for abandoned oil and gas wells			United Kingdom	None		8604	kg CO2e/well, GWP=24				Peer-reviewed journal	IPCC TFI TSU	8604	40.9247	Component	NG
123836	1A3b1 - Cars	1.A.3.b.i - Cars	METHANE	Natural Gas	Natural Gas	Other (e.g. compiled)	EF for passenger car using CNG fuel at hot condition on urban road						57.3	mg/km		Not applicable	EMEP/EEA air pollutant emission inventory guidebook 2016 1.A.3.b.i-iv Road transport 2018.pdf p75 Table 3.47	Other	TSU	57.3	0.0608356	Component	NG
123837	1A3b1 - Cars	1.A.3.b.i - Cars	METHANE	Natural Gas	Natural Gas	Other (e.g. compiled)	EF for passenger car using CNG fuel on rural road						27.73	mg/km		Not applicable	EMEP/EEA air pollutant emission inventory guidebook 2016 1.A.3.b.i-iv Road transport 2018.pdf p75 Table 3.47	Other	TSU	27.73	0.029441	Component	NG
123838	1A3b1 - Cars	1.A.3.b.i - Cars	METHANE	Natural Gas	Natural Gas	Other (e.g. compiled)	EF for passenger car using CNG fuel on highway						43.39	mg/km		Not applicable	EMEP/EEA air pollutant emission inventory guidebook 2016 1.A.3.b.i-iv Road transport 2018.pdf p75 Table 3.47	Other	TSU	43.39	0.0460673	Component	NG
124231	1A3b - Road Transportation	1.A.3.b - Road Transportation	METHANE	Diesel Oil	Diesel Oil	Measured	CH4 EF applicable for cold start EURO 6b passenger cars fueled with diesel oil at 23 degrees. Only for vehicles with the SCR technology.			EU, countries using EURO standardisation	Selective catalytic reduction (SCR)		2	mg/km				Peer-reviewed journal	TFI TSU	2	0.00212341	Component	NG
124232	1A3b - Road Transportation	1.A.3.b - Road Transportation	METHANE	Diesel Oil	Diesel Oil	Measured	CH4 EF applicable for cold start EURO 6b passenger cars fueled with diesel oil at -7 degrees. Only for vehicles with the SCR technology.			EU, countries using EURO standardisation	Selective catalytic reduction (SCR)		1	mg/km				Peer-reviewed journal	TFI TSU	1	0.0010617	Component	NG
124233	1A3b - Road Transportation	1.A.3.b - Road Transportation	METHANE	Diesel Oil	Diesel Oil	Measured	CH4 EF applicable for cold start EURO 6b passenger cars fueled with diesel oil at 23 degrees. Only for vehicles with the LNT technology.			EU, countries using EURO standardisation	Lean NOx trap (LNT)		15	mg/km				Peer-reviewed journal	TFI TSU	15	0.0159255	Component	NG
124234	1A3b - Road Transportation	1.A.3.b - Road Transportation	METHANE	Diesel Oil	Diesel Oil	Measured	CH4 EF applicable for cold start EURO 6b passenger cars fueled with diesel oil at -7 degrees. Only for vehicles with the LNT technology.			EU, countries using EURO standardisation	Lean NOx trap (LNT)		12	mg/km				Peer-reviewed journal	TFI TSU	12	0.0127404	Component	NG
124235	1A3b - Road Transportation	1.A.3.b - Road Transportation	METHANE	(Unspecified)	(Unspecified)	Measured	CH4 EF applicable for cold start EURO 6b passenger cars fueled with pure hydrotreated vegetable oil (HVO).			EU, countries using EURO standardisation	Selective catalytic reduction (SCR)		1	mg/km				Peer-reviewed journal	TFI TSU	1	0.0010617	Component	NG
124236	1A3b - Road Transportation	1.A.3.b - Road Transportation	METHANE	(Unspecified)	(Unspecified)	Measured	CH4 EF applicable for cold start EURO 6b passenger cars fueled with pure hydrotreated vegetable oil (HVO) at 23 degrees.			EU, countries using EURO standardisation	Lean NOx trap (LNT)		14	mg/km				Peer-reviewed journal	TFI TSU	14	0.0148638	Component	NG
124237	1A3b - Road Transportation	1.A.3.b - Road Transportation	METHANE	(Unspecified)	(Unspecified)	Measured	CH4 EF applicable for cold start EURO 6b passenger cars fueled with pure hydrotreated vegetable oil (HVO) at -7 degrees.			EU, countries using EURO standardisation	Lean NOx trap (LNT)		16	mg/km				Peer-reviewed journal	TFI TSU	16	0.0169873	Component	NG
124238	1A3b - Road Transportation	1.A.3.b - Road Transportation	METHANE	(Unspecified)	(Unspecified)	Measured	CH4 EF applicable for cold start EURO 6b passenger cars fueled with B7 diesel mixture.			EU, countries using EURO standardisation	Selective catalytic reduction (SCR)		1	mg/km				Peer-reviewed journal	TFI TSU	1	0.0010617	Component	NG
124239	1A3b - Road Transportation	1.A.3.b - Road Transportation	METHANE	(Unspecified)	(Unspecified)	Measured	CH4 EF applicable for cold start EURO 6b passenger cars fueled with B7 diesel mixture at 23 degrees.			EU, countries using EURO standardisation	Lean NOx trap (LNT)		14	mg/km				Peer-reviewed journal	TFI TSU	14	0.0148638	Component	NG
124240	1A3b - Road Transportation	1.A.3.b - Road Transportation	METHANE	(Unspecified)	(Unspecified)	Measured	CH4 EF applicable for cold start EURO 6b passenger cars fueled with B7 diesel mixture at -7 degrees.			EU, countries using EURO standardisation	Lean NOx trap (LNT)		13	mg/km				Peer-reviewed journal	TFI TSU	13	0.0138021	Component	NG
124263	1A3b1 - Cars	1.A.3.b.i - Cars	METHANE	Motor Gasoline	Motor Gasoline	Measured	Methane emissions from gasoline driven Japanese light passenger cars	Japanese light passenger vehicle (660 cc or lower)		Japan			3.6	mg/km			National Greenhuse Gas Inventory Report of Japan, Ministry of the Environment, Government of Japan, 2019 (English); Ministry of the Environment, Committee for the Greenhouse Gases Emissions Estimation Methods, GHGs Estimation Methods Committee Report Part 1, August 2006. (Only in Japanese)	National Inventory Report (Annex I)	TFI TSU	3.6	0.00382213	Component	NG
124265	1A3b1 - Cars	1.A.3.b.i - Cars	METHANE	Motor Gasoline	Motor Gasoline	Measured	Methane emissions from gasoline driven Japanese passenger vehicles	Japanese passenger vehicle (>660 cc)		Japan			5.9	mg/km			National Greenhuse Gas Inventory Report of Japan, Ministry of the Environment, Government of Japan, 2019 (English); Ministry of the Environment, Committee for the Greenhouse Gases Emissions Estimation Methods, GHGs Estimation Methods Committee Report Part 1, August 2006. (Only in Japanese)	National Inventory Report (Annex I)	TFI TSU	5.9	0.00626405	Component	NG
124267	1A3b3 - Heavy Duty Trucks and Buses	1.A.3.b.iii - Heavy-duty trucks and buses	METHANE	Motor Gasoline	Motor Gasoline	Measured	Methane emissions from gasoline driven Japanese light cargo trucks	Japanese light cargo trucks		Japan			4.6	mg/km			National Greenhuse Gas Inventory Report of Japan, Ministry of the Environment, Government of Japan, 2019 (English); Ministry of the Environment, Committee for the Greenhouse Gases Emissions Estimation Methods, GHGs Estimation Methods Committee Report Part 1, August 2006. (Only in Japanese)	National Inventory Report (Annex I)	TFI TSU	4.6	0.00488384	Component	NG
124269	1A3b3 - Heavy Duty Trucks and Buses	1.A.3.b.iii - Heavy-duty trucks and buses	METHANE	Motor Gasoline	Motor Gasoline	Measured	Methane emissions from gasoline driven Japanese small cargo trucks	Japanese small cargo trucks		Japan			6.3	mg/km			National Greenhuse Gas Inventory Report of Japan, Ministry of the Environment, Government of Japan, 2019 (English); Ministry of the Environment, Committee for the Greenhouse Gases Emissions Estimation Methods, GHGs Estimation Methods Committee Report Part 1, August 2006. (Only in Japanese)	National Inventory Report (Annex I)	TFI TSU	6.3	0.00668873	Component	NG
124271	1A3b1 - Cars	1.A.3.b.i - Cars	METHANE	Diesel Oil	Diesel Oil	Measured	Methane emissions from diesel driven Japanese passenger vehicles	Japanese passenger vehicle (>660 cc)		Japan			14.5	mg/km			National Greenhuse Gas Inventory Report of Japan, Ministry of the Environment, Government of Japan, 2019 (English); Ministry of the Environment, Committee for the Greenhouse Gases Emissions Estimation Methods, GHGs Estimation Methods Committee Report Part 1, August 2006. (Only in Japanese)	National Inventory Report (Annex I)	TFI TSU	14.5	0.0153947	Component	NG
124273	1A3b3 - Heavy Duty Trucks and Buses	1.A.3.b.iii - Heavy-duty trucks and buses	METHANE	Diesel Oil	Diesel Oil	Measured	Methane emissions from diesel driven Japanese small cargo trucks	Japanese small cargo trucks		Japan			8.2	mg/km			National Greenhuse Gas Inventory Report of Japan, Ministry of the Environment, Government of Japan, 2019 (English); Ministry of the Environment, Committee for the Greenhouse Gases Emissions Estimation Methods, GHGs Estimation Methods Committee Report Part 1, August 2006. (Only in Japanese)	National Inventory Report (Annex I)	TFI TSU	8.2	0.00870597	Component	NG
124275	1A3b3 - Heavy Duty Trucks and Buses	1.A.3.b.iii - Heavy-duty trucks and buses	METHANE	Diesel Oil	Diesel Oil	Measured	Methane emissions from diesel driven Japanese regular cargo trucks	Japanese regular cargo trucks		Japan			7.9	mg/km			National Greenhuse Gas Inventory Report of Japan, Ministry of the Environment, Government of Japan, 2019 (English); Ministry of the Environment, Committee for the Greenhouse Gases Emissions Estimation Methods, GHGs Estimation Methods Committee Report Part 1, August 2006. (Only in Japanese)	National Inventory Report (Annex I)	TFI TSU	7.9	0.00838746	Component	NG
124277	1A3b1 - Cars	1.A.3.b.i - Cars	METHANE	Natural Gas	Natural Gas	Measured	Methane emissions from natural gas driven Japanese passenger vehicles	Japanese passenger vehicle (>660 cc)		Japan			13	mg/km			National Greenhuse Gas Inventory Report of Japan, Ministry of the Environment, Government of Japan, 2019 (English); Ministry of the Environment, Committee for the Greenhouse Gases Emissions Estimation Methods, GHGs Estimation Methods Committee Report Part 1, August 2006. (Only in Japanese)	National Inventory Report (Annex I)	TFI TSU	13	0.0138021	Component	NG
124279	1A3b3 - Heavy Duty Trucks and Buses	1.A.3.b.iii - Heavy-duty trucks and buses	METHANE	Natural Gas	Natural Gas	Measured	Methane emissions from natural gas driven Japanese buses	Japanese Bus		Japan			50	mg/km			National Greenhuse Gas Inventory Report of Japan, Ministry of the Environment, Government of Japan, 2019 (English); Ministry of the Environment, Committee for the Greenhouse Gases Emissions Estimation Methods, GHGs Estimation Methods Committee Report Part 1, August 2006. (Only in Japanese)	National Inventory Report (Annex I)	TFI TSU	50	0.0530852	Component	NG
124281	1A3b3 - Heavy Duty Trucks and Buses	1.A.3.b.iii - Heavy-duty trucks and buses	METHANE	Natural Gas	Natural Gas	Measured	Methane emissions from natural gas driven Japanese regular cargo trucks	Japanese regular cargo trucks		Japan			93	mg/km			National Greenhuse Gas Inventory Report of Japan, Ministry of the Environment, Government of Japan, 2019 (English); Ministry of the Environment, Committee for the Greenhouse Gases Emissions Estimation Methods, GHGs Estimation Methods Committee Report Part 1, August 2006. (Only in Japanese)	National Inventory Report (Annex I)	TFI TSU	93	0.0987384	Component	NG
124735	1B2a6 - Other (please specify)	1.B.2.a.ii - Flaring	METHANE			2006 IPCC default	Methane emission factor for fugitive emissions from oil and gas operations - Well drilling (flaring and venting)	Well Drilling	Flaring and venting	Developing country and country with economy in transition			0.000033-0.00056	Gg per well drilled	Equation 4.2.1 in Volume 2 of the 2006 IPCC Guidelines for National Greenhouse Gas Inventories	Worksheet 1B.2 (sheet 1 of 2)	The factors presented in this table have been determined by setting the lower limit of the range for each category equal to at least the values published in Table 4.2.4 for North America. Otherwise, all presented values have been adapted from applicable data provided in the 1996 IPCC Guidelines and from limited measurement data available from more recent unpublished studies of natural gas systems…	2006 IPCC Guidelines for National Greenhouse Gas Inventories, Volume 2, Chapter 4, Table 4.2.5	IPCC TFI TSU	0.0002965	48.6385	Component	NG
124738	1B2a6 - Other (please specify)	1.B.2.a.ii - Flaring	METHANE			2006 IPCC default	Methane emission factor for fugitive emissions from oil and gas operations - Well testing (flaring and venting)	Well Testing	Flaring and venting	Developing country and country with economy in transition			0.000051-0.00085	Gg per well drilled	Equation 4.2.1 in Volume 2 of the 2006 IPCC Guidelines for National Greenhouse Gas Inventories	Worksheet 1B.2 (sheet 1 of 2)	The factors presented in this table have been determined by setting the lower limit of the range for each category equal to at least the values published in Table 4.2.4 for North America. Otherwise, all presented values have been adapted from applicable data provided in the 1996 IPCC Guidelines and from limited measurement data available from more recent unpublished studies of natural gas systems…	2006 IPCC Guidelines for National Greenhouse Gas Inventories, Volume 2, Chapter 4, Table 4.2.5	IPCC TFI TSU	0.0004505	73.9009	Component	NG
124742	1B2a6 - Other (please specify)	1.B.2.a.ii - Flaring	METHANE			2006 IPCC default	Methane emission factor for fugitive emissions from oil and gas operations - Well servicing (flaring and venting)	Well Servicing	Flaring and venting	Developing country and country with economy in transition			0.00011-0.0018	Gg/yr per producing or capable well	Equation 4.2.1 in Volume 2 of the 2006 IPCC Guidelines for National Greenhouse Gas Inventories	Worksheet 1B.2 (sheet 1 of 2)	The factors presented in this table have been determined by setting the lower limit of the range for each category equal to at least the values published in Table 4.2.4 for North America. Otherwise, all presented values have been adapted from applicable data provided in the 1996 IPCC Guidelines and from limited measurement data available from more recent unpublished studies of natural gas systems…	2006 IPCC Guidelines for National Greenhouse Gas Inventories, Volume 2, Chapter 4, Table 4.2.5	IPCC TFI TSU	0.000955	156.66	Component	NG
124936	1B2 - Oil and Natural Gas	1.B.2.a - Oil	METHANE			Measured	Methane emission factor from plugged and abandoned oil and natural gas wells			West Virginia, Eastern United States, Appalachian Basin	Abandoned wells that have been plugged. Those that have protective casing inside the wellbore cemented to the surface have to be vented in this state		0.00312	kg CH4 /d			Riddick, S. N. Et al. (2019) Measuring methane emissions from abandoned and active oil and gas wells in West Virginia, Science of the Total Environment, 651, 1849-1956, https://doi.org/10.1016/j.scitotenv.2018.10.082	Peer-reviewed journal	IPCC TFI TSU	0.00312	0.13	Component	NG
124937	1B2 - Oil and Natural Gas	1.B.2.a - Oil	METHANE			Measured	Methane emission factor from unplugged and abandoned oil and natural gas wells			West Virginia, Eastern United States, Appalachian Basin	Abandoned wells not plugged according to regulation		0.0744	kg CH4 /d			Riddick, S. N. Et al. (2019) Measuring methane emissions from abandoned and active oil and gas wells in West Virginia, Science of the Total Environment, 651, 1849-1956, https://doi.org/10.1016/j.scitotenv.2018.10.082	Peer-reviewed journal	IPCC TFI TSU	0.0744	3.1	Component	NG
124938	1B2 - Oil and Natural Gas	1.B.2 - Oil and Natural Gas	METHANE			Measured	Methane emission factor from active oil and natural gas wells			West Virginia, Eastern United States, Appalachian Basin	Active conventional wells in West Virginia, USA. Does not specify if venting or flaring, assume both		3.336	kg CH4 /d			Riddick, S. N. Et al. (2019) Measuring methane emissions from abandoned and active oil and gas wells in West Virginia, Science of the Total Environment, 651, 1849-1956, https://doi.org/10.1016/j.scitotenv.2018.10.082	Peer-reviewed journal	IPCC TFI TSU	3.336	139	Component	NG
125553	1B2 - Oil and Natural Gas	1.B.2 - Oil and Natural Gas	METHANE			Measured	Methane emission factor for abandoned unplugged oil wells in the United States and Canada			Oklahoma, West Viriginia, Ohio, Wyoming, Colorado, Pennsylvania, and Utah in the United States. British Columbia and New Brunswick in Canada.	Abandoned wells not plugged according to current regulations or not plugged at all.		105	kg CH4 per well / year	4.2.1	1.B.2	Williams, James P., Amara Regehr, and Mary Kang. "Methane Emissions from Abandoned Oil and Gas Wells in Canada and the United States." Environmental Science & Technology (2020).	Peer-reviewed journal	James P. Williams and Mary Kang, Canada	105	11.9863	Component	NG
125554	1B2 - Oil and Natural Gas	1.B.2 - Oil and Natural Gas	METHANE			Measured	Methane emission factor for abandoned unplugged gas wells in the United States and Canada			Oklahoma, West Viriginia, Ohio, Wyoming, Colorado, Pennsylvania, and Utah in the United States. British Columbia and New Brunswick in Canada.	Abandoned wells not plugged according to current regulations or not plugged at all.		193	kg CH4 per well / year	4.2.1	1.B.2	Williams, James P., Amara Regehr, and Mary Kang. "Methane Emissions from Abandoned Oil and Gas Wells in Canada and the United States." Environmental Science & Technology (2020).	Peer-reviewed journal	James P. Williams and Mary Kang, Canada	193	22.032	Component	NG
125555	1B2 - Oil and Natural Gas	1.B.2 - Oil and Natural Gas	METHANE			Measured	Methane emission factor for abandoned unplugged gas wells in the United States and Canada			Oklahoma, West Viriginia, Ohio, Wyoming, Colorado, Pennsylvania, and Utah in the United States. British Columbia and New Brunswick in Canada.	Abandoned wells not plugged according to current regulations or not plugged at all.		87.6	kg CH4 per well / year	4.2.1	1.B.2	Williams, James P., Amara Regehr, and Mary Kang. "Methane Emissions from Abandoned Oil and Gas Wells in Canada and the United States." Environmental Science & Technology (2020).	Peer-reviewed journal	James P. Williams and Mary Kang, Canada	87.6	10	Component	NG
125556	1B2 - Oil and Natural Gas	1.B.2 - Oil and Natural Gas	METHANE			Measured	Methane emission factor for abandoned unplugged gas wells in the United States and Canada			Oklahoma, West Viriginia, Ohio, Wyoming, Colorado, Pennsylvania, and Utah in the United States. British Columbia and New Brunswick in Canada.	Abandoned wells plugged according to current regulations.		0.403	kg CH4 per well / year	4.2.1	1.B.2	Williams, James P., Amara Regehr, and Mary Kang. "Methane Emissions from Abandoned Oil and Gas Wells in Canada and the United States." Environmental Science & Technology (2020).	Peer-reviewed journal	James P. Williams and Mary Kang, Canada	0.403	0.0460046	Component	NG
125557	1B2 - Oil and Natural Gas	1.B.2 - Oil and Natural Gas	METHANE			Measured	Methane emission factor for abandoned unplugged gas wells in the United States and Canada			Oklahoma, West Viriginia, Ohio, Wyoming, Colorado, Pennsylvania, and Utah in the United States. British Columbia and New Brunswick in Canada.	Abandoned wells plugged according to current regulations.		42.0	kg CH4 per well / year	4.2.1	1.B.2	Williams, James P., Amara Regehr, and Mary Kang. "Methane Emissions from Abandoned Oil and Gas Wells in Canada and the United States." Environmental Science & Technology (2020).	Peer-reviewed journal	James P. Williams and Mary Kang, Canada	42	4.79452	Component	NG
125558	1B2 - Oil and Natural Gas	1.B.2 - Oil and Natural Gas	METHANE			Measured	Methane emission factor for abandoned unplugged gas wells in the United States and Canada			Oklahoma, West Viriginia, Ohio, Wyoming, Colorado, Pennsylvania, and Utah in the United States. British Columbia and New Brunswick in Canada.	Abandoned wells plugged according to current regulations.		13.1	kg CH4 per well / year	4.2.1	1.B.2	Williams, James P., Amara Regehr, and Mary Kang. "Methane Emissions from Abandoned Oil and Gas Wells in Canada and the United States." Environmental Science & Technology (2020).	Peer-reviewed journal	James P. Williams and Mary Kang, Canada	13.1	1.49543	Component	NG
125559	1B2 - Oil and Natural Gas	1.B.2 - Oil and Natural Gas	METHANE			Measured	Methane emission factor for abandoned unplugged gas wells in the United States and Canada			Oklahoma, West Viriginia, Ohio, Wyoming, Colorado, Pennsylvania, and Utah in the United States.	Abandoned wells not plugged according to current regulations or not plugged at all.		114	kg CH4 per well / year	4.2.1	1.B.2	Williams, James P., Amara Regehr, and Mary Kang. "Methane Emissions from Abandoned Oil and Gas Wells in Canada and the United States." Environmental Science & Technology (2020).	Peer-reviewed journal	James P. Williams and Mary Kang, Canada	114	13.0137	Component	NG
125560	1B2 - Oil and Natural Gas	1.B.2 - Oil and Natural Gas	METHANE			Measured	Methane emission factor for abandoned unplugged gas wells in the United States and Canada			Oklahoma, West Viriginia, Ohio, Wyoming, Colorado, Pennsylvania, and Utah in the United States.	Abandoned wells not plugged according to current regulations or not plugged at all.		202	kg CH4 per well / year	4.2.1	1.B.2	Williams, James P., Amara Regehr, and Mary Kang. "Methane Emissions from Abandoned Oil and Gas Wells in Canada and the United States." Environmental Science & Technology (2020).	Peer-reviewed journal	James P. Williams and Mary Kang, Canada	202	23.0594	Component	NG
125561	1B2 - Oil and Natural Gas	1.B.2 - Oil and Natural Gas	METHANE			Measured	Methane emission factor for abandoned unplugged gas wells in the United States and Canada			Oklahoma, West Viriginia, Ohio, Wyoming, Colorado, Pennsylvania, and Utah in the United States.	Abandoned wells not plugged according to current regulations or not plugged at all.		96.4	kg CH4 per well / year	4.2.1	1.B.2	Williams, James P., Amara Regehr, and Mary Kang. "Methane Emissions from Abandoned Oil and Gas Wells in Canada and the United States." Environmental Science & Technology (2020).	Peer-reviewed journal	James P. Williams and Mary Kang, Canada	96.4	11.0046	Component	NG
125562	1B2 - Oil and Natural Gas	1.B.2 - Oil and Natural Gas	METHANE			Measured	Methane emission factor for abandoned unplugged gas wells in the United States and Canada			Oklahoma, West Viriginia, Ohio, Wyoming, Colorado, Pennsylvania, and Utah in the United States.	Abandoned wells plugged according to current regulations.		0.447	kg CH4 per well / year	4.2.1	1.B.2	Williams, James P., Amara Regehr, and Mary Kang. "Methane Emissions from Abandoned Oil and Gas Wells in Canada and the United States." Environmental Science & Technology (2020).	Peer-reviewed journal	James P. Williams and Mary Kang, Canada	0.447	0.0510274	Component	NG
125563	1B2 - Oil and Natural Gas	1.B.2 - Oil and Natural Gas	METHANE			Measured	Methane emission factor for abandoned unplugged gas wells in the United States and Canada			Oklahoma, West Viriginia, Ohio, Wyoming, Colorado, Pennsylvania, and Utah in the United States.	Abandoned wells plugged according to current regulations.		42.0	kg CH4 per well / year	4.2.1	1.B.2	Williams, James P., Amara Regehr, and Mary Kang. "Methane Emissions from Abandoned Oil and Gas Wells in Canada and the United States." Environmental Science & Technology (2020).	Peer-reviewed journal	James P. Williams and Mary Kang, Canada	42	4.79452	Component	NG
125564	1B2 - Oil and Natural Gas	1.B.2 - Oil and Natural Gas	METHANE			Measured	Methane emission factor for abandoned unplugged gas wells in the United States and Canada			Oklahoma, West Viriginia, Ohio, Wyoming, Colorado, Pennsylvania, and Utah in the United States.	Abandoned wells plugged according to current regulations.		14.0	kg CH4 per well / year	4.2.1	1.B.2	Williams, James P., Amara Regehr, and Mary Kang. "Methane Emissions from Abandoned Oil and Gas Wells in Canada and the United States." Environmental Science & Technology (2020).	Peer-reviewed journal	James P. Williams and Mary Kang, Canada	14	1.59817	Component	NG
125571	1B2a6 - Other (please specify)	1.B.2.a.iii.6 - Other	METHANE			Measured	Emissions from abandoned PLUGGED oil and gas wells in California			California (United States)			0.286	g CH4/hour	Equation 4.2.1 of the 2019 Refinement	Category 1.B.2.A.VII of the 2019 Refinement		Peer-reviewed journal	Eric Lebel, United States of America	0.286	0.286	Component	NG
125572	1B2a6 - Other (please specify)	1.B.2.a.iii.6 - Other	METHANE			Measured	Emissions from abandoned IDLE and ORPHANED oil and gas wells in California			California (United States)			35.4	g CH4/hour	Equation 4.2.1 of the 2019 Refinement	Category 1.B.2.A.VII of the 2019 Refinement			Eric Lebel, United States of America	35.4	35.4	Component	NG
