# Supplementary material for: Controlled release testing of the static chamber methodology for direct measurements of methane emissions
Source: Copernicus journal article supplement (doi:10.5194/amt-2023-27), 2023-03-13
Supplement: Supplementary file 4 [file 20230209_IPCC_EmissionFactors_Waste_AMT.xlsx]

## Sheet: Methane_Flowrates_Waste
EF ID	IPCC 1996 Source/Sink Category	IPCC 2006 Source/Sink Category	Gas	Type of parameter	Description	Technologies / Practices	Parameters / Conditions	Region / Regional Conditions	Abatement / Control Technologies	Other properties	Value	Unit	Equation	IPCC Worksheet	Technical Reference	Source of data	Data provider	Value_2	EF_g_hour	Scale	Source
615011	6D - Other (please specify)	4.B - Biological Treatment of Solid Waste	METHANE	2006 IPCC default	Emission factor	Composting	dry weight basis				10	g CH4/kg waste treated	Equation 4.1 in Chapter 4 of Volume 5 of 2006 Guidelines	Category 4B		2006 IPCC Guidelines	IPCC	10	0.19	Component	Waste		0.019	kg of waste per capita per hour
615012	6D - Other (please specify)	4.B - Biological Treatment of Solid Waste	METHANE	2006 IPCC default	Emission factor	Anaerobic digestion at biogas facilities	dry weight basis				2	g CH4/kg waste treated	Equation 4.1 in Chapter 4 of Volume 5 of 2006 Guidelines	Category 4B		2006 IPCC Guidelines	IPCC	2	0.038	Component	Waste		24	CO2 GWP
615013	6D - Other (please specify)	4.B - Biological Treatment of Solid Waste	METHANE	2006 IPCC default	Emission factor	Composting	wet weight basis				4	g CH4/kg waste treated	Equation 4.1 in Chapter 4 of Volume 5 of 2006 Guidelines	Category 4B		2006 IPCC Guidelines	IPCC	4	0.076	Component	Waste		5.12	L of wastewater per capita per hour
615014	6D - Other (please specify)	4.B - Biological Treatment of Solid Waste	METHANE	2006 IPCC default	Emission factor	Anaerobic digestion at biogas facilities	wet weight basis				0.8	g CH4/kg waste treated	Equation 4.1 in Chapter 4 of Volume 5 of 2006 Guidelines	Category 4B		2006 IPCC Guidelines	IPCC	0.8	0.0152	Component	Waste		0.748815	% Carbon in methane
615031	6C - Waste Incineration	4.C.1 - Waste Incineration	METHANE	Other (e.g. compiled)	CH4 emission factor	Incineration of MSW	Continuous incineration - stoker	Japan			0.2	kg/Gg waste wet weight	Equation 5.4 of Chapter 5, Volume 5 of 2006 Guidelines	4C1 Waste Incineration	GIO (2004). National Greenhouse Gas Inventory Report of JAPAN. Ministry of the Environment/ Japan Greenhouse Gas Inventory Office of Japan (GIO) / Center for Global Environmental Research (CGER) / National Institute for Environmental Studies (NIES). October 2004.	Table 5.3 p.5.20, Chapter 5 in Volume 5 of the 2006 IPCC Guidelines	IPCC	0.2	3.8e-06	Component	Waste
615032	6C - Waste Incineration	4.C.1 - Waste Incineration	METHANE	Other (e.g. compiled)	CH4 emission factor	Incineration of MSW	Continuous incineration - fluidised bed	Japan			0	kg/Gg waste wet weight	Equation 5.4 of Chapter 5, Volume 5 of 2006 Guidelines	4C1 Waste Incineration	GIO (2004). National Greenhouse Gas Inventory Report of JAPAN. Ministry of the Environment/ Japan Greenhouse Gas Inventory Office of Japan (GIO) / Center for Global Environmental Research (CGER) / National Institute for Environmental Studies (NIES). October 2004.	Table 5.3 p.5.20, Chapter 5 in Volume 5 of the 2006 IPCC Guidelines	IPCC	0	0	Component	Waste
615033	6C - Waste Incineration	4.C.1 - Waste Incineration	METHANE	Other (e.g. compiled)	CH4 emission factor	Incineration of MSW	Semi-continuous incineration - stoker	Japan			6	kg/Gg waste wet weight	Equation 5.4 of Chapter 5, Volume 5 of 2006 Guidelines	4C1 Waste Incineration	GIO (2004). National Greenhouse Gas Inventory Report of JAPAN. Ministry of the Environment/ Japan Greenhouse Gas Inventory Office of Japan (GIO) / Center for Global Environmental Research (CGER) / National Institute for Environmental Studies (NIES). October 2004.	Table 5.3 p.5.20, Chapter 5 in Volume 5 of the 2006 IPCC Guidelines	IPCC	6	0.000114	Component	Waste
615034	6C - Waste Incineration	4.C.1 - Waste Incineration	METHANE	Other (e.g. compiled)	CH4 emission factor	Incineration of MSW	Semi-continuous incineration - fluidised bed	Japan			188	kg/Gg waste wet weight	Equation 5.4 of Chapter 5, Volume 5 of 2006 Guidelines	4C1 Waste Incineration	GIO (2004). National Greenhouse Gas Inventory Report of JAPAN. Ministry of the Environment/ Japan Greenhouse Gas Inventory Office of Japan (GIO) / Center for Global Environmental Research (CGER) / National Institute for Environmental Studies (NIES). October 2004.	Table 5.3 p.5.20, Chapter 5 in Volume 5 of the 2006 IPCC Guidelines	IPCC	188	0.003572	Component	Waste
615035	6C - Waste Incineration	4.C.1 - Waste Incineration	METHANE	Other (e.g. compiled)	CH4 emission factor	Incineration of MSW	Batch type incineration - stoker	Japan			60	kg/Gg waste wet weight	Equation 5.4 of Chapter 5, Volume 5 of 2006 Guidelines	4C1 Waste Incineration	GIO (2004). National Greenhouse Gas Inventory Report of JAPAN. Ministry of the Environment/ Japan Greenhouse Gas Inventory Office of Japan (GIO) / Center for Global Environmental Research (CGER) / National Institute for Environmental Studies (NIES). October 2004.	Table 5.3 p.5.20, Chapter 5 in Volume 5 of the 2006 IPCC Guidelines	IPCC	60	0.00114	Component	Waste
615036	6C - Waste Incineration	4.C.1 - Waste Incineration	METHANE	Other (e.g. compiled)	CH4 emission factor	Incineration of MSW	Batch type incineration - fluidised bed	Japan			237	kg/Gg waste wet weight	Equation 5.4 of Chapter 5, Volume 5 of 2006 Guidelines	4C1 Waste Incineration	GIO (2004). National Greenhouse Gas Inventory Report of JAPAN. Ministry of the Environment/ Japan Greenhouse Gas Inventory Office of Japan (GIO) / Center for Global Environmental Research (CGER) / National Institute for Environmental Studies (NIES). October 2004.	Table 5.3 p.5.20, Chapter 5 in Volume 5 of the 2006 IPCC Guidelines	IPCC	237	0.004503	Component	Waste
615037	6C - Waste Incineration	4.C.2 - Open Burning of Waste	METHANE	2006 IPCC default	CH4 emission factor	Open burning of MSW	Open burning of waste				6500	g/ton MSW wet weight	Equation 5.4 of Chapter 5, Volume 5 of 2006 Guidelines	4C2 Open Burning of Waste	USEPA (2001). US-EPA Emission Inventory Improvement Program. Volume III Chapter 16 Open Burning. United States Environmental Protection Agency (USEPA). http://www.epa.gov/ttn/chief/eiip/techreport/volume03/iii16_apr2001.pdf	p.5.20, Chapter 5 in Volume 5 of the 2006 IPCC Guidelines	IPCC	6500	0.1235	Component	Waste
621528	6D - Other (please specify)	4.B - Biological Treatment of Solid Waste	METHANE	Measured	Emission factor for CH4 emissions from windrow composting of garden waste	Outdoor full-scale windrow composting facility	On all measuring days the weather was clear skies (no rain) and average temperatures were 8 to 11 digrees centigrade (in October 2007) and 4 to 8 digrees centigrade (April 2008). The wind speed was 2 to 5 m/s in both campaigns coming from the NW (340 degrees) to WSW (252 degrees), which means that all measurements were performed east (downwind) of the composting plant. The barometric pressure was…	Denmark, Europe			2.4	kg CH4-C / t wet waste	Equation 4.1, Volume 5, 2006 IPCC Guidelines	Worksheet 4.B of 2006 IPCC Guidelines	Andersen, J. K., Boldrin, A., Samuelsson, J., Christensen, T. H., and Scheutz, C. Quantification of greenhouse gas emissions from windrow composting of garden waste, J Environ Qual. 2010, 39 (2), 713-724	Peer-reviewed journal	TFI TSU	2.4	0.0456	Component	Waste
621676	6D - Other (please specify)	4.B - Biological Treatment of Solid Waste	METHANE	Modeled	Direct CH4 emissions from open composting technology	In open technologies, composting is performed in outdoor facilities and the gaseous emissions are in general neither collected nor treated. Direct emissions (operation), directly linked to activities at the composting site and the degradation of the waste. The main GHGs that contribute to global warming are CH4 and N2O. The release of these gases depends on the technology, the waste input and abo…		Netherlands and Denmark			0.8 - 169	kg CO2-eq./tonne wet waste				Peer-reviewed journal	TFI TSU	84.9	0.0672125	Component	Waste
621678	6D - Other (please specify)	4.B - Biological Treatment of Solid Waste	METHANE	Modeled	Direct CH4 emissions from enclosed composting technology	In enclosed systems, the composting process takes place in an enclosed building and the exhaust gases are in several cases treated in biofilters. Reactor technologies (also called in-vessel systems) are a variant of enclosed technologies. Due to a smaller head space above the compost, the volume of exhaust gases that needs to be treated in a reactor is smaller. There is better control of the exha…		Netherlands and Denmark			5 - 46	kg CO2-eq./tonne wet waste				Peer-reviewed journal	TFI TSU	25.5	0.0201875	Component	Waste
621680	6D - Other (please specify)	4.B - Biological Treatment of Solid Waste	METHANE	Modeled	Direct CH4 emissions from home composting	In home composting the handling of waste is undertaken at a private level. Because the composting is performed with minimal equipment and very different levels of control, an average home composting process can hardly be defined. One main advantage of home composting is that no external energy is required for transport or processing. Direct emissions (operation), directly linked to activities at …		Netherlands and Denmark			20 - 55	kg CO2-eq./tonne wet waste				Peer-reviewed journal	TFI TSU	37.5	0.0296875	Component	Waste
621700	6B - Wastewater Handling	4.D - Wastewater Treatment and Discharge	METHANE	Measured	CH4 emission factor		The WWTP under study is located at Kralingseveer,near Rotterdam,the Netherlands,and has a capacity of 360000 population equivalents (PE). The plant is equipped with a centralized anaerobic sludge digestion facility that processes sludge from different WWTPs.	Netherlands			255	kg CH4 /d			Daelman, M.R.J., Van Dongen, L..G.J.M., Van Voorthuizen, E.M., Kleerebezem, R., Van Loosdrecht, M.C.M., and Volcke, E.I.P. Quantification of greenhouse gas emissions from municipal wastewater treatment plants: a case study, Comm. Appl. Biol. Sci, Ghent University, 2011, 76/1, 155-158	Peer-reviewed journal	TFI TSU	255	10625	Site	Waste
621709	6B2 - Domestic and Commercial Wastewater	4.D.1 - Domestic Wastewaster Treatment and Discharge	METHANE	Measured	CH4 emisison rate	Septic tank		United States of America			11	g CH4 /capita /day			Diaz-Valbuena, L. R., Leverenz, H. L., Cappa, C. D., Tchobanoglous, G., Horwath, W. R., and Darby, J. L. Methane, carbon dioxide, and nitrous oxide emissions from septic tank systems, Environ Sci Technol, 2011, 45(7): 2741-2747.	Peer-reviewed journal	TFI TSU	11	0.458333	Component	Waste
621723	6B2 - Domestic and Commercial Wastewater	4.D.1 - Domestic Wastewaster Treatment and Discharge	METHANE	Measured	CH4 emission factor		Measurements were done for a large scale WWTP of capacity 300,000 m3/d during spring and summer of 2010.	China	Wastewater treatment plants applying Biological Nutrient Removal (BNR) technoligies where anaerobic/anoxic/oxic processes are utilized.		1.55	g CH4/litre			Wang, J., Zhang, J., Xie, H., Qi, P., Ren, Y., Hu, Z. Methane emissions from a full-scale A/A/O wastewater treatment plant, Bioresource Technology 2011, 102: 479-5485.	Peer-reviewed journal	TFI TSU	1.55	7.936	Component	Waste
621724	6B2 - Domestic and Commercial Wastewater	4.D.1 - Domestic Wastewaster Treatment and Discharge	METHANE	Measured	CH4 emission factor		Measurements were done for a large scale WWTP of capacity 300,000 m3/d during spring and summer of 2010.		Wastewater treatment plants applying Biological Nutrient Removal (BNR) technoligies where anaerobic/anoxic/oxic processes are utilized.		11.3	g CH4/capita/year			Wang, J., Zhang, J., Xie, H., Qi, P., Ren, Y., Hu, Z. Methane emissions from a full-scale A/A/O wastewater treatment plant, Bioresource Technology 2011, 102: 479-5485.	Peer-reviewed journal	TFI TSU	11.3	0.00128995	Component	Waste
621893	6C - Waste Incineration	4.C.1 - Waste Incineration	METHANE	Measured	CH4 emission factor	3 facilities in Switzerland were studied; all are continuously operated underfeed stoker-type incinerators	Fuel: Solid recovered fuels without addition of sewage sludge	Switzerland	Selective catalytic reduction (SCR) for NOx removal	The facilities burn between 92,000 and 233,000 tonnes of waste per year	2.1	g CH4/tonne waste		Worksheet 4C1: Sheet I of I Estimation of CH4 emissions from Incineration of Waste		Peer-reviewed journal	Eliza Harris, Switzerland	2.1	0.0399	Component	Waste
621894	6C - Waste Incineration	4.C.1 - Waste Incineration	METHANE	Measured	CH4 emission factor	2 facilities in Switzerland were studied; both are continuously operated underfeed stoker-type incinerators	Fuel: Solid recovered fuels without addition of sewage sludge	Switzerland	Selective non-catalytic reduction (SNCR) for NOx removal	The facilities burn between 92,000 and 233,000 tonnes of waste per year	2.5	g CH4/tonne waste		Worksheet 4C1: Sheet I of I Estimation of CH4 emissions from Incineration of Waste		Peer-reviewed journal	Eliza Harris, Switzerland	2.5	0.0475	Component	Waste
622342	6A2 - Unmanaged Waste Disposal Sites	4.A.2 - Unmanaged Waste Disposal Sites	METHANE	Modeled	Methane emission from landfill	Ghazipur landfill	L0 = 54.4 m3/Mg	Delhi, India			10.4	Gg/yr				Peer-reviewed journal	TFI TSU	10.4	1.18721e+06	Site	Waste
622343	6A2 - Unmanaged Waste Disposal Sites	4.A.2 - Unmanaged Waste Disposal Sites	METHANE	Modeled	Methane emission from landfill	Ghazipur landfill	L0 = 70.2 m3/Mg	Delhi, India			13.3	Gg/yr				Peer-reviewed journal	TFI TSU	13.3	1.51826e+06	Site	Waste
622344	6A2 - Unmanaged Waste Disposal Sites	4.A.2 - Unmanaged Waste Disposal Sites	METHANE	Modeled	Methane emission from landfill	Ghazipur landfill	L0 = 64.3 m3/Mg	Delhi, India			12.3	Gg/yr				Peer-reviewed journal	TFI TSU	12.3	1.40411e+06	Site	Waste
622346	6A1 - Managed Waste Disposal on Land	4.A.1 - Managed Waste Disposal Sites	METHANE	Measured	Average methane emission per year		Fifteen Danish landfills were chosen to represent all 134 registered sites in Denmark. The landfills were geographically distributed throughout the country.	Denmark			154	ton/yr				Peer-reviewed journal	TFI TSU	154	17579.9	Site	Waste
622347	6A1 - Managed Waste Disposal on Land	4.A.1 - Managed Waste Disposal Sites	METHANE	Other (e.g. compiled)	Methane emission factor from shredder waste		Fifteen Danish landfills were chosen to represent all 134 registered sites in Denmark. The landfills were geographically distributed throughout the country.	Denmark			0.02	g CH4/h/ton				Peer-reviewed journal	TFI TSU	0.02	0.02	Component	Waste
622349	6B - Wastewater Handling	4.D.1 - Domestic Wastewaster Treatment and Discharge	METHANE	Other (e.g. compiled)	CH4 emission factor	Facility employing anaerobic sludge digestion		Japan			119	mg/m3 influent				Peer-reviewed journal	TFI TSU	119	0.00060928	Component	Waste
622350	6B - Wastewater Handling	4.D.1 - Domestic Wastewaster Treatment and Discharge	METHANE	Other (e.g. compiled)	CH4 emission factor	Facility employing anaerobic sludge digestion	CH4 from water separated from sludge (during winter season)	Japan			11.4	mg/m3 influent				Peer-reviewed journal	TFI TSU	11.4	5.8368e-05	Component	Waste
622351	6A - Solid Waste Disposal on Land	4.A.1 - Managed Waste Disposal Sites	METHANE	Measured	CH4 emission from landfill		Old section of Fakse landfill. Waste amount: 0.60x106 tonnes.				32.6	kg CH4/h				Peer-reviewed journal	TFI TSU	32.6	32600	Site	Waste
622352	6A - Solid Waste Disposal on Land	4.A.1 - Managed Waste Disposal Sites	METHANE	Measured	CH4 emissions from landfill		New section of Fakse landfill				10.3	kg CH4/h				Peer-reviewed journal	TFI TSU	10.3	10300	Site	Waste
622353	6A - Solid Waste Disposal on Land	4.A.1 - Managed Waste Disposal Sites	METHANE	Measured	CH4 emissions from compost area of landfill		New section of Fakse landfill				0.5	kg CH4/h				Peer-reviewed journal	TFI TSU	0.5	500	Site	Waste
622364	6B - Wastewater Handling	4.D - Wastewater Treatment and Discharge	METHANE	Measured	CH4 emission per person per year	The plant treats the domestic wastewater of 360,000 population equivalents (PE). The excess sludge of the plant is treated in an anaerobic digester, operating at 34 degrees centigrade. The resulting biogas is used in a combined heat and power installation that fulfills about 60% of the energy requirements of the plant.	Kralingseveer WWTP in municipality of Capelle aan den IJssel, near Rotterdam.	Netherlands			306	gCH4/person/year			Matthijs R.J. Daelman, Ellen M. van Voorthuizen, Udo G.J.M. van Dongen, Eveline I.P. Volcke, Mark C.M. van Loosdrecht. Methane emission during municipal wastewater treatment, Water Research, 2012, 46, 3657-3670	Peer-reviewed journal	TFI TSU	306	0.0349315	Component	Waste
622366	6B - Wastewater Handling	4.D - Wastewater Treatment and Discharge	METHANE	Other (e.g. compiled)	Amount of methane that is emitted from the anaerobic sludge treatment	The plant treats the domestic wastewater of 360,000 population equivalents (PE). The excess sludge of the plant is treated in an anaerobic digester, operating at 34 degrees centigrade. The resulting biogas is used in a combined heat and power installation that fulfills about 60% of the energy requirements of the plant.	Kralingseveer WWTP in municipality of Capelle aan den IJssel, near Rotterdam.	Netherlands			5.7	tonne CO2eq/d			Matthijs R.J. Daelman, Ellen M. van Voorthuizen, Udo G.J.M. van Dongen, Eveline I.P. Volcke, Mark C.M. van Loosdrecht. Methane emission during municipal wastewater treatment, Water Research, 2012, 46, 3657-3670	Peer-reviewed journal	TFI TSU	5.7	9895.83	Site	Waste
622378	6B2 - Domestic and Commercial Wastewater	4.D.1 - Domestic Wastewaster Treatment and Discharge	METHANE	Measured	CH4 emission factor for treatment of wastewater at sewage treatment plants. The emission factor is estimated by the following equasion: CH4 emission factor = Average of emission factor for water treatment processes + Average of emission factor for sludge treatment processes Each emission factor is derived by measured data.	Sewage treatment plants					0.000876	kg CH4/m3			National Greenhouse Gas Inventory Report of JAPAN, 2010	National Inventory Report (Annex I)	TFI TSU	0.000876	0.00448512	Component	Waste
622380	6B2 - Domestic and Commercial Wastewater	4.D.1 - Domestic Wastewaster Treatment and Discharge	METHANE	Measured	CH4 emission factor for treatment of vault toilet human waste and septic tank sludge collected at human waste treatment plants.	Anaerobic treatment					0.543	kgCH4/m3			National Greenhouse Gas Inventory Report of JAPAN, 2010; Actual methane emissions given in the Japan Environmental Sanitation Center Report of Analytical Survey of Methane Emissions FY1989 Commissioned by the Environmental Agency multiplied by the rate of recovery of 1-methane (90%)	National Inventory Report (Annex I)	TFI TSU	0.543	2.78016	Component	Waste
622381	6B2 - Domestic and Commercial Wastewater	4.D.1 - Domestic Wastewaster Treatment and Discharge	METHANE	Other (e.g. compiled)	CH4 emission factor for treatment of vault toilet human waste and septic tank sludge collected at human waste treatment plants.	Standard de-nitrification treatment					0.0059	kgCH4/m3			National Greenhouse Gas Inventory Report of JAPAN, 2010; Tanaka, Inoue, Matsuzawa, Osako, and Watanabe B-2(1) Research into Volumes Released from Waste Treatment Plants FY1994 Global Environment Research Fund Outcome Report	National Inventory Report (Annex I)	TFI TSU	0.0059	0.030208	Component	Waste
622382	6B2 - Domestic and Commercial Wastewater	4.D.1 - Domestic Wastewaster Treatment and Discharge	METHANE	Other (e.g. compiled)	CH4 emission factor for treatment of vault toilet human waste and septic tank sludge collected at human waste treatment plants.	High load de-nitrification treatment					0.005	kgCH4/m3			National Greenhouse Gas Inventory Report of JAPAN, 2010; Tanaka, Inoue, Matsuzawa, Osako, and Watanabe B-2(1) Research into Volumes Released from Waste Treatment Plants FY1994 Global Environment Research Fund Outcome Report	National Inventory Report (Annex I)	TFI TSU	0.005	0.0256	Component	Waste
622388	6C - Waste Incineration	4.C.1 - Waste Incineration	METHANE	Measured	CH4 emission factor for MSW incineration.	Continuous Incinerator					2.6	gCH4/t				National Inventory Report (Annex I)	TFI TSU	2.6	4.94e-05	Component	Waste
622389	6C - Waste Incineration	4.C.1 - Waste Incineration	METHANE	Measured	CH4 emission factor for MSW incineration.	Semi-Continuous Incinerator					20.9	gCH4/t				National Inventory Report (Annex I)	TFI TSU	20.9	0.0003971	Component	Waste
622390	6C - Waste Incineration	4.C.1 - Waste Incineration	METHANE	Measured	CH4 emission factor for MSW incineration.	Batch type Incinerator					13.3	gCH4/t				National Inventory Report (Annex I)	TFI TSU	13.3	0.0002527	Component	Waste
622391	6C - Waste Incineration	4.C.1 - Waste Incineration	METHANE	Measured	CH4 emission factor for gasification melting furnace.	Gasification melting furnace					7	gCH4/t			National Greenhouse Gas Inventory Report of JAPAN, 2010; Minstry of Environment, Report of the research on the state of wide-range movement and cyclical use of wastes, 2008.	National Inventory Report (Annex I)	TFI TSU	7	0.000133	Component	Waste
622396	6C - Waste Incineration	4.C.1 - Waste Incineration	METHANE	Measured	CH4 emission factor for waste paper, waste wood (ISW) incineration	Incineratiors with countermeasures against dioxin					224.5	gCH4/t			National Greenhouse Gas Inventory Report of JAPAN, 2010; Survey Study on Improving the Accuracy of Emission Factors for Greenhouse Gas Emissions from the Waste Sector, 2010, Ministry of Environment	National Inventory Report (Annex I)	TFI TSU	224.5	0.0042655	Component	Waste
622397	6C - Waste Incineration	4.C.1 - Waste Incineration	METHANE	Measured	CH4 emission factor for waste oil (ISW) incineration	Incineratiors with countermeasures against dioxin					4	gCH4/t			National Greenhouse Gas Inventory Report of JAPAN, 2010; Survey Study on Improving the Accuracy of Emission Factors for Greenhouse Gas Emissions from the Waste Sector, 2010, Ministry of Environment	National Inventory Report (Annex I)	TFI TSU	4	7.6e-05	Component	Waste
622398	6C - Waste Incineration	4.C.1 - Waste Incineration	METHANE	Measured	CH4 emission factor for waste plastics (ISW) incineration	Incineratiors with countermeasures against dioxin					8	gCH4/t			National Greenhouse Gas Inventory Report of JAPAN, 2010; Survey Study on Improving the Accuracy of Emission Factors for Greenhouse Gas Emissions from the Waste Sector, 2010, Ministry of Environment	National Inventory Report (Annex I)	TFI TSU	8	0.000152	Component	Waste
622399	6C - Waste Incineration	4.C.1 - Waste Incineration	METHANE	Measured	CH4 emission factor for sludge (ISW) incineration	Incineratiors with countermeasures against dioxin					1.5	gCH4/t			National Greenhouse Gas Inventory Report of JAPAN, 2010; Survey Study on Improving the Accuracy of Emission Factors for Greenhouse Gas Emissions from the Waste Sector, 2010, Ministry of Environment	National Inventory Report (Annex I)	TFI TSU	1.5	2.85e-05	Component	Waste
622438	6A2 - Unmanaged Waste Disposal Sites	4.A.2 - Unmanaged Waste Disposal Sites	METHANE	Modeled	Methane emission from landfill	Bhalswa landfill	L0 = 54.4 m3/Mg	Delhi, India			8.1	Gg/yr				Peer-reviewed journal	TFI TSU	8.1	924658	Site	Waste
622439	6A2 - Unmanaged Waste Disposal Sites	4.A.2 - Unmanaged Waste Disposal Sites	METHANE	Modeled	Methane emission from landfill	Bhalswa landfill	L0 = 70.2 m3/Mg	Delhi, India			10.5	Gg/yr				Peer-reviewed journal	TFI TSU	10.5	1.19863e+06	Site	Waste
622440	6A2 - Unmanaged Waste Disposal Sites	4.A.2 - Unmanaged Waste Disposal Sites	METHANE	Modeled	Methane emission from landfill	Bhalswa landfill	L0 = 64.3 m3/Mg	Delhi, India			9.6	Gg/yr				Peer-reviewed journal	TFI TSU	9.6	1.09589e+06	Site	Waste
622441	6A2 - Unmanaged Waste Disposal Sites	4.A.2 - Unmanaged Waste Disposal Sites	METHANE	Modeled	Methane emission from landfill	Okhla landfill	L0 = 54.4 m3/Mg	Delhi, India			5.7	Gg/yr				Peer-reviewed journal	TFI TSU	5.7	650685	Site	Waste
622442	6A2 - Unmanaged Waste Disposal Sites	4.A.2 - Unmanaged Waste Disposal Sites	METHANE	Modeled	Methane emission from landfill	Okhla landfill	L0 = 70.2 m3/Mg	Delhi, India			7.3	Gg/yr				Peer-reviewed journal	TFI TSU	7.3	833333	Site	Waste
622443	6A2 - Unmanaged Waste Disposal Sites	4.A.2 - Unmanaged Waste Disposal Sites	METHANE	Modeled	Methane emission from landfill	Okhla landfill	L0 = 64.3 m3/Mg	Delhi, India			6.7	Gg/yr				Peer-reviewed journal	TFI TSU	6.7	764840	Site	Waste
622445	6A - Solid Waste Disposal on Land	4.A.1 - Managed Waste Disposal Sites	METHANE	Measured	CH4 emissions from sludge pit of landfill		New section of Fakse landfill	Denmark			2.4	kg CH4/h				Peer-reviewed journal	TFI TSU	2.4	2400	Component	Waste
622447	6A - Solid Waste Disposal on Land	4.A.1 - Managed Waste Disposal Sites	METHANE	Measured	CH4 emissions from pump station of landfill		Old section of Fakse landfill	Denmark			3.8	kg CH4/h				Peer-reviewed journal	TFI TSU	3.8	3800	Component	Waste
622448	6A - Solid Waste Disposal on Land	4.A.1 - Managed Waste Disposal Sites	METHANE	Measured	CH4 emissions from leachate collection well of landfill		New section of Fakse landfill	Denmark			4.3	kg CH4/h				Peer-reviewed journal	TFI TSU	4.3	4300	Component	Waste
622452	6B - Wastewater Handling	4.D - Wastewater Treatment and Discharge	METHANE	Measured	Methane emissions from water and sludge treatment (yearly average)	Sewage treatment plant (named M-STP) in Sendai city in Japan. The plant treats 327178 m3 of municipal wastewater per day.		Japan			1.15	g CH4/m3 influent			Masuda, S., Suzuki, S., Sano, I., Li, Y.Y., Nishimura, O. The seasonal variation of emission of greenhouse gases from a full-scale sewage treatment plant, Chemosphere, 2015, 140, 167-173	Peer-reviewed journal	TFI TSU	1.15	0.005888	Component	Waste
622486	6B - Wastewater Handling	4.D.1 - Domestic Wastewaster Treatment and Discharge	METHANE	Other (e.g. compiled)	CH4 emission factor	Facility employing anaerobic sludge digestion	CH4 from water separated from sludge (during summer season)	Japan			0.47	mg/m3 influent				Peer-reviewed journal	TFI TSU	0.47	2.4064e-06	Component	Waste
622487	6B - Wastewater Handling	4.D.1 - Domestic Wastewaster Treatment and Discharge	METHANE	Other (e.g. compiled)	CH4 emission factor	Facility without anaerobic sludge digestion	CH4 from water separated from sludge i(during winter season)	Japan			19.4	mg/m3 influent				Peer-reviewed journal	TFI TSU	19.4	9.9328e-05	Component	Waste
622488	6B - Wastewater Handling	4.D.1 - Domestic Wastewaster Treatment and Discharge	METHANE	Other (e.g. compiled)	CH4 emission factor	Facility without anaerobic sludge digestion	CH4 from water separated from sludge in facility (during summer season)	Japan			2.86	mg/m3 influent				Peer-reviewed journal	TFI TSU	2.86	1.46432e-05	Component	Waste
622493	6B - Wastewater Handling	4.D.1 - Domestic Wastewaster Treatment and Discharge	METHANE	Other (e.g. compiled)	CH4 emission factor	Facility with anaerobic sludge digestion	CH4 from dewatering process (during winter season)	Japan			667	mg/m3 influent				Peer-reviewed journal	TFI TSU	667	0.00341504	Component	Waste
622494	6B - Wastewater Handling	4.D.1 - Domestic Wastewaster Treatment and Discharge	METHANE	Other (e.g. compiled)	CH4 emission factor	Facility with anaerobic sludge digestion	CH4 from dewatering process (during summer season)	Japan			99.7	mg/m3 influent				Peer-reviewed journal	TFI TSU	99.7	0.000510464	Component	Waste
622495	6B - Wastewater Handling	4.D.1 - Domestic Wastewaster Treatment and Discharge	METHANE	Other (e.g. compiled)	CH4 emission factor	Facility without anaerobic sludge digestion	CH4 from dewatering process (during winter season)	Japan			127	mg/m3 influent				Peer-reviewed journal	TFI TSU	127	0.00065024	Component	Waste
622496	6B - Wastewater Handling	4.D.1 - Domestic Wastewaster Treatment and Discharge	METHANE	Other (e.g. compiled)	CH4 emission factor	Facility without anaerobic sludge digestion	CH4 from dewatering process (during summer season)	Japan			219	mg/m3 influent				Peer-reviewed journal	TFI TSU	219	0.00112128	Component	Waste
622500	6B - Wastewater Handling	4.D.1 - Domestic Wastewaster Treatment and Discharge	METHANE	Other (e.g. compiled)	CH4 emission factor	Sewage treatment facility with anaerobic sludge digestion		Japan			509	mg/m3 influent				Peer-reviewed journal	TFI TSU	509	0.00260608	Component	Waste
622502	6B2 - Domestic and Commercial Wastewater	4.D.1 - Domestic Wastewaster Treatment and Discharge	METHANE	Measured	CH4 emission factor	small scale domestic wastewater treatment facilities with aeration; Johkasou (National structure standards-compatible type)	Summer season (26.2 and 25.9 degree celsius at air and wastewater, respectively)	Japan			3568	g/capita/year			Yoshitaka Ebie, Hiroshi Yamazaki, Shigeaki Inamura, Yusuke Jimbo, Takuro Kobayashi, Hiroyuki Ueda (2014) Development of Emissions Factor for the Decentralized Domestic Wastewater Treatment for the National Greenhouse Gas Inventory, Journal of Water and Environment Technology, 12(1), 33-41.	Peer-reviewed journal	Yoshitaka Ebie, Japan	3568	0.407306	Component	Waste
622503	6B2 - Domestic and Commercial Wastewater	4.D.1 - Domestic Wastewaster Treatment and Discharge	METHANE	Measured	CH4 emission factor	small scale domestic wastewater treatment facilities with aeration; Johkasou (National structure standards-compatible type)	Winter season (-2.8 and 11.1 degree celsius at air and wastewater, respectively)	Japan			1385	g/capita/year			Yoshitaka Ebie, Hiroshi Yamazaki, Shigeaki Inamura, Yusuke Jimbo, Takuro Kobayashi, Hiroyuki Ueda (2014) Development of Emissions Factor for the Decentralized Domestic Wastewater Treatment for the National Greenhouse Gas Inventory, Journal of Water and Environment Technology, 12(1), 33-41.	Peer-reviewed journal	Yoshitaka Ebie, Japan	1385	0.158105	Component	Waste
622504	6B2 - Domestic and Commercial Wastewater	4.D.1 - Domestic Wastewaster Treatment and Discharge	METHANE	Measured	CH4 emission factor	small scale domestic wastewater treatment facilities with aeration; Johkasou (BOD removal type)	Summer season (30.3 and 24.3 degree celsius at air and wastewater, respectively)	Japan			2400	g/capita/year			Yoshitaka Ebie, Hiroshi Yamazaki, Shigeaki Inamura, Yusuke Jimbo, Takuro Kobayashi, Hiroyuki Ueda (2014) Development of Emissions Factor for the Decentralized Domestic Wastewater Treatment for the National Greenhouse Gas Inventory, Journal of Water and Environment Technology, 12(1), 33-41.	Peer-reviewed journal	Yoshitaka Ebie, Japan	2400	0.273973	Component	Waste
622505	6B2 - Domestic and Commercial Wastewater	4.D.1 - Domestic Wastewaster Treatment and Discharge	METHANE	Measured	CH4 emission factor	small scale domestic wastewater treatment facilities with aeration; Johkasou (BOD removal type)	Winter season (-2.2 and 8.5 degree celsius at air and wastewater, respectively)	Japan			1568	g/capita/year			Yoshitaka Ebie, Hiroshi Yamazaki, Shigeaki Inamura, Yusuke Jimbo, Takuro Kobayashi, Hiroyuki Ueda (2014) Development of Emissions Factor for the Decentralized Domestic Wastewater Treatment for the National Greenhouse Gas Inventory, Journal of Water and Environment Technology, 12(1), 33-41.	Peer-reviewed journal	Yoshitaka Ebie, Japan	1568	0.178995	Component	Waste
622506	6B2 - Domestic and Commercial Wastewater	4.D.1 - Domestic Wastewaster Treatment and Discharge	METHANE	Measured	CH4 emission factor	small scale domestic wastewater treatment facilities with aeration; Johkasou (BOD and Nitrogen removal type)	Summer season (29.3 and 26.1 degree celsius at air and wastewater, respectively)	Japan			1739	g/capita/year			Yoshitaka Ebie, Hiroshi Yamazaki, Shigeaki Inamura, Yusuke Jimbo, Takuro Kobayashi, Hiroyuki Ueda (2014) Development of Emissions Factor for the Decentralized Domestic Wastewater Treatment for the National Greenhouse Gas Inventory, Journal of Water and Environment Technology, 12(1), 33-41.	Peer-reviewed journal	Yoshitaka Ebie, Japan	1739	0.198516	Component	Waste
622507	6B2 - Domestic and Commercial Wastewater	4.D.1 - Domestic Wastewaster Treatment and Discharge	METHANE	Measured	CH4 emission factor	small scale domestic wastewater treatment facilities with aeration; Johkasou (BOD and Nitrogen removal type)	Winter season (0.8 and 11.1 degree celsius at air and wastewater, respectively)	Japan			349	g/capita/year			Yoshitaka Ebie, Hiroshi Yamazaki, Shigeaki Inamura, Yusuke Jimbo, Takuro Kobayashi, Hiroyuki Ueda (2014) Development of Emissions Factor for the Decentralized Domestic Wastewater Treatment for the National Greenhouse Gas Inventory, Journal of Water and Environment Technology, 12(1), 33-41.	Peer-reviewed journal	Yoshitaka Ebie, Japan	349	0.0398402	Component	Waste
622508	6B2 - Domestic and Commercial Wastewater	4.D.1 - Domestic Wastewaster Treatment and Discharge	METHANE	Measured	CH4 emission factor	small scale black water treatment facilities with aeration; Johkasou treating night soil only	Summer season (30.2 and 23.7 degree celsius at air and wastewater, respectively)	Japan			810	g/capita/year			Yoshitaka Ebie, Hiroshi Yamazaki, Shigeaki Inamura, Yusuke Jimbo, Takuro Kobayashi, Hiroyuki Ueda (2014) Development of Emissions Factor for the Decentralized Domestic Wastewater Treatment for the National Greenhouse Gas Inventory, Journal of Water and Environment Technology, 12(1), 33-41.	Peer-reviewed journal	Yoshitaka Ebie, Japan	810	0.0924658	Component	Waste
622509	6B2 - Domestic and Commercial Wastewater	4.D.1 - Domestic Wastewaster Treatment and Discharge	METHANE	Measured	CH4 emission factor	small scale black water treatment facilities with aeration; Johkasou treating night soil only	Winter season (0.4 and 6.3 degree celsius at air and wastewater, respectively)	Japan			110	g/capita/year			Yoshitaka Ebie, Hiroshi Yamazaki, Shigeaki Inamura, Yusuke Jimbo, Takuro Kobayashi, Hiroyuki Ueda (2014) Development of Emissions Factor for the Decentralized Domestic Wastewater Treatment for the National Greenhouse Gas Inventory, Journal of Water and Environment Technology, 12(1), 33-41.	Peer-reviewed journal	Yoshitaka Ebie, Japan	110	0.0125571	Component	Waste
622510	6B2 - Domestic and Commercial Wastewater	4.D.1 - Domestic Wastewaster Treatment and Discharge	METHANE	Measured	CH4 emission factor	small scale storage tank for human waste; vault toilet	Summer season (29.4 and 22.9 degree celsius at air and wastewater, respectively)	Japan			117.4	g/capita/year			Yoshitaka Ebie, Hiroshi Yamazaki, Shigeaki Inamura, Yusuke Jimbo, Takuro Kobayashi, Hiroyuki Ueda (2014) Development of Emissions Factor for the Decentralized Domestic Wastewater Treatment for the National Greenhouse Gas Inventory, Journal of Water and Environment Technology, 12(1), 33-41.	Peer-reviewed journal	Yoshitaka Ebie, Japan	117.4	0.0134018	Component	Waste
622511	6B2 - Domestic and Commercial Wastewater	4.D.1 - Domestic Wastewaster Treatment and Discharge	METHANE	Measured	CH4 emission factor	small scale storage tank for human waste; vault toilet	Winter season (-1.3 and 3.7 degree celsius at air and wastewater, respectively)	Japan			6.2	g/capita/year			Yoshitaka Ebie, Hiroshi Yamazaki, Shigeaki Inamura, Yusuke Jimbo, Takuro Kobayashi, Hiroyuki Ueda (2014) Development of Emissions Factor for the Decentralized Domestic Wastewater Treatment for the National Greenhouse Gas Inventory, Journal of Water and Environment Technology, 12(1), 33-41.	Peer-reviewed journal	Yoshitaka Ebie, Japan	6.2	0.000707763	Component	Waste
622531	6A1 - Managed Waste Disposal on Land	4.A.1 - Managed Waste Disposal Sites	METHANE	Measured	Methane emission rates	Modern landfills		United Kingdom of Great Britain and Northern Ireland. Temperate maritime climate with rainfall rates decreasing from west to east of the country.			0.14 +/- 0.0854	kg s-1			"Measuring landfill methane emissions using unmanned aerial systems: field trial and operational guidance" Evidence Report SC140015. Published by: Environment Agency, Horizon House, Deanery Road, Bristol, BS1 5AH, United Kingdom. Authors: Allen, G., Pitt, J., Hollingsworth, P., Mead, I., Kabbebe, K., Roberts, G and Percival, C. November 2015.	Other	Dr Keith A Brown, United Kingdom of Great Britain and Northern Ireland	0.14	504000	Site	Waste
622532	6A1 - Managed Waste Disposal on Land	4.A.1 - Managed Waste Disposal Sites	METHANE	Measured	Methane emission rates	Modern landfills		United Kingdom of Great Britain and Northern Ireland. Temperate maritime climate with rainfall rates decreasing from west to east of the country.			0.0504 +/- 0.0272	kg s-1			"Measuring landfill methane emissions using unmanned aerial systems: field trial and operational guidance" Evidence Report SC140015. Published by: Environment Agency, Horizon House, Deanery Road, Bristol, BS1 5AH, United Kingdom. Authors: Allen, G., Pitt, J., Hollingsworth, P., Mead, I., Kabbebe, K., Roberts, G and Percival, C. November 2015.	Other	Dr Keith A Brown, United Kingdom of Great Britain and Northern Ireland	0.0504	181440	Site	Waste
622533	6A1 - Managed Waste Disposal on Land	4.A.1 - Managed Waste Disposal Sites	METHANE	Measured	Methane emission rates	Modern landfills		United Kingdom of Great Britain and Northern Ireland. Temperate maritime climate with rainfall rates decreasing from west to east of the country.			0.148 +/- 0.0260	kg s-1			"Measuring landfill methane emissions using unmanned aerial systems: field trial and operational guidance" Evidence Report SC140015. Published by: Environment Agency, Horizon House, Deanery Road, Bristol, BS1 5AH, United Kingdom. Authors: Allen, G., Pitt, J., Hollingsworth, P., Mead, I., Kabbebe, K., Roberts, G and Percival, C. November 2015.	Other	Dr Keith A Brown, United Kingdom of Great Britain and Northern Ireland	0.148	532800	Site	Waste
623143	6D - Other (please specify)	4.B - Biological Treatment of Solid Waste	METHANE	Measured	Emission factor	Yard waste, mixed with wood chip or chopped branch	Summer	California ,USA	Windrow		0.022	kg C/ ton dry waste/day	Equation 4.1, Chapter 4, Volume 5 of the 2006 IPCC Guidelines		Xia Zhu-Barker, Shannon K. Bailey, Kyaw Tha Paw U, Martin Burger, William R. Horwath (2017) Greenhouse gas emissions from green waste composting windrow, Waste Management 59, 70-79.	Peer-reviewed journal	TFI TSU	0.022	5.58215e-07	Component	Waste
623145	6D - Other (please specify)	4.B - Biological Treatment of Solid Waste	METHANE	Measured	Emission factor	Yard waste, mixed with wood chip or chopped branch	Winter	California ,USA	Windrow		0.254	kg C/ ton dry waste/day	Equation 4.1, Chapter 4, Volume 5 of the 2006 IPCC Guidelines		Xia Zhu-Barker, Shannon K. Bailey, Kyaw Tha Paw U, Martin Burger, William R. Horwath (2017) Greenhouse gas emissions from green waste composting windrow, Waste Management 59, 70-79.	Peer-reviewed journal	TFI TSU	0.254	6.44485e-06	Component	Waste
623147	6D - Other (please specify)	4.B - Biological Treatment of Solid Waste	METHANE	Measured	Emission factor	Yard waste, mixed with wood chip or chopped branch	Spring	California ,USA	Windrow		0.039	kg C/ ton dry waste/day	Equation 4.1, Chapter 4, Volume 5 of the 2006 IPCC Guidelines		Xia Zhu-Barker, Shannon K. Bailey, Kyaw Tha Paw U, Martin Burger, William R. Horwath (2017) Greenhouse gas emissions from green waste composting windrow, Waste Management 59, 70-79.	Peer-reviewed journal	TFI TSU	0.039	9.89563e-07	Component	Waste
623150	6C - Waste Incineration	4.C.1 - Waste Incineration	METHANE	Measured	Methane Emission Factor from waste incineration	Rotary kiln (Plant G as per Hwang et al. 2017)		Korea		range of values	84.35	gCH4/tonne waste			Hwang KL, Choi SM, Kim MK, Heo JB, Zoh KD (2017) Emission of greenhouse gases from waste incineration in Korea. J Environ Manage 196: 710-718.	Peer-reviewed journal	TFI TSU	84.35	0.00160265	Component	Waste
623152	6C - Waste Incineration	4.C.1 - Waste Incineration	METHANE	Measured	Methane Emission Factor for MSW incineration	Fluidized (Plant C as per Hwang et al. 2017)	Methane emission measured by type of plant	Korea			22.56	gCH4/tonne waste			Hwang KL, Choi SM, Kim MK, Heo JB, Zoh KD (2017) Emission of greenhouse gases from waste incineration in Korea. J Environ Manage 196: 710-718.	Peer-reviewed journal	TFI TSU	22.56	0.00042864	Component	Waste
623154	6C - Waste Incineration	4.C.1 - Waste Incineration	METHANE	Measured	Methane Emission Factor for MSW incineration	Kiln & Stoker (Plant D,F, H and I as per Hwang et al. 2017)	Methane emission measured by type of plant	Korea			34.44-87.19	gCH4/tonne waste			Hwang KL, Choi SM, Kim MK, Heo JB, Zoh KD (2017) Emission of greenhouse gases from waste incineration in Korea. J Environ Manage 196: 710-718.	Peer-reviewed journal	TFI TSU	60.815	0.00115548	Component	Waste
623156	6C - Waste Incineration	4.C.1 - Waste Incineration	METHANE	Measured	Methane Emission Factor for MSW incineration	Stoker (Plant E,G,H and I as per Hwang et al. 2017)		Korea			57.84-98.34	gCH4/tonne			Hwang KL, Choi SM, Kim MK, Heo JB, Zoh KD (2017) Emission of greenhouse gases from waste incineration in Korea. J Environ Manage 196: 710-718.	Peer-reviewed journal	TFI TSU	78.09	0.00148371	Component	Waste
624074	6A3 - Other (please specify)	4.B - Biological Treatment of Solid Waste	METHANE	Measured	Emission factor for Anaerobic Digestion of food waste			Republic of Korea			1.14	g CH4/kg waste treated			Jeong, S., Moon, S., Park, J., Kim, J.Y. Field measurement of greenhouse gas emissions from biological treatment facilities of food waste in Republic of Korea, Waste Manag Res. 2019, 37(5), 452-460	Peer-reviewed journal	IPCC TFI TSU	1.14	0.02166	Component	Waste
624076	6A3 - Other (please specify)	4.B - Biological Treatment of Solid Waste	METHANE	Measured	Emission factor for Composting of food waste			Republic of Korea			0.17-0.19	g CH4/kg waste treated			Jeong, S., Moon, S., Park, J., Kim, J.Y. Field measurement of greenhouse gas emissions from biological treatment facilities of food waste in Republic of Korea, Waste Manag Res. 2019, 37(5), 452-460	Peer-reviewed journal	IPCC TFI TSU	0.18	0.00342	Component	Waste
624223	6A1 - Managed Waste Disposal on Land	4.A.1 - Managed Waste Disposal Sites	METHANE	Measured	CH4 emissions	Semi-aerobic (SM) test cell	High moisture wastes and tropical climate. Dry condition.	Thailand/Tropical climate		Semi-aerobic landfill test cell case	20.95	g/t dry wt./d			Sutthasil, N., Chiemchaisri, C., Chiemchaisri, W., Wangyao, K., Endo, K., Ishigaki, T., Yamada, M. The effectiveness of passive gas ventilation on methane emission reduction in a semi-aerobic test cell operated in the tropics, Waste Management, 2019, 87 954-964	Peer-reviewed journal	IPCC TFI TSU	20.95	0.872917	Component	Waste
624224	6A1 - Managed Waste Disposal on Land	4.A.1 - Managed Waste Disposal Sites	METHANE	Measured	CH4 emissions	Semi-aerobic (SM) test cell	High moisture wastes and tropical climate. Wet condition.	Thailand/Tropical climate		Semi-aerobic landfill test cell case	61.67	g/t dry wt./d			Sutthasil, N., Chiemchaisri, C., Chiemchaisri, W., Wangyao, K., Endo, K., Ishigaki, T., Yamada, M. The effectiveness of passive gas ventilation on methane emission reduction in a semi-aerobic test cell operated in the tropics, Waste Management, 2019, 87 954-964	Peer-reviewed journal	IPCC TFI TSU	61.67	2.56958	Component	Waste
624227	6A1 - Managed Waste Disposal on Land	4.A.1 - Managed Waste Disposal Sites	METHANE	Measured	CH4 emissions	The control (CT) test cell	High moisture wastes and tropical climate. Dry condition.	Thailand/Tropical climate		Semi-aerobic landfill - control test cell case	60.32	g/t dry wt./d			Sutthasil, N., Chiemchaisri, C., Chiemchaisri, W., Wangyao, K., Endo, K., Ishigaki, T., Yamada, M. The effectiveness of passive gas ventilation on methane emission reduction in a semi-aerobic test cell operated in the tropics, Waste Management, 2019, 87 954-964	Peer-reviewed journal	IPCC TFI TSU	60.32	2.51333	Component	Waste
624228	6A1 - Managed Waste Disposal on Land	4.A.1 - Managed Waste Disposal Sites	METHANE	Measured	CH4 emissions	The control (CT) test cell	High moisture wastes and tropical climate. Wet condition.	Thailand/Tropical climate		Semi-aerobic landfill - control test cell case	120.33	g/t dry wt./d			Sutthasil, N., Chiemchaisri, C., Chiemchaisri, W., Wangyao, K., Endo, K., Ishigaki, T., Yamada, M. The effectiveness of passive gas ventilation on methane emission reduction in a semi-aerobic test cell operated in the tropics, Waste Management, 2019, 87 954-964	Peer-reviewed journal	IPCC TFI TSU	120.33	5.01375	Component	Waste
624477	6D - Other (please specify)	4.B - Biological Treatment of Solid Waste	METHANE	Measured	Emission factor	Composting	Municipal solid waste. Waste type: Wood (garden and park waste)	Japan			0.35	kg CH4/t	Equation 4.1 on page 4.5 in Chapter 4, Vol.5 of the 2006 Guidelines		Ministry of the Environment, Committee for the Greenhouse Gases Emissions Estimation Methods, Review of Greenhouse Gases Emissions Estimation Methods, Waste Sector, Part 2, 2018.	National Inventory Report (Annex I)	Tomonori Ishigaki, Japan	0.35	0.00665	Component	Waste
624478	6D - Other (please specify)	4.B - Biological Treatment of Solid Waste	METHANE	Measured	Emission factor	Composting	Municipal solid waste. Waste type: Food waste	Japan			0.96	kg CH4/t	Equation 4.1 on page 4.5 in Chapter 4, Vol.5 of the 2006 Guidelines		Ministry of the Environment, Committee for the Greenhouse Gases Emissions Estimation Methods, Review of Greenhouse Gases Emissions Estimation Methods, Waste Sector, Part 2, 2018.	National Inventory Report (Annex I)	Tomonori Ishigaki, Japan	0.96	0.01824	Component	Waste
624479	6D - Other (please specify)	4.B - Biological Treatment of Solid Waste	METHANE	Measured	Emission factor	Composting	Municipal solid waste. Waste type: Paper/cardboard	Japan			0.96	kg CH4/t	Equation 4.1 on page 4.5 in Chapter 4, Vol.5 of the 2006 Guidelines		Ministry of the Environment, Committee for the Greenhouse Gases Emissions Estimation Methods, Review of Greenhouse Gases Emissions Estimation Methods, Waste Sector, Part 2, 2018.	National Inventory Report (Annex I)	Tomonori Ishigaki, Japan	0.96	0.01824	Component	Waste
624480	6D - Other (please specify)	4.B - Biological Treatment of Solid Waste	METHANE	Measured	Emission factor	Composting	Municipal solid waste. Waste type: Textile	Japan			0.96	kg CH4/t	Equation 4.1 on page 4.5 in Chapter 4, Vol.5 of the 2006 Guidelines		Ministry of the Environment, Committee for the Greenhouse Gases Emissions Estimation Methods, Review of Greenhouse Gases Emissions Estimation Methods, Waste Sector, Part 2, 2018.	National Inventory Report (Annex I)	Tomonori Ishigaki, Japan	0.96	0.01824	Component	Waste
624481	6D - Other (please specify)	4.B - Biological Treatment of Solid Waste	METHANE	Measured	Emission factor	Composting	Municipal solid waste. Waste type: Human waste/Johkaso slufge	Japan			0.96	kg CH4/t	Equation 4.1 on page 4.5 in Chapter 4, Vol.5 of the 2006 Guidelines		Ministry of the Environment, Committee for the Greenhouse Gases Emissions Estimation Methods, Review of Greenhouse Gases Emissions Estimation Methods, Waste Sector, Part 2, 2018.	National Inventory Report (Annex I)	Tomonori Ishigaki, Japan	0.96	0.01824	Component	Waste
624482	6D - Other (please specify)	4.B - Biological Treatment of Solid Waste	METHANE	Measured	Emission factor	Composting	Industrial solid waste. Waste type: Food waste (animal and vegetable residues, other food waste)	Japan			0.96	kg CH4/t	Equation 4.1 on page 4.5 in Chapter 4, Vol.5 of the 2006?Guidelines		Ministry of the Environment, Committee for the Greenhouse Gases Emissions Estimation Methods, Review of Greenhouse Gases Emissions Estimation Methods, Waste Sector, Part 2, 2018.	National Inventory Report (Annex I)	Tomonori Ishigaki, Japan	0.96	0.01824	Component	Waste
624483	6D - Other (please specify)	4.B - Biological Treatment of Solid Waste	METHANE	Measured	Emission factor	Composting	Industrial solid waste. Waste type: Sewage sludge	Japan			0.96	kg CH4/t	Equation 4.1 on page 4.5 in Chapter 4, Vol.5 of the 2006?Guidelines		Ministry of the Environment, Committee for the Greenhouse Gases Emissions Estimation Methods, Review of Greenhouse Gases Emissions Estimation Methods, Waste Sector, Part 2, 2018.	National Inventory Report (Annex I)	Tomonori Ishigaki, Japan	0.96	0.01824	Component	Waste
624501	6C - Waste Incineration	4.C - Incineration and Open Burning of Waste	METHANE	Measured	CH4 emission factor	Continuous incinerator. MSW.		Japan			2.7	g/ton waste	Equation 5.4 on page 5.12 in Vol.5 of the 2006 Guidelines		Ministry of the Environment (2010) Survey Study on Improving the Accuracy of Emission Factors for Greenhouse Gas Emissions from the Waste Sector; Iwasaki, Tatsuichi, Ueno (1992), Review of Causes of Emissions of Nitrous Oxide and Methane from Waste Incinerators, Annual Report of the Tokyo Metropolitan Research Institute for Environmental Protection; -> Ref.72. Chap7 in NIR Ishikawa Prefecture, Ci…	National Inventory Report (Annex I)	Tomonori Ishigaki, Japan	2.7	5.13e-05	Component	Waste
624502	6C - Waste Incineration	4.C - Incineration and Open Burning of Waste	METHANE	Measured	CH4 emission factor	Semi-continuous incinerator. MSW.		Japan			20.4	g/ton waste	Equation 5.4 on page 5.12 in Vol.5 of the 2006 Guidelines		Ministry of the Environment (2010) Survey Study on Improving the Accuracy of Emission Factors for Greenhouse Gas Emissions from the Waste Sector; Iwasaki, Tatsuichi, Ueno (1992), Review of Causes of Emissions of Nitrous Oxide and Methane from Waste Incinerators, Annual Report of the Tokyo Metropolitan Research Institute for Environmental Protection; -> Ref.72. Chap7 in NIR Ishikawa Prefecture, Ci…	National Inventory Report (Annex I)	Tomonori Ishigaki, Japan	20.4	0.0003876	Component	Waste
624503	6C - Waste Incineration	4.C - Incineration and Open Burning of Waste	METHANE	Measured	CH4 emission factor	Batch type incinerator. MSW.		Japan			11.8	g/ton waste	Equation 5.4 on page 5.12 in Vol.5 of the 2006 Guidelines		Ministry of the Environment (2010) Survey Study on Improving the Accuracy of Emission Factors for Greenhouse Gas Emissions from the Waste Sector; Iwasaki, Tatsuichi, Ueno (1992), Review of Causes of Emissions of Nitrous Oxide and Methane from Waste Incinerators, Annual Report of the Tokyo Metropolitan Research Institute for Environmental Protection; -> Ref.72. Chap7 in NIR Ishikawa Prefecture, Ci…	National Inventory Report (Annex I)	Tomonori Ishigaki, Japan	11.8	0.0002242	Component	Waste
624504	6C - Waste Incineration	4.C - Incineration and Open Burning of Waste	METHANE	Measured	CH4 emission factor	Gasification melting furnace. MSW.		Japan			6.9	g/ton waste	Equation 5.4 on page 5.12 in Vol.5 of the 2006 Guidelines		Ministry of the Environment (2010) Survey Study on Improving the Accuracy of Emission Factors for Greenhouse Gas Emissions from the Waste Sector; Iwasaki, Tatsuichi, Ueno (1992), Review of Causes of Emissions of Nitrous Oxide and Methane from Waste Incinerators, Annual Report of the Tokyo Metropolitan Research Institute for Environmental Protection; -> Ref.72. Chap7 in NIR Ishikawa Prefecture, Ci…	National Inventory Report (Annex I)	Tomonori Ishigaki, Japan	6.9	0.0001311	Component	Waste
624515	6C - Waste Incineration	4.C - Incineration and Open Burning of Waste	METHANE	Measured	CH4 emission factor of waste oil in industrial waste			Japan			4.0	g/ton waste	Equation 5.4 on page 5.12 in Vol.5 of the 2006 Guidelines		Iwasaki, Tatsuichi, Ueno (1992), Review of Causes of Emissions of Nitrous Oxide and Methane from Waste Incinerators, Annual Report of the Tokyo Metropolitan Research Institute for Environmental Protection; Japan Society of Atmospheric Environment (1997) Report on Emission Factor Results for Combustion Facilities; Ishikawa Prefecture, City of Osaka, Kanagawa Prefecture, City of Kyoto, Hiroshima Pr…	National Inventory Report (Annex I)	Tomonori Ishigaki, Japan	4	7.6e-05	Component	Waste
624516	6C - Waste Incineration	4.C - Incineration and Open Burning of Waste	METHANE	Measured	CH4 emission factor of plastics in industrial waste			Japan			8.0	g/ton waste	Equation 5.4 on page 5.12 in Vol.5 of the 2006 Guidelines		Iwasaki, Tatsuichi, Ueno (1992), Review of Causes of Emissions of Nitrous Oxide and Methane from Waste Incinerators, Annual Report of the Tokyo Metropolitan Research Institute for Environmental Protection; Japan Society of Atmospheric Environment (1997) Report on Emission Factor Results for Combustion Facilities; Ishikawa Prefecture, City of Osaka, Kanagawa Prefecture, City of Kyoto, Hiroshima Pr…	National Inventory Report (Annex I)	Tomonori Ishigaki, Japan	8	0.000152	Component	Waste
624517	6C - Waste Incineration	4.C - Incineration and Open Burning of Waste	METHANE	Measured	CH4 emission factor of paper/cardboard in industrial waste			Japan			225	g/ton waste	Equation 5.4 on page 5.12 in Vol.5 of the 2006 Guidelines		Iwasaki, Tatsuichi, Ueno (1992), Review of Causes of Emissions of Nitrous Oxide and Methane from Waste Incinerators, Annual Report of the Tokyo Metropolitan Research Institute for Environmental Protection; Ministry of the Environment, Committee for the Greenhouse Gases Emissions Estimation Methods (2006) Review of Greenhouse Gases Emissions Estimation Methods; Japan Society of Atmospheric Environ…	National Inventory Report (Annex I)	Tomonori Ishigaki, Japan	225	0.004275	Component	Waste
624518	6C - Waste Incineration	4.C - Incineration and Open Burning of Waste	METHANE	Measured	CH4 emission factor of wood in industrial waste			Japan			225	g/ton waste	Equation 5.4 on page 5.12 in Vol.5 of the 2006 Guidelines		Iwasaki, Tatsuichi, Ueno (1992), Review of Causes of Emissions of Nitrous Oxide and Methane from Waste Incinerators, Annual Report of the Tokyo Metropolitan Research Institute for Environmental Protection; Ministry of the Environment, Committee for the Greenhouse Gases Emissions Estimation Methods (2006) Review of Greenhouse Gases Emissions Estimation Methods; Japan Society of Atmospheric Environ…	National Inventory Report (Annex I)	Tomonori Ishigaki, Japan	225	0.004275	Component	Waste
624519	6C - Waste Incineration	4.C - Incineration and Open Burning of Waste	METHANE	Measured	CH4 emission factor of textiles (natural fiber) in industrial waste			Japan			225	g/ton waste	Equation 5.4 on page 5.12 in Vol.5 of the 2006 Guidelines		Iwasaki, Tatsuichi, Ueno (1992), Review of Causes of Emissions of Nitrous Oxide and Methane from Waste Incinerators, Annual Report of the Tokyo Metropolitan Research Institute for Environmental Protection; Ministry of the Environment, Committee for the Greenhouse Gases Emissions Estimation Methods (2006) Review of Greenhouse Gases Emissions Estimation Methods; Japan Society of Atmospheric Environ…	National Inventory Report (Annex I)	Tomonori Ishigaki, Japan	225	0.004275	Component	Waste
624520	6C - Waste Incineration	4.C - Incineration and Open Burning of Waste	METHANE	Measured	CH4 emission factor of animal and vegetable residues/animal carcassess in industrial waste			Japan			225	g/ton waste	Equation 5.4 on page 5.12 in Vol.5 of the 2006 Guidelines		Iwasaki, Tatsuichi, Ueno (1992), Review of Causes of Emissions of Nitrous Oxide and Methane from Waste Incinerators, Annual Report of the Tokyo Metropolitan Research Institute for Environmental Protection; Ministry of the Environment, Committee for the Greenhouse Gases Emissions Estimation Methods (2006) Review of Greenhouse Gases Emissions Estimation Methods; Japan Society of Atmospheric Environ…	National Inventory Report (Annex I)	Tomonori Ishigaki, Japan	225	0.004275	Component	Waste
624521	6C - Waste Incineration	4.C - Incineration and Open Burning of Waste	METHANE	Measured	CH4 emission factor of sludge in industrial waste			Japan			1.5	g/ton waste	Equation 5.4 on page 5.12 in Vol.5 of the 2006 Guidelines		Iwasaki, Tatsuichi, Ueno (1992), Review of Causes of Emissions of Nitrous Oxide and Methane from Waste Incinerators, Annual Report of the Tokyo Metropolitan Research Institute for Environmental Protection; Japan Society of Atmospheric Environment, Report on Emission Factor Results for Combustion Facilities, 1997; Ishikawa Prefecture, City of Osaka, Kanagawa Prefecture, City of Kyoto, Hiroshima Pr…	National Inventory Report (Annex I)	Tomonori Ishigaki, Japan	1.5	2.85e-05	Component	Waste
624522	6C - Waste Incineration	4.C - Incineration and Open Burning of Waste	METHANE	Measured	CH4 emission factor of sludge other than sewage sludge in industrial waste			Japan			1.5	g/ton waste	Equation 5.4 on page 5.12 in Vol.5 of the 2006 Guidelines		Iwasaki, Tatsuichi, Ueno (1992), Review of Causes of Emissions of Nitrous Oxide and Methane from Waste Incinerators, Annual Report of the Tokyo Metropolitan Research Institute for Environmental Protection; Japan Society of Atmospheric Environment, Report on Emission Factor Results for Combustion Facilities, 1997; Ishikawa Prefecture, City of Osaka, Kanagawa Prefecture, City of Kyoto, Hiroshima Pr…	National Inventory Report (Annex I)	Tomonori Ishigaki, Japan	1.5	2.85e-05	Component	Waste
624558	6B2 - Domestic and Commercial Wastewater	4.D.1 - Domestic Wastewaster Treatment and Discharge	METHANE	Measured	Emission factor for wastewater treatment processes in sewage treatment plant: methane	Sewage treatment plant		Japan			528.7	mg CH4/m3			Ministry of the Environment, Committee for the Greenhouse Gases Emissions Estimation Methods, Review of Greenhouse Gases Emissions Estimation Methods, February 2006; Ministry of the Environment, Japan, National Institute for Environmental Studies, Japan (2019) National Greenhouse Gas Inventory Report of Japan, 2019	National Inventory Report (Annex I)	Tomonori Ishigaki, Japan	528.7	0.00270694	Component	Waste
624559	6B2 - Domestic and Commercial Wastewater	4.D.1 - Domestic Wastewaster Treatment and Discharge	METHANE	Measured	Emission factor for sludge treatment processes in sewage treatment plant: methane	Sewage treatment plant		Japan			348.0	mg?CH4/m3			Ministry of the Environment, Committee for the Greenhouse Gases Emissions Estimation Methods, Review of Greenhouse Gases Emissions Estimation Methods, February 2006; Ministry of the Environment, Japan, National Institute for Environmental Studies, Japan (2019) National Greenhouse Gas Inventory Report of Japan, 2019	National Inventory Report (Annex I)	Tomonori Ishigaki, Japan	348	0.00178176	Component	Waste
624560	6B2 - Domestic and Commercial Wastewater	4.D.1 - Domestic Wastewaster Treatment and Discharge	METHANE	Measured	Emission factor for sewage treatment plant: methane	Sewage treatment plant		Japan			0.00088	kg CH4/m3			Ministry of the Environment, Committee for the Greenhouse Gases Emissions Estimation Methods, Review of Greenhouse Gases Emissions Estimation Methods, February 2006; Ministry of the Environment, Japan, National Institute for Environmental Studies, Japan (2019) National Greenhouse Gas Inventory Report of Japan, 2019	National Inventory Report (Annex I)	Tomonori Ishigaki, Japan	0.00088	0.0045056	Component	Waste
624566	6B2 - Domestic and Commercial Wastewater	4.D.1 - Domestic Wastewaster Treatment and Discharge	METHANE	Measured	Emission factor for domestic sewage treatment plant (mainly Johkasou): community plants	Community plants: small-scale wastewater treatment facility regionally established		Japan			0.062	kg CH4/person/year			Ministry of the Environment, Committee for the Greenhouse Gases Emissions Estimation Methods, Review of Greenhouse Gases Emissions Estimation Methods, Waste Sector, 2010;	National Inventory Report (Annex I)	Tomonori Ishigaki, Japan	0.062	0.00707763	Component	Waste
624567	6B2 - Domestic and Commercial Wastewater	4.D.1 - Domestic Wastewaster Treatment and Discharge	METHANE	Measured	Emission factor for domestic sewage treatment plant: current type Johkasou	Advanced type Johkaso		Japan			1.514	kg CH4/person/year			Ministry of the Environment, FY2011, Survey and Studies for the Development of Emission Factor for the preparation for the National Greenhouse Gas Inventory, 2012; Ministry of the Environment, FY2012, Survey and Studies for the Development of Emission Factor for the Decentralized Commercial Wastewater Treatment for the National Greenhouse Gas Inventory, 2013.	National Inventory Report (Annex I)	Tomonori Ishigaki, Japan	1.514	0.172831	Component	Waste
624568	6B2 - Domestic and Commercial Wastewater	4.D.1 - Domestic Wastewaster Treatment and Discharge	METHANE	Measured	Emission factor for domestic sewage treatment plant: current type Johkasou	Standard type Johkaso		Japan			2.477	kg CH4/person/year			Ministry of the Environment, FY2011, Survey and Studies for the Development of Emission Factor for the preparation for the National Greenhouse Gas Inventory, 2012; Ministry of the Environment, FY2012, Survey and Studies for the Development of Emission Factor for the Decentralized Commercial Wastewater Treatment for the National Greenhouse Gas Inventory, 2013.	National Inventory Report (Annex I)	Tomonori Ishigaki, Japan	2.477	0.282763	Component	Waste
624569	6B2 - Domestic and Commercial Wastewater	4.D.1 - Domestic Wastewaster Treatment and Discharge	METHANE	Measured	Emission factor for domestic sewage treatment plant: old type Johkasou	blackwater treatment only		Japan			0.46	kg CH4/person/year			Ministry of the Environment, FY2011, Survey and Studies for the Development of Emission Factor for the preparation for the National Greenhouse Gas Inventory, 2012; Ministry of the Environment, FY2012, Survey and Studies for the Development of Emission Factor for the Decentralized Commercial Wastewater Treatment for the National Greenhouse Gas Inventory, 2013.	National Inventory Report (Annex I)	Tomonori Ishigaki, Japan	0.46	0.0525114	Component	Waste
624570	6B2 - Domestic and Commercial Wastewater	4.D.1 - Domestic Wastewaster Treatment and Discharge	METHANE	Measured	Emission factor for domestic sewage treatment plant: vault toilet			Japan			0.062	kg CH4/person/year			Ministry of the Environment, FY2011, Survey and Studies for the Development of Emission Factor for the preparation for the National Greenhouse Gas Inventory, 2012; Ministry of the Environment, FY2012, Survey and Studies for the Development of Emission Factor for the Decentralized Commercial Wastewater Treatment for the National Greenhouse Gas Inventory, 2013.	National Inventory Report (Annex I)	Tomonori Ishigaki, Japan	0.062	0.00707763	Component	Waste
624576	6B2 - Domestic and Commercial Wastewater	4.D.1 - Domestic Wastewaster Treatment and Discharge	METHANE	Other (e.g. compiled)	Emission factor for human waste treatment plant: anaerobic treatment			Japan			0.543	kg CH4/m3			Japan Environmental Sanitation Center, Report of Analytical Survey of Methane Emissions, FY1989 Commissioned by the Environmental Agency; Ministry of the Environment, Committee for the Greenhouse Gases Emissions Estimation Methods, Review of Greenhouse Gases Emissions Estimation Methods, February 2006.	National Inventory Report (Annex I)	Tomonori Ishigaki, Japan	0.543	2.78016	Component	Waste
624577	6B2 - Domestic and Commercial Wastewater	4.D.1 - Domestic Wastewaster Treatment and Discharge	METHANE	Measured	Emission factor for human waste treatment plant: aerobic treatment			Japan			0.00545	kg CH4/m3				National Inventory Report (Annex I)	Tomonori Ishigaki, Japan	0.00545	0.027904	Component	Waste
624578	6B2 - Domestic and Commercial Wastewater	4.D.1 - Domestic Wastewaster Treatment and Discharge	METHANE	Measured	Emission factor for human waste treatment plant: standard denitrification treatment			Japan			0.0059	kg CH4/m3				National Inventory Report (Annex I)	Tomonori Ishigaki, Japan	0.0059	0.030208	Component	Waste
624579	6B2 - Domestic and Commercial Wastewater	4.D.1 - Domestic Wastewaster Treatment and Discharge	METHANE	Measured	Emission factor for human waste treatment plant: high-loaded denitrification treatment			Japan			0.005	kg CH4/m3				National Inventory Report (Annex I)	Tomonori Ishigaki, Japan	0.005	0.0256	Component	Waste
624580	6B2 - Domestic and Commercial Wastewater	4.D.1 - Domestic Wastewaster Treatment and Discharge	METHANE	Other (e.g. compiled)	Emission factor for human waste treatment plant: membrane separation			Japan			0.00545	kg CH4/m3				National Inventory Report (Annex I)	Tomonori Ishigaki, Japan	0.00545	0.027904	Component	Waste
624581	6B2 - Domestic and Commercial Wastewater	4.D.1 - Domestic Wastewaster Treatment and Discharge	METHANE	Other (e.g. compiled)	Emission factor for human waste treatment plant: other treatment			Japan			0.00545	kg CH4/m3				National Inventory Report (Annex I)	Tomonori Ishigaki, Japan	0.00545	0.027904	Component	Waste
624861	6A1 - Managed Waste Disposal on Land	4.A.1 - Managed Waste Disposal Sites	METHANE	Other (e.g. compiled)	Emission factor for food waste	anaerobic landfill		Japan			145	kg CH4/t dry waste	Equation 3.3 on page 3.9 in Vol.5 of the 2006 Guidelines		Ministry of the Environment, Japan, National Institute for Environmental Studies, Japan (2019) National Greenhouse Gas Inventory Report of Japan, 2019	National Inventory Report (Annex I)	Tomonori Ishigaki, Japan	145	2.755	Component	Waste
624862	6A1 - Managed Waste Disposal on Land	4.A.1 - Managed Waste Disposal Sites	METHANE	Other (e.g. compiled)	Emission factor for paper/carboard	anaerobic landfill		Japan			136	kg CH4/t dry waste	Equation 3.3 on page 3.9 in Vol.5 of the 2006 Guidelines		Ministry of the Environment, Japan, National Institute for Environmental Studies, Japan (2019) National Greenhouse Gas Inventory Report of Japan, 2019	National Inventory Report (Annex I)	Tomonori Ishigaki, Japan	136	2.584	Component	Waste
624863	6A1 - Managed Waste Disposal on Land	4.A.1 - Managed Waste Disposal Sites	METHANE	Other (e.g. compiled)	Emission factor for natural fibers in textiles	anaerobic landfill		Japan			150	kg CH4/t dry waste	Equation 3.3 on page 3.9 in Vol.5 of the 2006 Guidelines		Ministry of the Environment, Japan, National Institute for Environmental Studies, Japan (2019) National Greenhouse Gas Inventory Report of Japan, 2019	National Inventory Report (Annex I)	Tomonori Ishigaki, Japan	150	2.85	Component	Waste
624864	6A1 - Managed Waste Disposal on Land	4.A.1 - Managed Waste Disposal Sites	METHANE	Other (e.g. compiled)	Emission factor for wood	anaerobic landfill		Japan			151	kg CH4/t dry waste	Equation 3.3 on page 3.9 in Vol.5 of the 2006 Guidelines		Ministry of the Environment, Japan, National Institute for Environmental Studies, Japan (2019) National Greenhouse Gas Inventory Report of Japan, 2019	National Inventory Report (Annex I)	Tomonori Ishigaki, Japan	151	2.869	Component	Waste
624865	6A1 - Managed Waste Disposal on Land	4.A.1 - Managed Waste Disposal Sites	METHANE	Other (e.g. compiled)	Emission factor for sludges from human waste treatment and Johkaso	anaerobic landfill		Japan			133	kg CH4/t dry waste	Equation 3.3 on page 3.9 in Vol.5 of the 2006 Guidelines		Ministry of the Environment, Japan, National Institute for Environmental Studies, Japan (2019) National Greenhouse Gas Inventory Report of Japan, 2019	National Inventory Report (Annex I)	Tomonori Ishigaki, Japan	133	2.527	Component	Waste
624866	6A1 - Managed Waste Disposal on Land	4.A.1 - Managed Waste Disposal Sites	METHANE	Other (e.g. compiled)	Emission factor for Tsunami sediment	anaerobic landfill		Japan			15	kg CH4/t dry waste	Equation 3.3 on page 3.9 in Vol.5 of the 2006 Guidelines		Ministry of the Environment, Japan, National Institute for Environmental Studies, Japan (2019) National Greenhouse Gas Inventory Report of Japan, 2019	National Inventory Report (Annex I)	Tomonori Ishigaki, Japan	15	0.285	Component	Waste
624867	6A1 - Managed Waste Disposal on Land	4.A.1 - Managed Waste Disposal Sites	METHANE	Other (e.g. compiled)	Emission factor for digested sewage sludge	anaerobic landfill		Japan			100	kg CH4/t dry waste	Equation 3.3 on page 3.9 in Vol.5 of the 2006 Guidelines		Ministry of the Environment, Japan, National Institute for Environmental Studies, Japan (2019) National Greenhouse Gas Inventory Report of Japan, 2019	National Inventory Report (Annex I)	Tomonori Ishigaki, Japan	100	1.9	Component	Waste
624868	6A1 - Managed Waste Disposal on Land	4.A.1 - Managed Waste Disposal Sites	METHANE	Other (e.g. compiled)	Emission factor for sewage sludge	anaerobic landfill		Japan			133	kg CH4/t dry waste	Equation 3.3 on page 3.9 in Vol.5 of the 2006 Guidelines		Ministry of the Environment, Japan, National Institute for Environmental Studies, Japan (2019) National Greenhouse Gas Inventory Report of Japan, 2019	National Inventory Report (Annex I)	Tomonori Ishigaki, Japan	133	2.527	Component	Waste
624869	6A1 - Managed Waste Disposal on Land	4.A.1 - Managed Waste Disposal Sites	METHANE	Other (e.g. compiled)	Emission factor for waterwoks sludge	anaerobic landfill		Japan			20	kg CH4/t dry waste	Equation 3.3 on page 3.9 in Vol.5 of the 2006 Guidelines		Ministry of the Environment, Japan, National Institute for Environmental Studies, Japan (2019) National Greenhouse Gas Inventory Report of Japan, 2019	National Inventory Report (Annex I)	Tomonori Ishigaki, Japan	20	0.38	Component	Waste
624870	6A1 - Managed Waste Disposal on Land	4.A.1 - Managed Waste Disposal Sites	METHANE	Other (e.g. compiled)	Emission factor for organic sludge from maunufacturing process	anaerobic landfill		Japan			150	kg CH4/t dry waste	Equation 3.3 on page 3.9 in Vol.5 of the 2006 Guidelines		Ministry of the Environment, Japan, National Institute for Environmental Studies, Japan (2019) National Greenhouse Gas Inventory Report of Japan, 2019	National Inventory Report (Annex I)	Tomonori Ishigaki, Japan	150	2.85	Component	Waste
624871	6A1 - Managed Waste Disposal on Land	4.A.1 - Managed Waste Disposal Sites	METHANE	Other (e.g. compiled)	Emission factor for livestock waste	anaerobic landfill		Japan			133	kg CH4/t dry waste	Equation 3.3 on page 3.9 in Vol.5 of the 2006 Guidelines		Ministry of the Environment, Japan, National Institute for Environmental Studies, Japan (2019) National Greenhouse Gas Inventory Report of Japan, 2019	National Inventory Report (Annex I)	Tomonori Ishigaki, Japan	133	2.527	Component	Waste
624872	6A1 - Managed Waste Disposal on Land	4.A.1 - Managed Waste Disposal Sites	METHANE	Other (e.g. compiled)	Emission factor for food waste	semi-aerobic landfill		Japan			72	kg CH4/t dry waste	Equation 3.3 on page 3.9 in Vol.5 of the 2006 Guidelines		Ministry of the Environment, Japan, National Institute for Environmental Studies, Japan (2019) National Greenhouse Gas Inventory Report of Japan, 2019	National Inventory Report (Annex I)	Tomonori Ishigaki, Japan	72	1.368	Component	Waste
624873	6A1 - Managed Waste Disposal on Land	4.A.1 - Managed Waste Disposal Sites	METHANE	Other (e.g. compiled)	Emission factor for paper/carboard	semi-aerobic landfill		Japan			68	kgCH4/t dry waste	Equation 3.3 on page 3.9 in Vol.5 of the 2006 Guidelines		Ministry of the Environment, Japan, National Institute for Environmental Studies, Japan (2019) National Greenhouse Gas Inventory Report of Japan, 2019	National Inventory Report (Annex I)	Tomonori Ishigaki, Japan	68	1.292	Component	Waste
624874	6A1 - Managed Waste Disposal on Land	4.A.1 - Managed Waste Disposal Sites	METHANE	Other (e.g. compiled)	Emission factor for textiles (natural fibers)	semi-aerobic landfill		Japan			75	kgCH4/t dry waste	Equation 3.3 on page 3.9 in Vol.5 of the 2006 Guidelines		Ministry of the Environment, Japan, National Institute for Environmental Studies, Japan (2019) National Greenhouse Gas Inventory Report of Japan, 2019	National Inventory Report (Annex I)	Tomonori Ishigaki, Japan	75	1.425	Component	Waste
624875	6A1 - Managed Waste Disposal on Land	4.A.1 - Managed Waste Disposal Sites	METHANE	Other (e.g. compiled)	Emission factor for wood	semi-aerobic landfill		Japan			75	kg CH4/t dry waste	Equation 3.3 on page 3.9 in Vol.5 of the 2006 Guidelines		Ministry of the Environment, Japan, National Institute for Environmental Studies, Japan (2019) National Greenhouse Gas Inventory Report of Japan, 2019	National Inventory Report (Annex I)	Tomonori Ishigaki, Japan	75	1.425	Component	Waste
624876	6A1 - Managed Waste Disposal on Land	4.A.1 - Managed Waste Disposal Sites	METHANE	Other (e.g. compiled)	Emission factor for sludges from Human waste treatment and Johkaso	semi-aerobic landfill		Japan			67	kg CH4/t dry waste	Equation 3.3 on page 3.9 in Vol.5 of the 2006 Guidelines		Ministry of the Environment, Japan, National Institute for Environmental Studies, Japan (2019) National Greenhouse Gas Inventory Report of Japan, 2019	National Inventory Report (Annex I)	Tomonori Ishigaki, Japan	67	1.273	Component	Waste
624877	6A1 - Managed Waste Disposal on Land	4.A.1 - Managed Waste Disposal Sites	METHANE	Other (e.g. compiled)	Emission factor for digested sewage sludge	semi-aerobic landfill		Japan			50	kg CH4/t dry waste	Equation 3.3 on page 3.9 in Vol.5 of the 2006 Guidelines		Ministry of the Environment, Japan, National Institute for Environmental Studies, Japan (2019) National Greenhouse Gas Inventory Report of Japan, 2019	National Inventory Report (Annex I)	Tomonori Ishigaki, Japan	50	0.95	Component	Waste
624878	6A1 - Managed Waste Disposal on Land	4.A.1 - Managed Waste Disposal Sites	METHANE	Other (e.g. compiled)	Emission factor for other sewage sludge	semi-aerobic landfill		Japan			67	kg CH4/t dry waste	Equation 3.3 on page 3.9 in Vol.5 of the 2006 Guidelines		Ministry of the Environment, Japan, National Institute for Environmental Studies, Japan (2019) National Greenhouse Gas Inventory Report of Japan, 2019	National Inventory Report (Annex I)	Tomonori Ishigaki, Japan	67	1.273	Component	Waste
624879	6A1 - Managed Waste Disposal on Land	4.A.1 - Managed Waste Disposal Sites	METHANE	Other (e.g. compiled)	Emission factor for waterwoks sludge	semi-aerobic landfill		Japan			10	kg CH4/t dry waste	Equation 3.3 on page 3.9 in Vol.5 of the 2006 Guidelines		Ministry of the Environment, Japan, National Institute for Environmental Studies, Japan (2019) National Greenhouse Gas Inventory Report of Japan, 2019	National Inventory Report (Annex I)	Tomonori Ishigaki, Japan	10	0.19	Component	Waste
624880	6A1 - Managed Waste Disposal on Land	4.A.1 - Managed Waste Disposal Sites	METHANE	Other (e.g. compiled)	Emission factor for organic sludge from maunufacturing process	semi-aerobic landfill		Japan			75	kg CH4/t dry waste	Equation 3.3 on page 3.9 in Vol.5 of the 2006 Guidelines		Ministry of the Environment, Japan, National Institute for Environmental Studies, Japan (2019) National Greenhouse Gas Inventory Report of Japan, 2019	National Inventory Report (Annex I)	Tomonori Ishigaki, Japan	75	1.425	Component	Waste
624881	6A1 - Managed Waste Disposal on Land	4.A.1 - Managed Waste Disposal Sites	METHANE	Other (e.g. compiled)	Emission factor for livestock waste	semi-aerobic landfill		Japan			67	kg CH4/t dry waste	Equation 3.3 on page 3.9 in Vol.5 of the 2006 Guidelines		Ministry of the Environment, Japan, National Institute for Environmental Studies, Japan (2019) National Greenhouse Gas Inventory Report of Japan, 2019	National Inventory Report (Annex I)	Tomonori Ishigaki, Japan	67	1.273	Component	Waste
625374	6D - Other (please specify)	4.B - Biological Treatment of Solid Waste	METHANE	Other (e.g. compiled)	Emission factor for windrow composting processes	Aerobic windrow composting of f bio-waste, loppings and home composting material. Aerobic windrow composting is the dominant form of biological treatment of solid waste employed in Australia as of 2020.	Country-specific for the aerobic windrow composting technology	Australia			0.00075	t CH4/tonne of material processed	Equation 4.1 on Page 4.5, Chapter 4, Volume 5 of the 2006 IPCC Guidelines	Worksheet "4B_CH4 emissions"	National Inventory Report Volume 2, Australian Government Department of Industry, Science, Energy and Resources, 2020 submission	National inventory report, Annex I	IPCC TFI TSU	0.00075	0.01425	Component	Waste
625607	6D - Other (please specify)	4.B - Biological Treatment of Solid Waste	METHANE	Measured	Methane emission rate	Mechanical biological treatment-windrow pile (4 m height)	Mixed MSW composed of 73.93% degradable organics, 19.73% plastics, with 52.90% moisture	Thailand/tropical climate	MBT windrow pile was used for MSW biostabisation prior to physical separation of Refuse Derived Fuel		5.32	g/ton dry wt/d			Sutthasil, N., Chiemchaisri, C., Chiemchaisri, W., Ishigaki, T., Ochiai, S., Yamada, M., 2020, Greenhouse gas emission from windrow pile for mechanical biological treatment of municipal solid wastes in tropical climate, Journal of Material Cycles and Waste Management, 22, 383-395.	Peer-reviewed journal	Chart Chiemchaisri, Thailand	5.32	0.221667	Component	Waste
625609	6D - Other (please specify)	4.B - Biological Treatment of Solid Waste	METHANE	Measured	Methane emission rate	Mechanical biological treatment-shallow windrow pile (0.5-1 m height)	Waste in pile composed of 49.4% putrescible wastes, 45.3% plastic, with 77.2% moisture content	Thailand/tropical climate (dry season measurement)	Shallow windrow pile of 0.5-1 m height was used for MSW biostabisation prior to physical separation of Refuse Derived Fuel		19.14	g/ton dry wt/d			Wangyao, K., Sutthasil, N., Chiemchaisri, C., 2021, Methane and nitrous oxide emissions from shallow windrow piles for biostabilsation of municipal solid waste, Journal of Air and Waste Management Association, 71(5), 650-660.	Peer-reviewed journal	Chart Chiemchaisri, Thailand	19.14	0.7975	Component	Waste
625610	6D - Other (please specify)	4.B - Biological Treatment of Solid Waste	METHANE	Measured	Methane emission rate	Mechanical biological treatment-shallow windrow pile (0.5-1 m height)	Waste in pile composed of 49.4% putrescible wastes, 45.3% plastic, with 77.2% moisture content	Thailand/tropical climate (dry season measurement)	Shallow windrow pile of 0.5-1 m height was used for MSW biostabisation prior to physical separation of Refuse Derived Fuel		14.29	g/ton dry wt/d			Wangyao, K., Sutthasil, N., Chiemchaisri, C., 2021, Methane and nitrous oxide emissions from shallow windrow piles for biostabilsation of municipal solid waste, Journal of Air and Waste Management Association, 71(5), 650-660.	Peer-reviewed journal	Chart Chiemchaisri, Thailand	14.29	0.595417	Component	Waste
625611	6D - Other (please specify)	4.B - Biological Treatment of Solid Waste	METHANE	Measured	Methane emission rate	Mechanical biological treatment-shallow windrow pile (0.5-1 m height)	Waste in pile composed of 15.6% putrescible wastes, 76.7% plastic, with 57.2% moisture content	Thailand/tropical climate (dry season measurement)	Shallow windrow pile of 0.5-1 m height was used for MSW biostabisation prior to physical separation of Refuse Derived Fuel		16.36	g/ton dry wt/d			Wangyao, K., Sutthasil, N., Chiemchaisri, C., 2021, Methane and nitrous oxide emissions from shallow windrow piles for biostabilsation of municipal solid waste, Journal of Air and Waste Management Association, 71(5), 650-660.	Peer-reviewed journal	Chart Chiemchaisri, Thailand	16.36	0.681667	Component	Waste
625612	6D - Other (please specify)	4.B - Biological Treatment of Solid Waste	METHANE	Measured	Methane emission rate	Mechanical biological treatment-shallow windrow pile (0.5-1 m height)	Waste in pile composed of 15.6% putrescible wastes, 76.7% plastic, with 57.2% moisture content	Thailand/tropical climate (dry season measurement)	Shallow windrow pile of 0.5-1 m height was used for MSW biostabisation prior to physical separation of Refuse Derived Fuel		4.56	g/ton dry wt/d			Wangyao, K., Sutthasil, N., Chiemchaisri, C., 2021, Methane and nitrous oxide emissions from shallow windrow piles for biostabilsation of municipal solid waste, Journal of Air and Waste Management Association, 71(5), 650-660.	Peer-reviewed journal	Chart Chiemchaisri, Thailand	4.56	0.19	Component	Waste
625613	6D - Other (please specify)	4.B - Biological Treatment of Solid Waste	METHANE	Measured	Methane emission rate	Mechanical biological treatment-shallow windrow pile (0.5-1 m height)	Waste in pile composed of 14.8% putrescible wastes, 80.9% plastic, with 42.3% moisture content	Thailand/tropical climate (dry season measurement)	Shallow windrow pile of 0.5-1 m height was used for MSW biostabisation prior to physical separation of Refuse Derived Fuel		2.18	g/ton dry wt/d			Wangyao, K., Sutthasil, N., Chiemchaisri, C., 2021, Methane and nitrous oxide emissions from shallow windrow piles for biostabilsation of municipal solid waste, Journal of Air and Waste Management Association, 71(5), 650-660.	Peer-reviewed journal	Chart Chiemchaisri, Thailand	2.18	0.0908333	Component	Waste
625614	6D - Other (please specify)	4.B - Biological Treatment of Solid Waste	METHANE	Measured	Methane emission rate	Mechanical biological treatment-shallow windrow pile (0.5-1 m height)	Waste in pile composed of 14.8% putrescible wastes, 80.9% plastic, with 42.3% moisture content	Thailand/tropical climate (dry season measurement)	Shallow windrow pile of 0.5-1 m height was used for MSW biostabisation prior to physical separation of Refuse Derived Fuel		2.09	g/ton dry wt/d			Wangyao, K., Sutthasil, N., Chiemchaisri, C., 2021, Methane and nitrous oxide emissions from shallow windrow piles for biostabilsation of municipal solid waste, Journal of Air and Waste Management Association, 71(5), 650-660.	Peer-reviewed journal	Chart Chiemchaisri, Thailand	2.09	0.0870833	Component	Waste
